# Supplementary material
Source: publisher figshare collection journal article supplement (https://gsapubs.figshare.com/ndownloader/files/34070909)
Supplement: Supplementary file 1 [file 34070909]

## Sheet: results
Sev Cr Thick	37.2576	40.4025	39.8445	42.2808	34.4444	36.4869	39.0415	43.8855	36.7914	35.2548	41.7019	48.1964	39.7296	40.0291	36.7803	42.9895	35.5378	38.092	36.6128	41.2329	37.879	38.0314	48.0737	39.6331	37.4912	39.7472	45.6046	36.8132	42.5146	38.8243	40.8221	38.5724	35.032	39.8945	39.2359	36.4889	34.4991	40.7438	44.2768	45.216	41.1853	37.3638	37.1668	48.7902	38.3458	37.832	37.9378	37.8481	38.1062
Lar Cr. Th	46.0405	46.4001	45.1442	52.5244	40.5599	41.4004	45.2582	52.7555	41.7049	41.6905	49.3749	57.0448	49.4167	46.8395	41.0737	52.1759	39.3429	45.7255	41.2885	47.5488	42.3354	44.7845	57.2178	47.1459	42.3369	44.663	55.2363	41.2175	52.1016	45.6387	46.3271	46.2887	39.8608	47.3686	47.9839	41.5415	38.1923	45.9752	54.903	53.9426	47.7598	45.274	41.081	60.5127	45.275	46.5289	44.014	45.9052	44.4953
Sec Elev	1.89177	1.50994	1.42938	2.06575	1.52734	1.29594	1.45174	1.87143	1.38065	1.45516	1.75565	1.82718	1.98387	1.61509	1.32377	1.96128	1.20287	1.79303	1.25799	1.6525	1.42367	1.59086	1.92559	1.6235	1.35539	1.46907	1.91814	1.22914	1.88001	1.62694	1.41048	1.67165	1.31559	1.6909	1.87939	1.4062	1.23985	1.49052	2.00053	1.81186	1.53459	1.7772	1.29043	2.11282	1.51339	1.76281	1.53709	1.80332	1.61349
Lar Elev	3.4396	2.46779	2.27976	3.78052	2.59944	2.07259	2.41038	3.28171	2.204	2.49241	3.01256	3.13368	3.63621	2.72216	2.05177	3.48428	1.82997	3.13798	1.98849	2.71986	2.21039	2.7076	3.32951	2.80495	2.14813	2.30587	3.39829	1.91534	3.38244	2.76169	2.25647	2.92436	2.11491	2.91352	3.37228	2.26286	1.88615	2.35885	3.65292	3.14342	2.54939	3.15035	1.95622	3.85896	2.5861	3.18606	2.55545	3.20079	2.71045
CC thick	29.2861	34.1152	28.4322	30.2902	28.7728	32.4632	27.0823	30.2855	29.0506	29.648	31.0935	25.6217	29.5527	31.7002	27.5703	29.9631	26.4345	28.587	27.4836	28.3913	30.1415	26.6519	29.1199	33.3247	29.9586	29.4816	30.3574	29.563	30.0881	30.09	29.7068	28.506	27.2691	29.136	30.2163	27.7498	30.8774	32.6845	30.5018	26.4383	34.0232	33.9499	28.5566	29.0776	27.1068	28.2471	30.1252	28.4597	31.3121
Yonkee model
CC thick	36.8591	33.2912	33.3626	34.7248	33.6323	35.8719	38.7143	35.4721	34.0851	35.3192	34.5764	35.4568	35.1184	34.9548	36.2033	36.9254	35.672	33.9679	35.1489	37.8608	33.779	35.8049	35.5744	35.0312	36.5491	35.1155	36.9359	36.779	35.5358	33.3972	37.556	35.4302	35.8914	39.9809	34.8937	35.1171	34.3842	34.2824	35.4108	34.4533	35.322	34.0174	32.0221	36.1947	34.1207	33.6752	35.5931	34.0191	35.4167
Sev Cr Thick	50.2661	46.7216	46.3582	47.6734	42.8409	49.4916	54.0416	48.5825	42.9072	49.5299	45.9914	48.3853	48.1894	45.1496	46.7335	51.0527	46.959	45.7618	49.2872	48.9277	44.0382	48.5294	46.4572	45.2056	46.5367	47.0628	47.4857	48.2305	49.9066	45.3504	48.8663	47.8857	50.5392	54.6339	45.4618	47.8826	47.9993	47.6744	46.7767	43.9981	47.9578	43.5652	43.583	48.1834	45.4343	44.5629	45.1178	43.1063	44.6464
Lar Cr. Th	60.3031	57.682	56.6668	57.5766	48.0058	60.068	66.362	58.5338	47.515	61.1023	53.8156	58.0846	58.1706	51.302	53.0693	62.0936	54.3807	54.2339	60.7983	55.6229	50.5063	57.8631	53.3707	51.3173	52.1252	55.487	53.7044	55.6388	61.6573	54.1733	55.9337	56.934	62.6038	65.676	52.105	57.4342	58.9448	58.3222	54.3574	49.4279	57.2805	49.0809	52.1817	56.4267	53.2211	51.8765	50.3112	48.0499	49.5108
Sec Elev	2.15354	2.36926	2.26774	2.18806	1.59466	2.23942	2.28831	2.18473	1.52221	2.29072	1.91349	2.1374	2.20748	1.7375	1.70421	2.2366	1.85149	2.03929	2.33239	1.74062	1.78589	2.01691	1.76112	1.77425	1.63984	1.99596	1.72266	1.86202	2.42522	2.04612	1.82607	2.01267	2.39055	2.21337	1.73155	2.11778	2.36013	2.27161	1.87352	1.56675	1.99781	1.65615	2.02231	1.94674	1.93926	1.87793	1.5375	1.55321	1.52206
Lar Elev	3.76577	4.30278	4.06657	3.86152	2.48909	3.97844	4.1277	3.84303	2.31725	4.15617	3.22505	3.74094	3.89313	2.78606	2.72959	3.98457	3.06892	3.50423	4.23135	2.79365	2.91185	3.49635	2.8799	2.84003	2.55742	3.40334	2.73812	3.06662	4.40827	3.55643	2.96712	3.47479	4.35951	3.8813	2.82003	3.70238	4.25749	4.07772	3.12308	2.45802	3.4718	2.61289	3.52645	3.28529	3.27399	3.1394	2.37582	2.39819	2.32423
[truncated: 5,000 more columns]

## Sheet: results2
CC thickness	Sev Cr Thick	Lar Cr. Th	45 Ma	25 Ma	Today	CC thick	Sev Cr Thick	Lar Cr. Th	45 Ma	25 Ma	Today		Sec Elev	Lar Elev	45 Ma	25 Ma	Today		Sec Elev	Lar Elev	45 Ma	25 Ma	Today					Open system						Closed system							Open system						Closed system
29.2861	37.2576	46.0405	37.9926	44.6714	31.786	36.8591	50.2661	60.3031	52.2456	45.5593	32.2355		1.07897	3.4396			0.779037		2.15354	3.76577	2.52212	2.40354	0.461816					160 Ma	80 Ma	55 Ma	45 Ma	25 Ma	Today	160 Ma	80 Ma	55 Ma	45 Ma	25 Ma	Today		160 Ma	80 Ma	55 Ma	45 Ma	25 Ma	Today	160 Ma	80 Ma	55 Ma
34.1152	40.4025	46.4001	40.0849	43.8538	31.062	33.2912	46.7216	57.682	57.952	44.6104	31.8784		1.07976	2.46779			0.809247		2.36926	4.30278	2.5726	2.45003	0.522233				20	0	0	0	39	42	0	0	0	0	1	4	0	20	0	0	0	0	0	0	0	0	0
28.4322	39.8445	45.1442	41.1402	42.7524	31.8487	33.3626	46.3582	56.6668	50.4091	47.1153	31.124		1.09832	2.27976			0.825411		2.26774	4.06657	2.62646	2.47445	0.579199				20.5	0	0	0	2	1	0	0	0	0	0	0	0	20.5	0	0	0	0.0002	0.0001	0	0	0	0
30.2902	42.2808	52.5244	42.1778	37.3441	30.527	34.7248	47.6734	57.5766	53.1997	43.8299	31.4641		1.09857	3.78052			0.828305		2.18806	3.86152	2.69189	2.48684	0.58364				21	0	0	0	4	7	0	0	0	0	0	0	0	21	0	0	0	0.0004	0.0007	0	0	0	0
28.7728	34.4444	40.5599	50.0388	44.9324	31.9527	33.6323	42.8409	48.0058	60.3369	45.4249	32.493		1.09906	2.59944			0.830905		1.59466	2.48909	2.69757	2.50044	0.586578				21.5	0	0	0	4	3	0	0	0	0	0	0	0	21.5	0	0	0	0.0004	0.0003	0	0	0	0
32.4632	36.4869	41.4004	34.6173	40.8638	31.6986	35.8719	49.4916	60.068	54.4207	44.8391	31.6579		1.10133	2.07259			0.835602		2.23942	3.97844	2.70664	2.53425	0.618816				22	0	0	0	2	2	0	0	0	0	0	0	0	22	0	0	0	0.0002	0.0002	0	0	0	0
27.0823	39.0415	45.2582	50.4089	41.6822	32.0286	38.7143	54.0416	66.362	54.0194	45.3374	30.6582		1.11131	2.41038			0.836999		2.28831	4.1277	2.70826	2.53453	0.62596				22.5	0	0	0	4	4	0	0	0	0	0	1	0	22.5	0	0	0	0.0004	0.0004	0	0	0	0
30.2855	43.8855	52.7555	55.728	47.4924	30.2847	35.4721	48.5825	58.5338	55.996	44.8388	31.3565		1.11322	3.28171			0.897755		2.18473	3.84303	2.73174	2.54842	0.626427				23	0	0	0	4	5	0	0	0	0	0	0	0	23	0	0	0	0.0004	0.0005	0	0	0	0
29.0506	36.7914	41.7049	52.6042	44.1717	32.1716	34.0851	42.9072	47.515	52.9211	44.3977	32.0112		1.11422	2.204			0.90237		1.52221	2.31725	2.73337	2.55127	0.633149				23.5	0	0	0	2	10	0	0	0	0	0	0	0	23.5	0	0	0	0.0002	0.001	0	0	0	0
29.648	35.2548	41.6905	49.2584	42.4811	30.4325	35.3192	49.5299	61.1023	53.075	43.727	31.9088		1.11509	2.49241			0.905111		2.29072	4.15617	2.73775	2.55217	0.635973				24	0	0	0	1	6	0	0	0	0	0	0	0	24	0	0	0	0.0001	0.0006	0	0	0	0
31.0935	41.7019	49.3749	47.5747	42.2128	30.9275	34.5764	45.9914	53.8156	53.9557	44.8699	30.7392		1.1156	3.01256			0.911716		1.91349	3.22505	2.74821	2.55248	0.645659				24.5	16	0	0	3	10	0	0	0	0	0	0	0	24.5	0.0016	0	0	0.0003	0.001	0	0	0	0
25.6217	48.1964	57.0448	52.5531	42.9096	30.3488	35.4568	48.3853	58.0846	54.5111	47.2773	30.7535		1.11654	3.13368			0.917598		2.1374	3.74094	2.75691	2.55509	0.656247				25	52	0	0	3	10	0	0	0	0	0	0	0	25	0.0052	0	0	0.0003	0.001	0	0	0	0
29.5527	39.7296	49.4167	48.6986	42.2343	31.9085	35.1184	48.1894	58.1706	57.0202	45.258	31.7477		1.11915	3.63621			0.928269		2.20748	3.89313	2.7577	2.55581	0.657558				25.5	102	0	0	1	10	0	0	0	0	0	0	0	25.5	0.0102	0	0	0.0001	0.001	0	0	0	0
31.7002	40.0291	46.8395	51.8566	39.5587	30.697	34.9548	45.1496	51.302	55.5438	43.8565	30.8287		1.12047	2.72216			0.931317		1.7375	2.78606	2.77931	2.57095	0.657575				26	196	0	0	8	9	0	0	0	0	0	0	0	26	0.0196	0	0	0.0008	0.0009	0	0	0	0
27.5703	36.7803	41.0737	49.7097	44.7911	31.1142	36.2033	46.7335	53.0693	58.9619	46.819	31.3013		1.12314	2.05177			0.935896		1.70421	2.72959	2.78451	2.5717	0.658756				26.5	345	0	0	9	9	0	0	0	0	0	0	0	26.5	0.0345	0	0	0.0009	0.0009	0	0	0	0
29.9631	42.9895	52.1759	50.5037	39.2831	31.4823	36.9254	51.0527	62.0936	54.7226	44.1299	32.1766		1.12416	3.48428			0.944797		2.2366	3.98457	2.79526	2.57419	0.666391				27	500	0	0	12	18	0	0	0	0	0	0	0	27	0.05	0	0	0.0012	0.0018	0	0	0	0
26.4345	35.5378	39.3429	44.5775	39.414	31.7696	35.672	46.959	54.3807	55.3397	43.9408	32.6994		1.12494	1.82997			0.945093		1.85149	3.06892	2.79577	2.57974	0.667171				27.5	645	0	0	7	19	0	0	0	0	0	0	0	27.5	0.0645	0	0	0.0007	0.0019	0	0	0	0
28.587	38.092	45.7255	48.2267	29.8285	32.8827	33.9679	45.7618	54.2339	54.6198	42.8711	31.121		1.12624	3.13798			0.953738		2.03929	3.50423	2.79785	2.58341	0.667893				28	753	0	0	7	16	0	0	0	0	0	0	0	28	0.0753	0	0	0.0007	0.0016	0	0	0	0
27.4836	36.6128	41.2885	47.2909	42.0328	30.2172	35.1489	49.2872	60.7983	52.6112	43.2755	30.905		1.12746	1.98849			0.953762		2.33239	4.23135	2.79836	2.5882	0.671364				28.5	870	0	0	14	22	0	0	0	0	0	0	0	28.5	0.087	0	0	0.0014	0.0022	0	0	0	0
28.3913	41.2329	47.5488	43.8656	43.3722	33.4689	37.8608	48.9277	55.6229	54.4901	43.4662	33.1437		1.12796	2.71986			0.957108		1.74062	2.79365	2.81347	2.58971	0.672279				29	915	0	0	13	17	2	0	0	0	0	0	3	29	0.0915	0	0	0.0013	0.0017	0.0002	0	0	0
30.1415	37.879	42.3354	33.1522	41.2454	30.4254	33.779	44.0382	50.5063	57.9041	42.7855	31.0722		1.12914	2.21039			0.966451		1.78589	2.91185	2.82132	2.59161	0.673848				29.5	909	0	0	16	19	40	0	0	0	0	0	40	29.5	0.0909	0	0	0.0016	0.0019	0.004	0	0	0
26.6519	38.0314	44.7845	42.4968	42.978	31.5483	35.8049	48.5294	57.8631	51.5558	46.8608	31.2324		1.13001	2.7076			0.966665		2.01691	3.49635	2.82412	2.60261	0.676456				30	867	2	0	11	31	168	0	0	0	0	0	196	30	0.0867	0.0002	0	0.0011	0.0031	0.0168	0	0	0
29.1199	48.0737	57.2178	48.9457	41.0161	31.4171	35.5744	46.4572	53.3707	62.7995	43.0157	30.514		1.13186	3.32951			0.976366		1.76112	2.8799	2.82657	2.60287	0.678783				30.5	808	1	0	22	20	724	0	0	0	0	0	699	30.5	0.0808	0.0001	0	0.0022	0.002	0.0724	0	0	0
33.3247	39.6331	47.1459	46.672	42.6096	32.1521	35.0312	45.2056	51.3173	55.8079	44.8525	30.5906		1.13463	2.80495			0.976527		1.77425	2.84003	2.82975	2.60603	0.682873				31	729	5	0	30	22	1556	0	0	0	0	0	1626	31	0.0729	0.0005	0	0.003	0.0022	0.1556	0	0	0
29.9586	37.4912	42.3369	48.838	41.8977	30.3447	36.5491	46.5367	52.1252	58.9995	44.3598	30.5494		1.13483	2.14813			0.981986		1.63984	2.55742	2.83891	2.60923	0.684837				31.5	623	12	0	16	40	2520	0	0	0	0	0	2481	31.5	0.0623	0.0012	0	0.0016	0.004	0.252	0	0	0
29.4816	39.7472	44.663	50.0452	41.7363	32.0042	35.1155	47.0628	55.487	57.6018	46.0917	30.7206		1.13682	2.30587			0.988591		1.99596	3.40334	2.83988	2.61455	0.685677				32	467	16	0	18	40	2526	2	0	0	0	0	2470	32	0.0467	0.0016	0	0.0018	0.004	0.2526	0.0002	0	0
30.3574	45.6046	55.2363	42.2222	42.4199	31.5862	36.9359	47.4857	53.7044	54.8718	45.0008	31.1103		1.13705	3.39829			0.988631		1.72266	2.73812	2.84159	2.61523	0.690989				32.5	359	38	0	21	51	1620	28	0	0	0	0	1544	32.5	0.0359	0.0038	0	0.0021	0.0051	0.162	0.0028	0	0
29.563	36.8132	41.2175	49.5028	44.6156	32.1451	36.779	48.2305	55.6388	61.5029	44.9679	30.9987		1.1373	1.91534			0.989026		1.86202	3.06662	2.84354	2.61732	0.691813				33	259	59	1	28	51	624	86	0	0	0	0	721	33	0.0259	0.0059	0.0001	0.0028	0.0051	0.0624	0.0086	0	0
30.0881	42.5146	52.1016	47.4306	44.0693	32.0492	35.5358	49.9066	61.6573	56.1437	45.7102	31.1336		1.1382	3.38244			0.991001		2.42522	4.40827	2.84485	2.62109	0.692895				33.5	181	80	1	29	62	176	286	0	0	0	1	174	33.5	0.0181	0.008	0.0001	0.0029	0.0062	0.0176	0.0286	0	0
30.09	38.8243	45.6387	41.1916	44.3689	30.9134	33.3972	45.3504	54.1733	55.0924	43.7683	30.7492		1.13828	2.76169			0.991382		2.04612	3.55643	2.84989	2.6218	0.693997				34	145	141	2	30	81	40	571	0	0	0	0	44	34	0.0145	0.0141	0.0002	0.003	0.0081	0.004	0.0571	0	0
29.7068	40.8221	46.3271	47.0263	43.771	31.3503	37.556	48.8663	55.9337	55.4433	46.1001	32.042		1.13902	2.25647			0.99176		1.82607	2.96712	2.85156	2.62258	0.695116				34.5	106	197	6	48	76	4	902	0	0	0	0	2	34.5	0.0106	0.0197	0.0006	0.0048	0.0076	0.0004	0.0902	0	0
28.506	38.5724	46.2887	49.9857	39.7831	31.2625	35.4302	47.8857	56.934	55.2902	44.0523	31.0821		1.1391	2.92436			0.993265		2.01267	3.47479	2.85532	2.62352	0.699282				35	58	243	4	36	108	0	1310	0	0	0	0	0	35	0.0058	0.0243	0.0004	0.0036	0.0108	0	0.131	0	0
27.2691	35.032	39.8608	47.4384	42.9318	33.3607	35.8914	50.5392	62.6038	54.2191	45.4844	30.8568		1.14083	2.11491			0.998014		2.39055	4.35951	2.8608	2.62778	0.704751				35.5	47	293	13	57	116	0	1366	0	0	0	0	0	35.5	0.0047	0.0293	0.0013	0.0057	0.0116	0	0.1366	0	0
29.136	39.8945	47.3686	47.5061	45.185	31.3571	39.9809	54.6339	65.676	56.869	44.475	30.5224		1.14089	2.91352			1.00075		2.21337	3.8813	2.86409	2.62833	0.706054				36	32	393	17	50	117	0	1437	0	0	0	0	0	36	0.0032	0.0393	0.0017	0.005	0.0117	0	0.1437	0	0
30.2163	39.2359	47.9839	46.3553	42.3999	32.4849	34.8937	45.4618	52.105	52.8022	43.9808	31.8144		1.14109	3.37228			1.00498		1.73155	2.82003	2.87157	2.63003	0.712406				36.5	9	409	34	63	156	0	1274	0	0	0	0	0	36.5	0.0009	0.0409	0.0034	0.0063	0.0156	0	0.1274	0	0
27.7498	36.4889	41.5415	38.4544	39.7879	31.4538	35.1171	47.8826	57.4342	54.8134	45.4582	31.55		1.14156	2.26286			1.00499		2.11778	3.70238	2.87165	2.63359	0.713148				37	4	542	44	60	156	0	989	0	0	0	0	0	37	0.0004	0.0542	0.0044	0.006	0.0156	0	0.0989	0	0
30.8774	34.4991	38.1923	42.7003	41.0974	32.0802	34.3842	47.9993	58.9448	51.9759	43.4403	31.1372		1.14215	1.88615			1.00667		2.36013	4.25749	2.8725	2.64153	0.716232				37.5	0	590	62	80	180	0	675	0	0	0	0	0	37.5	0	0.059	0.0062	0.008	0.018	0	0.0675	0	0
32.6845	40.7438	45.9752	55.2256	43.0719	30.857	34.2824	47.6744	58.3222	53.824	42.6573	31.8926		1.14253	2.35885			1.00941		2.27161	4.07772	2.87614	2.64197	0.716763				38	3	593	94	80	238	0	454	0	0	0	1	0	38	0.0003	0.0593	0.0094	0.008	0.0238	0	0.0454	0	0
30.5018	44.2768	54.903	52.8743	42.4318	31.3472	35.4108	46.7767	54.3574	54.9572	45.3957	30.717		1.14366	3.65292			1.00958		1.87352	3.12308	2.87761	2.64284	0.71754				38.5	0	630	103	109	292	0	293	0	0	0	0	0	38.5	0	0.063	0.0103	0.0109	0.0292	0	0.0293	0	0
26.4383	45.216	53.9426	50.4642	41.2274	31.935	34.4533	43.9981	49.4279	57.1403	44.1821	31.8048		1.14437	3.14342			1.01687		1.56675	2.45802	2.88001	2.64746	0.719817				39	0	632	114	93	349	0	184	0	0	0	1	0	39	0	0.0632	0.0114	0.0093	0.0349	0	0.0184	0	0
34.0232	41.1853	47.7598	49.2531	43.1402	31.2898	35.322	47.9578	57.2805	53.873	45.3944	32.7541		1.14443	2.54939			1.01976		1.99781	3.4718	2.88253	2.65009	0.725241				39.5	0	699	175	116	425	0	83	0	0	0	2	0	39.5	0	0.0699	0.0175	0.0116	0.0425	0	0.0083	0	0
33.9499	37.3638	45.274	51.3797	38.549	30.6726	34.0174	43.5652	49.0809	53.355	44.3366	31.4029		1.14448	3.15035			1.02301		1.65615	2.61289	2.88448	2.65061	0.727258				40	0	606	201	128	461	0	29	0	0	0	5	0	40	0	0.0606	0.0201	0.0128	0.0461	0	0.0029	0	0
28.5566	37.1668	41.081	53.0096	43.1108	32.153	32.0221	43.583	52.1817	55.9482	43.7398	31.0081		1.14608	1.95622			1.02398		2.02231	3.52645	2.88508	2.6563	0.729607				40.5	0	525	227	138	561	0	19	0	0	0	11	0	40.5	0	0.0525	0.0227	0.0138	0.0561	0	0.0019	0	0
29.0776	48.7902	60.5127	44.7976	39.1089	31.5717	36.1947	48.1834	56.4267	60.7729	44.6423	31.4407		1.14619	3.85896			1.02486		1.94674	3.28529	2.89127	2.66135	0.733059				41	0	511	249	156	644	0	5	3	0	0	19	0	41	0	0.0511	0.0249	0.0156	0.0644	0	0.0005	0.0003	0
27.1068	38.3458	45.275	50.5173	39.8725	31.5932	34.1207	45.4343	53.2211	57.3178	45.0989	30.8496		1.14723	2.5861			1.02585		1.93926	3.27399	2.89938	2.66175	0.735242				41.5	0	442	307	147	680	0	3	2	0	0	63	0	41.5	0	0.0442	0.0307	0.0147	0.068	0	0.0003	0.0002	0
28.2471	37.832	46.5289	50.8102	42.3584	31.9414	33.6752	44.5629	51.8765	55.5029	43.4942	29.8064		1.14811	3.18606			1.02685		1.87793	3.1394	2.9052	2.66387	0.736505				42	0	414	331	197	758	0	3	27	0	0	169	0	42	0	0.0414	0.0331	0.0197	0.0758	0	0.0003	0.0027	0
30.1252	37.9378	44.014	49.7385	37.8535	30.4207	35.5931	45.1178	50.3112	55.2435	44.6156	32.0253		1.14954	2.55545			1.02748		1.5375	2.37582	2.90832	2.66664	0.739405				42.5	0	375	356	154	805	0	0	62	0	0	299	0	42.5	0	0.0375	0.0356	0.0154	0.0805	0	0	0.0062	0
28.4597	37.8481	45.9052	46.4113	40.3929	31.8834	34.0191	43.1063	48.0499	53.0656	48.9968	31.1071		1.15	3.20079			1.03185		1.55321	2.39819	2.9172	2.66705	0.739946				43	0	303	364	210	743	0	1	112	0	0	542	0	43	0	0.0303	0.0364	0.021	0.0743	0	0.0001	0.0112	0
31.3121	38.1062	44.4953	51.4685	33.149	31.8184	35.4167	44.6464	49.5108	54.8461	46.0803	31.5642		1.15024	2.71045			1.03367		1.52206	2.32423	2.91783	2.66712	0.740871				43.5	0	285	392	208	658	0	0	190	0	0	829	0	43.5	0	0.0285	0.0392	0.0208	0.0658	0	0	0.019	0
29.4989	33.7721	37.6851	47.6795	43.5072	30.7039	34.3276	44.1333	49.9142	57.07	41.9961	31.1033		1.15086	1.86575			1.03369		1.6356	2.59985	2.92322	2.66726	0.74154				44	0	217	406	253	577	0	0	288	0	0	1059	0	44	0	0.0217	0.0406	0.0253	0.0577	0	0	0.0288	0
29.5296	36.5425	42.584	30.8811	42.6378	32.0189	35.5444	47.2231	55.1914	52.7245	44.5445	31.2126		1.15202	2.45841			1.03375		1.9216	3.23271	2.92399	2.66822	0.741565				44.5	0	181	413	266	464	0	0	335	0	0	1329	0	44.5	0	0.0181	0.0413	0.0266	0.0464	0	0	0.0335	0
30.3675	44.0027	53.1841	42.2283	44.5464	31.1616	38.1826	52.4609	63.4073	54.0134	43.3472	31.7084		1.15292	3.3157			1.03391		2.24662	3.96899	2.92428	2.66846	0.745307				45	0	130	432	308	325	0	0	452	0	0	1330	0	45	0	0.013	0.0432	0.0308	0.0325	0	0	0.0452	0
28.9849	41.0588	46.8319	53.1751	43.5916	31.5559	37.4455	47.4249	52.8381	53.3253	47.6973	31.2513		1.15371	2.39045			1.03426		1.63118	2.51601	2.92508	2.67718	0.745408				45.5	0	117	421	336	198	0	0	616	2	1	1307	0	45.5	0	0.0117	0.0421	0.0336	0.0198	0	0	0.0616	0.0002001
30.8991	36.5791	42.5521	52.5495	40.6688	32.2936	36.4795	50.9003	62.4779	61.2808	46.4035	31.9231		1.15392	2.5115			1.03496		2.29103	4.13035	2.9251	2.67839	0.746038				46	0	92	433	323	125	0	0	685	4	0	1029	0	46	0	0.0092	0.0433	0.0323	0.0125	0	0	0.0685	0.0004002
30.7727	38.9682	45.2778	43.7143	42.1654	30.3346	34.2807	46.6405	55.8227	55.2097	42.1352	31.8504		1.15397	2.56576			1.03558		2.05726	3.58562	2.9307	2.67917	0.747287				46.5	0	67	409	378	78	0	0	712	13	1	780	0	46.5	0	0.0067	0.0409	0.0378	0.0078	0	0	0.0712	0.00130065
29.324	36.9698	41.686	50.399	38.0361	30.9624	35.1347	44.9178	50.5168	56.3096	44.6413	31.8799		1.15413	2.02046			1.03615		1.66275	2.61436	2.93155	2.68145	0.747384				47	0	39	398	382	42	0	0	814	34	0	525	0	47	0	0.0039	0.0398	0.0382	0.0042	0	0	0.0814	0.0034017
29.7575	38.0897	47.4064	47.7951	33.8107	31.778	35.8235	46.0919	52.1694	55.3153	46.5062	31.9233		1.15435	3.63369			1.03659		1.70797	2.71885	2.93241	2.68157	0.748167				47.5	0	40	406	437	18	0	0	816	49	1	387	0	47.5	0	0.004	0.0406	0.0437	0.0018	0	0	0.0816	0.00490245
29.2688	40.2031	49.6044	48.6161	43.5906	31.4118	36.6135	48.1252	55.6465	53.7895	44.459	31.0714		1.15457	3.57405		0.00480457	1.03682		1.82623	3.01943	2.93449	2.68175	0.7488				48	0	27	369	427	9	0	0	754	83	2	169	0	48	0	0.0027	0.0369	0.0427	0.0009	0	0	0.0754	0.00830415
31.1042	41.8275	50.6819	49.5513	42.6079	32.3337	36.7269	47.2338	53.4385	55.1665	43.9563	31.7239		1.15586	3.38781		0.0205734	1.03702		1.71993	2.73562	2.9383	2.68348	0.748855				48.5	0	18	334	442	4	0	0	726	121	9	73	0	48.5	0	0.0018	0.0334	0.0442	0.0004	0	0	0.0726	0.0121061
32.3396	39.476	45.6013	51.1579	38.9007	30.7841	34.315	45.9343	54.0909	53.7723	43.8492	31.7764		1.157	2.59056		0.036969	1.03898		1.97148	3.35543	2.94208	2.68605	0.749239				49	0	9	288	487	0	0	0	671	174	15	40	0	49	0	0.0009	0.0288	0.0487	0	0	0	0.0671	0.0174087
26.8425	39.245	45.9373	45.3283	43.8288	31.883	33.5893	44.3785	51.5795	56.2887	45.5206	31.0279		1.15712	2.74021		0.0454301	1.04003		1.83776	3.06435	2.9423	2.68618	0.749378				49.5	0	8	320	445	0	0	0	588	224	25	16	0	49.5	0	0.0008	0.032	0.0445	0	0	0	0.0588	0.0224112
28.8548	42.4144	49.8646	44.0331	40.4094	31.2325	34.2542	46.8337	56.3295	54.9661	44.6829	31.3928		1.15717	2.8187		0.0861271	1.04637		2.13843	3.75268	2.94254	2.68642	0.752391				50	0	10	259	402	0	0	0	482	220	43	7	0	50	0	0.001	0.0259	0.0402	0	0	0	0.0482	0.022011
28.2961	40.4517	47.0962	47.7091	34.7741	30.2869	36.3571	50.8321	62.5205	56.64	44.0298	31.4652		1.15731	2.62372		0.111127	1.04694		2.4087	4.35368	2.94582	2.68872	0.752467				50.5	0	4	261	427	0	0	0	428	271	85	1	0	50.5	0	0.0004	0.0261	0.0427	0	0	0	0.0428	0.0271136
30.8663	39.7577	49.1793	51.9069	43.5069	30.4794	35.195	44.2172	48.8693	53.6616	45.5393	31.9229		1.15823	3.41729		0.116364	1.04768		1.47547	2.23626	2.94785	2.69165	0.752522				51	0	3	228	401	0	0	0	369	325	126	0	0	51	0	0.0003	0.0228	0.0401	0	0	0	0.0369	0.0325163
27.8309	41.8884	46.7482	40.2751	40.2266	30.5895	36.3048	48.0045	55.8386	57.2036	44.725	31.4927		1.1591	1.92768		0.123224	1.04898		1.93612	3.23254	2.94838	2.69207	0.753624				51.5	0	2	222	345	0	0	0	260	324	238	1	0	51.5	0	0.0002	0.0222	0.0345	0	0	0	0.026	0.0324162
30.9857	47.7735	57.3427	44.8516	40.5886	31.0491	37.9885	48.3487	54.1316	54.0065	46.282	32.1574		1.16014	3.18087		0.158324	1.05205		1.54405	2.40592	2.95417	2.69377	0.754359				52	0	0	214	310	0	0	0	191	401	327	0	0	52	0	0	0.0214	0.031	0	0	0	0.0191	0.0401201
29.8307	37.6704	44.7697	53.071	37.1108	31.3788	35.5733	47.3058	55.3399	56.2987	43.3021	30.6855		1.16062	2.90585		0.170109	1.05446		1.91349	3.22381	2.95482	2.69463	0.754695				52.5	0	0	179	275	0	0	0	142	389	415	0	0	52.5	0	0	0.0179	0.0275	0	0	0	0.0142	0.0389195
37.7697	44.047	54.0904	46.0062	29.6672	33.5087	34.0955	46.5262	55.8513	53.8875	45.7519	30.7673		1.16214	3.65173		0.17268	1.05555		2.13987	3.74512	2.95512	2.69538	0.755201				53	0	0	157	219	0	0	0	102	374	536	0	0	53	0	0	0.0157	0.0219	0	0	0	0.0102	0.0374187
30.5945	39.2246	44.8228	50.7504	30.9562	32.3104	34.1992	43.3232	48.279	54.8684	44.1319	31.8411		1.16257	2.3968		0.173653	1.05647		1.61511	2.49238	2.95719	2.69677	0.75527				53.5	0	0	134	168	0	0	0	67	434	659	0	0	53.5	0	0	0.0134	0.0168	0	0	0	0.0067	0.0434217
33.1472	34.1291	39.3159	36.2744	41.5162	31.0843	39.5866	53.9527	64.6863	53.076	45.1755	30.5166		1.16285	2.26805		0.176798	1.05743		2.12535	3.71331	2.96616	2.69698	0.756859				54	0	0	113	138	0	0	0	49	437	758	0	0	54	0	0	0.0113	0.0138	0	0	0	0.0049	0.0437219
30.8533	33.7261	37.8608	42.5574	40.1769	32.9898	33.4129	43.3447	49.4643	52.1763	44.8171	30.7562		1.16306	1.96692		0.179488	1.05763		1.70768	2.75989	2.96636	2.69807	0.758091				54.5	0	0	102	118	0	0	0	21	397	820	0	0	54.5	0	0	0.0102	0.0118	0	0	0	0.0021	0.0397199
32.855	38.2045	46.5768	49.2948	42.6463	31.0093	34.4155	47.5675	57.8365	57.6815	45.6588	31.716		1.16337	3.14555		0.180037	1.05813		2.21882	3.95123	2.96654	2.69927	0.75832				55	0	0	63	62	0	0	0	12	368	917	0	0	55	0	0	0.0063	0.0062	0	0	0	0.0012	0.0368184
30.3732	36.5862	44.9614	44.6235	40.7444	31.3449	36.3223	50.0204	60.5975	54.4633	44.925	30.9797		1.16386	3.17791		0.18495	1.05963		2.14052	3.79336	2.96673	2.7008	0.75968				55.5	0	0	73	58	0	0	0	6	372	822	0	0	55.5	0	0	0.0073	0.0058	0	0	0	0.0006	0.0372186
27.1323	43.3864	52.262	48.6576	44.6749	32.1607	36.0735	45.5733	50.6486	54.0676	42.3556	30.8527		1.16427	3.17277		0.188154	1.05965		1.58425	2.43064	2.96732	2.70122	0.760053				56	0	0	55	39	0	0	0	8	414	866	0	0	56	0	0	0.0055	0.0039	0	0	0	0.0008	0.0414207
28.5461	40.8208	47.873	44.261	40.9591	31.0569	36.5651	47.2576	53.7292	58.0947	43.9322	31.1676		1.1644	2.96685		0.198224	1.06115		1.71222	2.74854	2.96769	2.70639	0.761872				56.5	0	0	44	21	0	0	0	4	357	739	0	0	56.5	0	0	0.0044	0.0021	0	0	0	0.0004	0.0357179
28.8142	39.2787	44.4936	50.0137	42.5576	32.9053	35.4958	44.9782	50.1372	54.3147	44.0373	31.1054		1.16449	2.25799		0.213712	1.06137		1.5691	2.42281	2.97203	2.70753	0.76431				57	0	0	39	16	0	0	0	2	328	672	0	0	57	0	0	0.0039	0.0016	0	0	0	0.0002	0.0328164
27.9765	43.5653	51.4858	51.5146	38.0606	31.18	35.2928	46.951	54.9462	54.039	46.7432	30.4503		1.16479	2.84599		0.218734	1.06623		1.97211	3.32459	2.97238	2.71055	0.764317				57.5	0	0	40	7	0	0	0	1	350	510	0	0	57.5	0	0	0.004	0.0007	0	0	0	0.0001	0.0350175
34.8608	36.6994	40.5986	45.9961	38.6562	29.92	35.6094	46.7991	54.1058	54.0243	42.8912	31.558		1.16483	1.90668		0.23572	1.0675		1.85308	3.06312	2.97293	2.71222	0.765927				58	0	0	18	11	0	0	0	0	339	461	0	0	58	0	0	0.0018	0.0011	0	0	0	0	0.033917
27.6376	38.1539	42.4407	49.267	42.8286	31.3117	38.2888	48.6417	54.3599	58.1731	46.8805	31.2004		1.16536	1.98453		0.236933	1.06874		1.64248	2.54969	2.97301	2.71357	0.766277				58.5	0	0	18	5	0	0	0	2	327	327	0	0	58.5	0	0	0.0018	0.0005	0	0	0	0.0002	0.0327164
30.015	41.4212	49.0112	46.0797	43.5045	30.8177	36.1831	46.4448	52.4449	57.6855	43.8123	31.3		1.16576	2.74654		0.257577	1.06881		1.73322	2.74663	2.97306	2.71424	0.766779				59	0	0	13	2	0	0	0	1	334	238	0	0	59	0	0	0.0013	0.0002	0	0	0	0.0001	0.0334167
28.1865	38.946	47.2443	50.5906	42.6829	30.9152	34.0374	43.2787	48.409	56.612	45.965	30.9826		1.16642	3.11347		0.267116	1.0689		1.56131	2.42807	2.97358	2.71504	0.766916				59.5	0	0	11	2	0	0	0	0	325	140	0	0	59.5	0	0	0.0011	0.0002	0	0	0	0	0.0325163
28.1959	41.3511	50.7914	47.2374	47.0554	31.224	36.0327	48.1478	56.5965	51.9121	45.1836	31.7554		1.16661	3.20351		0.268001	1.07207		1.98113	3.36273	2.97465	2.71539	0.768178				60	0	0	6	0	0	0	0	0	259	87	0	0	60	0	0	0.0006	0	0	0	0	0	0.025913
30.5294	37.8233	46.3765	46.1439	42.347	32.1019	34.9964	46.9786	55.4766	51.7699	43.4395	31.3979		1.16722	3.30902		0.282193	1.07342		2.05631	3.5147	2.97706	2.71621	0.770166				60.5	0	0	11	0	0	0	0	0	308	65	0	0	60.5	0	0	0.0011	0	0	0	0	0	0.0308154
27.604	36.9563	42.847	55.2334	42.7212	31.099	36.9378	48.4747	55.9621	53.1517	43.3902	31.7919		1.1675	2.46592		0.292487	1.07618		1.89413	3.12339	2.97832	2.71677	0.770913				61	0	0	3	0	0	0	0	0	274	42	0	0	61	0	0	0.0003	0	0	0	0	0	0.0274137
25.6728	35.954	40.7719	48.7104	42.0261	29.8247	36.355	46.4143	52.1282	59.3398	47.238	32.3556		1.16766	2.15755		0.300107	1.07683		1.63394	2.56206	2.98117	2.71711	0.771495				61.5	0	0	5	0	0	0	0	0	242	31	0	0	61.5	0	0	0.0005	0	0	0	0	0	0.0242121
28.1985	37.9833	45.9695	37.2234	41.0907	31.7385	36.788	50.9024	61.9591	55.8392	46.297	30.2825		1.16782	3.22497		0.308826	1.07726		2.322	4.14096	2.98282	2.7185	0.771857				62	0	0	1	0	0	0	0	0	204	9	0	0	62	0	0	0.0001	0	0	0	0	0	0.0204102
31.7081	39.8084	45.7006	50.3129	43.3875	31.9867	35.954	48.0229	56.4266	54.7939	44.8835	30.5947		1.16801	2.4182		0.318807	1.08054		1.97183	3.34484	2.98375	2.72028	0.773003				62.5	0	0	1	0	0	0	0	0	183	6	0	0	62.5	0	0	0.0001	0	0	0	0	0	0.0183092
26.7976	31.153	35.2801	45.6155	43.478	31.5127	34.754	46.3518	54.3828	52.8885	43.573	32.3038		1.16823	1.97254		0.320201	1.08257		1.92082	3.25092	2.98462	2.72033	0.77347				63	0	0	2	0	0	0	0	0	167	5	0	0	63	0	0	0.0002	0	0	0	0	0	0.0167084
28.4191	40.6301	48.5307	47.1085	42.1256	31.1822	36.035	49.295	59.3221	55.6001	46.6289	33.6625		1.16874	3.0725		0.334726	1.08372		2.19234	3.85016	2.98512	2.72142	0.773542				63.5	0	0	2	0	0	0	0	0	134	0	0	0	63.5	0	0	0.0002	0	0	0	0	0	0.0134067
30.3856	35.2124	40.1261	48.0498	42.1784	32.0044	35.8051	50.3006	62.1637	52.9672	45.1208	29.6205		1.16876	2.23179		0.348159	1.0849		2.37334	4.31566	2.98547	2.72386	0.77355				64	0	0	0	0	0	0	0	0	115	1	0	0	64	0	0	0	0	0	0	0	0	0.0115058
29.2405	34.7907	40.1909	50.1065	36.462	31.8907	35.2111	49.7799	61.9102	57.232	46.2928	32.2419		1.16881	2.44362		0.355679	1.08591		2.38968	4.37939	2.98568	2.72423	0.774325				64.5	0	0	0	0	0	0	0	0	106	0	0	0	64.5	0	0	0	0	0	0	0	0	0.0106053
30.9854	41.5969	50.0087	35.6507	43.9211	31.1939	35.9563	46.0423	51.8648	55.7323	43.0248	30.8687		1.16991	3.22693		0.380125	1.08846		1.7219	2.71593	2.98647	2.72482	0.77599				65	0	0	0	0	0	0	0	0	59	0	0	0	65	0	0	0	0	0	0	0	0	0.00590295
27.53	44.8794	53.122	49.4021	42.1612	31.1158	37.088	48.724	56.3102	60.6631	44.2395	29.9888		1.17012	2.97118		0.382021	1.08882		1.83815	3.03654	2.987	2.72529	0.776666				65.5	0	0	0	0	0	0	0	0	44	0	0	0	65.5	0	0	0	0	0	0	0	0	0.0044022
27.2485	42.6085	52.6113	54.0175	42.2492	31.7776	38.2664	48.2514	53.5225	51.721	45.6926	30.8163		1.17022	3.54352		0.388309	1.09082		1.54034	2.35349	2.98806	2.72671	0.777171				66	0	0	0	0	0	0	0	0	33	0	0	0	66	0	0	0	0	0	0	0	0	0.00330165
28.4819	39.9645	48.3009	47.73	42.9963	31.6668	33.9167	42.9	47.7348	58.3261	46.0135	30.919		1.17031	3.10477		0.394763	1.09122		1.52291	2.34253	2.98847	2.72954	0.777749				66.5	0	0	0	0	0	0	0	0	35	0	0	0	66.5	0	0	0	0	0	0	0	0	0.00350175
32.1133	38.5299	44.9556	47.8714	43.7411	31.8137	34.673	48.683	60.1309	53.4611	44.7859	29.5421		1.17033	2.48078		0.396842	1.09218		2.308	4.19392	2.99042	2.73062	0.779404				67	0	0	0	0	0	0	0	0	12	0	0	0	67	0	0	0	0	0	0	0	0	0.0012006
27.0977	41.6565	47.68	46.7201	40.9665	31.0141	37.5221	48.7793	55.7851	51.1019	44.1099	31.3899		1.17095	2.36457		0.403354	1.09285		1.79734	2.91589	2.99167	2.73222	0.783288				67.5	0	0	0	0	0	0	0	0	9	0	0	0	67.5	0	0	0	0	0	0	0	0	0.00090045
30.8273	41.616	49.5536	33.2395	39.9216	31.2199	36.9268	51.0081	61.9828	53.4865	46.0133	31.7326		1.17097	3.03158		0.40572	1.09364		2.28156	4.05976	2.99179	2.73297	0.784278				68	0	0	0	0	0	0	0	0	11	0	0	0	68	0	0	0	0	0	0	0	0	0.00110055
32.0889	35.2783	39.4269	37.4538	39.7984	31.297	35.4461	45.8244	52.1146	50.5689	44.5501	33.071		1.17186	1.86789		0.40586	1.09459		1.74283	2.79914	2.99194	2.73422	0.784406				68.5	0	0	0	0	0	0	0	0	4	0	0	0	68.5	0	0	0	0	0	0	0	0	0.0004002
31.3222	36.0078	41.0726	49.6981	29.4518	30.5019	32.4691	44.6049	53.905	58.3406	45.1804	31.4734		1.17192	2.17204		0.410138	1.09473		2.11119	3.72907	2.99623	2.73545	0.784456				69	0	0	0	0	0	0	0	0	3	0	0	0	69	0	0	0	0	0	0	0	0	0.00030015
28.483	36.2617	41.749	46.3159	39.4378	30.872	36.4995	47.4482	54.2608	54.806	45.8763	30.6535		1.17194	2.35928		0.423024	1.09505		1.85285	3.00575	2.99745	2.73605	0.787343				69.5	0	0	0	0	0	0	0	0	2	0	0	0	69.5	0	0	0	0	0	0	0	0	0.0002001
25.1126	41.9381	50.6596	38.4701	43.188	31.0998	35.8405	49.0832	59.1323	50.4011	44.7438	30.9235		1.17206	3.30428		0.433047	1.09581		2.12686	3.74084	2.99843	2.73629	0.787485				70	0	0	0	0	0	0	0	0	1	0	0	0	70	0	0	0	0	0	0	0	0	0.00010005
28.8278	38.0901	44.9529	41.2234	38.1917	30.7565	36.8281	48.508	56.206	55.6579	43.8906	30.0982		1.17247	2.82451		0.437139	1.09585		1.80138	2.98863	3	2.73635	0.787572					10000	10000	10000	10000	10000	10000	10000	10000	9995	10000	10000	10000
30.3467	33.8843	39.9027	50.5961	43.7381	31.7175	36.0719	45.2894	50.0218	51.8672	44.7941	30.3967		1.1725	2.56737		0.441469	1.09637		1.56792	2.37289	3.00051	2.73739	0.787657																		29.4623	39.267	46.0587	46.1911	40.4824	31.4914	35.7318	47.5648	55.767
27.6604	39.9311	44.8652	39.782	40.6464	32.0478	34.7235	44.4277	50.0055	55.6267	42.9837	31.7095		1.17262	2.06794		0.4419	1.09738		1.64476	2.59014	3.00073	2.73776	0.791274																	0.05	26.2397	34.3935	39.0188	35.4906	33.0923	30.2731	33.6074	43.7105	49.0631
26.5936	39.1371	43.7034	45.9596	1.39094	31.4898	35.8378	47.9332	56.3984	53.1007	45.3437	31.5261		1.17293	2.00204		0.464524	1.09768		1.99512	3.39143	3.00268	2.73809	0.791281																	0.95	33.1945	44.7492	54.0392	53.4353	44.9576	32.7041	38.1645	51.7704	63.2724
28.6313	33.8397	39.4788	37.3959	33.7591	32.1804	36.5003	49.3109	58.6035	53.3072	45.6408	30.7671		1.17315	2.31993		0.473761	1.09832		2.10867	3.63827	3.00312	2.7381	0.791307
27.5228	32.4366	36.9378	47.4109	40.3941	31.6001	35.8339	50.5595	62.7546	54.19	41.6109	31.9849		1.17325	2.08546		0.48762	1.09867		2.46615	4.50851	3.00402	2.73998	0.791326
30.988	35.763	41.0238	50.8148	44.5778	31.2987	38.6017	52.6411	63.1505	53.5247	44.8071	32.2739		1.17432	2.3358		0.492484	1.09974		2.14465	3.75006	3.00473	2.74029	0.792181
34.0592	39.5805	46.6534	50.9304	40.7034	32.0261	34.4296	43.4791	48.3017	53.221	44.2958	31.8591		1.17452	2.61003		0.494652	1.10069		1.56353	2.39677	3.00504	2.74197	0.793544
35.2041	44.3377	54.0802	45.6336	38.1494	31.1264	34.3925	47.3446	57.334	54.2181	43.982	30.2481		1.17536	3.48177		0.50602	1.10178		2.22588	3.9426	3.00512	2.74258	0.793687
30.1147	46.2451	54.7242	32.077	41.3468	32.1903	36.544	47.8205	55.0486	55.8074	44.5102	30.9526		1.17557	2.82401		0.508206	1.10189		1.87254	3.07282	3.00569	2.74432	0.79404
29.404	42.9407	52.5743	46.7615	37.868	32.9052	34.2038	48.2	59.7522	54.8972	43.9874	32.252		1.17569	3.70098		0.510406	1.10301		2.40041	4.38166	3.00594	2.74539	0.794856
27.6391	41.1854	51.0172	51.0345	42.3982	31.8956	35.6054	46.4016	53.1965	54.033	45.6532	31.2308		1.17575	3.62809		0.510642	1.10305		1.77815	2.8973	3.00596	2.74638	0.795403
27.8823	38.4603	46.3172	51.8612	38.3723	31.0069	36.3559	48.4205	56.7307	54.4264	45.0032	31.1332		1.17593	2.79111		0.512546	1.10345		1.95956	3.30931	3.00726	2.74822	0.79619
30.1561	37.8429	44.0512	49.0518	38.9369	31.2167	34.3162	46.334	55.0343	51.1954	43.9758	31.7132		1.17595	2.51243		0.515812	1.10361		2.01737	3.47787	3.00927	2.74842	0.79631
26.2375	40.0036	45.6597	45.548	41.0655	31.9687	34.6828	47.6771	57.6555	53.9536	46.2415	31.111		1.176	2.46997		0.524276	1.1045		2.19641	3.88304	3.01079	2.74851	0.797079
29.4651	40.6554	49.7861	47.0273	42.4944	31.0645	36.8707	47.9449	54.845	54.1433	45.7218	30.2256		1.17609	3.18007		0.524808	1.10464		1.73921	2.82289	3.01152	2.74908	0.79945
30.5934	36.1815	41.0446	51.078	26.8376	31.2935	39.008	53.0779	63.5342	56.4773	45.6268	31.5933		1.17617	2.13868		0.528622	1.10641		2.14993	3.7477	3.01191	2.75039	0.799584
27.0781	39.7467	45.2614	38.6033	46.307	29.8943	36.0574	50.6652	62.6266	57.8647	45.0822	31.6679		1.17643	2.22393		0.532171	1.10705		2.43818	4.43466	3.01236	2.75065	0.800536
26.5611	41.6145	46.8728	46.6782	44.8829	31.8611	35.812	50.4075	62.416	50.8795	45.3099	30.5406		1.17684	2.08539		0.545772	1.10774		2.45206	4.4695	3.01247	2.75187	0.800587
30.9156	35.4199	43.4416	51.6886	42.7887	31.117	36.0215	48.6522	57.8067	54.5286	46.0861	32.0776		1.17686	3.15298		0.553455	1.11045		2.05669	3.54734	3.01333	2.7522	0.800953
28.9851	43.02	52.9928	48.0457	43.9283	31.1384	37.1554	51.2432	62.1706	53.2089	44.6304	32.2339		1.17728	3.51181		0.57087	1.11047		2.23732	3.97272	3.01365	2.7534	0.801048
33.1486	40.4264	47.5903	52.1242	39.5022	30.214	34.3146	45.6289	53.3747	55.7801	44.472	31.977		1.17729	2.77702		0.576311	1.11161		1.89604	3.19407	3.01576	2.75576	0.801441
27.9998	39.2263	43.9835	41.7956	33.9117	30.8593	35.2383	47.5724	56.4975	55.7391	42.357	31.0896		1.17761	2.08543		0.579835	1.11319		2.0511	3.53531	3.01663	2.75693	0.801456
25.8931	35.9976	40.1518	48.6954	36.4436	30.6527	35.2903	48.3289	58.2229	54.365	44.3108	32.3328		1.17769	1.90501		0.589346	1.11332		2.19888	3.86742	3.01767	2.75732	0.803124
25.6518	43.166	49.1404	53.3036	41.4162	32.2726	38.6477	49.4323	55.6201	52.0831	42.151	31.6105		1.17784	2.50367		0.590382	1.11364		1.67104	2.62983	3.0199	2.7591	0.80592
30.7762	36.715	45.331	45.2263	41.4869	31.7204	34.777	45.7236	52.8837	56.1306	44.2629	32.3845		1.17791	3.33067		0.598646	1.11396		1.8615	3.0791	3.01997	2.75992	0.806037
31.7396	40.9408	47.7937	52.7539	39.8339	30.7057	36.039	47.5236	55.129	54.4364	45.0923	31.3112		1.17792	2.73069		0.627529	1.11475		1.90442	3.16558	3.02147	2.76019	0.806656
28.2627	33.2767	36.8248	45.8412	39.3929	31.5433	34.4174	44.1753	49.8789	56.4061	45.3296	31.7278		1.17881	1.87276		0.628583	1.11481		1.61346	2.55651	3.02193	2.76128	0.806656
30.1593	34.7183	40.873	52.8058	41.4835	29.8229	34.4038	44.5927	50.8459	54.1054	42.7533	32.2115		1.17881	2.66388		0.649079	1.1166		1.76451	2.84743	3.02268	2.76211	0.807448
30.2434	35.9618	43.4109	47.5689	45.337	32.6286	33.8472	46.801	56.9275	56.8119	48.498	31.4428		1.17895	2.97979		0.656732	1.11825		2.27313	4.05011	3.0249	2.7625	0.808628
33.0303	39.3304	44.2964	37.5584	43.8993	31.5363	35.6555	49.3838	60.1695	58.0764	43.986	31.97		1.1791	2.07857		0.668812	1.11873		2.2306	3.9831	3.02515	2.76329	0.80909
29.3909	38.5729	45.9347	40.3361	27.8834	31.2769	36.1287	50.1529	61.2454	59.2845	44.9387	31.1504		1.17922	2.81433		0.670115	1.119		2.30059	4.12025	3.02629	2.76372	0.809377
29.0667	46.612	56.1139	51.8972	38.8436	32.134	38.8034	53.2376	64.2541	54.6974	41.3412	31.5257		1.17978	3.20929		0.673815	1.11936		2.25266	3.97195	3.02824	2.76405	0.809989
26.8086	44.4185	53.1679	51.7246	22.0538	31.7434	34.8944	44.2355	49.3312	54.007	45.7706	31.8576		1.17999	3.13775		0.681497	1.12006		1.50626	2.32793	3.02906	2.76414	0.810427
27.1314	43.4382	52.2696	40.098	45.5658	31.5466	37.4614	50.9002	60.8399	59.5036	46.2265	31.4246		1.18002	3.11778		0.690547	1.1207		2.13688	3.71738	3.02927	2.7648	0.810468
29.192	36.9871	44.8408	37.6645	42.0946	31.7373	34.0127	44.9363	52.226	56.5827	44.7903	30.9549		1.18028	3.0171		0.694115	1.12139		1.9067	3.17913	3.0296	2.76652	0.81073
25.4476	42.4071	52.3906	53.7084	38.1365	31.767	33.9451	47.1499	57.6129	55.7925	42.6257	31.4834		1.18035	3.51193		0.695106	1.12144		2.20986	3.96085	3.02981	2.76683	0.81101
29.6536	37.8103	43.3049	53.4185	40.3958	31.1537	35.9659	50.2971	61.8771	51.6827	43.9422	32.3594		1.18043	2.38038		0.695622	1.12168		2.35741	4.26224	3.03107	2.76703	0.811209
27.8891	35.3321	39.1958	42.9231	42.7719	31.7382	35.9652	47.3586	54.8592	52.8797	43.3504	32.3789		1.18051	1.83404		0.700683	1.12288		1.8797	3.11716	3.03143	2.7675	0.812635
30.7273	35.5332	40.5522	52.5607	44.4012	31.2151	36.2628	47.8495	55.5427	57.4519	45.5051	32.5362		1.18076	2.24386		0.701058	1.12401		1.9322	3.21513	3.03235	2.76784	0.813748
30.0959	46.0002	56.3702	43.6833	39.4667	31.3782	34.4705	44.1537	49.7532	56.8138	45.0269	31.2162		1.1808	3.56608		0.703233	1.12445		1.62496	2.56463	3.03281	2.76807	0.813984
28.9171	43.2298	50.6384	43.953	42.2109	32.3635	34.5322	48.047	58.8087	55.5813	43.6781	33.0584		1.1809	2.61265		0.705583	1.12516		2.2509	4.04328	3.03484	2.76832	0.814967
25.9464	37.5249	45.9231	48.7732	40.8795	32.2504	35.3474	50.0071	62.2359	50.7787	42.8407	31.8003		1.18098	3.11409		0.716232	1.12639		2.44023	4.47579	3.03667	2.76944	0.816217
27.2276	40.7931	45.914	52.7368	42.7032	30.7324	35.1988	49.1302	60.3259	53.9611	44.8123	31.4681		1.18141	2.23849		0.720044	1.12665		2.28915	4.12878	3.03669	2.77235	0.817323
29.0145	38.4456	47.1029	48.2027	39.9077	32.3776	36.8969	50.0279	59.6717	58.5201	44.2846	31.2973		1.18142	3.21015		0.724184	1.12681		2.11515	3.66859	3.03784	2.77245	0.817511
27.9189	34.4433	38.8513	48.1089	43.636	29.9146	35.9521	48.2142	56.8802	59.3932	43.061	32.2173		1.182	2.05202		0.728058	1.12768		2.02418	3.45471	3.0442	2.77247	0.817763
27.0659	35.209	39.2713	47.8253	41.0754	32.1861	37.3225	52.536	65.0545	56.3762	44.6197	31.4555		1.18211	2.1196		0.72863	1.12817		2.35037	4.28439	3.04463	2.77303	0.818092
31.148	34.2794	37.8459	46.7265	31.3145	31.5413	36.9418	48.1978	55.3184	55.5202	45.1878	30.863		1.18222	1.839		0.736634	1.12839		1.78219	2.90962	3.04662	2.77325	0.819274
32.002	39.2003	45.9649	50.4508	40.5428	32.701	35.8513	46.505	53.0675	51.7938	49.564	30.3967		1.1823	2.90419		0.73669	1.12899		1.8169	2.93609	3.04802	2.77338	0.819743
30.0815	46.7252	55.7031	46.4095	37.5537	32.052	35.8446	45.0994	49.9173	54.1517	43.2369	32.2708		1.18238	3.04688		0.740511	1.13054		1.51422	2.30251	3.04862	2.77425	0.820025
31.1913	36.274	40.78	42.9591	41.3406	30.3345	37.3264	49.5983	57.9763	53.1344	44.0336	30.6785		1.18256	2.09326		0.758121	1.13083		1.99831	3.36256	3.05321	2.77448	0.820333
27.802	37.672	44.9692	56.271	39.2284	31.4232	33.4992	42.8495	48.2159	53.7222	44.6679	29.3976		1.18282	2.8994		0.75952	1.13107		1.62966	2.56498	3.05416	2.77547	0.821269
28.5826	38.2076	46.0038	51.5885	41.4942	33.2655	34.2269	46.2848	55.0608	56.7678	44.5564	30.3533		1.18298	3.10385		0.771617	1.13109		2.12364	3.66928	3.05427	2.77594	0.82169
27.3659	37.568	44.173	44.5205	43.402	31.6269	34.9834	48.5776	59.3395	52.6726	45.495	30.1322		1.18304	2.77879		0.772752	1.13203		2.34059	4.19353	3.05444	2.77599	0.822848
28.886	38.4977	44.1013	47.7868	41.6249	30.1318	33.2203	46.6587	57.6497	56.5456	43.9254	31.9018		1.18308	2.21871		0.774719	1.1323		2.32296	4.22284	3.05517	2.77736	0.823117
30.1374	40.5023	47.2895	48.8569	43.4344	31.2563	33.4941	45.6304	54.6857	58.4221	43.6222	31.1833		1.18353	2.70949		0.784944	1.1329		2.08513	3.64093	3.05572	2.77739	0.823445
29.7507	38.1496	44.111	38.8308	44.03	31.7303	37.1084	51.7991	63.6072	54.7609	45.8716	31.3889		1.18367	2.57418		0.787982	1.13385		2.26956	4.0938	3.05592	2.77864	0.823657
27.922	39.5995	47.5506	56.7961	39.8302	30.7766	37.7096	47.3157	52.2267	53.768	44.1734	32.6001		1.1839	2.84896		0.798555	1.13401		1.54042	2.32795	3.05606	2.77865	0.824225
28.626	39.3584	45.8069	52.0334	35.6634	31.7177	35.0554	46.6887	54.7019	57.1112	46.1056	32.565		1.18403	2.35388		0.803373	1.13429		1.96665	3.32132	3.05666	2.7789	0.824594
28.6401	37.8266	41.844	47.4392	38.9425	30.3698	35.6635	45.3884	50.8159	55.5577	44.6025	29.6015		1.18413	1.95879		0.807138	1.1353		1.5822	2.46523	3.05758	2.77945	0.82595
27.8939	41.2087	48.6357	44.9835	39.065	32.2155	34.4162	47.7413	58.2586	55.9153	45.277	30.8782		1.18417	2.92503		0.815095	1.13543		2.24399	4.01513	3.05863	2.78006	0.826142
31.7735	37.0855	42.8268	37.9752	40.4839	30.9478	34.1649	44.6087	51.238	57.3766	43.7113	31.0097		1.18418	2.46391		0.828643	1.13552		1.75494	2.86892	3.05874	2.78164	0.826206
27.4671	37.6489	43.7734	22.8099	42.2666	31.5411	38.0747	52.1516	62.8396	54.7736	43.9844	31.702		1.18446	2.52466		0.85073	1.13577		2.22615	3.91637	3.06102	2.78282	0.826595
27.5491	33.6391	38.6106	46.9579	33.7289	29.8982	36.9301	48.9758	57.137	54.646	43.0471	31.9446		1.18501	2.28338		0.852977	1.13667		1.99672	3.34952	3.06129	2.78327	0.827736
27.6669	38.4311	44.4387	51.7768	43.6958	32.5551	36.4707	46.4092	51.9517	54.1783	44.7084	31.6668		1.18531	2.60071		0.86957	1.13762		1.59402	2.48295	3.06271	2.78365	0.828631
29.4915	41.4992	46.4957	54.1009	36.7401	32.476	34.8644	46.6889	55.0023	50.8648	45.6864	32.5686		1.18551	2.18584		0.870677	1.13767		2.00574	3.41589	3.06302	2.7863	0.828757
34.1823	37.149	44.5831	51.6881	41.7686	30.4173	37.5386	49.8906	58.3303	56.7464	44.0435	31.9424		1.18592	2.92062		0.873676	1.13921		1.89644	3.19221	3.06341	2.78702	0.828823
28.0899	37.2426	43.119	45.2684	47.5143	32.1284	35.8945	46.1693	52.2412	56.5631	43.5007	30.8556		1.18595	2.41488		0.900296	1.14066		1.66472	2.64848	3.06372	2.7889	0.829386
27.035	35.9148	40.3514	51.3658	41.4657	32.4948	34.9037	45.547	52.2856	55.1606	47.1544	29.8032		1.18605	2.07154		0.904203	1.14082		1.7928	2.92788	3.06451	2.78957	0.830678
27.4937	37.2306	42.4338	43.522	45.1075	31.6755	33.4499	46.5361	56.9533	59.2652	44.0637	32.0174		1.18608	2.29346		0.907693	1.1417		2.2527	4.04595	3.06587	2.78984	0.83082
26.2733	39.5014	47.2834	44.4718	42.7521	30.9798	31.5657	43.281	52.2051	54.2433	43.3847	31.7897		1.1861	2.85673		0.908565	1.14192		2.1279	3.74884	3.06699	2.79092	0.830908
27.1203	34.4217	38.8007	48.2076	45.2632	32.0411	34.9441	45.8464	52.9141	56.2654	43.2634	31.3605		1.18649	2.00701		0.911851	1.14233		1.82611	3.00993	3.067	2.79098	0.831497
25.2991	42.3967	51.2151	53.609	39.4146	32.6615	34.2871	44.8927	51.7076	57.9164	44.9932	30.389		1.18665	3.47261		0.917084	1.14256		1.78394	2.93026	3.06851	2.79117	0.83187
32.0187	39.9761	49.345	49.6012	40.0767	31.2673	36.6579	48.3883	56.1884	55.1388	43.6882	31.6888		1.18671	3.49721		0.923787	1.14257		1.81983	3.02994	3.06873	2.79212	0.832171
31.2657	41.284	46.2364	51.4736	44.8222	32.3762	36.9792	51.408	62.8693	55.2318	45.1506	31.0086		1.18678	2.17256		0.92476	1.1426		2.31683	4.15715	3.06907	2.79318	0.832624
29.0275	37.9927	42.9918	44.112	40.7997	31.8746	36.0964	49.3537	59.3622	52.2551	44.1691	31.0222		1.1868	2.19629		0.925595	1.14351		2.11081	3.70435	3.06938	2.7945	0.832672
31.957	39.2501	45.3938	40.5543	35.4792	31.7568	34.2363	45.0818	52.2217	50.8998	44.1938	31.0308		1.18687	2.52341		0.925974	1.14426		1.81485	3.0096	3.07038	2.79527	0.833018
27.9953	44.3531	54.5012	51.2842	41.8522	31.9615	37.5841	53.0735	65.9304	52.7107	46.236	31.21		1.18688	3.53634		0.928776	1.14517		2.46556	4.51208	3.07131	2.79559	0.833776
31.4867	41.7507	46.3178	49.895	44.195	32.5188	35.0475	44.614	49.9597	55.8506	45.8116	31.2872		1.18746	2.00861		0.929559	1.14588		1.57158	2.44976	3.07215	2.79607	0.834235
29.1351	35.7408	39.6992	26.1296	42.8999	32.128	35.2282	45.4365	51.5529	53.1735	43.5833	32.6622		1.18752	1.78416		0.929653	1.14632		1.69979	2.71824	3.07305	2.79753	0.834689
29.7241	35.2726	39.694	52.8549	37.4157	30.8826	38.9558	51.0938	58.952	53.6454	45.3531	31.8849		1.18798	2.155		0.932762	1.14683		1.86155	3.06672	3.07317	2.79763	0.834915
26.9795	45.4156	51.7843	50.1783	42.4484	31.8546	35.6084	50.1481	62.1286	53.5738	41.6267	31.5723		1.18855	2.46862		0.934415	1.14725		2.35526	4.29596	3.07342	2.79768	0.835263
27.0122	36.3374	40.3095	51.2998	40.7307	32.1329	35.023	47.3706	56.3635	56.4136	47.5969	31.8307		1.18858	1.88381		0.93547	1.14731		2.06944	3.57665	3.07349	2.79925	0.835362
25.6571	39.0162	45.3135	50.1928	38.1472	30.7577	36.7573	49.6108	58.9038	56.6938	44.3646	31.7476		1.18874	2.83955		0.943752	1.14824		2.10359	3.62447	3.07416	2.79983	0.835796
30.4652	36.4941	40.3069	50.8073	41.5183	32.5077	35.9294	49.1651	59.1832	58.1613	44.7076	31.7276		1.18892	1.91309		0.945765	1.14842		2.17006	3.81258	3.07434	2.80175	0.836093
29.6057	44.4423	53.3063	43.8642	43.015	30.6345	36.8766	47.1916	53.1268	51.6037	46.1364	32.1071		1.18911	3.19217		0.949715	1.14892		1.59167	2.5075	3.07624	2.80242	0.836637
30.2756	36.8628	43.0801	41.7079	44.1408	31.4388	36.1656	47.2222	54.2415	51.7944	46.6158	30.9615		1.1893	2.50685		0.956036	1.14962		1.79896	2.94103	3.07635	2.80267	0.83916
30.385	41.8028	50.9744	34.0651	39.5509	32.4603	35.2462	46.5322	54.0416	52.2098	46.8088	30.9176		1.18975	3.24142		0.958322	1.14973		1.90332	3.16975	3.07654	2.80287	0.839185
31.5304	43.4413	53.8524	52.4932	42.4234	32.4285	36.9501	51.0798	62.1179	58.6754	42.8913	29.8293		1.19001	3.73954		0.967854	1.15008		2.29585	4.08936	3.07773	2.80393	0.839206
30.5499	40.7948	48.9146	43.5925	43.9637	32.3593	36.7906	47.1298	53.1115	57.6166	43.804	29.8875		1.1901	2.84844		0.976186	1.15031		1.65914	2.61903	3.07812	2.80437	0.839421
28.4345	36.7338	42.6611	42.6886	41.4634	31.7332	35.6879	45.233	50.434	54.9226	43.8015	30.2309		1.1904	2.46908		0.990883	1.15073		1.5643	2.41667	3.0789	2.80498	0.839532
28.7297	38.2522	46.0789	49.2891	46.0137	31.9102	37.3784	48.2942	54.8913	55.895	42.5519	31.4855		1.1908	3.17018		1.00608	1.15149		1.74727	2.80326	3.07982	2.80503	0.839567
26.8864	43.6951	48.9769	49.2124	35.5717	32.7735	35.3672	48.9656	59.637	54.5615	43.9856	32.303		1.19114	2.2355		1.00805	1.15181		2.2871	4.08191	3.08175	2.80562	0.839628
28.4339	41.9434	51.8824	40.9169	39.7445	31.5012	35.5737	49.6898	61.0577	56.7014	44.1677	32.4014		1.19119	3.47224		1.01088	1.15208		2.338	4.22082	3.08216	2.80594	0.839845
25.582	40.109	46.9737	45.9227	38.7639	29.4688	36.2037	49.533	59.6171	57.5832	46.4814	32.5535		1.19125	2.7411		1.01406	1.15365		2.22204	3.90308	3.08637	2.80762	0.83998
26.6415	34.7873	39.2279	38.5354	44.4107	32.4391	36.3389	50.1839	60.9665	56.8538	44.16	31.8696		1.19138	1.98633		1.01495	1.15386		2.19918	3.91192	3.08873	2.80868	0.840198
29.1836	44.9661	52.8806	45.1254	38.6721	31.4823	36.0544	48.4198	57.2033	57.564	44.0713	32.1432		1.19141	2.87461		1.01894	1.15448		2.07485	3.5487	3.09023	2.80874	0.840209
27.3831	40.6851	48.4097	47.6856	41.4805	32.8638	36.1656	46.5917	52.8028	52.0909	44.1321	31.988		1.19166	3.09117		1.02186	1.15449		1.72897	2.75895	3.09053	2.80911	0.840512
31.0151	40.5559	50.2142	-5.42303	37.4876	32.1819	34.612	44.622	50.6064	57.7052	44.5536	32.342		1.19308	3.44921		1.02257	1.15481		1.71362	2.73809	3.0906	2.80957	0.841168
31.9268	36.8942	41.4267	50.8212	41.8412	31.364	37.8882	53.3013	65.9638	56.4917	45.1248	31.1012		1.19319	2.00287		1.0241	1.155		2.43977	4.44415	3.09094	2.80961	0.84168
29.906	41.3296	50.5026	44.5162	41.7408	32.2359	35.248	49.807	61.9126	53.1572	42.9334	31.3844		1.19329	3.50925		1.02565	1.15531		2.43614	4.46179	3.0914	2.81043	0.842254
28.2055	41.3808	49.5372	51.0033	45.1947	32.7071	35.1485	47.7914	57.1645	54.2364	42.9959	31.2962		1.1933	3.09531		1.02699	1.1557		2.17959	3.79549	3.09202	2.81061	0.843969
28.3932	39.7651	44.589	47.3789	42.4069	30.4021	39.0906	54.1829	66.0672	53.3582	41.4744	32.6757		1.19347	1.992		1.02942	1.15571		2.34026	4.18309	3.09257	2.81132	0.845821
32.3291	39.4425	46.7096	45.2989	39.083	32.087	33.5283	43.8983	50.5614	53.5409	45.1041	31.3889		1.19359	2.88933		1.03105	1.15688		1.80017	2.95684	3.09272	2.81222	0.845863
28.7635	47.4823	57.0311	40.4027	46.9634	31.8722	35.0942	45.05	50.8733	58.5628	43.911	30.2729		1.19437	3.46513		1.03711	1.15702		1.69798	2.69113	3.09444	2.81233	0.846271
29.5863	43.0114	52.7168	52.0502	40.8661	31.8728	32.209	41.8217	47.7706	57.3263	45.1337	30.7638		1.19454	3.43895		1.03761	1.15709		1.73614	2.81056	3.09567	2.81247	0.846342
30.8256	38.2898	46.8992	46.3032	39.4552	31.3878	34.6976	44.1627	49.4478	55.689	44.8298	32.4854		1.19455	3.36714		1.03873	1.15789		1.57207	2.44987	3.09907	2.81306	0.846584
27.1545	39.505	47.7975	49.212	44.7214	32.0685	37.3594	51.9907	63.6481	53.6473	48.5032	29.9604		1.19465	2.9845		1.05183	1.15795		2.29639	4.12603	3.09908	2.81326	0.846604
30.6235	39.5737	47.1889	54.4149	30.3679	31.0328	35.5721	45.4993	51.1957	56.4056	45.4802	31.4489		1.19469	2.85584		1.05199	1.15824		1.64552	2.58975	3.10005	2.81341	0.847219
31.8946	34.5274	41.7745	42.776	45.3608	31.7268	39.039	51.0859	58.8082	54.6274	46.1265	29.5259		1.19516	2.9774		1.0568	1.15866		1.86463	3.0599	3.10007	2.81354	0.847453
31.4365	40.526	47.9572	47.6503	41.8793	32.1988	37.3502	51.4896	62.4425	52.9339	47.9108	32.8858		1.19564	3.06773		1.05748	1.15896		2.21127	3.92419	3.10018	2.81403	0.849443
30.1261	40.1556	44.3939	51.3901	39.9603	32.2365	35.4581	49.7774	61.4728	55.5538	42.939	32.4473		1.19614	1.96999		1.06745	1.15934		2.43081	4.41621	3.10106	2.81414	0.849839
29.3617	35.731	41.8813	50.1758	37.941	31.7982	33.665	45.6558	54.4687	60.0293	42.7745	32.4944		1.19621	2.56835		1.0684	1.15941		2.05905	3.5724	3.10124	2.81423	0.850791
27.7227	45.5492	53.6325	44.9494	44.8854	30.9803	37.4693	52.5155	64.7491	56.0019	43.7002	31.6478		1.1964	2.82913		1.071	1.15952		2.34415	4.2501	3.10468	2.81428	0.851296
28.3627	35.7234	43.6745	49.353	43.8695	31.3718	36.6166	46.4281	51.7865	57.7384	44.8008	30.5709		1.19655	3.04908		1.07233	1.16004		1.60565	2.48258	3.10689	2.81494	0.853125
29.058	33.4166	38.6857	41.7582	42.6996	30.618	39.2641	50.9429	58.1441	54.3775	45.7623	30.9355		1.19666	2.31226		1.07242	1.16068		1.80856	2.92372	3.10691	2.81505	0.853237
31.7821	37.8119	45.4789	47.8352	36.6706	31.2916	37.0244	49.104	57.2902	52.8268	45.7333	31.2893		1.1968	3.07834		1.07893	1.16089		1.94328	3.26021	3.10791	2.8151	0.853484
25.9118	42.0005	46.898	41.9626	43.4717	32.0366	34.7189	45.6958	52.9079	58.3484	43.5427	30.4333		1.1968	2.12753		1.08534	1.16127		1.84003	3.04898	3.10827	2.81515	0.853793
29.3983	41.8074	50.5237	54.4507	44.8896	31.1308	34.688	44.3639	49.9131	51.5514	45.5245	31.797		1.19685	3.18454		1.08692	1.16186		1.64377	2.58648	3.10877	2.81522	0.853992
27.4172	40.4506	48.8051	43.5427	41.0233	31.23	36.2216	48.7262	57.6623	55.3352	42.7927	31.1739		1.19716	3.24977		1.10105	1.16296		2.12103	3.63676	3.10887	2.81574	0.854266
29.4684	39.5251	46.6253	47.3739	44.5584	30.8539	35.369	47.1869	55.3801	54.136	47.2043	30.3309		1.19743	2.60056		1.10447	1.16335		1.96869	3.33357	3.10891	2.81605	0.854595
31.3749	38.391	46.5634	47.0473	40.5927	30.8578	36.4131	46.6779	52.638	52.7428	44.0216	30.3302		1.19762	3.08176		1.11293	1.16391		1.70536	2.69555	3.1096	2.81621	0.854599
30.4861	36.623	42.3123	38.353	40.3773	31.1712	34.733	47.3715	56.8364	53.9705	46.4851	31.7178		1.19764	2.38993		1.11923	1.16436		2.16153	3.78028	3.11043	2.81629	0.854737
34.3439	45.143	54.4213	38.4415	45.2593	32.3361	34.5115	43.7684	48.8305	55.4887	44.9017	32.0623		1.19773	3.3607		1.1233	1.16482		1.55991	2.41294	3.11164	2.81641	0.854806
26.7594	41.2034	50.2021	49.1608	42.8454	32.0182	36.0618	47.912	55.9984	55.6392	45.4617	31.3978		1.19788	3.44835		1.12614	1.16497		1.91343	3.21913	3.11168	2.8165	0.854957
33.3809	35.0457	39.3182	47.0104	18.0488	31.555	35.0381	45.5849	52.1719	59.2088	43.6386	31.1631		1.19789	1.89435		1.12886	1.16509		1.77687	2.8866	3.11204	2.81682	0.85508
27.4933	37.3158	44.0542	41.3453	38.3792	31.5981	38.2996	53.6422	66.0926	52.5582	42.4861	30.5894		1.19789	2.7407		1.13157	1.16542		2.33019	4.22112	3.11528	2.81702	0.855081
29.691	39.9891	46.4992	50.555	41.2655	31.1268	33.6513	45.1431	53.2739	54.3384	45.7907	32.1426		1.19793	2.67099		1.14411	1.16574		1.94788	3.32607	3.11692	2.81795	0.855694
27.7081	37.9862	46.0796	54.7272	43.801	31.8036	35.5598	50.102	62.0991	54.637	42.5251	32.8973		1.19793	2.95138		1.14643	1.16575		2.48334	4.53205	3.11832	2.818	0.8558
33.5295	36.4336	42.3033	49.4676	43.5072	31.3928	37.1671	51.7468	63.3786	54.9018	46.9007	30.8623		1.19798	2.61495		1.14704	1.16587		2.23699	4.02167	3.1191	2.81804	0.855992
28.3447	41.0495	50.5082	42.8708	43.8974	31.6993	34.7102	46.4741	54.7391	54.4871	45.3724	30.8715		1.19822	3.74295		1.14809	1.16664		1.94269	3.30759	3.11923	2.8188	0.856255
26.8298	36.8988	41.2511	46.2348	44.5316	32.9691	36.6147	50.3432	60.8921	56.3478	43.5563	31.3179		1.19837	2.07372		1.14938	1.16686		2.19252	3.87724	3.12047	2.81911	0.856592
29.8472	39.7264	46.0284	54.1246	45.3876	31.5469	37.0271	52.3848	65.1967	56.3024	42.6722	32.2569		1.19851	2.62616		1.15573	1.16697		2.40524	4.41176	3.12094	2.82026	0.85663
29.771	37.4999	43.0806	37.7586	42.0231	32.3353	34.802	48.6335	59.7862	57.5608	45.6042	32.8231		1.19866	2.39556		1.16058	1.16697		2.26329	4.08825	3.12097	2.82072	0.856777
26.4483	36.0595	40.1413	42.0082	38.4644	31.9844	35.1806	44.9205	50.4569	56.4841	42.4381	31.3756		1.19886	1.81899		1.16661	1.16793		1.65433	2.59469	3.12122	2.82081	0.856822
28.572	37.7767	45.6627	46.3123	39.5736	31.6989	34.9501	48.5009	59.2087	60.5806	45.4395	30.748		1.19886	2.94208		1.16923	1.1687		2.29355	4.1059	3.12333	2.82094	0.857576
29.5228	35.4855	42.4871	50.9072	40.4084	30.4739	34.3543	45.2165	52.3536	56.0034	43.9152	31.4485		1.19902	2.75596		1.17175	1.1695		1.82504	3.02421	3.12459	2.82285	0.857651
30.3503	41.5373	48.778	51.5594	36.1677	30.9777	33.1011	42.8533	48.8045	53.8331	45.8374	32.1836		1.19908	2.82101		1.17241	1.17132		1.67908	2.70373	3.12471	2.82348	0.858138
26.5346	42.1233	46.7997	44.369	25.8919	31.3211	35.2507	49.3213	60.7065	53.4726	44.0002	30.7006		1.19923	2.0387		1.18093	1.17213		2.34641	4.24502	3.12628	2.82525	0.858202
29.5911	40.5661	45.641	40.889	36.8669	31.5031	35.9622	47.6372	55.5111	53.5228	43.9847	31.4379		1.19931	2.29592		1.18491	1.17357		1.96463	3.28963	3.12719	2.82536	0.858477
32.963	41.7486	50.4819	42.1346	44.4418	32.1841	36.9834	47.5122	53.6954	55.5981	44.6956	30.3265		1.19934	3.23202		1.18504	1.17379		1.6751	2.65883	3.13136	2.82611	0.859183
26.7754	40.2333	47.5932	54.9105	41.4198	30.8574	35.5143	49.1693	59.8851	57.7585	43.8229	33.2926		1.19966	2.68463		1.18636	1.17397		2.28205	4.0729	3.13168	2.82628	0.859397
29.7697	38.6334	45.8931	44.4946	41.7658	30.9621	34.7839	45.9138	53.3142	58.604	45.6014	29.6509		1.19994	2.64381		1.18746	1.17408		1.8918	3.14967	3.1318	2.82637	0.859651
26.6776	40.8067	45.4933	41.1244	42.1357	30.9698	37.8085	50.9423	60.3813	52.4765	42.4237	30.4157		1.20005	2.28038		1.18808	1.17418		2.05307	3.52857	3.13181	2.82654	0.859758
33.9329	38.3174	47.5006	50.4601	41.383	31.8354	34.884	45.346	51.8545	55.0174	46.3979	31.6144		1.2001	3.21403		1.18926	1.17466		1.77266	2.87543	3.13261	2.82698	0.860148
30.659	36.3357	41.1882	38.2849	38.9776	31.371	33.4868	44.1649	51.2408	53.7686	44.3355	30.015		1.2001	2.21787		1.19097	1.17535		1.85349	3.0817	3.13275	2.82705	0.860656
29.7602	39.3244	44.9623	43.5519	45.532	31.0099	36.3143	47.0354	53.5928	56.5269	41.3519	30.8965		1.20014	2.21135		1.19262	1.17543		1.75163	2.82298	3.13354	2.82867	0.86076
35.5169	41.8144	50.3408	48.1901	44.5764	31.3731	34.1644	47.4874	58.0654	55.5868	44.2499	32.3594		1.20021	3.02673		1.19714	1.17597		2.23533	4.01011	3.13368	2.82902	0.861603
27.0018	37.0207	43.4597	53.576	39.8465	32.2497	34.8971	47.2727	56.3333	55.7568	46.3371	30.0461		1.20027	2.62224		1.19801	1.17671		2.0916	3.62294	3.13376	2.83017	0.861749
29.5019	41.6537	48.8253	44.8704	40.8195	32.0006	35.9874	47.1178	54.2694	57.8236	45.8918	32.593		1.20033	2.5979		1.19829	1.17689		1.809	2.97132	3.13576	2.83096	0.862529
30.9864	40.0889	45.5204	50.4447	33.8671	31.1186	35.6446	47.7284	56.2203	58.2537	45.4184	31.9039		1.20108	2.45812		1.19834	1.17747		1.98876	3.38638	3.13624	2.83129	0.863125
33.1307	39.5428	46.7364	40.3018	41.8891	30.9709	38.5392	53.9192	66.3617	58.5675	45.9009	30.4879		1.20123	2.68649	0.00294597	1.20429	1.1775		2.4635	4.4565	3.13709	2.83187	0.86354
30.3891	37.2597	42.369	38.53	41.9076	30.9666	32.8618	44.2116	52.3258	55.7986	43.0022	30.8185		1.20128	2.18736	0.00620857	1.20458	1.17771		1.9326	3.31425	3.13722	2.83205	0.863853
28.4065	43.7938	50.4147	50.2951	44.6186	30.2328	34.8025	47.6563	57.4068	54.5204	43.1461	31.8867		1.20133	2.59503	0.00814185	1.20565	1.17775		2.13599	3.75631	3.13753	2.83219	0.863939
32.9134	46.6683	55.1718	44.8464	39.7849	32.5116	36.7037	46.9479	52.8273	51.862	43.1904	32.353		1.20141	3.14369	0.0140716	1.20732	1.17795		1.64148	2.58355	3.13769	2.83229	0.864075
25.2241	41.7929	46.4107	42.1961	42.4243	31.5024	36.1581	48.5568	57.3625	53.0392	46.733	31.4481		1.20166	2.17181	0.0151205	1.20998	1.17996		2.08816	3.5712	3.13919	2.83246	0.864216
30.1057	39.6994	47.4695	47.7048	43.5209	31.4531	33.3309	46.3627	56.7317	51.1282	44.9464	31.8419		1.20194	3.01757	0.0257025	1.2103	1.18018		2.23785	4.01842	3.13976	2.83303	0.865249
32.4997	39.734	47.477	44.2219	41.1625	32.0173	35.3899	44.6572	49.5722	51.9368	44.5568	31.5883		1.20198	3.04163	0.0329347	1.21461	1.18093		1.51185	2.31367	3.13976	2.83347	0.865696
28.2222	32.4962	37.0436	51.6211	39.9975	31.177	37.2727	47.8802	54.1072	57.552	46.1771	32.4702		1.20198	2.15691	0.0345167	1.21767	1.18155		1.70979	2.7135	3.14001	2.83424	0.865828
30.0154	40.9222	49.0688	33.8015	37.6961	31.1373	35.4136	46.8372	54.4938	59.0608	45.6735	31.631		1.20232	2.97291	0.0347736	1.21912	1.18201		1.88652	3.15093	3.14081	2.83525	0.866259
27.1491	41.227	46.6179	39.0436	42.114	32.4346	37.0129	46.5251	51.4465	53.1865	45.9865	30.748		1.20237	2.26273	0.0366392	1.22023	1.18202		1.54444	2.34349	3.14083	2.83632	0.866349
29.8266	42.1422	47.6554	42.1948	43.5909	30.3508	36.361	51.4339	64.0025	60.5483	44.3886	31.9431		1.20255	2.1741	0.0432955	1.22187	1.18247		2.50898	4.6011	3.14158	2.83641	0.866473
30.6084	38.3269	43.6348	46.8169	43.4819	31.9403	34.9077	45.0017	51.0353	53.4656	43.9138	32.7464		1.2027	2.29357	0.0486212	1.22399	1.18264		1.71275	2.73653	3.14197	2.83697	0.866899
29.6146	42.233	46.6606	44.3197	41.8048	30.3981	35.899	49.5199	60.0914	57.5067	48.8457	29.4843		1.20273	2.00074	0.0597069	1.22644	1.18295		2.28618	4.06053	3.14217	2.83824	0.867045
29.0335	37.0943	41.2415	50.5377	40.0348	33.0549	36.2833	46.0619	51.4411	53.656	44.8749	31.1486		1.20273	2.03336	0.0614135	1.22818	1.18319		1.5786	2.447	3.1422	2.83843	0.867079
26.9005	39.3547	48.38	28.0782	39.2819	32.6888	35.0424	48.4521	58.9339	54.4011	45.4077	32.6999		1.20275	3.23936	0.0632299	1.22966	1.18423		2.2286	3.97061	3.14221	2.83966	0.867106
29.5392	42.2706	51.7629	40.8678	40.5538	31.0791	34.6348	48.562	59.8983	56.9858	44.3477	32.3171		1.20287	3.35673	0.0641525	1.23114	1.18436		2.37801	4.31363	3.14249	2.84197	0.867204
29.5924	33.9214	37.7414	52.4912	43.3393	31.6212	34.7061	46.0943	53.8546	54.0715	45.0745	31.7827		1.20299	1.84159	0.0675	1.23145	1.18523		1.93661	3.25627	3.14255	2.84236	0.86735
31.9064	42.4975	50.3144	38.987	43.5753	32.5506	34.1058	45.384	53.1265	50.1785	46.7109	30.9202		1.20309	3.14914	0.0746344	1.23182	1.18526		1.89824	3.20138	3.14287	2.84293	0.867584
31.2288	39.5847	46.3525	43.6809	42.4895	31.1349	36.2404	48.8456	57.9152	54.4717	46.6596	32.3422		1.20319	2.90895	0.081694	1.23241	1.18552		1.99645	3.43292	3.14314	2.843	0.867614
32.3172	40.5843	46.9647	47.6101	40.9393	31.8628	38.0729	48.8715	55.186	55.3343	44.6612	32.9897		1.20323	2.60161	0.0858285	1.23304	1.18574		1.75685	2.78418	3.14352	2.84378	0.868264
27.9912	43.1601	51.9335	47.3967	42.3389	31.8597	39.3034	52.5715	61.8592	55.8232	45.1056	31.6543		1.20329	3.29381	0.0863341	1.23868	1.18683		2.04474	3.47607	3.14381	2.84445	0.868335
31.5598	35.4368	40.2528	49.2901	45.0777	32.5163	32.3841	44.4908	53.7703	53.7759	47.4658	31.5827		1.2036	2.12073	0.0875288	1.23937	1.18825		2.18219	3.85479	3.14419	2.84447	0.86853
31.6916	43.475	51.3546	34.4952	39.3388	31.5499	35.3081	48.5193	58.6529	58.6222	47.0169	31.0816		1.20365	2.93104	0.0878103	1.23961	1.18856		2.23211	3.94423	3.14498	2.84449	0.868574
26.4947	39.2894	46.9395	42.8585	43.8378	30.8441	36.8668	52.1076	64.789	55.3266	47.5423	31.2472		1.20398	2.8283	0.0944746	1.24491	1.18916		2.41814	4.4302	3.14574	2.8445	0.868965
32.7463	44.3535	52.1719	48.3828	25.6339	32.3576	35.6111	49.2593	59.9412	54.6165	44.4577	30.9405		1.20402	2.82503	0.0990765	1.24502	1.18966		2.21986	3.95725	3.14654	2.84495	0.86936
28.7659	44.0989	54.4674	44.7865	31.5556	30.0395	34.3916	45.0905	52.0059	54.7784	46.0493	31.8614		1.20403	3.54639	0.102483	1.24554	1.19062		1.83017	3.01312	3.14738	2.84512	0.869504
29.278	35.8374	42.2308	49.9132	44.1074	29.3543	33.2444	43.9822	51.1882	54.1226	43.4268	31.7931		1.20409	2.7663	0.102586	1.24682	1.19082		1.83242	3.06214	3.14757	2.8453	0.869611
29.7185	39.1122	48.1022	48.4618	42.6037	31.315	36.3634	48.3347	56.5182	60.5888	42.9414	31.0861		1.20438	3.40601	0.10499	1.25105	1.19199		1.95815	3.29673	3.14821	2.84693	0.869647
35.3872	36.5678	41.2019	41.5992	43.3315	31.8486	33.4725	43.3816	49.4605	56.0348	43.3717	31.845		1.20454	2.2015	0.107873	1.25566	1.19222		1.71891	2.77339	3.15063	2.84737	0.87152
30.0507	37.2149	42.1693	50.7555	46.1586	31.8608	35.3104	48.4038	58.3701	54.7164	44.5801	31.155		1.2046	2.25442	0.110348	1.25571	1.19242		2.22178	3.91292	3.15065	2.8474	0.871769
26.825	41.9511	51.8682	38.8087	41.1123	31.3033	36.8133	51.135	62.4837	57.2927	44.3186	30.8325		1.20463	3.9253	0.114512	1.25653	1.19312		2.28707	4.09936	3.15105	2.84778	0.871823
27.3682	42.4663	49.5501	44.2801	47.2653	30.6997	34.6822	47.0094	56.0529	55.3649	47.0514	32.1718		1.20508	2.80738	0.114831	1.25763	1.19338		2.06841	3.58583	3.15151	2.84786	0.87191
29.5192	34.1005	38.367	54.5589	45.0387	31.7354	37.5528	50.5904	59.9553	57.3915	44.0074	29.7452		1.20514	2.02744	0.11648	1.25832	1.1936		2.0512	3.52458	3.15171	2.84819	0.872273
32.8607	39.9154	46.4675	20.6783	46.5106	32.0527	34.9498	47.8459	57.6208	55.7856	44.1263	31.2358		1.20516	2.77477	0.12152	1.26302	1.19371		2.14716	3.77465	3.15176	2.84856	0.872355
30.2647	35.8208	44.5277	48.8248	40.0538	31.3747	33.2115	43.8148	50.8496	58.6193	45.6532	31.3985		1.20519	3.35584	0.13477	1.26308	1.19379		1.84352	3.06661	3.15216	2.84985	0.873073
32.6795	38.2106	44.3777	50.0651	43.0866	31.5527	34.1115	48.126	59.73	51.1774	44.4936	29.5412		1.2054	2.51049	0.134832	1.26591	1.19408		2.29994	4.20431	3.15217	2.84998	0.873175
29.2791	43.6452	53.9318	54.0592	42.9431	31.2042	36.5304	46.4758	52.0157	54.1798	45.1449	32.12		1.20569	3.53424	0.140497	1.26723	1.19429		1.64024	2.5539	3.15252	2.85028	0.873336
27.1675	35.89	40.3605	47.0084	43.3405	30.154	38.3474	51.6852	61.2817	54.1474	46.4261	32.5836		1.20594	2.08451	0.142549	1.26849	1.19433		2.11911	3.6438	3.153	2.85053	0.873851
29.8849	37.0004	41.5317	46.7398	40.7597	31.452	33.4276	45.8929	55.4269	59.3366	46.3635	31.6382		1.20599	2.15309	0.143164	1.27245	1.1955		2.20241	3.88689	3.15445	2.85095	0.874343
34.912	42.4859	49.6627	44.1002	18.9629	32.7996	36.8911	48.1596	55.3067	57.4057	42.3131	31.2077		1.20622	2.69626	0.145483	1.27674	1.19582		1.77255	2.89682	3.15507	2.85159	0.875055
29.6479	41.6694	46.9422	47.2512	42.2176	31.4907	34.7229	45.8802	53.3296	51.7483	45.1148	31.9319		1.20627	2.18739	0.151118	1.28105	1.19602		1.84777	3.08148	3.15569	2.85197	0.875077
31.3209	42.014	49.4668	47.6215	41.1609	31.4628	36.5148	50.2746	60.8924	55.5113	43.6965	30.7634		1.20633	2.74985	0.157833	1.2855	1.19655		2.25816	4.00067	3.1565	2.85288	0.875397
29.032	41.8086	51.5431	32.031	41.4082	30.7437	37.5142	50.846	60.6252	56.817	44.4628	32.0043		1.20651	3.45995	0.158398	1.28646	1.19719		2.08323	3.61132	3.15655	2.85316	0.875587
30.9424	36.6052	41.0938	40.0375	42.3387	31.829	35.701	47.7114	56.0917	52.3319	42.7971	30.45		1.20703	2.19003	0.158878	1.29091	1.19731		2.04188	3.46661	3.15686	2.85339	0.876368
30.5492	37.8275	45.4831	41.5345	38.7898	30.8973	36.6913	46.3596	51.5288	53.0191	44.1112	32.5946		1.20737	3.10911	0.162154	1.29156	1.19805		1.58552	2.43324	3.15764	2.8535	0.8764
26.1297	42.1266	47.6312	38.9095	41.3305	31.762	34.3644	48.5421	60.3203	53.1683	45.044	31.4587		1.20763	2.51359	0.164987	1.29648	1.20056		2.42584	4.44109	3.16066	2.85411	0.876574
30.2995	37.343	45.1865	55.7398	33.4733	31.2227	35.0608	47.3731	56.3087	53.094	43.8287	32.3715		1.20768	3.2133	0.165119	1.29707	1.20128		2.11936	3.65748	3.16176	2.85411	0.876701
30.5721	36.201	42.6306	48.6686	40.269	32.4574	33.5287	44.8907	52.8725	59.4344	46.0599	31.0335		1.20804	2.72602	0.166954	1.30195	1.20145		1.96177	3.33993	3.16206	2.85446	0.876865
28.4599	39.2283	46.8301	53.3461	46.4475	31.9786	34.352	45.5721	53.184	58.6238	45.4281	31.7412		1.20824	3.1185	0.167764	1.31558	1.20171		1.93712	3.25128	3.16231	2.856	0.876927
27.3655	40.6129	48.244	34.4975	40.2765	30.2481	36.9839	48.461	55.8608	56.5931	46.0543	31.1723		1.20829	2.74978	0.170236	1.31564	1.20256		1.85452	3.0502	3.16237	2.85607	0.877352
31.0804	41.7765	51.9335	53.621	33.6202	32.0767	34.787	45.2706	51.8261	54.9058	43.2398	32.1068		1.20845	3.52054	0.171428	1.3171	1.20288		1.73212	2.81525	3.16281	2.85629	0.877544
28.8468	36.3323	40.7736	46.592	39.8547	31.3825	34.7114	43.7347	48.4746	55.6852	43.4403	32.0194		1.20847	2.13925	0.17303	1.32174	1.20298		1.49535	2.28086	3.16336	2.85706	0.877657
31.0012	35.327	39.6377	36.3837	40.502	31.7668	32.994	42.4676	48.0856	55.2083	46.8997	32.1968		1.20855	1.97382	0.175923	1.32188	1.20303		1.6436	2.61828	3.16378	2.85708	0.878127
25.0598	32.0066	35.3549	49.7419	44.0745	30.8784	35.9775	49.4291	59.7403	55.9278	47.4715	32.8516		1.20862	1.72736	0.177505	1.32257	1.20306		2.20107	3.88829	3.16383	2.85718	0.878155
27.1661	44.4344	54.4749	47.4328	43.206	31.6099	38.1003	53.6957	66.5709	56.9671	43.8689	30.149		1.20886	3.78321	0.180232	1.32297	1.20346		2.42914	4.43459	3.16431	2.85725	0.878512
29.0675	37.3427	45.3275	40.4886	33.2661	31.1549	34.3638	46.2084	54.6607	55.1127	43.8008	32.0087		1.20891	3.18051	0.181942	1.32414	1.20353		2.01851	3.45891	3.16475	2.85748	0.878565
27.1143	38.2977	43.4171	54.3083	33.8814	30.9108	36.7349	48.5328	56.4061	55.2306	43.8207	31.4833		1.20901	2.29442	0.183262	1.32609	1.20413		1.88068	3.13574	3.16486	2.85768	0.878706
31.729	37.9544	42.2781	47.6474	36.4732	31.8781	35.2993	49.5032	61.0709	50.0299	44.1045	32.1685		1.20919	2.17617	0.183766	1.32616	1.20421		2.36172	4.28511	3.16576	2.8577	0.87874
28.6376	40.4423	47.135	49.2805	36.3951	31.9657	34.668	47.813	58.0093	57.9346	43.1415	30.8471		1.20923	2.56108	0.184006	1.32809	1.20489		2.25431	4.00292	3.166	2.85787	0.878877
30.3283	41.3485	50.8725	44.7944	45.1857	31.0564	35.5718	48.4098	57.9556	52.4214	45.6004	31.757		1.20932	3.57989	0.187744	1.33152	1.20514		2.11066	3.68006	3.1661	2.85896	0.879336
28.0583	42.0249	47.0797	37.1058	39.7629	31.115	34.4291	46.1298	54.3715	51.5465	44.1169	31.3366		1.20935	2.29596	0.191698	1.33475	1.20542		1.9434	3.31229	3.16716	2.8592	0.879541
30.9482	43.0507	53.5211	42.3959	40.1372	31.5714	34.3203	43.6671	48.8757	55.6453	45.2585	30.5482		1.20939	3.58063	0.191919	1.3375	1.20551		1.58137	2.46258	3.16731	2.85931	0.880234
27.6664	39.2281	44.4656	55.6021	42.281	30.3605	34.0159	46.6587	56.3013	56.9073	45.4927	31.2071		1.20952	2.25755	0.193982	1.3395	1.20574		2.15941	3.80637	3.16733	2.85931	0.880303
27.6165	36.5013	42.6394	50.3506	41.6383	30.1287	35.3344	45.0561	50.5411	52.2096	43.9113	31.0318		1.20952	2.40787	0.194658	1.34151	1.20576		1.66474	2.60397	3.16839	2.85979	0.880364
28.1462	43.1174	53.5966	52.5441	36.7573	31.0591	35.6575	49.8195	61.2326	53.2574	42.977	31.2828		1.20959	4.00191	0.199274	1.34155	1.20601		2.33201	4.21135	3.16843	2.86031	0.880853
29.5783	33.097	37.6426	48.3116	41.8158	30.5873	36.9221	46.6285	51.8025	56.0269	44.2713	30.3313		1.20964	2.09105	0.199282	1.34183	1.20613		1.59414	2.4439	3.16896	2.86059	0.881046
28.3702	43.5849	51.5539	51.375	44.91	31.0603	33.0319	43.5102	50.4178	55.1345	47.7884	30.7408		1.20998	2.98724	0.20107	1.34397	1.20634		1.81965	3.01921	3.16922	2.8608	0.881296
26.5724	40.0018	45.3558	44.7737	43.1601	32.7353	36.047	49.288	59.2853	54.4522	45.9526	32.3245		1.20999	2.42501	0.203273	1.34533	1.20725		2.15718	3.78591	3.16935	2.86132	0.881923
30.7703	40.1686	45.2288	50.0621	41.0384	32.2394	34.4923	43.7211	48.7522	51.4945	45.3538	31.24		1.21011	2.31238	0.209816	1.34541	1.20744		1.50684	2.32829	3.17021	2.86152	0.882144
26.469	44.0484	52.9764	37.3653	41.5175	31.5527	32.902	46.1452	56.9331	56.8754	44.3699	31.0523		1.21024	3.28875	0.210937	1.34724	1.20797		2.32532	4.21953	3.17039	2.86172	0.882184
29.0187	48.0744	55.7647	56.7047	45.8953	31.8953	36.7487	48.4955	56.2983	51.938	45.1162	31.0238		1.21032	2.83793	0.211487	1.34957	1.20807		1.91449	3.18619	3.17198	2.86204	0.8822
30.0182	41.685	51.5721	48.762	43.5692	31.1714	35.7002	50.2674	62.2641	51.7959	43.365	30.9959		1.21048	3.62108	0.212866	1.35157	1.20846		2.34796	4.28158	3.17214	2.86222	0.882477
27.6681	34.3483	39.124	51.1377	43.33	31.5312	37.5111	47.3273	52.5287	50.1608	47.3638	31.9937		1.21064	2.21914	0.21472	1.35248	1.20915		1.52729	2.33658	3.17219	2.8626	0.882914
29.3799	39.3358	45.8158	50.4189	41.5586	31.9837	35.4564	46.0659	52.65	58.0577	48.6872	31.1087		1.21069	2.71726	0.219358	1.35248	1.20923		1.81228	2.93697	3.17291	2.86275	0.88307
31.0091	40.502	47.4753	51.2151	41.0918	30.7673	36.9992	46.8531	52.1938	59.7799	44.7007	33.0128		1.21087	2.67866	0.220526	1.35624	1.20939		1.60712	2.47815	3.17307	2.8629	0.883325
29.584	35.6425	42.6562	48.9459	40.4498	30.7107	34.5881	46.4685	54.9192	54.8057	44.6127	31.3202		1.21092	2.83036	0.221087	1.35746	1.20949		2.07452	3.55017	3.17325	2.86312	0.883643
28.7491	38.9173	45.6474	46.7715	28.1241	33.1134	34.4137	47.1599	56.8524	54.5487	44.8961	30.9181		1.21098	2.51542	0.222146	1.37133	1.20987		2.19189	3.85865	3.17343	2.86318	0.884445
27.8788	46.6596	57.2177	46.4446	41.7687	31.5166	36.9177	51.5787	63.3928	55.9312	43.1328	30.1422		1.21103	3.61514	0.222289	1.37328	1.21016		2.40712	4.34683	3.17376	2.86344	0.884453
30.8209	43.1578	53.3621	52.2428	40.7628	32.0398	35.8517	47.5612	55.5048	56.9895	43.5681	32.2831		1.21109	3.78702	0.222831	1.37644	1.21044		1.90525	3.19775	3.174	2.86368	0.885174
28.7261	49.9522	60.7898	48.856	33.98	31.4863	35.7626	46.8959	54.0971	56.232	43.6614	31.6052		1.21128	3.57746	0.22347	1.38022	1.21057		1.82944	3.01278	3.17538	2.86512	0.885292
27.0606	39.4125	45.7401	49.0916	42.4051	32.6663	36.4228	51.1365	63.1572	55.4188	45.936	31.1696		1.21142	2.58846	0.223492	1.38221	1.2106		2.33241	4.23793	3.17543	2.86551	0.885559
33.4037	43.6037	48.9206	44.9673	40.7675	30.8269	36.0828	49.3825	59.454	58.7595	42.6815	31.548		1.21143	2.28264	0.237544	1.38501	1.21075		2.18858	3.84592	3.17556	2.86595	0.886611
28.8986	33.8107	38.8152	50.132	41.8143	31.178	35.0177	44.5945	49.9584	55.1917	47.5685	31.4115		1.21148	2.15416	0.23773	1.38941	1.21078		1.61504	2.51963	3.17566	2.86614	0.886705
31.1988	43.554	48.5029	48.7665	39.5452	31.6089	37.017	49.9752	59.3528	52.2955	43.4912	30.9397		1.21149	2.13846	0.239557	1.39144	1.21211		2.09335	3.60827	3.17573	2.86658	0.88688
28.4156	42.4364	50.2364	51.3513	39.3014	31.2139	38.6284	54.312	67.1767	55.9665	45.1216	31.5453		1.21158	2.88787	0.241473	1.39251	1.21277		2.43971	4.44092	3.17583	2.86728	0.887034
29.3974	35.2536	39.8897	34.113	37.9142	31.7159	38.5934	48.8252	54.3387	53.7617	45.1076	31.9143		1.21204	2.12324	0.242451	1.39259	1.21291		1.59384	2.45269	3.1762	2.86734	0.887394
29.3223	40.3075	48.8508	46.587	38.7056	31.1533	35.0756	46.2772	53.7111	53.5507	45.6534	31.5899		1.21219	3.40354	0.245552	1.39615	1.21295		1.84317	3.06638	3.17646	2.86752	0.887414
31.9336	35.8801	42.8719	44.2547	42.8198	32.8136	37.3714	48.2506	54.8026	54.5565	45.855	30.8134		1.21238	2.87427	0.25875	1.39641	1.21295		1.72638	2.76608	3.17651	2.86755	0.887815
31.0703	39.2836	44.9987	36.7867	42.8931	30.9563	36.8584	49.2182	57.8162	53.8727	45.9896	29.6484		1.21269	2.40881	0.262368	1.39704	1.21297		1.96198	3.32682	3.17665	2.86781	0.887827
30.8324	40.7691	47.7523	48.0153	41.942	31.356	36.797	47.5573	54.0699	55.0549	44.5925	33.0926		1.21286	2.80404	0.262689	1.39907	1.21341		1.73908	2.79166	3.17677	2.86815	0.88804
27.1238	40.3884	46.9353	49.2918	40.5489	31.748	36.1603	50.8223	62.8364	52.7557	44.0585	32.0405		1.213	2.77221	0.263055	1.39941	1.21351		2.42651	4.41478	3.1768	2.86845	0.888516
26.7757	35.2648	41.392	51.8464	41.4995	30.4263	36.5508	50.2726	60.8273	55.318	42.7503	32.06		1.21347	2.60243	0.264544	1.39969	1.21394		2.23905	3.96134	3.17689	2.86859	0.888674
32.1845	40.4765	49.1906	45.3856	37.3866	30.9794	35.0941	46.5251	54.2595	52.6614	42.1371	31.6912		1.2135	3.2156	0.266516	1.40445	1.21404		1.87794	3.14857	3.17703	2.86909	0.888845
27.6296	41.3853	47.2871	51.2494	42.9499	31.6131	36.1845	45.6649	50.6964	55.9967	46.3755	31.704		1.21363	2.34045	0.26748	1.40446	1.21409		1.55563	2.38124	3.1786	2.86919	0.889852
29.6092	39.91	45.2978	49.9376	39.3891	31.6632	37.5268	52.3068	64.1371	52.6881	43.9043	31.738		1.21371	2.29544	0.269598	1.40682	1.21499		2.3323	4.19913	3.17882	2.86958	0.889995
32.4671	36.7561	43.4442	38.4431	41.734	31.2089	36.429	47.1329	53.6456	55.7098	43.4127	32.0811		1.21377	2.80285	0.271019	1.4069	1.215		1.74962	2.81417	3.17884	2.86991	0.890428
26.2254	45.7239	54.1936	46.5458	35.8717	32.4467	36.5208	50.2715	60.8749	53.3979	46.8582	31.8422		1.21408	3.05235	0.275749	1.40976	1.21501		2.21583	3.92448	3.17909	2.87033	0.890903
27.876	35.1001	39.7667	49.1158	41.6814	31.7193	35.0823	44.8064	50.3415	57.9311	43.5059	31.4861		1.21422	1.95146	0.281928	1.41156	1.21519		1.60173	2.51347	3.17982	2.87078	0.890916
28.8872	43.1017	47.8101	42.2571	39.4799	33.0217	36.0945	47.7356	55.5366	57.7123	42.761	31.0668		1.21431	2.00793	0.282981	1.4124	1.21575		1.92344	3.21237	3.18072	2.87079	0.891012
28.7596	39.3597	47.8539	48.5155	43.9298	32.3659	36.6737	46.1253	51.0338	54.8657	46.0512	30.7659		1.21449	3.45647	0.291415	1.41291	1.21575		1.51045	2.29487	3.18093	2.87121	0.891119
33.8881	41.3213	50.2301	45.4145	43.5836	31.9814	35.6581	48.8964	58.9834	52.1523	44.4365	31.2418		1.21474	3.4651	0.293006	1.41561	1.21616		2.21059	3.89495	3.18134	2.87129	0.891429
31.8455	36.6882	44.2279	44.4218	45.5119	32.4257	35.9962	45.5409	50.6851	56.9817	43.8972	30.5444		1.21474	2.93846	0.294862	1.42561	1.21632		1.57258	2.42015	3.18136	2.87147	0.891498
26.6144	41.32	47.692	51.9349	44.5248	31.7494	34.0249	45.0752	52.5305	52.424	43.667	32.4913		1.21514	2.48456	0.295541	1.42723	1.21661		1.9192	3.21403	3.18144	2.87154	0.891512
25.4215	43.1655	53.5111	53.3912	43.6373	32.3032	33.944	45.6379	53.9786	55.7049	44.1219	31.9681		1.21584	3.55985	0.297589	1.4315	1.21701		2.05684	3.5239	3.18168	2.87192	0.89174
28.4833	37.7326	44.199	47.7628	40.6577	32.4097	34.2298	48.2465	59.822	56.1511	47.1879	30.7096		1.21626	2.70463	0.300072	1.43453	1.21769		2.40726	4.39527	3.18172	2.87237	0.891858
27.6037	38.7379	44.8805	46.517	44.053	31.1828	36.6582	48.9264	57.4447	53.0285	44.7045	32.0322		1.21674	2.54238	0.302483	1.43519	1.2178		1.97431	3.34514	3.18174	2.87248	0.89231
32.2742	42.0517	50.081	36.2311	39.5953	31.2272	36.9434	50.7723	61.3834	55.3696	43.5553	31.0984		1.2168	3.22687	0.30332	1.43958	1.21847		2.20674	3.90001	3.18202	2.87259	0.892379
30.7794	39.3031	48.4122	52.1331	42.5203	30.0887	36.091	49.1073	58.7798	55.215	44.933	31.4323		1.21687	3.37373	0.304923	1.43987	1.21851		2.05555	3.58304	3.18235	2.87287	0.892385
30.8396	41.5757	51.4426	49.3616	37.9956	30.9278	35.3662	49.1536	60.0976	53.5292	43.6914	31.1956		1.21689	3.77404	0.306539	1.4424	1.21858		2.26373	4.0606	3.18246	2.87309	0.892615
29.3864	42.8685	52.3992	50.9454	41.0392	31.7467	34.0151	46.505	55.9322	56.7217	43.5501	30.4194		1.2172	3.61291	0.307921	1.44261	1.21863		2.18382	3.83213	3.18256	2.87338	0.893273
30.2917	42.3879	51.7486	47.6377	40.101	31.2574	34.9732	45.0538	51.0578	51.9094	43.5053	32.2089		1.21739	3.36299	0.310245	1.44343	1.21908		1.67963	2.68002	3.18271	2.87344	0.893747
29.8142	37.2618	43.7527	50.9897	32.8835	31.1007	35.9828	45.7167	51.0962	57.8508	42.8775	31.9006		1.21764	2.50149	0.311426	1.44379	1.21913		1.58286	2.45764	3.18327	2.87353	0.893783
31.6355	41.0256	48.762	46.8495	42.2244	31.8214	35.06	47.1818	55.8563	54.4786	47.0883	31.7575		1.21771	2.95989	0.311582	1.44425	1.21937		1.98	3.39691	3.18365	2.8737	0.893839
28.9119	39.4923	48.7318	51.03	41.9709	31.632	34.7535	48.1029	58.5705	53.4374	45.6878	32.2605		1.21786	3.14989	0.314981	1.44434	1.2194		2.2456	4.00642	3.18389	2.87385	0.894138
30.6158	37.3594	45.7654	43.2025	43.4348	31.6413	34.6974	45.8446	53.2861	61.0145	44.6409	31.6949		1.21812	3.36779	0.316121	1.45229	1.22013		1.88615	3.14527	3.18401	2.87387	0.894248
28.9605	37.3669	43.4151	42.7795	39.6086	31.972	35.9321	47.3031	54.7812	57.2975	45.1319	30.0717		1.21812	2.48644	0.3203	1.45383	1.22034		1.92613	3.19284	3.18434	2.87449	0.894557
29.0533	36.2034	42.0945	49.5357	38.2884	32.8017	32.5761	45.2838	55.376	59.2625	44.7441	31.2549		1.21817	2.4597	0.323779	1.45425	1.22038		2.24494	4.02781	3.18444	2.87456	0.894919
30.7853	38.2883	45.3453	50.9227	39.1326	33.1685	34.2778	43.126	47.7308	49.3606	43.2134	31.2624		1.2182	2.63086	0.324081	1.45893	1.22061		1.50509	2.28838	3.18485	2.87461	0.895221
30.6574	38.3713	43.2019	45.0486	39.7307	30.8377	35.6783	46.8762	54.1795	54.9153	44.2602	32.2091		1.2182	2.17534	0.324515	1.462	1.22088		1.89321	3.12797	3.18521	2.8747	0.895228
34.6589	33.9342	39.0694	41.9891	38.7498	31.7028	34.2812	47.902	58.8825	57.6042	45.9685	31.2807		1.21823	2.31057	0.325248	1.46683	1.22122		2.29822	4.15094	3.18543	2.875	0.895452
27.916	40.3952	47.4027	21.8467	37.4304	30.7227	36.9609	48.6845	56.4122	55.764	44.5977	31.8225		1.21834	2.91784	0.330236	1.46819	1.22135		1.89587	3.14556	3.18575	2.87525	0.895468
30.7943	39.3166	46.4415	50.438	35.5206	30.8679	37.0073	49.2762	57.7194	52.2815	44.0563	30.402		1.21871	2.7154	0.332485	1.46841	1.22151		1.98829	3.35659	3.18618	2.87544	0.895768
29.2656	37.9952	42.6373	41.7485	41.4835	31.7587	36.534	47.6639	54.7037	53.3262	42.5338	31.8165		1.21872	2.13857	0.335887	1.47227	1.22208		1.79329	2.92756	3.18636	2.87697	0.895825
30.3359	38.1831	42.6351	30.9533	28.9812	31.8015	36.7777	51.3601	63.0959	53.218	44.9212	31.5732		1.2189	1.94623	0.336235	1.47252	1.22208		2.30467	4.15945	3.18676	2.87825	0.896239
33.6933	36.069	43.761	37.1865	33.6007	32.0469	36.4709	49.0657	58.069	57.0835	45.3716	30.1772		1.21945	2.93609	0.33769	1.47479	1.22216		1.99472	3.42061	3.18681	2.87841	0.89625
32.8166	38.138	43.0873	44.9307	34.8343	32.0492	34.9525	47.0905	55.8114	57.0003	44.8753	29.9648		1.21968	2.18747	0.338338	1.47649	1.22223		2.00382	3.44352	3.18721	2.87873	0.896416
32.2084	43.4478	53.7104	54.6878	24.2429	31.1129	38.0368	50.2387	58.3723	56.2502	45.2372	32.6879		1.21972	3.65568	0.343164	1.47956	1.22266		1.93125	3.2186	3.18797	2.87876	0.896723
30.637	43.113	51.388	46.031	37.6206	32.1182	35.4419	47.3178	55.5734	53.5892	44.7587	31.1745		1.21988	3.02666	0.344438	1.48249	1.22299		1.97032	3.33999	3.18822	2.87899	0.896898
29.7498	42.3552	48.6376	49.23	37.3274	30.0648	36.0863	48.7564	57.9503	56.5429	43.2897	31.4622		1.22027	2.47208	0.346901	1.48583	1.2231		2.0788	3.58724	3.18844	2.87902	0.896928
31.3423	40.7129	49.0787	38.3069	40.8725	30.9214	34.5617	44.0302	49.3447	54.9012	44.155	29.8309		1.22043	3.322	0.347609	1.48721	1.22327		1.65528	2.58436	3.18919	2.87941	0.896954
28.9395	39.8629	44.0085	36.5599	32.0944	30.8416	34.7331	44.9437	51.1596	56.5585	45.4835	32.288		1.22048	1.93351	0.357828	1.48784	1.22351		1.71149	2.75341	3.18939	2.87989	0.897
29.9049	35.7589	40.4785	41.2215	37.2046	30.9681	34.3722	48.4752	60.1404	56.0876	41.5249	31.0645		1.22052	2.04286	0.362787	1.48837	1.22366		2.38912	4.36527	3.18949	2.88038	0.897254
27.1357	38.1842	46.4128	50.5887	34.6266	32.1861	33.9874	43.0044	47.8677	55.6395	46.8344	31.4464		1.22056	3.129	0.3634	1.48893	1.22392		1.55245	2.38975	3.18969	2.88127	0.897325
29.9385	39.0271	44.2681	35.7127	41.3785	31.5444	35.1615	45.7259	52.3108	55.5567	46.1939	31.6965		1.22059	2.14059	0.365482	1.49421	1.22421		1.72852	2.80593	3.19001	2.88172	0.897509
28.9008	36.3155	44.2894	51.156	38.4065	31.3132	35.6699	47.729	56.182	55.9421	44.1603	31.2548		1.22067	3.20811	0.36854	1.4947	1.22464		2.00632	3.41267	3.19037	2.88206	0.897686
33.0041	37.4822	45.2978	47.2375	43.9601	32.5344	35.0425	46.0796	53.3035	52.7218	46.8805	30.874		1.22074	2.88133	0.373535	1.49972	1.22504		1.87195	3.09718	3.19051	2.8825	0.897877
29.1368	37.3905	42.8451	52.0334	29.123	32.2774	35.0017	48.3805	58.8283	55.6801	44.4794	32.0007		1.22074	2.36529	0.374413	1.5001	1.22578		2.21739	3.94899	3.19062	2.8828	0.898047
26.1173	39.3608	44.5532	31.7126	41.1272	32.4659	36.1279	46.8098	53.3537	55.0135	43.9973	31.3602		1.22094	2.10633	0.374905	1.50199	1.22634		1.75355	2.82781	3.19075	2.88301	0.898111
29.2653	37.9476	43.7275	43.9974	41.0374	31.7666	34.8718	47.0329	55.8037	56.2572	44.1935	31.4602		1.22112	2.58525	0.376772	1.50225	1.22649		2.02889	3.49216	3.19085	2.88312	0.898448
30.5574	39.353	48.3772	46.7651	41.295	30.4312	33.2374	42.8217	48.5327	53.574	46.9453	31.6129		1.22158	3.60703	0.378009	1.50302	1.2268		1.64958	2.63252	3.19098	2.88322	0.898822
30.55	37.7841	46.1287	51.5754	40.4939	31.9022	35.8951	48.3368	57.2606	55.8607	44.2386	32.5572		1.22179	3.17315	0.37884	1.50432	1.22681		2.04656	3.51444	3.19114	2.88399	0.89902
31.3607	40.2204	49.2925	49.6982	38.2797	31.2941	35.6298	49.1728	59.6995	54.0351	42.9673	31.3193		1.22183	3.43531	0.383083	1.50489	1.22741		2.21923	3.9442	3.19135	2.88474	0.899081
27.5324	39.3314	47.7526	37.654	44.9812	31.9746	37.6124	49.4993	57.3062	56.8096	45.0096	31.8047		1.22191	3.40143	0.387042	1.50573	1.22746		1.84491	3.05658	3.1914	2.88482	0.89918
32.8606	36.6743	42.6809	48.2691	41.3352	31.1606	35.5985	45.1647	50.4082	54.8747	45.3015	30.8691		1.22222	2.51527	0.389551	1.50848	1.22761		1.58014	2.44625	3.1918	2.88482	0.899759
27.3081	43.4853	50.6053	49.4335	42.9843	30.8673	37.0319	50.3992	60.3399	55.6603	44.5041	31.3163		1.22227	2.91696	0.395196	1.5114	1.22787		2.08956	3.6435	3.19203	2.88495	0.900076
30.8327	39.4292	48.5399	50.1423	35.6334	32.2213	39.4242	54.9798	67.4493	55.407	45.3226	30.8432		1.22229	3.52423	0.402283	1.51167	1.22839		2.37753	4.28338	3.19226	2.88497	0.900386
26.9961	49.904	60.3792	48.6538	44.7763	30.7913	38.7473	49.1531	54.8523	56.05	44.3892	32.0498		1.22239	3.48946	0.406786	1.513	1.22874		1.58822	2.45807	3.19258	2.88524	0.900977
28.5049	39.2031	45.2524	48.0621	41.2958	30.9116	37.8112	49.8899	57.908	51.7776	44.974	31.6685		1.22245	2.45561	0.412449	1.51404	1.22875		1.89528	3.15341	3.19307	2.88572	0.901187
30.0854	35.6878	40.4351	33.4984	38.2108	31.2206	34.4245	46.4835	55.2158	52.9356	44.8866	31.1317		1.22264	2.2025	0.413901	1.51512	1.22876		2.06696	3.56373	3.19337	2.88595	0.901211
27.4591	37.7909	42.2716	55.7017	40.7433	31.8589	36.2752	45.7904	50.8479	55.3278	43.3054	31.617		1.22271	1.95996	0.41433	1.51608	1.22883		1.5479	2.37063	3.19352	2.88613	0.901443
28.3802	39.3371	46.0832	50.5104	40.6354	30.2398	35.7462	44.9137	49.6434	53.6545	41.6549	31.2774		1.22284	2.48727	0.4146	1.51722	1.22924		1.54026	2.33492	3.19368	2.88621	0.901567
25.5206	35.1215	39.896	53.5911	44.9808	31.5346	36.8717	50.4661	60.7632	57.9183	44.7027	31.5007		1.22317	2.07289	0.417017	1.52327	1.22951		2.23403	3.92619	3.19392	2.88637	0.90165
29.1709	41.4775	49.8596	44.4575	20.5623	31.456	35.5381	49.6959	61.1338	53.7886	44.9965	31.5561		1.22321	3.17669	0.419983	1.52663	1.22966		2.41396	4.36416	3.19432	2.88765	0.90168
30.1055	40.3525	47.1247	47.7685	42.9462	31.7671	33.2375	42.0899	46.888	53.2792	42.8169	31.024		1.22329	2.8342	0.425386	1.52919	1.2306		1.56422	2.41205	3.19462	2.88804	0.901791
30.4715	40.2044	44.7897	51.5529	42.4035	31.774	35.8169	46.9185	54.0673	55.6793	47.503	30.6722		1.22336	2.03847	0.425564	1.52963	1.23069		1.83247	3.01248	3.19539	2.88873	0.901897
29.4505	38.8854	46.1006	35.7723	43.4321	31.6358	37.4999	52.452	64.5399	55.7015	43.4738	32.0338		1.22336	2.87668	0.425931	1.53121	1.23099		2.38649	4.31582	3.19576	2.88901	0.902068
29.4694	35.2655	43.5832	32.935	40.8908	31.3652	34.897	48.1375	58.4136	52.4072	45.381	30.6193		1.22353	3.32034	0.426557	1.53418	1.23158		2.20877	3.92302	3.19642	2.88914	0.902076
30.7795	42.7039	52.8405	47.9569	39.0355	30.5544	36.4223	51.4683	63.9804	56.3119	47.0009	32.1838		1.22359	3.67202	0.426702	1.53738	1.23181		2.46438	4.51372	3.19652	2.88937	0.902433
31.1351	43.9682	52.0577	45.376	37.024	30.2301	35.3068	45.5033	51.5894	55.1712	46.2069	31.5533		1.2236	3.15572	0.433426	1.53848	1.23231		1.66917	2.66548	3.19665	2.88956	0.902484
28.648	41.6105	49.2928	48.7612	35.3105	32.0505	38.604	52.8207	63.5783	57.4396	46.2886	32.0182		1.22366	3.11158	0.434908	1.5402	1.23337		2.20977	3.8819	3.19746	2.88986	0.902617
29.9487	36.6906	42.3888	54.1906	37.941	31.5459	35.9333	46.0296	51.8696	54.9475	44.8511	31.6742		1.22376	2.50653	0.43789	1.54115	1.23345		1.61439	2.54818	3.1976	2.89007	0.90272
25.7131	44.3617	54.5766	45.2226	42.5673	32.1542	35.5928	45.7937	51.8303	56.6211	45.8238	33.2766		1.22385	3.60534	0.439333	1.54635	1.23381		1.72159	2.74038	3.19767	2.89015	0.902918
29.0044	37.4508	45.1655	51.5918	41.1443	31.3431	34.9674	46.1762	53.6424	56.4486	45.119	32.9097		1.22421	3.06847	0.439819	1.5475	1.23446		1.90821	3.17926	3.19799	2.89037	0.902971
29.0302	39.2782	46.9282	50.5086	39.7829	31.532	35.1349	45.0394	50.7903	53.3114	42.5181	30.4694		1.22455	3.14531	0.441565	1.54939	1.23455		1.6658	2.63303	3.19834	2.89059	0.903541
29.5263	40.5318	46.7076	45.458	45.3852	31.4421	34.7029	47.6495	57.5552	51.4383	43.5584	30.9664		1.22465	2.49045	0.4418	1.54957	1.23478		2.15735	3.80799	3.19868	2.89061	0.903949
26.3699	43.9786	52.4148	51.8221	43.0941	32.6156	36.5812	48.8419	57.3669	54.4892	45.4355	31.4204		1.22475	3.05036	0.446282	1.55367	1.23495		2.01115	3.40954	3.19886	2.89073	0.90404
30.7409	40.5332	48.3204	43.9899	46.0297	32.2218	36.9041	48.4392	55.9311	60.8254	42.6292	31.0564		1.22485	3.20365	0.451476	1.5543	1.23515		1.8961	3.1276	3.19904	2.89101	0.904051
28.3955	32.3741	36.3309	52.7369	40.3758	31.7196	34.8988	43.9421	48.6726	57.6667	43.8953	31.1297		1.22505	1.96523	0.454596	1.55613	1.23541		1.5346	2.33735	3.20045	2.89147	0.904249
31.3086	39.2125	47.1099	49.3969	40.3364	31.7104	35.0766	47.4045	56.3579	55.2526	43.2704	30.2411		1.22513	2.89867	0.457743	1.55716	1.23544		2.03608	3.51484	3.20076	2.89167	0.904704
32.2903	39.0274	43.8495	48.8372	43.56	31.879	35.0419	48.8534	59.9149	54.9377	44.4916	31.7637		1.22536	2.16752	0.459052	1.55796	1.23547		2.33725	4.20915	3.20094	2.8917	0.905226
30.2006	38.1572	42.4726	50.8736	41.9137	32.2312	35.9909	46.0125	51.748	57.8036	43.3221	31.2577		1.22537	1.88381	0.465779	1.55819	1.23563		1.61699	2.54241	3.20126	2.8924	0.905271
29.0497	38.9414	45.5111	51.5412	34.461	31.2184	36.041	48.2835	56.9031	53.3518	45.554	31.2196		1.22546	2.64127	0.467221	1.56023	1.23599		1.95421	3.3301	3.20153	2.89245	0.905301
35.3962	50.2945	59.0527	43.5501	38.5642	31.6037	35.4631	47.745	56.5475	56.4995	46.9665	31.2493		1.22563	3.18004	0.468629	1.56188	1.23611		2.02317	3.47318	3.20153	2.89252	0.905324
28.3463	44.139	51.9819	45.2127	34.9889	31.3753	36.9814	48.9733	57.0518	53.9622	46.153	31.0757		1.2259	2.91775	0.474245	1.56192	1.23627		1.85983	3.11273	3.20157	2.89256	0.905447
28.2771	44.8139	55.1399	46.9114	39.3569	30.9368	35.7576	45.543	51.028	57.6895	45.0421	31.2556		1.2261	3.30966	0.475838	1.56585	1.23632		1.60853	2.51015	3.20201	2.89285	0.905686
30.2057	37.7566	45.5992	43.5689	43.8019	30.6258	36.9187	48.3755	55.762	55.7216	46.5098	31.1665		1.22662	3.18538	0.477292	1.56945	1.23673		1.82467	3.00108	3.20289	2.89289	0.905758
27.3728	38.7449	45.0629	43.9531	45.6603	30.4709	32.6061	43.8045	51.7693	56.7023	44.0496	31.0155		1.22675	2.48948	0.482159	1.57153	1.23681		1.97662	3.38249	3.20318	2.89302	0.905793
27.8907	47.6445	57.6988	40.7621	41.9746	32.3943	34.4575	45.9049	53.7983	55.5688	44.3527	29.437		1.2269	3.38904	0.486259	1.57165	1.23734		1.95998	3.31146	3.20333	2.89323	0.905834
30.2428	39.5158	48.7047	52.2574	43.3364	32.1838	35.6993	48.9797	59.1163	54.1179	47.4946	31.4787		1.22717	3.41754	0.48694	1.57494	1.23805		2.21382	3.90356	3.20345	2.89401	0.906012
29.0084	36.7035	41.4788	46.8483	41.3572	29.6145	35.8628	50.0649	61.4831	54.5054	44.4006	31.6021		1.22722	2.10949	0.490085	1.57587	1.23832		2.31245	4.17163	3.20399	2.8945	0.906071
30.255	42.2498	51.5355	40.3159	43.9492	32.5136	37.1497	49.4724	57.9569	56.306	43.7032	31.6138		1.22726	3.29895	0.493796	1.57657	1.23832		1.93233	3.26277	3.20462	2.89459	0.906147
27.6987	37.7113	45.4349	47.2824	41.8421	32.4774	38.5352	53.3099	64.8774	55.9258	46.0885	31.8851		1.22746	3.12711	0.494436	1.57865	1.23833		2.25718	4.02438	3.20513	2.89483	0.906173
29.3355	38.1936	43.6983	48.8327	44.4512	31.0735	36.8164	51.3566	63.0211	56.6894	45.8681	32.6016		1.22756	2.51836	0.494832	1.58364	1.23833		2.3334	4.2053	3.20519	2.89493	0.90618
27.9779	35.6256	42.0512	30.2649	39.5246	31.2689	36.898	46.65	51.8841	55.2843	43.069	30.0921		1.22786	2.51869	0.497315	1.58695	1.23875		1.5104	2.32107	3.20559	2.89494	0.906263
27.495	39.8053	46.2513	53.7135	42.846	31.7575	36.1675	46.744	53.1456	50.9967	43.5938	31.3423		1.22804	2.75403	0.497407	1.58764	1.2389		1.67893	2.69514	3.2056	2.89506	0.906434
30.05	40.9696	49.2342	49.4383	38.5	32.0669	34.9348	47.1142	55.896	54.8466	44.2368	32.6223		1.22814	3.17029	0.499308	1.58787	1.2391		2.03206	3.49723	3.20649	2.89537	0.90664
29.4253	40.221	46.379	47.8358	43.413	33.2423	35.852	47.9474	56.4093	57.0574	42.6665	31.0456		1.22866	2.36574	0.499395	1.58865	1.23956		2.02844	3.44754	3.20705	2.89563	0.906738
30.3205	36.3742	43.9237	35.1969	44.397	30.4003	37.3054	47.021	52.1369	57.4856	46.0814	30.8058		1.22866	3.14333	0.500026	1.59104	1.24098		1.52012	2.32057	3.20785	2.89568	0.906977
27.8051	40.4658	45.5698	48.629	42.5106	32.0759	37.9518	50.3016	58.6496	59.7115	47.4498	31.3028		1.22914	2.13601	0.500431	1.59332	1.2412		1.9591	3.28339	3.20799	2.89672	0.907023
28.705	37.6638	46.6249	53.6741	40.6761	31.8365	35.6525	48.9038	59.0104	54.5292	45.1435	31.3885		1.22919	3.37903	0.501956	1.59377	1.24131		2.22115	3.91522	3.20936	2.89698	0.907222
30.6006	34.6787	38.4198	40.1439	38.5958	31.9352	35.7348	46.2017	52.5482	52.22	46.9224	32.2382		1.22921	1.88345	0.503224	1.59499	1.24161		1.71106	2.74855	3.21011	2.89719	0.907336
31.2579	39.3591	45.5115	51.5784	35.62	32.2982	36.3445	46.7995	53.0124	61.348	44.6305	32.6049		1.22935	2.57133	0.506135	1.60009	1.2417		1.71101	2.72778	3.2102	2.89738	0.90739
31.3393	33.9412	37.525	46.9148	44.8115	31.8887	36.4182	47.6215	54.7799	59.01	45.0379	33.8015		1.22941	1.79342	0.506858	1.60104	1.24196		1.80932	2.96541	3.21042	2.89758	0.907457
30.0698	43.6477	51.0785	43.3828	42.5028	32.3761	34.729	47.0173	55.9961	52.332	43.3916	32.0861		1.22969	2.76681	0.509743	1.60242	1.24251		1.99762	3.45723	3.2105	2.89764	0.90746
30.7076	35.112	39.8155	50.7678	38.3693	32.4549	35.3098	47.4123	56.0043	54.7898	44.0923	31.6511		1.22976	2.08118	0.513218	1.60282	1.24279		2.01014	3.4372	3.21057	2.89799	0.907759
29.3331	44.1659	51.5327	54.3749	43.4418	31.4852	36.963	47.9853	54.8004	55.7836	43.6304	31.6496		1.22993	2.9252	0.513565	1.60374	1.24287		1.77724	2.87611	3.21071	2.89849	0.908123
31.5304	34.4857	38.1006	44.8859	41.7449	31.3147	35.1397	49.2817	60.8007	54.0635	42.3877	31.7605		1.23	1.83772	0.513862	1.60552	1.24287		2.46959	4.48112	3.21095	2.89858	0.908477
35.9053	39.2764	44.0043	48.8592	43.4171	30.4769	35.4587	48.0936	57.3832	56.9839	43.109	30.9987		1.23007	2.24979	0.514468	1.6062	1.24291		2.11177	3.66443	3.21105	2.89859	0.908584
26.9897	40.3485	48.0996	47.1662	40.3314	31.0889	36.1411	48.8654	58.1215	52.9467	45.6832	30.6469		1.23009	2.90936	0.519627	1.60684	1.24293		2.136	3.68978	3.21105	2.89877	0.908901
27.0494	39.2621	45.256	51.6909	39.6813	31.2275	35.9198	45.3379	50.3411	57.324	42.6019	32.6345		1.23037	2.43126	0.522662	1.60823	1.24296		1.59691	2.44525	3.21161	2.89911	0.909553
31.6215	41.9314	48.4215	49.0965	43.337	30.769	35.422	47.8279	56.8098	51.6593	44.2725	31.6796		1.23054	2.75488	0.525979	1.60832	1.2433		2.06307	3.55675	3.21233	2.89912	0.909973
26.8226	39.5943	47.5921	51.4757	42.2916	31.3895	34.7211	48.6746	60.0267	57.4128	43.938	31.6726		1.23074	3.21882	0.527756	1.6096	1.24432		2.34176	4.24696	3.21266	2.8995	0.910051
30.384	38.6639	44.4771	42.7186	39.7125	31.2595	37.4829	52.5683	64.8558	55.0381	41.8882	30.8136		1.23088	2.7072	0.52858	1.61001	1.24437		2.43153	4.41208	3.21276	2.89963	0.910082
28.9504	39.2889	44.5098	43.8435	33.8373	31.9321	33.0785	43.7395	50.8787	58.2835	44.0933	28.7601		1.23092	2.39251	0.529167	1.61253	1.24439		1.87252	3.12646	3.21354	2.90015	0.910113
25.5247	38.7438	46.9581	46.8252	43.6134	29.1771	38.0855	52.0017	62.4611	55.8153	46.7136	32.2472		1.23103	3.11262	0.530307	1.61371	1.24458		2.19657	3.84751	3.21369	2.90016	0.910357
31.7671	36.1688	42.3802	51.5271	41.7728	30.3931	33.2667	43.9715	51.1291	55.5313	45.3738	31.2168		1.23117	2.56825	0.530671	1.61516	1.24479		1.87329	3.12583	3.2138	2.9003	0.910365
34.0757	39.2438	48.5988	48.6025	38.9412	31.6198	36.4857	48.4091	56.5022	55.3885	45.5893	31.3754		1.23132	3.56938	0.531798	1.6171	1.24509		1.98123	3.32601	3.21399	2.90045	0.911372
33.9039	37.6824	45.1838	49.0403	44.1008	30.7016	35.6176	49.5124	60.5476	54.4752	42.929	32.7735		1.23134	2.94253	0.534034	1.61938	1.24516		2.32827	4.17738	3.21434	2.90051	0.911417
32.7779	43.3595	52.6299	51.0854	43.3547	31.5841	34.7402	43.9882	48.9975	55.628	45.9689	31.2296		1.23146	3.44347	0.536301	1.62028	1.24595		1.53504	2.36651	3.21508	2.90097	0.911518
32.5981	37.1041	44.5592	48.2211	43.9951	31.8427	35.8835	46.7271	53.5276	55.2136	45.1964	32.4475		1.23162	3.05239	0.538094	1.62069	1.24604		1.78534	2.90499	3.21582	2.90105	0.91154
27.1127	45.0328	52.9433	51.4524	32.0236	30.2274	35.6166	46.7659	54.0183	52.7455	44.2379	31.6863		1.23168	2.72291	0.540341	1.62104	1.24625		1.9077	3.14862	3.21632	2.90113	0.911586
30.197	36.2136	43.5556	38.7879	43.2759	30.5618	34.272	45.0235	52.0324	52.2477	45.6866	31.9083		1.23171	2.98262	0.543547	1.62491	1.24626		1.85832	3.06975	3.21721	2.90136	0.912285
32.6666	38.4389	44.5776	53.2916	33.9871	32.431	37.5128	50.2233	59.1514	55.1724	44.4214	31.0164		1.23176	2.51632	0.545546	1.62563	1.24647		2.0047	3.41284	3.21922	2.90158	0.912478
31.9897	35.6254	42.5406	57.8346	43.423	31.5954	35.0535	45.5889	52.1581	55.7409	42.9917	30.7317		1.23185	2.71203	0.545654	1.62596	1.24658		1.75412	2.84787	3.21945	2.90174	0.913022
32.8788	39.6483	46.5883	49.1698	40.8585	30.5189	34.8047	47.7167	57.549	54.5459	43.3582	31.4313		1.23201	2.71115	0.546622	1.62616	1.24661		2.15705	3.79959	3.21963	2.90177	0.913037
27.4201	36.8926	43.3956	51.4403	44.1829	33.0326	35.7011	48.6563	58.3352	50.0137	44.6531	30.9496		1.23211	2.68934	0.547582	1.62769	1.24682		2.13799	3.73528	3.21972	2.9018	0.913045
29.5491	42.377	50.3529	47.7673	40.3606	29.8581	36.2649	48.2009	56.3584	55.4423	44.789	29.0924		1.23213	3.14	0.550639	1.62843	1.24702		2.011	3.38537	3.21981	2.90339	0.913115
29.3636	43.4745	53.7715	39.7778	41.6393	31.3666	35.2811	45.23	51.009	54.1713	47.331	32.5084		1.23221	3.63936	0.554849	1.63162	1.24723		1.64954	2.60768	3.21997	2.90397	0.913181
28.9852	46.7611	55.3226	43.4465	27.645	32.4917	34.1068	43.4687	48.7357	52.236	44.0879	30.3697		1.23243	2.98857	0.557434	1.63378	1.24756		1.59801	2.49705	3.22014	2.90404	0.913245
33.152	38.065	42.9304	49.2644	42.2812	31.3048	37.1421	46.8976	52.0917	54.2359	46.6876	31.7629		1.23271	2.25148	0.558778	1.63479	1.24761		1.56482	2.39798	3.22037	2.90415	0.913477
34.0828	38.8008	46.6319	49.9781	41.4069	31.5863	36.2932	50.3113	61.3536	54.3026	44.198	32.0918		1.23277	3.04656	0.561522	1.63507	1.24777		2.32001	4.14751	3.22045	2.9042	0.913665
35.5158	37.555	43.8046	35.1861	40.8321	32.5132	34.0636	44.2228	50.5051	56.233	44.3501	32.4327		1.23316	2.68626	0.562861	1.6351	1.24786		1.70756	2.76351	3.22065	2.90434	0.913762
29.1559	38.7503	47.7125	54.422	38.6857	31.8944	35.6553	47.5931	55.8853	53.2059	45.526	32.7914		1.23354	3.5007	0.567217	1.63606	1.2479		1.98721	3.36757	3.22085	2.90449	0.914074
30.8949	38.6991	47.2026	32.7408	40.6803	31.3266	35.663	47.4022	55.4261	52.554	45.3047	31.3514		1.23362	3.24094	0.567382	1.63621	1.24793		1.92934	3.24805	3.22097	2.90458	0.914352
31.6275	35.5113	42.9306	41.0759	41.5587	32.2231	36.0425	48.0623	56.3804	52.6812	45.3639	30.9506		1.2339	2.90611	0.568006	1.6378	1.24797		1.90882	3.22979	3.22143	2.90484	0.914444
29.0912	40.3133	46.5206	52.5922	20.7172	31.373	35.971	49.9599	61.0413	59.3429	44.1255	31.5614		1.23391	2.55036	0.570011	1.63846	1.24808		2.32887	4.17372	3.22146	2.90507	0.91473
26.823	38.7288	47.8529	47.487	42.0316	30.5	34.4468	43.4495	48.212	55.3257	44.3704	31.8022		1.23472	3.39944	0.572742	1.63864	1.24828		1.54448	2.36152	3.22154	2.90525	0.914839
31.7766	39.5133	48.1865	42.8844	40.2407	31.2454	37.2821	48.3811	55.2312	49.7155	43.4703	31.1647		1.23511	3.14491	0.573031	1.64024	1.2486		1.75345	2.83565	3.22166	2.90532	0.915
30.4901	43.6398	53.5115	48.0317	39.869	32.2485	36.402	46.4622	52.1686	54.3166	43.4214	31.4699		1.23512	3.57638	0.573855	1.64086	1.24972		1.67675	2.62783	3.22189	2.90611	0.915049
27.5984	39.9527	45.0419	47.0226	41.9552	30.3527	35.3092	48.7647	59.2456	59.5686	42.6394	29.5911		1.23515	2.18292	0.574482	1.64144	1.24984		2.32122	4.12932	3.222	2.90635	0.915174
29.6659	38.9048	43.6932	47.2212	41.934	32.9148	37.1337	49.415	57.8473	53.3127	44.9974	32.2828		1.23528	2.2081	0.574816	1.64183	1.24992		1.93379	3.26153	3.22253	2.90665	0.915436
26.8265	40.9315	49.9942	49.4613	40.3788	31.7853	34.0494	44.7578	51.7563	53.0259	44.9924	32.1678		1.23532	3.12389	0.576346	1.64188	1.24995		1.80625	2.98671	3.22257	2.90668	0.915598
28.9961	43.8237	52.9278	49.8896	26.906	32.2054	35.935	47.2818	54.7274	53.6299	45.3894	31.2351		1.23532	3.47703	0.579787	1.64599	1.25035		1.89562	3.13949	3.22305	2.90705	0.915812
29.5557	44.5174	53.5901	49.1955	44.8566	29.8109	34.4223	47.6337	57.9859	53.0746	45.3998	30.2377		1.23539	3.27363	0.580898	1.64672	1.25046		2.26244	4.03525	3.22335	2.90814	0.916032
25.4868	38.9554	46.1943	49.6911	40.3218	31.9316	34.8566	43.8533	48.5348	54.2783	43.9523	31.6045		1.2356	2.86401	0.583504	1.64829	1.25113		1.52728	2.32202	3.22374	2.90839	0.9161
29.4518	43.961	54.2309	49.8514	41.4166	32.0284	35.7699	47.0281	54.3915	55.3529	43.3981	31.7745		1.23561	3.72898	0.583783	1.64837	1.25132		1.80095	2.97887	3.22465	2.90858	0.916126
29.173	35.6901	39.9586	40.3495	38.3064	31.5451	35.8376	50.5104	62.6263	54.9621	47.74	32.0198		1.23567	2.0158	0.584208	1.64932	1.25166		2.4405	4.45571	3.22483	2.90864	0.916261
32.9366	40.9034	50.4239	51.5328	45.2418	32.8207	33.9101	46.5763	56.2775	55.8831	45.0755	31.4861		1.23579	3.42304	0.585923	1.65141	1.25198		2.18336	3.85562	3.22509	2.90907	0.916528
32.2411	36.3454	44.3703	41.294	39.742	30.0928	35.4432	47.9246	57.0056	53.6262	44.741	31.7168		1.23585	3.17625	0.593227	1.65173	1.25205		2.10341	3.63378	3.22528	2.90909	0.916805
29.169	42.6122	51.2923	48.9338	33.2273	31.3172	35.3882	45.0245	50.3932	55.2163	45.6143	29.3267		1.23592	3.41238	0.594233	1.65198	1.25224		1.61754	2.51874	3.22583	2.90913	0.916841
29.9803	41.1677	48.6702	46.4202	41.7719	31.0592	36.514	48.8503	57.4923	52.7831	46.1117	30.8369		1.23602	3.10101	0.595417	1.65318	1.25249		2.00546	3.41035	3.22596	2.9093	0.917304
29.0527	39.2637	48.2686	44.151	43.3598	30.402	34.2732	44.7875	51.4866	51.4528	44.8295	32.0211		1.23604	3.43115	0.595721	1.65385	1.25253		1.78224	2.91777	3.22661	2.90933	0.917636
29.725	40.0609	45.4025	45.5768	43.7579	31.6604	37.5368	49.3421	57.0575	54.1618	46.1273	30.2635		1.23604	2.29337	0.59592	1.65514	1.25265		1.90961	3.15763	3.22678	2.90987	0.917709
26.9158	39.6057	44.8175	49.4336	44.623	31.4363	34.5073	43.7688	48.8375	53.0737	44.8213	31.9938		1.23612	2.20898	0.59684	1.65517	1.25291		1.59528	2.46834	3.22728	2.91084	0.91789
27.6419	38.8537	45.0849	40.9063	32.529	31.3259	35.5031	46.1124	52.6869	56.1544	45.7567	32.361		1.23621	2.57679	0.596865	1.65586	1.25328		1.81397	2.93808	3.22757	2.91113	0.918034
29.6261	40.8054	46.9773	49.4401	42.4752	32.0095	33.7291	45.5518	54.1178	54.1196	44.5844	32.1264		1.23629	2.6532	0.597806	1.6564	1.25339		2.00301	3.45426	3.22758	2.91117	0.918282
28.6358	38.0415	44.6316	51.9032	43.8634	30.5292	35.065	49.5055	61.4848	52.0871	41.6154	30.4001		1.23669	2.83339	0.59811	1.65676	1.25349		2.4175	4.42296	3.22791	2.91123	0.918509
28.6022	36.8388	45.0403	45.4962	37.2815	32.195	35.1162	46.8537	54.994	55.5432	49.4412	30.9317		1.23697	3.17442	0.601017	1.65687	1.25393		1.90957	3.2339	3.22862	2.91144	0.91857
30.8779	38.3129	44.0833	49.2765	40.789	31.7523	35.1642	45.8619	52.6183	54.1635	43.4755	31.6224		1.23704	2.55136	0.601489	1.65848	1.25413		1.73768	2.83517	3.22901	2.91177	0.918648
29.0051	30.6985	34.2046	48.3602	32.4921	30.7506	36.3075	50.976	62.9606	57.0606	43.4456	30.9031		1.23712	1.79418	0.601645	1.66178	1.25423		2.44467	4.44205	3.22919	2.91189	0.919044
28.0584	40.4813	46.1337	48.7897	39.0572	31.9207	33.8424	42.8739	47.7813	55.4689	45.2617	31.3688		1.23723	2.48478	0.603027	1.66486	1.25457		1.54211	2.38006	3.22941	2.9121	0.919278
32.3645	38.1965	46.561	43.5173	36.4972	30.9113	35.4164	48.3494	58.0646	55.1253	45.4156	31.446		1.2375	3.3153	0.608868	1.66618	1.25497		2.16262	3.78718	3.22956	2.91241	0.919734
26.2512	45.7168	53.1725	46.714	39.4801	31.455	35.3309	47.2085	55.4905	51.6924	44.2053	31.8632		1.23755	2.94484	0.61369	1.66643	1.25498		1.96831	3.34079	3.22975	2.91241	0.920212
29.0724	38.3426	42.6061	46.0716	41.8605	31.552	34.5914	44.8322	51.1146	56.2758	47.3411	32.9576		1.23766	1.99923	0.616759	1.66799	1.25502		1.7597	2.83924	3.22996	2.91249	0.920557
31.1679	37.7339	43.9826	43.1805	43.7173	31.9361	38.6605	52.3605	62.3841	53.7296	44.0419	31.4048		1.23768	2.62435	0.628156	1.67112	1.25517		2.1002	3.63682	3.23071	2.9126	0.921134
30.3069	41.7761	49.0554	43.5142	38.322	31.8119	35.5655	46.8255	54.2338	54.5251	44.7228	30.0722		1.23775	2.81261	0.628688	1.67295	1.25569		1.86749	3.09617	3.23109	2.91285	0.92124
32.876	41.2395	49.305	48.5978	43.5845	32.4858	34.266	47.631	58.244	57.2005	45.7879	31.11		1.23778	3.09368	0.628909	1.67312	1.25638		2.26476	4.06316	3.23129	2.91296	0.921538
30.7614	31.8707	35.7493	47.0275	44.9247	30.2753	37.5949	47.9953	53.9018	49.5311	44.7223	31.0189		1.23785	1.95305	0.634294	1.6732	1.2564		1.67063	2.61939	3.23162	2.91387	0.92169
31.0938	37.0842	45.051	42.7875	40.8062	32.1137	36.2489	45.808	50.924	53.2209	41.0359	30.7783		1.2379	3.07426	0.634648	1.6741	1.25679		1.5355	2.35729	3.23187	2.91409	0.922152
31.2172	38.4657	42.8938	44.696	41.9716	31.7368	34.5492	46.8002	55.7687	54.5752	44.7838	31.5089		1.23793	2.06682	0.634795	1.67563	1.25756		2.06354	3.5742	3.23193	2.91435	0.922164
28.3159	40.6772	46.517	49.1132	40.9695	31.3658	34.4059	44.1918	49.9327	55.3798	43.8748	31.2294		1.23804	2.47135	0.635302	1.67606	1.25759		1.68221	2.66907	3.23254	2.91481	0.92238
28.4775	38.7373	43.7648	47.3744	38.9342	31.3725	35.1131	45.7517	52.4419	54.8732	45.0615	31.9691		1.23812	2.11425	0.635993	1.67658	1.25786		1.77673	2.89407	3.23269	2.91498	0.922397
28.1801	42.5909	51.914	48.1368	41.0538	32.3316	35.692	48.9551	59.069	55.1063	45.7066	30.8685		1.23836	3.40774	0.637926	1.67689	1.25839		2.20785	3.89147	3.23279	2.9152	0.922686
32.0731	38.3681	44.3566	40.5644	42.5273	32.4142	34.5024	47.994	58.7298	59.337	46.6553	31.1811		1.2385	2.52594	0.638899	1.68032	1.25842		2.31114	4.15022	3.23286	2.91523	0.922738
27.8687	34.8768	41.1645	46.7035	42.4414	31.6639	34.8638	46.9323	55.5781	57.6548	46.5619	30.1939		1.23876	2.67829	0.64026	1.68079	1.25868		2.01568	3.45969	3.23338	2.91564	0.9228
30.4885	39.3496	47.1736	45.396	41.1795	31.4644	39.629	49.7951	55.0419	55.9387	42.5204	31.8549		1.23887	2.94008	0.642632	1.68215	1.25898		1.54493	2.34229	3.23342	2.91576	0.922831
30.1009	43.0621	53.5816	48.2862	41.2817	31.5037	36.4784	48.0418	55.6592	55.2533	44.4966	32.5439		1.23891	3.79016	0.643721	1.68437	1.25931		1.83843	3.04949	3.23352	2.91598	0.92297
24.9142	35.5584	40.8942	45.852	43.2017	31.1266	35.2609	44.7116	49.8749	56.2666	41.8733	30.9113		1.23894	2.38499	0.644639	1.68528	1.25965		1.61092	2.49101	3.23371	2.9166	0.923148
31.781	41.4952	46.1535	48.1484	38.1492	31.224	36.1894	47.8276	55.6046	51.7056	41.8373	31.1683		1.23895	2.13005	0.646163	1.68569	1.2602		1.8233	3.04168	3.23383	2.91683	0.923195
29.1671	40.2018	45.3874	51.3493	42.2481	32.0953	35.6886	49.7222	60.9404	56.1793	45.7127	32.2556		1.23908	2.3393	0.647541	1.68597	1.26029		2.35431	4.23631	3.23394	2.91694	0.923832
34.1253	41.4659	49.7276	49.6046	42.3623	30.6731	37.5727	48.1173	54.2081	53.8928	45.9091	32.4605		1.23924	3.14731	0.647738	1.68635	1.26042		1.66837	2.63206	3.23508	2.91753	0.92401
29.0296	36.7945	45.3303	48.1888	41.3084	32.0746	34.7212	46.294	54.2986	55.307	44.362	30.9084		1.23925	3.11469	0.650602	1.68703	1.26062		1.92056	3.24896	3.23536	2.9178	0.924184
27.6597	38.7332	44.147	47.4776	38.6663	32.0334	36.411	45.7813	50.6382	58.4477	46.5354	31.7887		1.23942	2.50339	0.654386	1.68971	1.26069		1.53714	2.33388	3.23546	2.91781	0.924799
30.7746	37.4942	42.5333	22.7282	41.381	31.9182	34.3626	45.3311	52.6067	56.3338	44.8948	31.2798		1.23977	2.29296	0.656565	1.69236	1.26081		1.90858	3.17458	3.23548	2.91809	0.924833
27.1215	38.3271	45.12	40.5044	42.4172	32.416	36.3741	45.6787	50.4627	55.6853	43.6978	31.0843		1.23985	2.6559	0.659592	1.69343	1.26122		1.56937	2.37625	3.23572	2.91943	0.924906
30.9202	40.6321	49.9455	49.8874	40.0166	31.018	35.5511	45.3797	50.9571	56.5665	46.1792	31.0069		1.23986	3.43448	0.659813	1.69474	1.26167		1.59349	2.49774	3.23574	2.91965	0.925444
29.4148	38.0021	42.5032	51.4415	40.1983	32.1875	36.9056	48.8906	56.9761	54.2159	44.3691	30.8919		1.24019	2.00832	0.659832	1.69552	1.26217		1.96164	3.28502	3.23653	2.91969	0.925541
31.8985	47.7357	57.4218	47.9522	35.5382	31.645	35.5522	48.5258	58.2659	52.5051	45.8779	31.251		1.2403	3.28234	0.66261	1.69969	1.2622		2.15734	3.77698	3.23707	2.9198	0.925597
28.7991	33.1826	37.4513	46.2655	38.6385	32.2879	37.284	47.9889	54.3367	56.8496	45.3761	31.8497		1.24047	2.02262	0.664774	1.7002	1.2622		1.70026	2.70849	3.23718	2.9201	0.925616
29.337	35.0146	39.8591	41.9935	39.388	32.0386	35.7311	47.3487	55.1957	55.5146	45.0179	31.8279		1.24055	2.17242	0.665858	1.70074	1.26241		1.91195	3.20334	3.23812	2.92071	0.925741
26.2114	42.447	49.0465	51.7433	38.7114	31.7021	35.341	47.7335	56.7155	58.6322	45.7157	30.1852		1.24064	2.57903	0.667002	1.70115	1.26288		1.99443	3.43998	3.23837	2.92086	0.925743
32.8649	38.9545	43.5437	47.4689	44.6704	31.946	33.2977	42.7076	48.187	54.9435	44.606	32.3707		1.24071	2.17252	0.667068	1.7029	1.26309		1.64096	2.59651	3.23856	2.9209	0.927378
28.6427	42.0249	49.4436	44.18	41.2962	30.1502	36.17	45.4409	50.2202	55.0746	47.2694	30.7074		1.24079	2.78917	0.67057	1.70337	1.26311		1.53131	2.32074	3.23881	2.921	0.927391
31.955	36.5414	43.3612	44.0269	41.425	31.6534	34.4881	47.3957	57.2985	55.0885	44.1124	30.6042		1.2408	2.60839	0.67242	1.70408	1.26312		2.11815	3.74321	3.23928	2.92101	0.927456
29.433	38.1024	46.0947	47.6802	35.5396	32.5329	35.0911	45.1109	51.0152	56.8642	45.0277	30.3913		1.24081	3.17447	0.674562	1.705	1.2633		1.66643	2.64841	3.23945	2.92193	0.92749
27.9017	40.3295	48.2369	48.2374	43.1971	31.282	37.0792	49.3758	57.8405	52.4188	48.1366	31.8079		1.2409	3.03786	0.675241	1.70799	1.26372		1.99247	3.36404	3.23997	2.92231	0.927608
30.9762	38.4271	42.9617	15.3959	45.5948	31.8354	38.8463	49.9386	56.4752	54.3065	43.9588	31.9061		1.24095	2.21781	0.675927	1.70865	1.264		1.65919	2.63693	3.24053	2.92262	0.92767
31.5739	41.256	48.8292	43.0304	40.1261	31.4682	36.3696	50.5737	61.8651	54.8665	47.405	31.146		1.24098	2.71509	0.676543	1.70889	1.26404		2.31676	4.15843	3.2409	2.92274	0.928233
30.3816	38.7718	47.5257	47.6551	43.2047	30.6033	33.5404	42.6419	47.6912	55.8601	43.3929	30.7866		1.24099	3.21344	0.676695	1.71014	1.26428		1.54172	2.39704	3.24149	2.92274	0.928508
27.3627	35.1502	40.0445	48.5362	39.6184	31.7581	35.3595	44.3672	48.9724	54.8402	42.7342	30.6548		1.241	2.16731	0.678151	1.71068	1.26429		1.50409	2.27307	3.24204	2.92287	0.928524
26.5398	42.1047	51.3407	53.3891	28.8728	32.3444	36.3074	48.2682	56.4497	55.463	45.3703	30.7671		1.24114	3.65949	0.678599	1.7114	1.26438		1.95361	3.28993	3.24217	2.92293	0.928539
26.8399	37.0568	43.2608	44.5127	39.7699	31.4919	35.2058	47.9825	57.5289	53.6623	44.2646	32.4937		1.24117	2.67817	0.68043	1.71148	1.26477		2.09336	3.65746	3.24222	2.92307	0.928753
28.9284	39.9207	48.3551	21.3869	38.6074	30.9635	35.9634	46.073	51.9239	55.2703	44.2408	31.0844		1.24124	3.21651	0.681336	1.71162	1.26483		1.62659	2.56797	3.24335	2.92325	0.928973
29.8712	32.3032	36.051	47.1864	39.9701	30.7345	34.5351	47.7088	57.979	56.4468	45.0336	31.2935		1.24127	1.81404	0.681769	1.71167	1.26535		2.28314	4.06307	3.24338	2.92341	0.929003
32.3244	33.4564	37.565	47.931	45.9849	30.4268	35.7136	46.4813	53.2177	54.1328	42.6348	31.9928		1.24141	1.97993	0.684022	1.71276	1.26545		1.7605	2.8619	3.24386	2.92385	0.929122
28.8516	40.5345	48.9953	52.6055	37.9066	31.7026	33.4924	42.5715	47.602	51.5392	44.8998	31.2082		1.24142	3.12597	0.684133	1.71799	1.26552		1.5784	2.45296	3.244	2.92389	0.929235
30.1455	45.5315	51.1989	45.4982	33.1695	31.44	36.9463	46.9747	52.5402	53.7425	46.3383	30.1895		1.24165	2.36198	0.685147	1.71842	1.26559		1.5649	2.43338	3.2441	2.92433	0.929587
28.0976	35.9315	40.36	52.7147	40.1434	30.6578	34.3328	43.5083	48.5032	55.3016	44.514	30.9486		1.24181	1.96228	0.685668	1.7187	1.26559		1.54639	2.38819	3.24422	2.92435	0.92989
32.7171	37.5137	42.1796	47.2638	42.1636	32.058	35.4278	45.4194	51.224	54.3341	45.4197	31.82		1.24182	2.08515	0.686051	1.71968	1.26632		1.66558	2.63319	3.24448	2.92468	0.930721
30.1106	38.363	44.4116	44.3323	40.3831	32.1033	37.0138	48.4672	55.8298	54.5397	45.3839	31.2501		1.24192	2.44065	0.686756	1.72024	1.26653		1.82623	3.0002	3.24475	2.92472	0.930898
29.6382	36.6441	41.7067	52.1403	42.1843	32.5485	37.7378	49.7285	57.646	56.1385	43.9071	32.154		1.24214	2.30499	0.686923	1.72321	1.26677		1.89961	3.15392	3.24498	2.92492	0.930905
25.3755	45.4634	56.3209	49.0565	41.4548	31.0149	35.3364	46.6122	54.0893	54.6368	44.5438	30.6158		1.24216	3.65467	0.687437	1.726	1.26706		1.87654	3.12088	3.24536	2.92496	0.930985
28.3762	36.3878	42.4903	49.0411	40.4007	31.1902	36.4221	50.7448	62.1945	58.2492	47.1194	32.2179		1.2423	2.64768	0.689382	1.72783	1.26737		2.25461	4.05698	3.24558	2.92501	0.931028
30.8608	43.4855	52.1661	48.7614	41.0379	31.2671	37.4288	50.045	58.864	57.2454	42.7391	31.0934		1.24236	3.23595	0.692819	1.72821	1.26767		2.01299	3.42011	3.24577	2.92526	0.931037
29.7302	44.3164	54.2887	42.5561	37.3527	32.8215	35.9216	45.4054	50.4885	57.4042	46.4449	30.9399		1.24259	3.75113	0.693358	1.72887	1.26786		1.58251	2.43071	3.24644	2.92527	0.931314
33.1646	38.6702	44.8493	48.3702	38.9568	32.2908	36.1473	47.0706	53.921	52.6183	42.5408	31.2192		1.24266	2.73086	0.693414	1.7301	1.26819		1.78485	2.9042	3.2465	2.92554	0.931344
31.7321	38.9398	48.462	42.2187	36.8791	30.8595	36.3196	50.289	61.2546	55.8547	43.4278	30.8011		1.24275	3.543	0.693615	1.73022	1.26828		2.20041	3.92769	3.24689	2.92619	0.93144
29.361	42.465	50.3693	45.4308	40.7666	31.3641	38.8173	54.6098	67.5851	50.0615	44.2491	31.8554		1.24279	3.03108	0.695769	1.73072	1.26849		2.43935	4.44354	3.24732	2.92646	0.9315
27.723	37.0953	43.164	45.0104	43.3356	31.7792	36.315	51.0936	63.2384	59.3507	45.4783	30.7368		1.24286	2.58405	0.695931	1.73257	1.26876		2.45668	4.47554	3.24843	2.92659	0.931602
27.755	39.8189	46.5492	49.5909	35.3988	32.0411	35.4258	45.8751	52.2598	52.724	45.2485	30.979		1.24307	2.86471	0.696275	1.73456	1.26895		1.76816	2.84855	3.24887	2.92667	0.931909
28.1341	46.4211	55.1888	48.1154	40.5057	30.5949	37.2234	48.819	56.3243	55.0265	43.2001	32.2062		1.24307	3.11842	0.698707	1.73491	1.269		1.89564	3.12261	3.24915	2.92706	0.932228
30.333	38.971	45.4678	46.7058	42.0989	33.3084	33.9645	47.497	58.4309	52.0305	43.9963	32.4847		1.24323	2.64349	0.700048	1.73572	1.26905		2.3426	4.23534	3.24923	2.92727	0.932258
27.2846	36.6839	42.4468	44.5645	41.8766	31.6907	34.4878	48.0329	58.8499	54.3904	43.8758	32.0273		1.24332	2.34335	0.701145	1.7367	1.26925		2.27097	4.08456	3.2496	2.9274	0.932356
30.3849	37.0968	41.1002	30.4418	39.9298	32.7361	35.3696	46.7576	54.3761	57.2704	47.1229	31.3013		1.24336	1.8629	0.701683	1.73837	1.27002		1.87059	3.12201	3.24963	2.92768	0.93249
32.1187	37.2399	41.155	50.7239	37.9799	31.9647	35.0236	47.2729	56.1305	54.4985	43.607	31.3085		1.24352	1.8162	0.702172	1.73852	1.27002		2.07247	3.57109	3.24979	2.92777	0.932514
31.2899	41.7626	48.0731	46.7898	39.8753	31.4946	35.5502	46.6673	53.8911	58.0052	41.5005	29.639		1.24359	2.55094	0.703536	1.74039	1.27023		1.84684	3.04691	3.25013	2.92805	0.933138
26.5738	39.1228	44.7746	49.6026	34.3865	31.1806	37.51	50.4917	59.7897	57.2869	48.7979	30.8106		1.24366	2.46189	0.704998	1.74064	1.27027		2.10904	3.61964	3.2513	2.9282	0.933507
28.9747	41.1912	51.1472	51.3729	41.9133	30.7899	37.3746	48.2592	54.8172	54.7842	45.3962	31.7011		1.24398	3.68102	0.706045	1.74147	1.27034		1.71702	2.75155	3.25186	2.92845	0.933705
27.4975	38.5924	45.0318	46.4744	40.7307	31.6154	36.0195	49.1897	59.0942	53.9153	44.2476	31.9562		1.24416	2.44927	0.706704	1.74309	1.27105		2.11872	3.71209	3.25187	2.92849	0.933797
32.236	37.6234	42.4233	48.8158	39.4492	30.9354	36.8508	51.4762	63.2557	54.7485	45.3515	30.4998		1.24417	1.98793	0.707206	1.74574	1.27107		2.36334	4.26681	3.25195	2.92895	0.934108
31.4538	39.5289	46.4364	37.4203	42.753	30.5624	35.3859	49.4796	60.8634	52.1805	44.1782	31.0497		1.24423	2.6564	0.707641	1.74899	1.27109		2.33278	4.21702	3.25229	2.9291	0.934335
26.8037	38.6094	43.883	50.1917	41.3729	31.3941	39.6884	52.184	60.3595	55.3361	44.2184	30.6049		1.24427	2.24136	0.70919	1.75011	1.27126		1.89438	3.13381	3.25263	2.92912	0.934361
28.3525	39.0758	46.9083	46.0206	40.4496	31.2615	36.0691	50.8307	63.0161	56.313	45.9327	32.4223		1.24452	3.17302	0.709233	1.75045	1.27132		2.48469	4.53575	3.25277	2.92923	0.934386
28.2704	41.1423	47.8886	41.4008	40.9157	33.3552	34.7081	45.8897	53.3744	54.4438	44.0142	31.5791		1.24457	2.71142	0.709548	1.75096	1.27134		1.9063	3.18235	3.25331	2.92964	0.934461
29.9453	36.0752	41.4819	48.3939	41.8068	30.8898	34.8194	46.3459	54.2669	57.7636	44.2764	31.0672		1.24482	2.25243	0.709567	1.75138	1.27179		1.973	3.32885	3.25336	2.92988	0.934614
31.6216	40.9585	47.0263	46.5069	44.4876	32.9158	35.9457	45.3767	50.3909	57.6603	47.7279	31.1716		1.24509	2.50031	0.711882	1.75172	1.27181		1.52568	2.33685	3.25384	2.93025	0.935113
31.1199	40.3372	47.0883	45.9707	37.3923	32.0956	33.2529	46.0256	56.0409	57.4696	45.2295	32.0207		1.2451	2.79902	0.714643	1.75194	1.27219		2.22235	3.96491	3.2543	2.93046	0.935393
30.1042	38.8378	46.5384	44.214	39.5366	31.0945	38.1462	49.8349	57.273	53.3685	45.3877	31.8185		1.24512	3.05351	0.71843	1.75395	1.27249		1.83745	3.00671	3.25439	2.93052	0.935564
33.3898	45.5623	52.0017	36.0384	42.0908	31.3747	33.869	45.2194	53.1107	54.7241	45.1283	30.795		1.24535	2.61428	0.719045	1.75486	1.27288		1.93489	3.28011	3.2546	2.93052	0.93561
25.4172	42.6161	52.6054	48.3416	40.649	30.7772	35.7243	49.8634	61.2257	53.0695	44.4325	31.3701		1.24543	3.60741	0.720465	1.75554	1.27343		2.32093	4.18605	3.25486	2.93065	0.935613
26.9015	38.1981	42.2793	46.3702	40.1549	32.9227	40.0227	51.2118	57.6458	56.4314	46.6245	31.7682		1.24544	1.93631	0.720662	1.75663	1.27357		1.67275	2.63462	3.2549	2.93073	0.935656
30.5405	41.8383	49.623	40.4761	46.6842	31.086	34.4327	46.2511	54.6522	53.1746	43.3395	31.2381		1.24587	2.89693	0.721359	1.75709	1.27358		2.04576	3.49997	3.2551	2.93087	0.935837
31.2884	37.8087	45.245	40.5509	39.0149	31.9661	35.5702	44.9329	49.9317	56.7771	46.2688	31.9079		1.24604	2.91038	0.724091	1.75737	1.27359		1.53655	2.35692	3.2555	2.93166	0.935847
28.9351	38.6469	43.1273	46.4027	39.5482	31.8676	33.6071	45.3705	53.8827	55.5431	47.3185	31.3903		1.2462	2.09316	0.725227	1.76048	1.2738		2.01153	3.46711	3.25552	2.93178	0.935895
30.0736	37.3943	41.5343	26.3568	40.5731	30.9186	39.2603	53.2186	63.4611	52.5605	44.8575	31.0694		1.24643	1.89623	0.727684	1.76224	1.27391		2.18956	3.79624	3.25613	2.93258	0.936137
28.0637	42.6462	52.5014	35.9519	43.0144	31.7343	38.0143	49.7467	57.2686	58.4853	45.188	31.1435		1.24645	3.63342	0.732463	1.76259	1.27425		1.79444	2.94488	3.2563	2.93278	0.936532
30.536	31.6162	35.4147	44.4272	39.454	31.853	37.4967	49.8479	58.2954	53.198	44.7204	31.1565		1.24674	1.84994	0.736536	1.76427	1.27444		1.94341	3.2726	3.25717	2.93288	0.936558
29.9971	37.5405	42.4201	46.7935	31.6593	31.4525	35.2632	44.9272	50.3537	56.7084	46.1436	31.8882		1.24677	2.21772	0.739771	1.76517	1.27461		1.65789	2.58883	3.25732	2.93309	0.936653
31.7738	42.7587	52.1349	48.3854	34.9418	30.1194	37.1434	49.6294	58.3351	55.2052	44.3689	32.0122		1.24678	3.31466	0.742312	1.76576	1.2754		2.01158	3.41413	3.25741	2.93323	0.936833
30	38.7648	47.6328	46.0008	29.993	31.9502	36.1348	47.5103	54.9519	56.6019	46.862	31.8657		1.24679	3.36556	0.742585	1.76724	1.2761		1.83672	3.03829	3.25757	2.93334	0.9373
33.2619	44.2013	52.4731	35.1627	42.11	31.6237	36.2281	46.1665	51.7539	52.848	44.9071	31.7519		1.24696	3.06333	0.744351	1.76849	1.27652		1.66787	2.60555	3.25785	2.93376	0.937317
29.5383	39.4949	44.2435	52.4029	41.2307	30.6698	34.8723	46.169	53.7716	56.111	43.3298	30.9581		1.24706	2.09416	0.745332	1.76872	1.27719		1.91729	3.20764	3.25793	2.93417	0.937961
28.1458	39.3274	44.9262	51.6906	39.3602	31.6298	38.4699	53.106	64.4913	52.9686	45.2296	32.2608		1.24715	2.47521	0.746497	1.77054	1.27809		2.21938	3.94581	3.25798	2.93418	0.938113
30.9169	39.8303	46.9392	50.4532	39.6258	31.3858	34.748	47.3671	56.8013	53.9139	43.4131	31.5367		1.24715	2.90379	0.747649	1.77137	1.27826		2.15667	3.76902	3.25846	2.93429	0.938392
25.4717	39.7907	46.7177	45.3067	35.6313	30.964	36.0651	47.5206	55.0821	56.2154	43.8718	32.2617		1.24716	2.86808	0.74859	1.77192	1.27833		1.88124	3.12301	3.25909	2.93451	0.938514
27.866	34.6081	40.2167	52.2284	40.4826	32.7756	36.0566	49.4347	59.6231	54.3683	46.6867	31.6133		1.24719	2.42022	0.749487	1.77251	1.27843		2.1109	3.71848	3.25925	2.9346	0.939109
30.9719	40.55	46.2356	47.543	37.8294	31.6103	34.5643	44.1546	49.6201	52.5299	45.3883	32.5185		1.24734	2.47588	0.751975	1.77368	1.27854		1.65058	2.59126	3.25949	2.9346	0.939235
28.8807	34.4823	39.4275	48.0428	42.1732	31.8254	36.8238	48.2434	55.6007	55.7575	45.2352	32.2138		1.24751	2.18081	0.75495	1.77624	1.27866		1.86715	3.0701	3.25961	2.93488	0.939244
31.649	39.113	43.4546	50.7136	42.5365	31.5206	34.9207	46.961	55.5554	59.4749	44.8436	31.5592		1.24761	1.98325	0.756475	1.77778	1.27872		2.02136	3.4642	3.25965	2.93516	0.939286
30.7914	41.2565	47.5987	46.5435	41.4024	31.9046	34.5278	44.41	50.2489	56.8771	46.3439	31.2513		1.24826	2.54218	0.75918	1.78315	1.27912		1.65174	2.62768	3.25977	2.93526	0.939399
32.6581	36.2228	43.4809	49.0662	33.3052	32.6948	34.7387	46.9956	55.9287	49.873	42.8763	30.0947		1.24838	2.8415	0.763066	1.78475	1.27923		2.00553	3.4672	3.25987	2.93534	0.939472
27.9441	41.4281	49.5774	50.1145	42.8135	32.0646	37.1729	51.5073	62.7834	57.4396	43.5202	30.2087		1.24867	3.0967	0.763082	1.7869	1.27935		2.29252	4.09593	3.26038	2.93542	0.939547
31.7758	35.5721	42.3968	51.0953	36.5865	32.8722	38.3042	53.3689	65.4132	55.9918	45.5351	31.2133		1.24869	2.74376	0.763498	1.78811	1.27943		2.41049	4.33767	3.26071	2.93642	0.939701
27.7262	38.3138	45.2417	37.9564	42.0229	31.0138	35.179	45.2255	51.1468	58.8572	46.1693	31.7613		1.24877	2.8149	0.76637	1.78853	1.27951		1.64135	2.60873	3.26098	2.93647	0.939898
31.4463	43.3329	53.8815	56.777	38.9673	30.0999	36.2625	50.3319	61.4558	56.0739	45.4889	30.8675		1.24889	3.46316	0.76741	1.78953	1.27969		2.30248	4.12293	3.26113	2.93658	0.939919
27.0372	42.2707	49.5296	45.899	33.5334	30.8889	38.0871	50.9725	60.0106	55.1558	48.1166	32.2894		1.24915	2.84791	0.770931	1.79036	1.28013		1.98721	3.38108	3.26143	2.93691	0.939968
31.0411	34.5315	39.5662	47.7589	44.088	32.1563	34.8163	48.4365	59.2786	52.8524	45.5268	30.0677		1.24925	2.24291	0.771195	1.79057	1.28059		2.34604	4.21355	3.26208	2.93734	0.939986
31.2338	42.41	50.0558	40.0892	40.4027	31.3664	35.9343	46.1861	52.2211	53.7557	41.9399	30.5201		1.24928	2.91034	0.771285	1.79219	1.28075		1.67823	2.66618	3.26248	2.93758	0.940027
28.1215	32.2129	36.0771	45.7078	40.9217	30.6868	37.2167	51.5134	62.7243	51.7006	46.0102	32.3647		1.24953	1.88387	0.771468	1.79238	1.28081		2.27575	4.06031	3.26292	2.93761	0.940057
29.2391	42.6236	51.0834	53.4561	40.0857	30.3311	34.1322	44.7665	51.6506	58.4271	46.4714	32.5527		1.24953	3.04256	0.77334	1.7928	1.28098		1.81171	2.98452	3.26316	2.93769	0.940294
28.5224	34.6872	39.5056	48.3603	37.923	32.0454	33.9703	43.4861	48.9708	56.3084	42.9861	31.7227		1.24959	2.18315	0.77345	1.79309	1.28143		1.64822	2.5982	3.26369	2.9384	0.940461
29.5215	36.9548	40.9007	45.5721	40.7456	31.0011	34.2779	47.3858	57.6258	57.2462	43.1419	32.1609		1.24984	1.80738	0.77417	1.795	1.28154		2.25389	4.01465	3.26413	2.93875	0.940677
28.8937	37.7161	44.7183	46.5391	44.1913	31.84	34.8029	48.8308	60.2706	58.3749	43.4711	30.9844		1.24986	2.75627	0.7745	1.79588	1.2817		2.37822	4.31767	3.26415	2.939	0.940729
29.0663	39.6211	45.2535	27.6996	37.901	32.5337	36.5573	47.5721	54.4585	54.5985	44.5242	30.9851		1.24994	2.32166	0.774516	1.79628	1.28184		1.77622	2.88669	3.26465	2.93915	0.940738
31.9036	39.9161	44.5049	50.8531	43.4627	31.4733	35.7318	46.7138	53.7242	54.6865	43.3841	31.8641		1.25001	2.24684	0.775189	1.79771	1.28193		1.87149	3.06617	3.26523	2.93946	0.940918
31.1668	35.846	42.1656	43.5369	40.749	30.8186	35.1031	47.4912	56.5218	55.4929	42.4182	30.4026		1.25002	2.66382	0.77615	1.79841	1.28216		2.11223	3.65197	3.26529	2.93948	0.940999
31.2909	38.3377	47.1353	40.4513	43.3	31.3811	36.0873	45.7989	51.1316	54.5534	44.8737	31.1185		1.25013	3.34312	0.777222	1.79845	1.28231		1.56119	2.41845	3.26562	2.93949	0.94107
28.2817	36.5953	42.5246	35.3371	40.3953	31.0388	35.003	46.6098	54.5989	55.5162	45.1163	31.9553		1.25036	2.54353	0.777864	1.80069	1.2824		1.95947	3.30819	3.26569	2.93952	0.9413
28.7648	40.111	47.7286	49.8076	40.8537	31.4731	34.4964	48.4199	59.7872	53.3746	45.1412	32.4182		1.25055	3.09976	0.779327	1.80075	1.28271		2.39554	4.35129	3.2658	2.9396	0.941448
30.1043	33.513	37.2782	51.3617	43.9793	32.1106	36.1438	47.3389	54.5427	56.2933	46.5578	32.3152		1.25069	1.87778	0.77998	1.80117	1.28312		1.80816	2.97167	3.26603	2.93967	0.941478
30.7379	37.1063	43.6097	44.5711	42.7526	30.3766	38.3176	53.7781	66.3967	54.2627	44.143	30.5624		1.25076	2.73891	0.78152	1.80138	1.28312		2.45803	4.46424	3.26654	2.93975	0.941743
27.1986	40.1129	44.8039	51.8151	35.329	30.7025	36.243	48.6894	57.5413	55.6022	44.7453	31.0046		1.25112	2.0091	0.78179	1.80249	1.28344		2.05372	3.51431	3.26654	2.93987	0.941758
29.4864	40.8731	47.3956	48.4771	38.8321	31.3137	37.38	52.1187	63.9266	53.2722	43.1532	32.5606		1.25125	2.73841	0.782315	1.80298	1.28349		2.34769	4.22856	3.26662	2.93995	0.941785
28.252	38.1418	42.5507	44.7491	32.1836	32.2639	35.6895	47.9486	56.669	57.1807	47.0363	31.8612		1.25234	1.97818	0.783624	1.80306	1.28361		2.04933	3.50711	3.26672	2.93996	0.942349
30.363	41.5252	46.7744	47.0832	38.8581	32.1247	34.8167	44.0919	49.1207	57.8807	43.7926	32.0121		1.25251	2.40755	0.783939	1.80427	1.28362		1.58578	2.44555	3.26679	2.94008	0.942388
30.8895	45.2074	51.7113	37.571	42.2633	31.1145	35.1571	49.4693	61.234	54.2482	45.4514	31.413		1.25257	2.55098	0.784227	1.80531	1.28374		2.40387	4.37986	3.26736	2.94018	0.942811
30.0927	35.3054	39.1358	41.0831	40.3779	31.446	35.6848	46.7161	53.8003	56.8251	44.2937	32.0603		1.25266	1.96112	0.784266	1.80534	1.28382		1.80688	2.96723	3.26749	2.94041	0.943259
29.3758	37.2067	42.1468	42.947	38.7013	29.9358	36.2244	50.9935	63.1484	57.8744	44.4143	32.8066		1.25285	2.19391	0.784984	1.80694	1.28384		2.45299	4.47179	3.2677	2.94119	0.943541
34.1927	45.1282	55.0948	46.9523	44.0346	31.3341	38.627	51.343	60.0351	54.1759	44.8382	31.5408		1.25289	3.39155	0.786601	1.80746	1.28415		1.90728	3.21101	3.26794	2.94159	0.943604
30.1947	40.8153	46.6819	50.2158	38.1307	31.4876	37.9936	48.9416	55.4601	54.0867	46.8973	32.1321		1.25294	2.48836	0.787508	1.80758	1.28425		1.74461	2.78335	3.26799	2.94165	0.943672
28.0814	39.8527	44.746	36.9514	45.0086	31.361	36.2142	47.1129	53.9182	52.9937	45.4082	31.282		1.25316	2.18485	0.788744	1.8092	1.28437		1.80518	2.93235	3.26819	2.94176	0.944096
27.5155	35.5767	41.3273	44.6722	43.3426	30.3301	39.4429	53.6137	64.1089	52.0929	46.2426	31.5544		1.25344	2.46419	0.788832	1.80952	1.28441		2.19431	3.81944	3.26824	2.94231	0.944099
30.2806	37.4167	42.5922	40.8573	39.5302	31.8844	35.1813	48.6218	59.1131	53.7963	44.6399	31.7563		1.25373	2.16141	0.790414	1.80965	1.28459		2.25902	4.02235	3.26849	2.94242	0.944104
29.5064	37.8159	42.3118	46.6578	33.8171	32.1581	34.3946	45.2792	52.4375	56.1557	45.4777	31.9148		1.2538	1.9362	0.790823	1.8098	1.28482		1.86755	3.09574	3.26887	2.94255	0.944231
28.6018	36.1012	40.5172	41.3904	42.3843	30.3231	34.5895	45.1084	51.7494	56.1126	44.1559	32.4691		1.2538	2.1735	0.792365	1.81015	1.28509		1.78094	2.90532	3.26925	2.94259	0.944465
29.4098	35.1472	40.9085	43.7741	39.4216	30.7819	34.233	45.1617	52.412	53.3977	44.2395	32.9013		1.25393	2.49961	0.792883	1.8115	1.2851		1.80885	3.00886	3.26932	2.94297	0.944524
31.9067	39.4112	48.6523	34.9523	44.2473	30.7377	37.3786	52.2482	64.247	54.2265	42.6968	32.0357		1.25394	3.52623	0.794119	1.81373	1.28547		2.43228	4.39499	3.26938	2.94335	0.944717
27.5198	39.0778	46.8487	46.9139	40.5623	31.8574	35.7709	45.8273	51.6479	54.0261	47.2024	31.5641		1.25408	2.90875	0.794917	1.81462	1.28566		1.63566	2.58237	3.26938	2.94377	0.944766
27.9879	38.9066	48.3139	42.0019	43.1781	31.8252	37.3202	47.2693	52.6683	54.6697	43.527	31.2029		1.2541	3.58599	0.795881	1.81545	1.28644		1.58369	2.4431	3.26945	2.94418	0.944784
29.4215	37.4975	45.3105	48.4772	37.772	30.8844	36.4539	48.2192	56.1089	58.3274	44.772	31.5192		1.2542	2.96958	0.796479	1.81556	1.28661		1.92232	3.21139	3.26954	2.9442	0.944869
30.9717	42.8489	47.8386	50.6081	38.3896	31.6836	37.2132	48.6344	55.9145	53.7466	43.6759	31.1102		1.25433	2.14999	0.796987	1.81791	1.28665		1.74961	2.86484	3.27035	2.94422	0.944992
30.4023	36.2143	41.9221	55.3079	27.3825	30.3977	34.6086	45.0271	51.5345	58.789	44.3243	31.3937		1.25443	2.56172	0.799081	1.82007	1.28726		1.75237	2.8469	3.27053	2.94449	0.945327
27.8699	38.4218	45.1581	52.1785	43.9809	31.2966	35.2238	45.387	51.4473	58.2511	45.5832	30.6415		1.25451	2.67719	0.800734	1.8201	1.28728		1.66117	2.6517	3.27059	2.94498	0.945389
28.292	40.8932	50.0016	40.2085	39.3688	30.4419	36.4725	48.4629	56.6483	54.0369	43.8349	32.683		1.25479	3.26453	0.801581	1.82075	1.28761		1.93497	3.2559	3.2709	2.94501	0.945526
29.0048	38.5935	46.4523	47.3193	34.3036	32.6437	36.1301	49.5424	59.7611	54.2484	43.1148	30.5265		1.25492	3.08695	0.80213	1.82116	1.28763		2.20576	3.88633	3.27129	2.94511	0.945673
30.1102	43.5996	52.101	48.7334	43.3589	31.7052	36.8076	47.0016	52.7986	53.047	44.7373	29.7806		1.25504	3.45833	0.802242	1.82561	1.28765		1.6233	2.54641	3.2717	2.94552	0.945797
27.2417	43.1718	52.9566	45.2039	42.7643	32.088	35.7257	49.5485	60.4526	60.0586	46.1696	30.5262		1.25513	3.52983	0.803098	1.82758	1.28766		2.3055	4.12418	3.27186	2.94556	0.945968
30.0698	39.9669	48.5306	51.3193	41.1798	30.8999	36.2298	48.2153	56.4465	52.9924	47.797	31.5007		1.25516	3.35258	0.803163	1.82826	1.28784		2.00832	3.38757	3.27197	2.94569	0.946074
27.9306	37.3455	43.6765	50.1074	46.2113	30.9239	35.657	47.0245	54.5553	54.4732	45.0185	31.1054		1.2552	2.44211	0.803936	1.82852	1.28787		1.91963	3.19137	3.27199	2.9457	0.946179
28.3342	39.9202	45.4185	43.1014	39.4051	30.9837	34.7206	48.4441	59.4607	53.5099	43.6792	30.204		1.25529	2.36939	0.806755	1.82917	1.28788		2.29966	4.1457	3.2721	2.94583	0.946476
28.8926	32.3322	35.6992	48.3661	40.1604	33.1987	35.8258	50.6715	63.0471	56.4962	45.6916	31.8373		1.25538	1.661	0.808524	1.83041	1.2879		2.52076	4.62211	3.27278	2.94656	0.946608
31.3135	37.7979	45.1306	50.0627	46.9164	30.5519	36.3229	50.3832	61.4788	57.6387	44.3141	33.0742		1.25549	2.88649	0.808603	1.83085	1.28834		2.30456	4.12318	3.27325	2.9467	0.946692
28.8784	38.6469	47.9175	54.2293	43.0665	33.2792	34.2963	46.8592	56.3219	55.6457	43.8406	31.0039		1.25553	3.54334	0.809343	1.83092	1.28843		2.09398	3.67122	3.27326	2.94677	0.946932
28.3739	41.8052	49.2062	50.1562	44.9397	31.2334	38.4485	51.3258	60.2736	55.4177	43.1213	31.6391		1.25554	2.64365	0.810267	1.83094	1.28851		1.91465	3.24504	3.27348	2.94695	0.946988
31.555	43.5827	48.7573	41.9534	46.9673	31.1748	32.2435	45.2847	55.9492	53.1466	45.906	31.3836		1.25564	2.22851	0.810923	1.83107	1.2886		2.27503	4.13547	3.27385	2.947	0.947258
30.8034	43.5029	51.9582	49.1622	41.2307	30.2596	36.6511	48.8048	57.1705	52.0315	42.496	31.203		1.25571	3.04483	0.81112	1.83186	1.28873		2.01548	3.40279	3.27401	2.94712	0.947391
35.916	40.4663	44.7775	49.8659	41.4346	32.068	33.6997	44.3908	51.4391	57.0928	47.0154	31.9577		1.25578	2.02477	0.813181	1.83257	1.28909		1.86865	3.1006	3.27515	2.94741	0.947451
32.1694	36.5082	40.5143	50.0194	43.1362	31.4433	35.71	48.6729	58.3605	54.4882	43.3854	31.6989		1.25597	1.8354	0.813486	1.83287	1.28939		2.10904	3.68519	3.27516	2.9481	0.947456
29.2661	40.7339	49.4798	48.501	38.987	30.8407	34.6696	48.4986	59.6821	55.1437	44.8164	31.7032		1.25598	3.28682	0.814738	1.83297	1.28954		2.3219	4.19961	3.2753	2.94822	0.947772
32.3768	33.7824	40.3029	51.5439	42.5072	31.4813	37.3776	49.9757	58.7816	57.4266	44.8838	30.6774		1.25603	2.66502	0.81531	1.83359	1.28961		1.99085	3.38241	3.27544	2.94858	0.9478
29.0927	37.3688	43.2936	47.685	35.9838	31.0509	40.6112	56.1428	68.2775	53.8455	44.5265	30.1871		1.25615	2.56759	0.815547	1.83389	1.29		2.29042	4.07989	3.27548	2.9486	0.948182
29.2108	40.6511	46.128	46.5904	44.3702	30.6873	38.305	48.7067	54.4823	55.7666	46.84	32.3814		1.25665	2.07941	0.815946	1.83532	1.29003		1.62189	2.52246	3.27574	2.94862	0.948228
28.8834	40.0231	44.9717	44.1096	38.3819	31.0225	35.9486	46.8843	53.7908	56.9769	44.3894	31.3561		1.25669	2.12603	0.818626	1.83538	1.29013		1.70689	2.78488	3.27621	2.94867	0.948283
30.5368	32.5423	35.9508	43.0554	44.4927	32.5036	36.1639	50.448	61.908	54.6044	43.4547	31.7178		1.25673	1.75509	0.819465	1.83673	1.29055		2.33104	4.20121	3.27642	2.94871	0.948303
32.1415	36.7536	40.7492	41.4502	37.6104	30.8661	35.9026	45.3155	50.3154	55.9036	46.2045	31.8357		1.25674	1.96521	0.820028	1.83815	1.29066		1.56301	2.39326	3.27724	2.94916	0.948493
25.6586	36.7267	43.209	45.4412	35.8074	31.225	34.2811	45.2547	52.5541	58.9284	45.5472	30.3065		1.25674	2.62175	0.820236	1.83881	1.29084		1.86642	3.10792	3.27752	2.95036	0.94853
28.6598	38.9796	48.4864	48.1939	32.8696	30.5825	33.0054	45.2	54.4536	56.5602	45.757	30.1128		1.25682	3.36694	0.822572	1.839	1.29095		2.11352	3.71732	3.27753	2.9505	0.948534
30.1922	38.7134	46.4474	47.9294	26.7487	32.0684	35.3605	45.2692	50.9826	52.5978	48.3553	29.4073		1.25683	3.05627	0.822956	1.83973	1.29101		1.69482	2.67205	3.27764	2.95053	0.948654
28.9116	46.353	54.0762	46.8642	42.2739	30.0064	33.2821	42.1604	46.9823	58.4902	43.9558	31.8982		1.25684	2.8138	0.824598	1.8398	1.29124		1.5679	2.41942	3.27793	2.95058	0.948803
32.8289	41.96	51.5028	48.2121	42.4305	32.2784	37.5552	51.1409	61.2634	58.354	43.1795	31.303		1.25693	3.52746	0.825467	1.8401	1.29135		2.076	3.62279	3.27836	2.95079	0.949099
30.667	40.3043	49.043	51.9784	42.4602	32.0112	36.8956	46.8467	52.3261	57.0045	44.9071	31.7573		1.257	3.2969	0.826416	1.84076	1.2914		1.61786	2.5087	3.27852	2.95083	0.949107
27.1324	39.9408	49.1632	35.3208	41.858	30.7431	34.9792	44.1382	48.9951	57.7448	45.3081	31.5624		1.25701	3.50032	0.827292	1.84163	1.29141		1.55813	2.3844	3.27862	2.95124	0.949241
34.1211	39.6415	45.8601	54.5885	41.9103	31.675	34.2086	47.3326	57.6129	56.2439	46.8671	31.624		1.25742	2.60761	0.831231	1.84211	1.29152		2.27918	4.06451	3.27866	2.95158	0.949479
28.9522	42.8856	52.6802	47.5427	42.8213	31.7811	36.2042	50.4522	61.8494	56.3614	43.5716	30.8387		1.2575	3.48863	0.83199	1.84295	1.29169		2.32127	4.17809	3.27917	2.95182	0.949681
29.6573	42.122	51.4525	51.5451	38.5552	30.8539	35.2531	48.4211	58.5069	55.3143	44.082	30.7662		1.25753	3.26022	0.833008	1.84384	1.292		2.21615	3.91355	3.27928	2.95195	0.94976
31.2817	38.1493	43.0042	47.6445	44.958	31.5737	36.4646	48.3619	56.4248	54.3307	44.46	31.3766		1.25769	2.16114	0.835002	1.84393	1.29201		1.85788	3.11698	3.27953	2.95233	0.950124
29.585	36.7583	43.5103	36.1393	41.0216	31.2262	34.2478	45.1743	52.4185	56.858	44.4745	31.2211		1.2578	2.7509	0.836769	1.84414	1.29217		1.84272	3.06443	3.27959	2.95246	0.950631
30.4787	38.6746	43.8257	42.8387	41.9657	30.6038	38.8374	51.6901	60.52	56.5842	45.148	31.0909		1.25791	2.0853	0.838312	1.8448	1.29259		2.00911	3.38938	3.28005	2.95248	0.950702
28.9166	34.0986	38.5256	44.5213	37.3096	31.2163	36.9448	47.1211	52.8702	58.7102	43.6845	32.0085		1.25799	2.06159	0.838398	1.84709	1.29271		1.6774	2.62506	3.28021	2.95267	0.951294
30.9138	37.1542	41.3918	51.9901	41.7651	32.0975	37.9339	52.8004	64.6519	62.431	45.3822	32.1974		1.25809	1.9698	0.838788	1.84779	1.29286		2.3507	4.22467	3.28071	2.95319	0.951627
28.0904	40.7213	48.5897	48.7119	37.6778	31.7472	35.7961	45.6958	51.3157	55.1652	46.4503	31.8633		1.25831	2.85548	0.839982	1.84851	1.29301		1.66376	2.60826	3.28091	2.95333	0.95181
24.2086	36.8197	42.2594	50.5726	43.3604	31.6696	34.7509	47.6596	57.5003	54.5249	43.7643	32.7455		1.25831	2.43639	0.840126	1.84916	1.29304		2.21257	3.89926	3.2815	2.95342	0.951946
28.6648	39.5901	44.1137	47.1709	37.1187	31.7848	38.2804	50.6921	59.0524	55.8393	43.3862	31.5661		1.25834	2.08518	0.840263	1.84934	1.29339		1.93385	3.23646	3.28196	2.95346	0.952058
28.6651	39.4531	45.4895	55.0199	39.8919	31.3431	35.1846	45.8066	52.4612	53.4653	44.0276	32.0979		1.25849	2.46232	0.84062	1.85041	1.29359		1.73599	2.82356	3.28227	2.95402	0.952183
34.191	37.7933	46.3872	51.6048	41.274	31.8213	34.512	45.5401	52.8631	55.9582	43.9899	30.1326		1.25877	3.14861	0.841391	1.8507	1.29364		1.87841	3.12574	3.2823	2.95427	0.952301
27.7012	38.3469	43.1821	49.381	42.855	31.1504	36.9267	51.3166	62.7349	55.32	44.3099	31.4671		1.25877	2.2514	0.842263	1.8508	1.2938		2.31347	4.14919	3.28245	2.9544	0.952441
28.8841	42.2169	49.6497	48.3486	36.3862	30.1629	34.5351	47.341	57.0884	56.834	43.6782	31.8911		1.25886	2.75244	0.844208	1.85119	1.29399		2.22039	3.91047	3.28263	2.95476	0.952867
27.7722	38.19	44.4581	21.39	42.1174	32.8161	35.6231	49.0944	59.5207	59.7688	43.1252	31.5497		1.25894	2.76592	0.845351	1.85194	1.29408		2.19484	3.89354	3.2827	2.95499	0.95301
33.3059	40.4837	45.3796	51.4169	39.2965	31.699	37.2586	47.5257	53.3291	55.1896	44.6795	32.7699		1.25907	2.19508	0.845751	1.85295	1.29422		1.62005	2.53578	3.28321	2.95523	0.953117
32.627	44.1286	50.2673	51.0734	44.6174	32.0841	35.2616	49.6135	61.4089	55.2915	43.9073	31.0672		1.25916	2.46638	0.847132	1.85308	1.29434		2.4085	4.38798	3.28322	2.95538	0.953261
30.6762	37.3838	43.1032	46.4629	43.6525	31.4735	37.8461	49.5355	57.0356	54.0924	42.3147	30.5571		1.25916	2.45158	0.847423	1.85633	1.29467		1.75136	2.87507	3.2836	2.95553	0.953266
27.1622	36.9499	42.844	53.4604	44.8459	31.5213	37.6219	49.9251	58.2816	54.3243	43.2753	30.0847		1.25921	2.47164	0.847909	1.85652	1.29476		1.92504	3.23255	3.28383	2.95558	0.953474
28.6009	40.526	46.7065	46.1883	40.6676	31.8726	33.565	45.3898	53.9963	58.0011	44.0021	31.1169		1.25929	2.58086	0.847958	1.85679	1.29493		2.07664	3.5881	3.28469	2.95596	0.953907
32.073	36.8615	40.8242	46.2786	40.2537	31.4573	35.8	46.0326	52.0693	54.8795	44.9434	31.4923		1.25936	1.89582	0.852457	1.85768	1.29504		1.67475	2.66277	3.28485	2.95654	0.953936
27.7569	39.3123	47.1664	50.1095	42.8976	32.0362	32.9971	43.271	49.9174	59.7041	44.1459	32.2113		1.25939	3.05746	0.854289	1.85783	1.29512		1.78733	2.9436	3.28506	2.95654	0.954167
29.1852	43.131	48.7161	48.9198	43.8338	33.6525	36.0375	45.7062	50.9954	55.3314	44.8814	30.9102		1.25955	2.32897	0.855784	1.85952	1.29561		1.61319	2.49566	3.28513	2.95688	0.954746
30.0724	41.3348	49.9791	47.5849	44.3462	30.9668	35.6385	47.3135	55.2567	55.7914	45.1849	31.8261		1.2596	3.1921	0.856606	1.86019	1.29564		2.01012	3.37773	3.28569	2.95707	0.954805
30.6931	35.447	40.9583	49.7572	43.9434	31.3243	35.3127	47.9541	57.2869	54.1869	42.6871	30.9484		1.25993	2.32862	0.859754	1.86034	1.29571		2.0766	3.60969	3.28574	2.95709	0.954931
28.1496	37.5541	41.8135	49.9571	40.606	32.5444	35.7905	50.1973	61.9336	58.1254	42.8306	31.4634		1.25995	2.05709	0.861614	1.86195	1.29613		2.39225	4.34108	3.28575	2.95715	0.954951
28.6902	39.1593	47.925	44.7652	42.5452	31.4433	35.9483	50.2543	61.802	51.0048	44.9218	32.0289		1.25996	3.31562	0.864275	1.86311	1.2962		2.31803	4.18913	3.28586	2.95738	0.955051
31.0336	40.6474	50.5254	39.2631	39.9046	31.3032	37.778	49.154	56.2617	54.6896	43.7537	31.2109		1.26003	3.4874	0.865095	1.86412	1.29661		1.79025	2.90881	3.28598	2.95748	0.955178
28.0821	43.9869	53.6416	46.1808	42.6595	31.6944	36.0341	48.533	57.5035	54.7183	45.5751	32.2571		1.26009	3.57073	0.865763	1.86417	1.29678		2.07692	3.56753	3.28632	2.95751	0.955337
28.1868	36.9451	45.5941	50.1403	36.9327	32.0882	38.5635	49.7971	56.5674	49.6145	45.2177	31.0566		1.26011	3.42683	0.866394	1.86424	1.29684		1.76353	2.82637	3.2866	2.95787	0.955649
30.3939	43.5704	51.9196	35.3351	40.7534	30.2445	37.358	52.2717	64.3403	54.7545	44.1002	31.5927		1.26024	2.90368	0.867382	1.86436	1.29757		2.38364	4.31256	3.28698	2.95829	0.955746
31.3477	40.7022	48.1092	49.0665	45.8533	30.9671	36.6287	46.111	51.0647	53.4221	43.1482	30.5508		1.26032	2.79066	0.8707	1.86461	1.29776		1.53742	2.3406	3.28742	2.95835	0.955779
28.4308	40.1892	44.7819	49.1766	42.6523	31.3375	38.8038	50.7233	58.3277	58.9558	44.5837	32.6035		1.26038	2.19724	0.871002	1.86461	1.29778		1.85145	3.03264	3.28751	2.95845	0.956432
28.0806	37.5426	41.9543	44.8827	44.7157	32.1028	38.0827	52.6373	64.0021	53.6261	46.7841	30.9729		1.26039	1.98829	0.872391	1.86712	1.29797		2.28868	4.07577	3.28809	2.9585	0.956538
32.6162	36.1787	43.9848	48.5707	42.8163	31.1079	36.1113	50.2245	61.45	51.1662	43.9834	31.487		1.26047	3.09061	0.873962	1.86829	1.29798		2.32932	4.18205	3.28822	2.95852	0.956641
31.0256	42.5368	51.5233	49.5433	40.9643	31.8194	34.9349	44.0501	48.8618	50.9445	45.9242	31.4774		1.26067	3.09491	0.874272	1.86846	1.2981		1.47717	2.25692	3.2889	2.95857	0.95685
29.3196	41.7982	49.8866	40.9391	41.7972	31.2297	35.2576	48.1333	57.8058	55.3754	43.508	32.3521		1.26078	3.13305	0.874949	1.86854	1.29816		2.13939	3.74657	3.28934	2.95857	0.956965
27.8338	41.3689	49.9798	44.8654	34.2024	31.3837	36.8523	46.2816	51.1312	54.2877	42.4492	31.8341		1.26082	3.38573	0.875057	1.87085	1.2983		1.54851	2.34493	3.28967	2.959	0.956978
27.4761	36.5233	42.504	46.9083	40.691	31.1146	36.62	48.2775	55.9893	53.8289	44.8382	30.7699		1.26093	2.54564	0.876034	1.87112	1.29841		1.83883	3.05529	3.2901	2.9593	0.957072
29.4923	39.4467	46.0796	46.092	42.5094	31.306	35.9239	47.1642	54.4724	53.9795	43.7755	32.0276		1.26097	2.52413	0.876253	1.87282	1.29849		1.83616	3.02998	3.29034	2.95944	0.957173
29.8692	37.9904	42.0356	44.403	40.6837	30.9063	34.4984	46.3898	54.8758	56.2867	41.6226	31.6844		1.2612	2.03476	0.876569	1.87315	1.29851		2.0701	3.54736	3.29067	2.95969	0.957449
30.0501	34.5999	39.2122	50.3206	41.8529	31.9761	34.9965	44.4089	49.5734	52.1546	42.2293	31.8718		1.2612	2.11336	0.877454	1.87411	1.29857		1.59713	2.47347	3.29124	2.95976	0.957621
29.9382	37.2049	41.6415	52.6946	36.5708	30.5923	36.476	51.5618	64.1183	50.8871	42.0849	31.8593		1.26123	1.9781	0.879073	1.87432	1.29865		2.40514	4.40704	3.29229	2.96011	0.957685
29.452	42.8408	50.5101	50.5177	41.6526	31.029	33.7888	45.7869	54.5814	56.4349	44.4971	31.9582		1.26144	3.01683	0.879509	1.87454	1.29878		2.05937	3.56887	3.29238	2.96027	0.957709
29.6207	33.0407	36.6179	47.3013	32.7969	31.5389	33.8859	45.1375	52.892	54.7669	44.7854	31.4389		1.26157	1.83407	0.879725	1.8766	1.29886		1.95116	3.29588	3.29258	2.96036	0.957711
27.3754	41.8327	51.9253	39.2788	42.7153	31.2162	36.633	47.6122	54.4375	51.3825	44.4248	32.5692		1.26166	3.51999	0.87976	1.8766	1.29892		1.77924	2.88532	3.29325	2.96045	0.958034
26.4224	34.697	40.3731	48.7182	41.4124	32.2215	37.0956	49.9032	59.0566	55.1524	44.398	31.267		1.26178	2.31856	0.880022	1.87712	1.29907		2.04985	3.51485	3.29375	2.96056	0.958303
31.1392	35.9162	40.7746	43.8467	40.7086	31.647	35.9379	45.4396	50.5416	53.5525	46.4457	32.8894		1.26181	2.09772	0.882558	1.88291	1.29921		1.58827	2.44112	3.29402	2.96068	0.958324
29.3087	39.8486	45.1134	41.5116	42.8975	31.932	36.7097	51.1425	62.6783	56.719	44.0004	30.9414		1.26188	2.14281	0.883975	1.8841	1.29934		2.34023	4.21072	3.29404	2.96069	0.958381
33.2001	38.8303	44.1025	42.6583	41.9306	31.1801	36.7902	48.091	55.3006	53.1517	45.9473	31.8046		1.26216	2.3329	0.884086	1.88792	1.30008		1.83689	3.00878	3.29438	2.96101	0.958559
31.1814	39.4776	47.64	50.29	38.953	29.7476	37.1078	50.7842	61.1401	50.1589	44.5382	31.8188		1.2622	3.27585	0.884395	1.88844	1.30039		2.1241	3.73249	3.29453	2.9611	0.958606
28.0817	45.0968	53.3945	53.1991	17.3269	30.2705	36.3673	47.8651	55.4193	57.0261	44.0647	32.8747		1.26224	3.11965	0.887546	1.89161	1.30044		1.93797	3.21124	3.29466	2.9613	0.958939
28.7241	38.0999	43.4586	41.0666	36.4987	31.8718	35.5632	46.0167	52.3799	58.2273	44.5055	31.3221		1.26226	2.27709	0.888396	1.8922	1.30046		1.73647	2.79349	3.2949	2.96139	0.959062
25.4338	43.7832	53.4979	45.7959	42.5603	31.6524	37.0487	48.7784	56.4958	54.4521	43.4492	31.2081		1.26229	3.65432	0.889715	1.8925	1.30055		1.90901	3.16502	3.29511	2.9614	0.959111
28.6722	36.9829	42.29	46.1964	42.0701	31.2228	37.5067	48.3764	54.8898	56.2704	43.511	31.078		1.2625	2.31126	0.892286	1.89254	1.30065		1.68918	2.70139	3.29532	2.96141	0.95926
30.7944	35.1195	39.0737	48.7227	41.6554	32.0432	37.4182	48.7203	55.8049	55.3984	44.9182	31.6214		1.26255	1.95701	0.89243	1.89268	1.30088		1.75211	2.85039	3.29544	2.96182	0.959289
27.7902	34.7619	40.2716	43.3357	43.325	31.0407	36.8101	46.5644	51.8173	52.3654	44.1229	31.3559		1.26255	2.37319	0.894363	1.89458	1.30112		1.53211	2.35719	3.29551	2.96182	0.959368
28.0811	41.2009	50.5723	50.2328	40.7489	32.7421	35.3151	47.377	55.9125	53.639	46.4059	32.2019		1.26279	3.482	0.895292	1.89602	1.30123		2.03285	3.47138	3.2959	2.96184	0.959951
28.5153	42.2364	52.0769	48.3987	38.8346	31.8158	35.7712	48.0821	56.8549	58.9773	44.9571	32.0935		1.26292	3.59784	0.896251	1.89888	1.30139		1.95052	3.34046	3.29608	2.96201	0.960374
27.1228	41.4199	49.1834	48.8657	42.2892	31.0034	35.8177	47.6729	55.8186	54.3002	46.224	30.8982		1.26293	3.06248	0.897024	1.89947	1.30164		1.95256	3.29417	3.29682	2.96206	0.960463
30.8707	39.9473	47.8216	48.1153	42.116	31.6873	36.0991	46.392	52.4475	54.7596	41.5794	32.8834		1.26296	3.08263	0.897709	1.90033	1.30178		1.68535	2.67687	3.29697	2.96221	0.96073
28.5126	41.4889	47.5723	51.3761	42.6754	31.7878	38.7693	53.0956	63.968	53.4765	44.0802	32.72		1.26322	2.54553	0.899249	1.90043	1.30194		2.14737	3.77705	3.29703	2.9623	0.960782
30.5084	44.503	49.7862	47.4059	40.3129	31.8707	35.0929	44.9277	50.5992	51.9261	45.479	32.2651		1.26329	2.15464	0.90049	1.90044	1.30199		1.69972	2.6799	3.29718	2.96238	0.960792
34.9782	39.6119	45.4688	50.4679	37.9009	30.7039	35.6145	48.5746	58.2809	55.5094	43.6856	31.7154		1.26334	2.34268	0.900864	1.90271	1.30226		2.14484	3.75119	3.29747	2.96239	0.961138
27.7522	37.8904	42.5736	47.3024	45.2231	30.6687	34.4141	44.7464	51.1817	52.1438	45.4476	33.3516		1.26336	2.07613	0.903103	1.90303	1.30229		1.71968	2.79074	3.29783	2.96249	0.961141
29.4125	39.3168	44.572	47.8415	35.5036	33.6117	35.9895	49.6965	60.3683	51.8313	45.5211	31.27		1.26371	2.31912	0.904792	1.90388	1.30268		2.29099	4.07468	3.29791	2.96253	0.961159
30.7742	42.3181	52.2755	56.2745	39.4317	32.6951	34.058	44.2754	50.6337	51.5782	47.3522	30.7759		1.26372	3.60282	0.905033	1.90482	1.30277		1.77416	2.87823	3.29823	2.96254	0.961174
29.0161	40.8612	48.6078	48.963	37.489	30.7647	36.4057	47.3421	54.1578	56.7272	44.1771	32.0225		1.26373	2.74052	0.905945	1.90525	1.30307		1.80506	2.92997	3.29892	2.96255	0.961232
27.8368	35.5092	42.3533	45.8443	40.631	30.917	36.8112	51.5436	63.4898	52.5264	44.0023	31.307		1.26377	2.61627	0.906543	1.9071	1.3034		2.36979	4.2914	3.30002	2.96266	0.961374
31.1853	41.3819	50.865	51.0267	39.3968	30.7626	34.4653	43.4953	48.2877	55.8512	42.3578	32.4575		1.2638	3.3158	0.906868	1.90768	1.30344		1.51849	2.3244	3.30061	2.96277	0.961448
26.7817	40.9352	47.4313	51.3057	37.292	31.4572	34.8603	44.4047	49.7579	51.2904	47.9969	32.6127		1.26399	2.57471	0.910027	1.90772	1.30484		1.56759	2.44679	3.30062	2.96324	0.961558
28.6265	36.8882	43.8317	42.0215	35.6636	31.7872	38.3925	48.731	54.4125	54.5595	45.9692	31.094		1.26413	2.60078	0.911572	1.9088	1.30486		1.63798	2.53813	3.3008	2.96331	0.961642
28.1839	43.2839	52.303	50.1276	41.9363	31.2022	35.1276	45.0931	50.9222	55.6555	43.9125	31.1122		1.26422	3.28202	0.912675	1.91103	1.30488		1.64784	2.6117	3.30116	2.96331	0.961746
25.4798	41.4047	50.6646	47.7806	40.0786	33.0592	35.4376	49.9386	61.9074	58.1628	45.418	32.1605		1.26423	3.367	0.914048	1.9112	1.30494		2.40639	4.39258	3.30124	2.96341	0.961795
31.2446	39.7026	48.6282	48.9377	41.8605	30.4984	37.4586	47.0232	51.9288	53.8802	43.2102	31.9284		1.26429	3.45463	0.914275	1.91307	1.30502		1.50653	2.2792	3.30263	2.9636	0.961924
25.2101	42.4416	51.8176	50.6034	43.9152	31.4131	34.3246	47.8894	58.777	55.9533	46.2173	31.4158		1.26459	3.41666	0.917462	1.9132	1.30503		2.32592	4.19279	3.30332	2.96363	0.961969
32.7801	36.3864	44.8653	46.0051	39.4149	33.2529	34.171	44.684	51.402	57.0138	45.4555	31.8213		1.26475	3.26457	0.918052	1.9138	1.30518		1.77913	2.91604	3.30372	2.96368	0.96197
29.3485	43.8747	51.3524	50.2644	42.0692	31.755	35.5267	48.0049	57.0625	53.0092	44.1827	30.6752		1.26477	2.82594	0.918171	1.91511	1.30531		2.08954	3.60628	3.30373	2.96398	0.961971
27.7162	38.325	46.9344	36.2792	47.1611	32.1156	32.3735	41.5667	46.95	55.3927	42.0886	30.4056		1.26484	3.33472	0.918601	1.91573	1.30532		1.6489	2.61445	3.30417	2.96414	0.961975
31.9434	36.7099	44.287	52.5017	47.2533	32.1665	35.9215	50.4351	62.2938	56.2622	46.3474	31.153		1.26497	3.0109	0.91892	1.91793	1.30533		2.38983	4.34251	3.30433	2.96416	0.962036
29.5667	37.0637	42.9427	39.0204	41.987	31.6821	36.4055	46.5223	52.2985	53.4754	46.7757	31.3607		1.26508	2.50057	0.91933	1.92095	1.30559		1.65452	2.59917	3.3046	2.9642	0.962077
32.8751	40.3777	46.2157	43.1418	43.8195	31.154	34.9283	45.867	52.9855	53.0383	44.1262	31.4811		1.26514	2.47523	0.919533	1.92176	1.30563		1.83613	3.03102	3.30468	2.96428	0.962124
28.4066	46.1486	56.7715	44.9554	39.7444	31.1394	36.2038	50.5886	62.1848	57.137	45.3612	31.1174		1.26527	4.0501	0.919586	1.92304	1.30579		2.32041	4.19101	3.30512	2.96446	0.962132
26.3822	36.9147	41.3176	49.2579	42.9904	33.349	38.8863	53.8113	65.5065	57.0189	44.3168	30.4174		1.2653	2.00386	0.919921	1.92368	1.30596		2.27117	4.05085	3.30522	2.96449	0.962167
31.1011	38.6904	43.3089	44.9381	43.1641	30.8364	35.0576	44.2176	49.0617	54.58	45.5706	32.1737		1.2654	2.0775	0.922295	1.92491	1.30607		1.53524	2.34712	3.30537	2.96459	0.962217
30.4902	40.7506	50.5435	47.745	40.2009	30.5453	33.2436	43.4259	49.9027	55.8085	44.9547	32.0244		1.26541	3.68267	0.924027	1.92517	1.3064		1.73101	2.83206	3.30577	2.9648	0.962228
31.059	36.0837	43.212	50.215	30.0702	30.0561	35.633	47.0174	54.5757	54.9462	45.1921	31.8674		1.26553	2.80674	0.933239	1.92564	1.30669		1.89435	3.15204	3.30599	2.96487	0.96224
28.9386	39.3836	47.8236	49.4367	44.8052	30.7546	36.9964	51.9666	64.2131	51.2941	44.2832	31.7123		1.26555	2.98056	0.935979	1.92752	1.30683		2.36865	4.30633	3.30726	2.96488	0.962741
31.0148	33.1716	36.8577	42.9205	39.3104	31.7625	34.9235	46.4278	54.2965	55.4628	43.1493	30.6144		1.26555	1.78712	0.936796	1.92791	1.30684		1.95885	3.29867	3.3075	2.96519	0.962758
29.6408	36.0737	42.1221	51.2513	37.2234	30.7281	36.9823	50.8179	61.4291	54.5721	47.6067	31.7589		1.26564	2.33459	0.937757	1.92794	1.30702		2.19518	3.87877	3.30762	2.96545	0.962817
32.3533	41.0154	50.7043	39.5226	42.9556	30.9575	34.9056	46.1195	53.6054	58.3078	44.581	31.5619		1.26567	3.48607	0.938531	1.92889	1.30714		1.86719	3.11363	3.30821	2.966	0.96293
30.9192	36.6193	41.0147	46.3999	35.4808	30.6614	36.1744	47.1117	53.9746	55.7393	45.1532	30.8859		1.26583	1.92092	0.939434	1.93021	1.30717		1.77582	2.89012	3.30881	2.96611	0.963054
31.3457	34.7321	38.5474	53.7024	46.0192	31.8287	36.5669	51.3866	63.5251	52.0989	45.1899	32.0416		1.26586	1.81146	0.939887	1.93081	1.30734		2.42389	4.40925	3.3089	2.9663	0.963218
29.3645	36.9105	43.4242	46.9211	42.8707	31.4543	35.8935	49.5711	60.2246	56.2253	46.6655	31.0394		1.26609	2.7453	0.940619	1.93105	1.30744		2.33319	4.15054	3.30927	2.9667	0.963466
27.3214	38.9954	44.0622	48.1885	40.7529	30.8548	36.3806	47.4509	54.4445	53.0749	45.6892	32.2296		1.26692	2.10173	0.941119	1.93184	1.30752		1.83387	2.9924	3.30947	2.96756	0.963507
29.7639	39.9959	47.7623	48.2847	43.021	31.3635	32.0962	42.4519	49.3941	53.2476	45.794	31.393		1.26705	3.17738	0.94276	1.93284	1.30754		1.82505	3.04851	3.3097	2.9677	0.964262
26.7337	40.6203	45.971	52.6565	37.002	30.1954	36.434	48.4998	56.7946	56.6379	44.8865	32.6394		1.26712	2.22126	0.944173	1.93312	1.30758		1.92827	3.25389	3.30974	2.96789	0.964402
29.8787	38.3133	42.772	46.565	39.0772	31.4742	35.9454	49.3478	59.5974	53.2956	45.7459	31.5036		1.26713	2.10621	0.945604	1.93321	1.30782		2.19375	3.87142	3.31086	2.96795	0.964425
27.0081	39.2761	48.368	55.1226	41.5643	30.6175	37.6756	50.0271	58.4364	54.7415	41.0357	31.8208		1.26738	3.43257	0.946161	1.93377	1.30785		1.95201	3.28101	3.31131	2.96819	0.964699
30.9471	41.3258	49.6416	53.6426	40.9601	31.2278	34.7692	47.757	57.7049	51.0907	45.511	31.6334		1.26738	3.13692	0.94644	1.93431	1.30787		2.20253	3.88956	3.31167	2.96824	0.965073
26.6999	39.9171	47.1431	45.2014	38.524	32.0282	36.3169	47.5479	54.7631	57.5693	44.3052	31.3588		1.26757	2.64814	0.947421	1.93513	1.30839		1.85326	3.04386	3.31188	2.96847	0.965237
27.4404	41.5527	50.4372	50.8459	43.679	29.8445	37.4402	47.0879	52.0972	53.891	46.3967	32.8074		1.26765	3.46625	0.947625	1.93564	1.3087		1.50822	2.29133	3.3119	2.96858	0.965301
31.1556	38.479	42.9244	51.8333	42.9081	31.5027	34.8333	46.6382	54.9317	54.3677	44.7997	31.2015		1.26784	1.97959	0.948227	1.93621	1.30883		2.05407	3.49715	3.31199	2.96859	0.965343
27.7857	42.021	52.1821	45.402	30.529	32.12	34.7763	47.7727	57.7313	54.0757	46.1616	32.378		1.26785	3.63167	0.949165	1.93961	1.30888		2.24763	3.96987	3.31224	2.96873	0.965563
31.8646	41.6533	49.6433	34.3499	44.5003	31.2472	36.8502	47.329	53.4749	54.1605	44.5987	31.6291		1.26793	2.88841	0.949768	1.93967	1.30911		1.65178	2.62055	3.31307	2.96883	0.965599
29.4985	37.2728	43.9356	40.4191	41.8515	32.7304	34.4143	43.9717	49.4245	52.3904	43.8957	31.1254		1.26808	2.69369	0.949955	1.94117	1.30922		1.65598	2.60076	3.31309	2.96898	0.965635
28.6988	39.7256	45.6973	43.2557	41.9814	31.0324	37.0766	51.1012	61.9579	56.1482	45.6428	31.2064		1.26814	2.41921	0.954714	1.94161	1.30928		2.31696	4.11056	3.3134	2.96913	0.965688
28.7699	35.7651	41.4922	48.6659	38.0987	29.305	34.4918	47.9087	58.5392	52.0564	42.638	32.7686		1.26821	2.43846	0.955534	1.94171	1.30935		2.35378	4.21874	3.31357	2.96941	0.965914
26.8082	38.8576	45.8991	50.1412	35.4022	31.6071	35.9387	46.5927	53.1382	52.0938	45.7616	31.2602		1.26824	2.64007	0.955775	1.94208	1.3096		1.81919	2.93686	3.31359	2.96946	0.966171
29.0424	33.8929	38.9453	49.5858	44.3985	31.5926	35.0985	46.3603	53.8689	54.831	46.3179	30.4298		1.26832	2.21617	0.955862	1.94308	1.3099		1.87763	3.1295	3.31372	2.96981	0.966244
33.5738	40.0676	45.8266	34.2142	43.622	31.6856	38.3368	52.0281	62.1146	56.3029	44.4258	31.9914		1.26852	2.39011	0.95734	1.94313	1.31065		2.14465	3.72464	3.31374	2.96982	0.966317
28.9052	39.9479	45.6427	47.1233	39.6458	32.1848	37.5868	52.6302	64.8289	52.3126	43.8106	31.5726		1.26855	2.41888	0.95864	1.94657	1.31075		2.32414	4.20879	3.31402	2.96996	0.966336
31.0823	41.6335	49.2213	50.6511	37.7614	32.2093	37.3712	48.9539	56.412	53.4886	46.1715	32.2149		1.26861	2.90752	0.962064	1.9468	1.31089		1.81573	2.98488	3.31414	2.96998	0.966941
28.2572	36.7869	43.7664	47.4405	42.102	31.3303	37.1576	50.537	60.4652	52.4036	43.8302	30.7924		1.26863	2.86524	0.962497	1.94905	1.31092		2.15958	3.7621	3.31437	2.97039	0.966986
27.6717	37.6729	45.7084	48.4856	40.3767	31.0617	36.3945	46.8297	53.0079	55.3598	43.2984	31.9664		1.26868	3.05555	0.963033	1.94956	1.31116		1.67874	2.67265	3.31446	2.9704	0.967113
29.7183	36.5359	43.7915	42.739	41.7912	32.3986	35.4922	47.8212	56.6816	55.8828	47.7897	30.0867		1.26886	2.95807	0.963214	1.95037	1.3113		2.02165	3.47454	3.31514	2.97044	0.96714
32.7908	41.5466	50.1834	43.8509	39.3162	30.4244	34.6979	47.0472	56.1175	53.487	43.3797	30.4016		1.26891	3.29782	0.963567	1.95052	1.31163		2.06547	3.58252	3.31535	2.97046	0.967317
34.2639	43.1674	51.9728	48.1713	40.6304	31.3037	32.5542	43.1224	50.2496	55.6868	43.1506	32.0668		1.26913	3.29094	0.967033	1.95153	1.31167		1.85697	3.10931	3.3156	2.97048	0.967431
29.0792	34.4159	39.1729	47.0354	38.85	32.5987	35.4401	46.1924	52.9639	52.1763	44.98	33.4292		1.26919	2.20585	0.967735	1.95216	1.31174		1.75144	2.85445	3.31564	2.97084	0.967432
30.4019	37.3755	43.2821	34.0446	39.6018	31.3841	36.849	50.8917	61.8303	57.0036	44.9268	30.0052		1.26946	2.44606	0.968092	1.95221	1.31228		2.26161	4.02332	3.3158	2.97148	0.967528
28.5095	34.0824	39.1468	11.0547	41.7897	30.3151	34.5773	45.4478	52.5495	53.5796	44.8599	30.3529		1.26952	2.15646	0.969208	1.95273	1.31236		1.80383	2.98227	3.31606	2.97158	0.967566
28.5251	37.2175	44.0898	51.6517	40.4962	29.8364	33.9299	43.4419	48.9294	53.7882	44.3128	31.4881		1.26966	2.54353	0.970524	1.95315	1.3127		1.67974	2.64878	3.31611	2.97159	0.967643
28.5062	36.6504	41.9903	41.8134	44.7503	32.2304	36.8366	47.6363	54.1914	56.8248	47.8742	31.0852		1.26972	2.46715	0.971303	1.95366	1.31275		1.75179	2.81508	3.31613	2.97183	0.967717
25.0025	38.9087	46.873	48.2642	43.2756	31.5068	33.3008	41.9339	46.4527	58.0339	44.9549	31.658		1.26973	3.03431	0.972746	1.95439	1.31336		1.48884	2.26812	3.31623	2.9721	0.967738
31.8064	42.2214	51.9116	50.4558	40.6011	31.25	35.3692	46.3552	53.445	55.0307	42.3811	31.5343		1.26981	3.33741	0.973395	1.95469	1.31355		1.81983	2.99424	3.31694	2.9722	0.967971
37.8566	43.1795	53.6194	49.1238	40.8666	31.0786	35.286	44.2996	48.9251	57.0593	46.4693	32.5326		1.26985	3.97478	0.974015	1.95487	1.31383		1.45239	2.19771	3.31702	2.97237	0.967994
32.1264	41.3478	50.3436	50.1645	33.9566	30.3884	36.1955	50.0425	60.8635	55.1864	43.8689	32.0378		1.26989	3.34834	0.975276	1.95494	1.31394		2.22991	3.97253	3.31718	2.97264	0.968001
35.4087	36.665	45.009	39.3997	42.8773	31.4666	35.0492	47.6261	56.9307	53.9371	43.0851	31.391		1.27007	3.32484	0.975538	1.95636	1.31407		2.15361	3.74688	3.3172	2.97273	0.968105
32.4356	41.3859	47.4464	46.2236	43.2978	31.4036	36.5285	48.1473	55.8272	50.2361	44.3516	31.3804		1.27009	2.4102	0.975586	1.95693	1.31409		1.87715	3.11793	3.31733	2.97285	0.968111
27.9618	37.4823	45.3214	50.9963	41.9717	31.9669	34.7822	46.1352	53.8321	54.2754	44.942	32.4348		1.27027	3.00877	0.976142	1.95717	1.31423		1.93485	3.24661	3.31759	2.97289	0.96823
32.0531	36.8917	42.546	39.6204	45.5844	31.0419	38.1659	53.707	66.4845	56.6944	46.3913	31.2662		1.27032	2.43636	0.976669	1.95764	1.3143		2.45952	4.48167	3.31768	2.97297	0.968295
25.7659	38.2	45.347	49.5198	42.9016	31.0915	34.3016	44.2118	50.1299	54.8091	44.7414	32.1625		1.27032	2.89527	0.976851	1.95788	1.3147		1.65242	2.63919	3.31807	2.97319	0.968415
26.9614	41.039	45.6346	52.5846	38.655	32.0556	38.6448	51.9791	61.5038	55.0496	45.8962	32.1881		1.27035	2.0439	0.9771	1.95804	1.3148		1.99798	3.42512	3.31836	2.97326	0.968524
26.87	42.0179	50.7522	48.4179	42.7613	31.3116	32.6639	42.6053	48.887	56.9432	43.3116	31.1117		1.27036	3.16681	0.978878	1.95818	1.31507		1.78869	2.91891	3.31891	2.97328	0.968671
30.4469	38.3632	42.5272	47.2165	43.7961	30.9602	35.9736	46.2121	52.2229	55.3672	45.4302	30.3684		1.2704	1.94162	0.980914	1.9589	1.31518		1.60379	2.54535	3.31907	2.97343	0.968732
27.513	36.0709	40.5307	43.4339	38.1171	31.8173	35.4714	47.4276	55.7851	55.6592	43.7992	29.8333		1.27078	2.06059	0.98237	1.96004	1.31525		2.0269	3.44371	3.31911	2.97369	0.968819
26.4347	40.1892	48.7425	45.0814	42.9739	32.0397	36.1742	48.3268	56.7951	54.3557	43.8592	31.1333		1.27079	3.34578	0.982496	1.96074	1.31553		2.01519	3.41945	3.31976	2.97369	0.968828
31.667	35.3378	39.3153	52.1754	39.4442	32.0688	36.0882	48.8515	58.1735	55.8914	43.0779	30.8575		1.27083	1.79058	0.983287	1.96079	1.31554		2.08429	3.6066	3.32017	2.97387	0.968983
32.6462	41.457	50.892	32.6513	39.8792	31.7192	35.2546	48.8004	59.4246	53.7782	45.9659	31.5737		1.27085	3.36029	0.985002	1.96089	1.31555		2.21316	3.94896	3.32032	2.97399	0.969506
32.9071	37.6457	44.25	51.0995	28.4855	31.007	36.2591	46.692	52.8934	55.4134	44.5516	33.1273		1.27088	2.70033	0.985874	1.96215	1.31568		1.69008	2.69468	3.32055	2.97434	0.969719
31.7811	39.9936	49.5113	51.2442	40.9244	31.1965	37.1846	50.6436	60.6765	54.3043	43.0592	30.8835		1.27092	3.47392	0.986323	1.96278	1.31599		2.13879	3.73312	3.32072	2.97447	0.969806
31.4893	34.1981	37.8157	48.5026	33.1549	32.0642	37.9111	48.743	55.1305	53.0375	44.9743	30.6505		1.27093	1.78444	0.988477	1.96292	1.31605		1.72112	2.73605	3.32073	2.97457	0.970259
30.5841	40.3402	45.9375	51.1577	37.2699	30.5136	35.627	48.4926	58.0639	53.7997	46.708	31.6343		1.27095	2.55542	0.989504	1.96449	1.31625		2.13163	3.71744	3.32095	2.97482	0.970284
28.0008	38.1455	43.6755	44.3102	41.8835	32.5274	35.1919	49.6571	61.6387	51.5248	41.9548	31.156		1.27099	2.45738	0.990335	1.96595	1.31633		2.45479	4.48812	3.32132	2.97488	0.970324
29.4421	40.4828	44.7672	42.0563	42.1945	32.0585	36.284	51.2944	63.7909	55.3969	44.5862	31.7216		1.27111	2.00663	0.990335	1.96626	1.3164		2.39153	4.38254	3.32181	2.975	0.970389
28.6817	39.7986	47.3412	41.1202	45.76	32.6506	36.3546	49.3105	58.8374	55.9775	45.148	31.2581		1.27111	3.04723	0.990852	1.96719	1.3164		2.10624	3.65502	3.32226	2.97529	0.970536
31.3693	46.4025	53.9147	38.0385	42.5039	32.004	34.8134	49.1457	61.0321	57.0522	46.088	32.2329		1.27142	2.84821	0.991183	1.96732	1.31646		2.48177	4.54001	3.3227	2.97546	0.970547
31.4074	36.9048	41.5894	46.4122	42.8836	32.7051	35.3235	49.8483	61.8829	54.7014	44.6044	31.6148		1.27145	2.0439	0.991513	1.96778	1.31647		2.4146	4.41524	3.32287	2.97601	0.970577
34.7871	46.0407	54.304	40.5505	37.4474	30.3688	36.4661	49.7038	59.5968	53.6365	44.6541	31.1758		1.27146	3.09306	0.99216	1.96829	1.31694		2.09611	3.66263	3.32303	2.9764	0.970818
26.5644	42.8574	50.9355	41.8868	40.637	30.6404	34.4158	46.8603	56.1289	53.4582	42.5604	31.3292		1.27163	3.07079	0.99354	1.96965	1.31697		2.06322	3.5999	3.32328	2.97641	0.970837
28.6398	39.696	44.1254	48.7364	39.8726	31.119	34.8669	46.0644	53.5367	56.0282	42.1618	32.8051		1.27163	2.09567	0.993624	1.97017	1.31707		1.88587	3.14435	3.32351	2.97642	0.971587
35.0368	36.5653	42.1797	49.298	38.0091	30.0087	33.386	46.0699	55.9248	56.1504	46.7182	30.2823		1.2717	2.52802	0.994144	1.97018	1.31707		2.3032	4.0927	3.32366	2.97665	0.971675
25.1819	37.8415	44.2674	45.3196	41.9598	31.3821	35.0596	44.0386	48.6625	54.8432	44.6162	30.0255		1.27183	2.56867	0.996233	1.97098	1.31727		1.50452	2.2793	3.32366	2.97669	0.971738
31.0803	43.3684	53.8316	36.6667	42.2769	30.439	36.497	48.3567	56.3625	54.9886	44.8822	32.1459		1.27188	3.75893	0.998446	1.97307	1.31753		1.91337	3.20498	3.32369	2.97705	0.971808
27.2534	40.464	49.4445	47.5863	36.284	30.5548	36.4117	47.1828	53.785	55.0679	46.9505	29.7783		1.27208	3.01394	0.999272	1.97345	1.31756		1.75525	2.83113	3.32401	2.97719	0.972111
33.3098	45.2791	53.6311	45.3944	30.0788	31.3923	34.8054	44.4806	50.0066	55.4486	43.6319	31.7958		1.27227	3.17869	0.999573	1.97441	1.31786		1.64538	2.58516	3.32416	2.97721	0.972321
30.6178	40.2339	45.7833	38.8489	28.444	31.1278	34.1023	47.9935	59.4177	57.4399	43.5149	31.5627		1.27232	2.32223	1.00006	1.97503	1.31787		2.26577	4.12914	3.32425	2.97724	0.972375
28.4586	38.5494	43.8373	57.0999	44.0347	31.4879	37.0485	51.3581	62.6298	55.0753	45.3203	32.5773		1.27233	2.17313	1.00026	1.97551	1.31789		2.29756	4.10737	3.32435	2.97727	0.972389
29.3599	35.872	42.1642	48.1916	22.0171	31.1705	33.7623	44.3405	51.2276	53.4235	45.0177	31.0459		1.27253	2.62266	1.00159	1.97555	1.31789		1.84598	3.04783	3.32454	2.97734	0.972582
30.5438	38.7181	42.8276	45.5183	39.5134	30.8066	34.3128	44.6431	51.096	55.9058	45.1908	31.4941		1.27253	1.87033	1.00249	1.97594	1.31799		1.74183	2.82987	3.32463	2.97756	0.972841
29.3571	37.0711	43.1988	43.1834	35.8388	31.693	34.0462	44.3493	50.8205	54.9654	47.3049	31.9416		1.27266	2.5768	1.00314	1.97602	1.31803		1.80281	2.93513	3.3249	2.97763	0.972975
31.9455	37.9279	45.807	40.444	41.64	30.8156	37.0218	46.7484	51.9291	53.2665	41.6353	30.2896		1.27278	2.93703	1.0039	1.97707	1.31806		1.57529	2.41434	3.32507	2.9782	0.973071
33.0182	49.1028	59.6098	45.2954	36.6746	32.0005	37.1728	51.8073	63.5171	54.7964	46.4852	31.2034		1.27296	3.58316	1.00429	1.97711	1.31808		2.27157	4.08917	3.32512	2.97851	0.973213
35.122	34.1971	38.03	53.4567	40.5383	32.6545	34.0451	46.6903	56.3291	53.2989	43.9614	31.3265		1.27302	1.90657	1.00504	1.97783	1.31811		2.15407	3.79601	3.32523	2.97863	0.973304
30.9281	39.799	44.0172	50.0032	39.4944	29.5933	38.6111	50.5265	58.1647	56.6189	44.2905	31.2267		1.27321	1.95051	1.006	1.97926	1.31826		1.88224	3.08884	3.32525	2.97883	0.973442
27.7837	37.8597	46.9883	48.9177	40.4107	30.9544	36.8947	50.4482	60.6822	54.6515	45.6149	30.5377		1.27322	3.32471	1.00936	1.97959	1.31831		2.16487	3.79954	3.32559	2.9789	0.973555
31.7499	34.1425	40.5496	53.5542	42.6544	31.4907	33.8055	45.409	53.6576	53.5698	43.1722	30.7354		1.27325	2.63108	1.00998	1.98137	1.31853		1.98983	3.40434	3.32587	2.9789	0.973674
30.1769	47.9869	57.6934	47.7632	41.0241	29.9537	38.2277	53.9541	66.9894	57.8205	45.6968	31.2414		1.27336	3.35968	1.01187	1.98155	1.31857		2.54981	4.66327	3.32588	2.97894	0.973701
26.5216	38.7422	44.5211	50.5496	32.3907	30.7696	35.2875	49.7268	61.6445	52.4441	44.7741	32.0262		1.27344	2.44864	1.01201	1.98157	1.31864		2.4112	4.40132	3.32591	2.97905	0.973749
30.7843	38.9102	45.0601	39.4779	42.1074	30.6906	36.5256	51.2975	63.3767	58.5533	43.338	31.6477		1.27345	2.62728	1.01642	1.98288	1.31866		2.45082	4.45487	3.32612	2.97929	0.973891
27.8065	40.9076	46.5214	43.6216	41.8942	31.4812	36.8323	51.0988	62.363	54.0053	47.5663	31.4694		1.27347	2.42532	1.01774	1.98408	1.31872		2.32388	4.15871	3.32622	2.97941	0.974018
31.2059	41.2008	49.6065	49.4288	41.4902	31.5439	36.0601	45.5967	50.7194	53.2594	44.9584	31.1517		1.27349	3.1337	1.01866	1.98453	1.3195		1.54434	2.37391	3.32646	2.97951	0.974056
27.6251	40.7616	47.5009	41.2489	39.9366	32.0635	36.6406	48.9929	57.6285	56.8126	44.8884	30.8098		1.2735	2.76575	1.0189	1.98474	1.31975		2.0077	3.41131	3.3271	2.97976	0.974255
32.8041	44.4089	54.4618	49.8862	40.9034	30.6943	35.2723	46.313	53.494	52.4196	44.3254	31.8046		1.27355	3.67287	1.0191	1.98674	1.31989		1.8938	3.12556	3.32721	2.98016	0.974262
28.7342	35.356	39.1838	54.9571	38.5963	32.1674	35.7739	45.0221	49.8447	55.112	46.0024	31.009		1.27372	1.84518	1.01969	1.98759	1.31994		1.55337	2.36341	3.32755	2.98076	0.974304
27.5097	39.3718	45.8032	46.6532	44.9583	32.8465	37.6364	48.5119	55.0077	61.6037	45.944	31.2792		1.27374	2.78221	1.02054	1.98763	1.32019		1.71217	2.73481	3.3278	2.98083	0.974319
28.7021	34.9022	39.5603	49.7946	43.9533	30.9087	34.9513	45.5574	52.2382	51.1864	43.5786	31.7257		1.27376	2.16896	1.0216	1.98857	1.3203		1.81042	2.95082	3.32789	2.98086	0.974884
28.1702	44.7652	52.2575	45.3277	38.5401	30.5806	33.6439	44.6746	52.1854	58.1164	44.7784	31.3517		1.27387	2.78569	1.02234	1.98874	1.32036		1.92165	3.23009	3.328	2.98103	0.974956
32.7922	32.4928	36.6197	52.3428	45.2571	30.8104	36.5683	50.0456	60.2507	52.7863	46.51	31.1195		1.27441	1.95126	1.02311	1.98945	1.32045		2.21409	3.8906	3.328	2.98117	0.974989
27.1338	43.2293	49.4407	50.0926	45.5148	31.0052	32.6648	42.3104	48.2113	54.6674	44.0513	32.3013		1.27447	2.5684	1.02398	1.99073	1.32048		1.71139	2.75836	3.32876	2.98144	0.975251
27.8499	37.1384	43.9612	50.2633	37.757	33.7043	34.374	43.9762	49.4925	55.7903	45.518	31.9148		1.2745	2.74099	1.02399	1.99091	1.32056		1.6647	2.62104	3.32889	2.98164	0.975626
28.0734	41.3822	49.4145	43.734	40.4974	30.8574	35.2501	48.9797	59.8694	57.7008	45.3818	32.2937		1.27473	2.99476	1.02417	1.99252	1.32107		2.26187	4.0559	3.3289	2.98198	0.975715
30.2376	39.8668	48.9316	49.8375	39.0524	30.9358	35.7961	45.3603	50.5652	53.8313	47.1085	30.9693		1.27484	3.34748	1.02538	1.99346	1.32134		1.55347	2.39885	3.32911	2.98214	0.975991
31.4858	36.5747	43.1719	42.7424	41.2186	31.3792	35.9195	46.5254	53.0133	52.4281	44.213	32.2887		1.27484	2.70961	1.02613	1.99516	1.32136		1.77668	2.86352	3.3292	2.98256	0.976027
27.5536	39.9272	47.2011	45.8142	41.7847	31.345	35.8012	45.2169	50.2388	51.2215	45.2772	30.7764		1.27493	2.96045	1.02618	1.99617	1.3215		1.59859	2.45119	3.32932	2.98267	0.976077
30.2374	41.9934	50.6983	50.5736	42.297	30.6514	33.9652	47.1594	57.6018	54.0037	42.7015	30.7094		1.27516	3.00468	1.02639	1.99634	1.322		2.22949	3.99401	3.32934	2.98274	0.97629
25.8972	40.5374	48.0631	44.6865	37.9842	31.3592	35.4277	47.9286	57.0402	51.1851	46.1711	31.4961		1.2752	3.03742	1.02695	1.9972	1.32219		2.02849	3.50701	3.32936	2.98274	0.976344
28.1194	43.2494	52.5217	54.444	43.4752	31.0732	36.8253	50.2258	60.2618	53.0337	45.3413	31.4173		1.27524	3.31072	1.02756	1.99763	1.32239		2.16893	3.79329	3.32939	2.98285	0.976413
28.1284	38.5489	43.9946	52.3379	40.7251	32.3739	34.2167	48.0116	59.2638	55.5149	45.2298	31.2605		1.27529	2.4421	1.02809	1.99876	1.32279		2.33539	4.2403	3.32954	2.98308	0.976425
26.3512	35.8682	39.8456	45.0273	43.0423	31.1282	37.6103	52.6363	64.8036	49.7406	44.9139	32.3457		1.27533	1.86809	1.02824	1.9991	1.32292		2.31457	4.18878	3.32977	2.98316	0.97644
28.7642	43.7028	51.139	47.5092	41.5661	31.0892	37.0062	48.0348	54.8493	55.5815	45.0627	31.6034		1.27543	2.7525	1.02853	1.9996	1.32301		1.76669	2.85833	3.33028	2.98333	0.976688
29.4296	37.4665	44.633	47.8143	39.9588	32.1094	33.7762	47.56	58.9125	56.5535	44.2142	32.6226		1.27548	2.85119	1.0296	2.0012	1.3238		2.38498	4.34927	3.33066	2.98338	0.976861
27.3496	43.2802	52.4483	27.3929	39.3109	31.283	38.0887	50.3136	58.4669	54.6302	42.3914	31.0712		1.2755	3.45855	1.03045	2.00157	1.32386		1.95624	3.26091	3.33078	2.98347	0.977224
31.0861	39.4764	46.0238	54.9762	45.4256	32.2815	38.1221	52.1265	62.7011	50.2135	43.1412	30.2382		1.27556	2.52444	1.03061	2.00249	1.32394		2.25289	3.95402	3.33102	2.98398	0.977238
32.0407	41.123	47.9309	27.8434	41.7145	32.156	36.3298	47.7531	55.2172	53.2088	44.0558	30.5861		1.2756	2.66653	1.0313	2.00352	1.32404		1.89554	3.1341	3.33115	2.98404	0.977338
34.0933	38.8096	44.9326	52.2328	42.5522	32.3691	36.6282	48.9824	57.6234	56.7292	45.1175	31.3882		1.2758	2.59159	1.0319	2.0044	1.3242		1.98933	3.38074	3.3314	2.98408	0.977466
28.1049	36.8908	41.3537	52.0618	42.8856	32.0214	37.206	50.2348	59.6666	54.2426	46.5732	30.9311		1.27611	1.99368	1.03231	2.00507	1.32466		2.13447	3.67965	3.33141	2.9842	0.977774
29.7121	50.749	62.7802	51.9752	28.0298	30.7772	34.744	46.1002	53.8097	50.4075	43.7383	31.6879		1.27612	3.86749	1.033	2.00517	1.32468		1.89675	3.18441	3.33222	2.98425	0.977827
28.8291	36.8127	41.6008	48.4534	42.3704	31.7153	36.1	47.0607	53.9689	51.3227	44.3589	30.3508		1.27612	2.30601	1.03345	2.00522	1.32472		1.76506	2.87752	3.33316	2.98458	0.977968
29.5453	34.3772	38.2501	45.6745	43.8456	30.2311	34.3805	46.3734	55.0251	54.5834	44.6492	31.6925		1.27627	1.84935	1.03645	2.00682	1.32491		2.03472	3.50256	3.33328	2.98458	0.978133
32.045	39.5155	48.9296	41.4107	42.9082	31.7059	35.4295	46.127	52.83	56.7151	43.7839	32.594		1.27627	3.4528	1.03676	2.00928	1.3252		1.78449	2.90262	3.33334	2.9846	0.978425
33.5208	40.0586	49.6385	40.6705	41.0335	30.8731	38.126	48.6516	54.6145	53.557	44.0473	32.1685		1.2763	3.49437	1.03899	2.01008	1.3253		1.65847	2.598	3.33354	2.98461	0.978492
32.5295	32.8301	38.8033	42.5985	43.5604	32.4577	36.2421	51.0792	63.3299	53.0367	45.6742	31.1481		1.27632	2.47673	1.03975	2.01263	1.32532		2.47496	4.51849	3.33388	2.98499	0.97859
31.2052	40.3646	47.088	50.3357	42.8225	31.5209	35.2457	45.037	50.6252	56.6676	48.4246	32.3225		1.27638	2.78699	1.03989	2.01366	1.32586		1.63243	2.56411	3.33397	2.9851	0.978785
29.4002	39.2919	48.1747	47.1101	34.0314	32.6018	35.6785	49.2916	59.9065	59.2276	45.4378	31.7552		1.27664	3.16117	1.04048	2.01381	1.32588		2.32285	4.13409	3.33405	2.98524	0.978837
28.0428	40.2827	45.2119	50.7923	38.8848	31.8917	35.523	49.2509	60.0693	53.1441	43.4245	31.2249		1.27673	2.08142	1.04124	2.0141	1.32589		2.27869	4.07444	3.3341	2.98539	0.97896
29.2829	36.5511	41.2024	45.3047	40.9042	31.538	33.9908	44.054	50.2277	52.6003	43.3544	30.1746		1.27675	2.15151	1.04423	2.01522	1.32592		1.71784	2.77173	3.33411	2.98543	0.979044
28.9782	40.6843	49.2516	41.1676	39.5946	31.7685	32.5063	45.8854	56.9793	54.1086	45.6942	31.3365		1.27686	3.40563	1.04494	2.01673	1.32607		2.37698	4.34794	3.33445	2.98557	0.979165
26.9053	37.4219	43.8582	47.3608	38.2481	31.386	34.3581	43.4454	48.3272	59.9216	44.123	31.9224		1.27708	2.67103	1.04536	2.02017	1.32655		1.57679	2.42387	3.33449	2.98558	0.979209
25.7628	36.5142	41.694	47.5433	38.7498	32.4936	34.6953	45.1812	51.7582	54.9231	45.3053	31.5215		1.27715	2.39135	1.0458	2.02215	1.32656		1.69158	2.75257	3.33454	2.98589	0.979344
32.142	37.8521	42.0182	47.9557	44.4052	32.4745	34.4099	43.8397	49.1345	51.9322	43.3055	30.3543		1.27723	2.00711	1.04725	2.02268	1.32668		1.64436	2.56765	3.33493	2.98591	0.97936
26.6726	40.6702	49.7894	47.9942	44.2607	31.2587	36.7666	50.281	60.4908	54.0252	42.8381	31.9053		1.27728	3.52073	1.04772	2.02286	1.32751		2.18119	3.82901	3.33509	2.98595	0.97957
31.8351	39.5144	47.3884	46.408	43.6774	30.8146	33.3476	43.6508	50.2637	55.3608	44.9217	30.9228		1.2773	2.9977	1.04988	2.02357	1.32758		1.83442	3.01181	3.33511	2.98609	0.979597
29.8547	35.3224	41.5188	52.1672	40.8177	31.6913	37.3945	49.6874	58.0789	52.7219	44.2506	30.3097		1.27734	2.53458	1.05017	2.02549	1.32772		1.90705	3.20886	3.33512	2.98613	0.980049
26.5421	43.1808	52.2475	50.6657	37.2634	31.3974	36.7133	46.6017	52.0371	56.6051	44.9777	31.1475		1.27735	3.18186	1.05055	2.02597	1.32773		1.6262	2.5201	3.33578	2.9863	0.980115
28.8346	39.8898	47.3719	50.0707	43.0873	31.6492	34.3102	45.0074	51.9371	54.3407	46.1621	32.1209		1.2775	2.97762	1.0546	2.02625	1.32798		1.77266	2.92101	3.33589	2.98636	0.980163
31.8988	32.9188	37.9256	46.1223	36.9913	29.4529	36.9263	47.9094	54.6813	57.3183	43.2642	31.5442		1.27753	2.21539	1.05585	2.02701	1.32813		1.74722	2.82452	3.33603	2.98636	0.98038
27.7172	37.874	44.5784	35.6776	43.5278	31.381	34.3721	45.7918	53.6664	54.3542	48.2299	31.9422		1.27753	2.64711	1.0568	2.02705	1.32828		1.94849	3.29211	3.33638	2.98645	0.98045
28.0233	34.7738	39.8837	40.6912	40.7403	32.5214	34.0913	46.6178	56.0783	54.4464	46.605	31.8193		1.27762	2.17959	1.05837	2.02751	1.32829		2.11868	3.71878	3.33655	2.98646	0.980532
31.9191	39.4266	47.6609	45.9365	41.9294	31.8184	35.2769	44.8767	50.221	51.6098	42.0384	33.2711		1.27762	3.30467	1.05906	2.02753	1.32834		1.59887	2.48898	3.3371	2.98675	0.980677
29.4898	37.0031	42.5311	49.7995	42.2511	31.8428	35.173	49.4661	61.1986	53.1053	43.6904	32.0027		1.27762	2.43714	1.06236	2.0276	1.32906		2.36373	4.30398	3.33712	2.98712	0.981137
29.4807	39.2862	45.654	49.5291	39.0147	32.1663	34.1323	43.7131	49.2485	53.6406	45.495	30.6134		1.27768	2.62665	1.06332	2.03018	1.32919		1.64863	2.60112	3.33743	2.98722	0.981297
29.8105	39.4387	45.5324	47.9885	43.4517	32.0684	35.053	45.8279	52.707	55.966	42.987	31.3409		1.27769	2.58382	1.0638	2.03044	1.32998		1.77767	2.91261	3.33771	2.98754	0.981347
28.8895	44.2495	53.1487	45.8484	37.2488	31.6091	36.4039	47.1299	53.6759	55.2245	44.1629	31.9276		1.27777	3.29823	1.06559	2.03062	1.33003		1.7424	2.80579	3.33818	2.98795	0.981391
27.3618	42.5289	51.7359	52.9976	41.1639	33.128	35.3536	46.1201	52.9274	57.0359	44.4022	31.6966		1.27778	3.15838	1.06598	2.0312	1.33007		1.75801	2.86956	3.33873	2.98831	0.981407
29.5554	44.6382	55.3775	41.1086	43.1315	29.9939	37.4713	47.2493	52.4115	55.3408	45.2805	31.5744		1.27782	3.92011	1.06646	2.03262	1.33019		1.49483	2.284	3.33878	2.98831	0.981424
31.0533	33.3758	38.9177	46.9394	44.4342	31.3084	36.8476	48.5872	56.3596	57.6775	45.1857	31.5604		1.27785	2.45965	1.06647	2.03301	1.33038		1.94457	3.23202	3.33913	2.98833	0.981434
34.0133	40.2356	47.1477	48.912	43.3054	31.214	33.793	47.5216	58.7882	51.9707	46.2199	31.3435		1.27789	2.75085	1.06658	2.03447	1.33086		2.33863	4.25784	3.33944	2.98834	0.98174
30.2145	43.6368	52.5003	43.6005	43.6979	30.5	33.4126	42.3663	47.2569	57.9026	45.7774	30.9168		1.27791	3.32098	1.06659	2.03454	1.33113		1.54468	2.38839	3.3401	2.98855	0.981883
27.0369	39.9379	48.1335	49.5071	43.3162	31.9949	37.2513	49.3119	57.4244	54.1324	45.3808	31.321		1.27798	2.99565	1.06671	2.03497	1.33116		1.89015	3.16156	3.34015	2.98872	0.98214
28.1292	40.1409	47.9025	49.6201	42.3815	32.7036	33.033	44.7801	53.4018	58.6845	43.692	29.9979		1.27818	2.87471	1.06733	2.03516	1.33123		2.06844	3.58656	3.34037	2.98887	0.982351
27.3152	37.2144	44.768	46.3339	34.7291	30.8684	35.8359	49.991	61.3479	52.3713	45.6527	30.8656		1.2782	3.00643	1.06737	2.0374	1.33146		2.45374	4.42241	3.34067	2.98896	0.982359
27.24	39.8518	48.2354	47.3107	46.1335	32.143	35.5539	45.9138	52.1596	52.9941	44.1238	32.7745		1.27844	3.25747	1.06892	2.03766	1.33151		1.63355	2.61838	3.34086	2.98964	0.982486
28.4123	40.0078	46.1462	41.9619	38.4104	31.1788	36.2297	46.6468	52.8339	53.9255	42.4783	33.0678		1.27851	2.61717	1.06931	2.03805	1.33173		1.71232	2.72933	3.34103	2.98985	0.982532
28.7819	39.2961	46.3309	48.3582	41.745	30.1516	38.2045	49.5702	56.5799	58.3174	47.2689	31.2456		1.27874	2.62894	1.06968	2.03806	1.33192		1.80132	2.91224	3.34107	2.99	0.982611
30.1444	36.4439	42.5473	51.7953	43.2815	30.5525	33.5731	45.7082	54.7433	57.1435	43.7539	30.4344		1.27884	2.52991	1.07061	2.03874	1.33213		2.15981	3.76788	3.34137	2.99017	0.982941
32.2429	40.8156	47.3809	43.7859	39.0659	32.4261	35.0297	44.1669	48.9883	57.7257	45.0858	30.5112		1.27888	2.68897	1.07307	2.03882	1.33224		1.52639	2.33181	3.34156	2.99018	0.982997
35.5805	36.0234	40.9745	54.4115	40.2022	31.7934	38.2075	48.6163	54.4189	51.8109	45.3739	31.4281		1.27891	2.23272	1.07355	2.03884	1.33229		1.64868	2.56776	3.34197	2.99025	0.98301
29.7144	43.7215	51.837	43.3726	44.0431	31.0952	36.1251	47.0337	53.8696	58.0159	44.1234	30.169		1.27893	3.08722	1.07357	2.03945	1.33236		1.86403	3.03213	3.34245	2.99031	0.983048
28.0052	36.4981	43.1661	47.4224	35.5759	30.8043	36.3971	49.6931	59.6842	56.1274	45.4454	31.4115		1.27897	2.70416	1.07557	2.03977	1.33239		2.18249	3.82248	3.34275	2.99042	0.983191
29.0309	39.932	48.4811	46.6413	33.3523	31.4265	37.247	52.5937	65.3296	59.4696	43.809	31.1126		1.27901	3.32136	1.07626	2.04079	1.3324		2.39411	4.38094	3.34285	2.99051	0.98355
29.6938	41.4505	46.8079	53.1451	42.8951	31.4617	35.8496	50.0011	61.3491	52.4282	44.3065	30.835		1.27903	2.24466	1.07716	2.04256	1.33246		2.26944	4.08931	3.34292	2.9907	0.983889
32.8007	42.5328	52.2775	47.984	42.4899	31.5767	32.8733	45.9109	56.4056	57.7166	46.9671	30.8599		1.27913	3.62694	1.07743	2.04275	1.33256		2.29147	4.136	3.34295	2.99091	0.984127
29.079	38.6278	43.2614	49.6282	31.0327	31.0712	38.2596	49.1981	55.6534	58.205	45.7595	31.1192		1.27939	2.1387	1.07972	2.04287	1.33301		1.69683	2.69818	3.34301	2.99094	0.984139
32.644	36.7362	43.3	49.2011	40.4397	31.6496	34.8013	46.1334	53.7985	56.7398	41.8403	30.5195		1.27955	2.58206	1.08187	2.04304	1.33312		1.93586	3.24528	3.34374	2.99128	0.984182
30.029	40.6435	45.2464	41.8115	43.1589	31.8676	37.4525	49.7317	58.0925	56.5383	44.5646	30.2589		1.27957	2.13739	1.08214	2.04329	1.33318		1.96057	3.29551	3.34378	2.99162	0.984356
27.8798	36.9329	43.5788	54.0098	41.5762	32.2663	34.8542	47.6511	57.3093	48.7321	44.9052	32.0512		1.2796	2.64995	1.08528	2.04345	1.33342		2.13736	3.75048	3.34413	2.99193	0.984584
28.483	38.4194	46.2285	50.0015	42.6104	31.5132	35.1602	47.5551	56.5818	56.2832	43.6032	30.5986		1.27979	3.12196	1.0865	2.04423	1.33353		2.09652	3.62334	3.34417	2.99206	0.984627
29.8709	48.0006	59.0404	44.3103	43.626	32.6594	34.4313	43.3176	47.9413	56.4938	47.3782	32.1938		1.2798	3.78469	1.08833	2.04475	1.33357		1.48815	2.26246	3.34419	2.99276	0.984753
31.677	38.8943	43.8299	48.6575	44.042	32.1295	34.77	48.9901	60.7222	54.4476	45.938	31.0356		1.27982	2.1412	1.0902	2.04611	1.33359		2.43072	4.43613	3.34462	2.99297	0.985099
33.0566	39.1873	47.4424	50.0231	42.3655	31.5243	34.1136	46.6021	56.0037	58.4909	44.2105	31.3043		1.27989	3.21164	1.09023	2.04824	1.3338		2.15193	3.77196	3.34468	2.99304	0.985192
27.9059	39.3057	47.0244	45.7027	42.2362	31.8398	35.9433	50.3699	62.0953	51.9078	44.2559	31.7729		1.28004	2.98274	1.09339	2.04848	1.33421		2.36828	4.29313	3.34523	2.99309	0.985241
30.2853	36.1583	42.5107	49.7753	42.1514	31.5585	38.1209	48.6495	54.6171	54.5682	45.2467	30.9611		1.28007	2.61895	1.09342	2.04964	1.33446		1.64075	2.57072	3.3454	2.99313	0.985304
34.9182	36.3557	41.7639	52.3881	41.9353	29.3047	37.269	47.3313	52.879	57.2768	44.1116	32.4298		1.28013	2.42295	1.09438	2.05138	1.33461		1.55869	2.41806	3.34545	2.9933	0.985653
29.663	37.4939	44.44	10.167	40.3478	32.3305	34.7757	46.8021	55.4101	55.7755	47.3162	31.4724		1.2802	2.86983	1.09487	2.05183	1.33474		1.99441	3.42192	3.34562	2.99354	0.985858
27.3703	36.5817	41.866	44.6594	35.1798	31.7256	35.7294	47.6336	55.8644	54.7446	44.6124	30.6101		1.28028	2.28207	1.09499	2.05353	1.33487		1.97447	3.33966	3.3457	2.99376	0.986051
25.6417	37.4749	44.8189	43.5252	41.6828	31.1796	34.2974	47.8347	58.6893	56.5137	44.8832	31.253		1.28036	2.9574	1.09553	2.05428	1.33503		2.3388	4.21413	3.34593	2.99391	0.986066
30.0328	38.8122	47.9078	48.3468	42.7418	31.368	33.5982	45.194	53.4786	52.3876	43.837	32.1286		1.28084	3.46104	1.09603	2.0546	1.33517		1.99219	3.41551	3.34596	2.99393	0.9861
27.9317	40.7312	45.7097	50.3613	40.417	32.137	36.2196	47.388	54.5416	54.6653	46.7597	32.0806		1.28084	2.20548	1.09751	2.05516	1.33527		1.79516	2.945	3.34627	2.99404	0.986143
28.8985	39.3092	47.6738	49.1133	40.841	31.5754	36.977	49.9462	59.3482	52.2255	47.0268	32.8767		1.28094	2.86652	1.09762	2.05542	1.33546		2.11808	3.65357	3.34638	2.99404	0.986176
34.4953	36.9823	43.2299	42.1932	42.746	30.3556	35.0597	46.4322	54.0961	53.9012	44.9647	31.6876		1.28106	2.46482	1.09802	2.0567	1.33555		1.89629	3.17418	3.34648	2.99407	0.986251
30.3989	36.9019	41.858	50.3427	40.387	31.961	36.1783	49.9931	60.7722	51.733	44.2419	31.6007		1.28106	2.18941	1.09884	2.0568	1.33573		2.27828	4.05595	3.34687	2.99413	0.98628
33.4734	40.343	45.8305	39.7453	41.2843	30.0355	34.1878	48.1424	59.6374	58.7077	43.3297	30.7707		1.28113	2.26857	1.09995	2.05794	1.33632		2.31677	4.2252	3.34719	2.99429	0.986319
28.842	41.4219	47.5105	33.3352	40.624	30.2819	33.9394	44.332	50.9407	53.2444	44.742	31.7007		1.28116	2.57268	1.10019	2.05821	1.33632		1.7003	2.78152	3.3474	2.99446	0.986344
26.3537	40.6585	46.8514	36.8709	41.519	32.0785	34.8691	48.5782	59.5355	54.5334	44.2857	29.9359		1.28126	2.42383	1.10066	2.05924	1.33662		2.30762	4.15204	3.34801	2.99456	0.98638
27.3169	38.3096	43.8937	43.8692	24.1943	32.1499	37.5154	48.0698	54.1839	53.0289	44.2257	31.012		1.28135	2.48803	1.10138	2.06022	1.33691		1.68622	2.66302	3.34804	2.9949	0.986493
26.5361	43.5883	52.4306	48.1626	40.8876	31.6032	35.8989	45.8679	51.555	54.4151	45.9563	31.0319		1.2814	3.12301	1.10229	2.06097	1.33693		1.63404	2.56622	3.34818	2.99501	0.986501
32.6662	39.9089	48.8481	51.5749	43.9955	31.5489	37.9299	51.1604	60.7044	56.3734	43.803	31.0042		1.28142	3.57946	1.10278	2.06145	1.33711		2.06878	3.56112	3.34887	2.9951	0.986769
28.7162	34.0974	38.5237	52.7554	42.9255	31.7001	36.8106	46.6716	52.0556	56.9833	44.398	32.194		1.28148	1.95033	1.10347	2.06387	1.33723		1.60916	2.48773	3.3491	2.99547	0.986797
30.3809	41.5464	49.548	40.4629	37.5453	29.9468	36.052	45.6784	50.9127	51.9787	44.2066	31.03		1.28153	3.20897	1.10374	2.06395	1.33805		1.56196	2.41128	3.34913	2.99569	0.987032
26.0195	41.6322	48.6134	52.886	37.6385	31.4932	37.2786	47.3499	52.907	56.9831	45.6173	31.317		1.28162	2.7698	1.1039	2.06449	1.33829		1.64241	2.54865	3.34915	2.99592	0.987235
35.3748	37.7683	43.376	47.0847	42.0232	31.3532	38.0279	52.8035	64.4996	57.8816	43.9732	30.3569		1.28167	2.34648	1.10563	2.06602	1.33835		2.24817	4.02779	3.34915	2.99611	0.987638
32.3489	39.443	47.5649	52.9101	42.4413	32.7563	34.4544	47.2292	56.9522	55.8738	45.3425	32.0209		1.28178	3.19722	1.10584	2.06676	1.33857		2.15351	3.79258	3.34954	2.99643	0.987725
30.5491	40.3164	49.7225	43.0296	43.0053	31.7067	33.1676	41.636	45.9788	59.0344	44.377	30.2834		1.28181	3.33012	1.10609	2.06713	1.33873		1.4617	2.21129	3.34954	2.99648	0.987845
34.8004	40.3925	45.6429	46.6857	42.6652	29.6998	35.1273	46.9628	55.2329	59.4438	43.8194	31.9346		1.28189	2.22858	1.10611	2.06769	1.33877		2.0551	3.49111	3.34962	2.99648	0.987888
31.9466	37.2792	41.8236	21.4466	43.186	31.828	36.9229	49.1651	57.5907	58.737	47.1906	30.9277		1.28196	2.03324	1.10625	2.06796	1.33945		1.89858	3.20526	3.34988	2.99657	0.987895
30.8902	33.9749	38.9089	47.6564	37.8831	31.9253	34.5548	47.5976	57.676	52.0555	45.5466	32.1621		1.28215	2.14819	1.10647	2.06849	1.33957		2.15372	3.81794	3.34989	2.99668	0.987903
29.2133	43.1209	50.5727	51.4672	38.2944	32.0129	34.3004	45.7838	53.76	52.0381	42.2331	31.4		1.28219	3.08558	1.10698	2.06903	1.33969		1.95564	3.31398	3.35	2.99726	0.987908
28.3189	44.2289	53.2125	48.4436	34.8468	31.1488	34.4899	44.2912	50.0354	55.8225	47.1936	31.4298		1.28223	3.28766	1.1075	2.06975	1.33982		1.67146	2.65104	3.35022	2.99728	0.98798
26.3379	38.3777	47.3174	55.1873	40.6152	31.7413	34.8248	48.305	58.9427	55.2509	46.2274	31.2547		1.28225	3.58398	1.1104	2.06982	1.33991		2.2001	3.93628	3.35041	2.99729	0.987983
30.1918	38.8366	45.9398	48.788	36.0181	31.6163	38.2228	53.5641	66.0327	56.5903	46.1164	32.2213		1.28249	2.68989	1.11205	2.0706	1.34035		2.31984	4.20529	3.35074	2.99761	0.988156
27.135	38.1219	45.5703	47.676	41.8881	31.4532	34.4855	46.9109	56.1366	56.5498	46.1734	31.4363		1.28262	2.90204	1.11245	2.07164	1.34037		2.09907	3.65758	3.35082	2.99766	0.988253
30.7988	41.3725	51.2231	43.6423	39.8719	31.8056	36.4745	46.0048	51.0448	57.6095	44.6563	30.2693		1.28263	3.66962	1.11376	2.07209	1.34041		1.52092	2.32524	3.35096	2.9978	0.98836
31.1075	41.7818	51.8638	49.346	43.9782	32.1064	34.2358	47.5391	58.0705	51.9257	43.4065	31.204		1.28264	3.56362	1.11383	2.07215	1.34073		2.29798	4.11715	3.35116	2.99788	0.988581
29.9034	39.5742	48.889	34.6017	41.971	31.4924	36.5914	47.2508	53.6752	54.7121	44.2979	30.8086		1.28268	3.39191	1.1142	2.07395	1.34088		1.73653	2.78313	3.35121	2.99797	0.988668
29.2592	38.3142	43.2592	36.0277	39.7241	30.5935	35.5279	45.3732	50.9758	54.3864	44.6495	31.2441		1.28269	2.18472	1.11471	2.07401	1.34089		1.59225	2.49834	3.3513	2.99805	0.98887
26.9169	37.9274	46.6055	44.4177	39.6108	31.1697	34.9661	47.23	56.1205	54.3392	40.9727	31.6356		1.28272	3.39959	1.11812	2.07412	1.34093		2.04547	3.52831	3.35134	2.99808	0.988945
26.3775	36.1993	42.3468	47.4517	41.3986	31.4294	35.1618	46.1759	53.3451	56.3518	47.5727	31.3449		1.28281	2.485	1.11833	2.07414	1.34096		1.7893	2.95396	3.35134	2.99822	0.989232
30.4167	38.7726	43.7317	43.4335	40.7482	31.0431	35.9876	50.6973	62.8277	55.38	42.82	31.9738		1.28287	2.16806	1.11897	2.07442	1.34098		2.47763	4.52082	3.35141	2.99832	0.989305
30.6851	37.8436	46.6391	49.1414	41.45	31.1338	38.5061	51.028	59.4869	57.0665	42.9442	31.8399		1.28291	3.18198	1.12014	2.0749	1.34117		1.95516	3.27593	3.35148	2.99846	0.989759
26.6514	50.8615	62.4559	48.3005	39.8712	32.0147	37.5798	52.5749	64.7047	51.7313	44.8966	32.7668		1.28297	3.7438	1.12038	2.07577	1.3414		2.36949	4.28623	3.3516	2.99867	0.990031
27.7807	42.5549	49.061	36.0604	42.8408	30.8118	39.1292	52.3417	61.5927	55.7122	44.7178	29.9463		1.28301	2.69306	1.12111	2.07593	1.34166		1.97599	3.35952	3.35171	2.99868	0.990077
29.5599	39.6953	46.6101	46.4671	39.9431	32.9769	35.7434	47.0699	54.5286	54.347	46.5623	31.0242		1.28302	2.77484	1.12138	2.0775	1.34167		1.87622	3.11175	3.35177	2.99892	0.990245
31.0969	39.0266	45.3993	35.28	39.4923	31.415	35.6125	46.3359	53.0355	53.1977	46.7079	31.4164		1.28303	2.44801	1.12174	2.078	1.34168		1.7604	2.86025	3.35183	2.99905	0.990252
28.3524	39.1177	46.4234	44.3044	43.2695	28.9379	35.4915	45.0138	50.2227	50.8039	48.3122	30.7027		1.28304	2.93805	1.12238	2.07833	1.34179		1.5229	2.35597	3.35194	2.99919	0.990289
31.7376	39.6076	47.0893	53.2498	35.343	32.8373	32.9208	44.4899	52.8915	55.9836	43.7802	31.57		1.28314	2.94416	1.12319	2.07841	1.3421		1.9826	3.4224	3.35197	2.99926	0.990315
25.975	36.6478	44.2199	44.0667	42.2157	33.3831	34.0013	45.5753	53.7401	55.1718	44.6638	32.7707		1.28322	3.04285	1.12487	2.08081	1.34259		1.97062	3.36077	3.35225	2.99934	0.99038
29.5982	35.7739	40.8722	48.0288	45.3299	30.9933	36.7995	47.2777	53.4323	57.9433	46.3998	32.4976		1.28332	2.32622	1.12491	2.08083	1.34259		1.66264	2.63924	3.35229	2.99947	0.990403
28.9193	41.7986	49.6046	51.334	42.8588	30.4785	33.7448	46.3174	55.9261	51.3056	44.6784	31.0261		1.28337	3.14605	1.12509	2.082	1.34272		2.11183	3.72582	3.35242	2.99989	0.990424
31.3571	38.8913	47.1979	49.314	43.7243	31.9886	37.2233	51.3525	62.3222	53.7909	49.5952	32.4026		1.28343	3.05809	1.12536	2.08324	1.34284		2.2268	3.95565	3.35261	3.00026	0.990451
31.2947	40.7464	47.361	45.3911	38.4488	31.5565	36.083	47.0792	54.0369	52.0456	43.6677	29.8502		1.28346	2.68547	1.12553	2.08348	1.34287		1.76632	2.88393	3.35283	3.00055	0.990486
28.1559	39.3583	43.6421	50.621	42.4687	31.1604	34.582	43.9486	49.1331	52.6694	43.3274	31.6667		1.28349	1.99905	1.12557	2.0846	1.34316		1.60263	2.4897	3.35312	3.00064	0.990543
29.3648	40.9802	50.3953	51.306	41.262	30.5146	38.864	52.63	62.6978	56.7698	43.6762	33.28		1.28352	3.64053	1.12578	2.08464	1.34334		2.08421	3.60852	3.35342	3.00146	0.990699
30.8922	39.3489	45.5743	47.8806	41.2206	32.2568	34.267	48.1551	59.531	53.8825	45.7934	31.4411		1.2836	2.81069	1.12598	2.08478	1.34387		2.43863	4.43614	3.35348	3.00163	0.990847
27.6121	36.1412	41.2389	50.9014	43.6387	31.5096	36.3461	51.3006	63.6974	58.2288	43.0241	30.223		1.28362	2.22187	1.12798	2.08519	1.34406		2.43381	4.45136	3.35349	3.00169	0.991066
26.4326	38.9419	45.5802	34.1439	41.7063	31.1596	33.8433	45.5375	53.9013	52.2163	45.1022	32.97		1.28367	2.76702	1.13018	2.08524	1.3443		2.0237	3.47108	3.35383	3.0017	0.991166
32.7845	37.9057	44.2783	54.3275	23.7816	31.406	34.2347	45.5463	53.3057	55.7376	45.0753	31.0656		1.28375	2.56866	1.13132	2.08563	1.34437		1.87457	3.16046	3.35489	3.00178	0.991232
27.86	43.2248	51.014	30.4109	24.5945	31.2368	32.4629	45.5702	56.274	50.6264	46.6785	31.8353		1.28375	2.81183	1.13217	2.08762	1.34468		2.2923	4.16427	3.35499	3.00182	0.991235
32.5711	40.7799	50.5594	38.3789	37.7911	30.7077	36.4859	46.2468	51.567	52.8779	44.5742	30.0918		1.28376	3.568	1.13219	2.08794	1.34496		1.6159	2.49667	3.3551	3.00191	0.991275
27.3355	40.848	50.6651	45.0625	44.2156	31.8473	37.3674	50.6222	60.3287	57.5975	45.2356	30.7612		1.28378	3.45735	1.13346	2.08958	1.3453		2.06589	3.57873	3.35545	3.00221	0.991366
28.1065	35	40.5808	41.5689	45.4358	30.649	34.1302	48.1978	59.8755	51.1769	46.5659	31.4434		1.28385	2.46114	1.13348	2.0896	1.34548		2.38653	4.36763	3.35575	3.00241	0.99146
30.5993	40.5363	48.7646	48.5571	44.5603	31.3034	38.4722	53.4799	65.3988	54.9729	44.7068	30.7715		1.28404	3.35959	1.13435	2.08962	1.34551		2.34122	4.20056	3.35583	3.00243	0.991625
28.6383	38.8523	43.9866	31.6348	40.6599	31.7651	33.61	44.6176	52.1049	54.3669	47.2393	32.3722		1.2841	2.13645	1.13476	2.09098	1.34551		1.8711	3.1438	3.35588	3.00257	0.991628
30.4235	41.6402	47.0003	51.4279	42.5566	31.2787	36.8768	46.9613	52.6091	55.519	45.1367	31.539		1.28419	2.30624	1.13514	2.09372	1.34555		1.60722	2.50735	3.35593	3.00259	0.991838
28.0364	35.8109	39.6943	53.6893	44.1588	29.9433	34.9141	46.7564	55.0827	52.3178	45.5009	30.647		1.2843	1.94566	1.13543	2.09376	1.34557		1.98926	3.38791	3.35607	3.00267	0.991862
31.0887	47.3361	56.91	47.303	44.2939	31.2313	33.5885	47.4772	59.0355	51.092	43.7704	33.053		1.28431	3.21173	1.13648	2.09502	1.34562		2.41529	4.42532	3.35642	3.00269	0.991962
31.0833	36.8594	42.1815	53.2726	42.6165	30.4331	34.6376	44.6751	50.6896	53.608	46.6326	30.5537		1.28447	2.47166	1.13776	2.09597	1.34574		1.72677	2.76144	3.35656	3.00274	0.991993
26.4905	37.1947	42.4929	45.0938	41.8037	31.2511	35.5053	47.0855	54.9306	54.699	45.1099	31.776		1.28474	2.41418	1.13813	2.09724	1.34628		1.89429	3.17761	3.35679	3.00278	0.992329
29.8466	37.815	44.6932	35.5861	32.1795	31.4203	35.3253	46.0561	52.8229	55.7041	45.4156	31.0245		1.28475	2.68082	1.14068	2.09743	1.34636		1.73194	2.8241	3.35683	3.00335	0.992416
27.4194	40.3698	48.4249	28.5824	42.365	30.9397	35.3425	46.7291	54.3514	50.4583	44.3937	31.0847		1.28479	3.10113	1.1412	2.09754	1.3464		1.87316	3.12709	3.35718	3.00342	0.992566
30.7369	37.803	43.3823	47.591	43.8111	30.3395	36.9643	52.2893	65.0694	55.3275	43.0315	30.8234		1.28483	2.52299	1.1416	2.09764	1.34642		2.41934	4.43694	3.3576	3.00353	0.992645
33.6023	38.0705	44.3324	50.4791	43.4394	31.0153	36.0285	48.0573	56.3905	55.3026	44.5097	32.8699		1.28489	2.46273	1.1431	2.0978	1.34664		1.90361	3.22238	3.35783	3.00366	0.992718
31.0245	35.8112	43.3642	53.0134	37.9965	31.2958	34.8298	48.0947	58.4223	54.8923	41.8868	31.9709		1.28491	2.89532	1.14338	2.09829	1.34669		2.24402	3.99112	3.35803	3.00369	0.992726
31.7942	45.9546	52.8337	44.6437	44.3936	30.5238	38.6603	50.0961	57.1053	57.0448	45.6524	32.5115		1.28492	2.75396	1.14442	2.09855	1.34676		1.77197	2.85805	3.35804	3.00382	0.992726
30.1467	37.5006	44.5294	39.0919	45.1851	31.5275	34.2103	45.2772	52.7152	58.3432	42.7848	31.7857		1.28501	2.83177	1.14608	2.09855	1.34681		1.88659	3.15457	3.3581	3.00394	0.992809
28.6356	33.0486	36.712	44.6367	33.5543	31.7503	37.8018	51.8977	62.6785	60.9355	45.6352	31.3628		1.28504	1.75118	1.14698	2.09934	1.34687		2.22561	3.92778	3.35824	3.00394	0.992859
27.8476	37.1722	41.7425	47.3073	39.9109	30.3304	36.4015	46.9683	53.312	53.5509	45.138	30.9122		1.28512	2.15952	1.14851	2.1026	1.34689		1.70738	2.73238	3.35839	3.00395	0.992996
26.3293	37.3778	42.368	49.4047	39.5364	30.801	35.7269	45.8605	51.7865	57.3612	44.8547	30.4882		1.2854	2.2358	1.14882	2.10274	1.34708		1.67486	2.65429	3.35867	3.00411	0.993045
28.8266	40.14	49.8856	48.2925	32.6076	30.2197	36.0368	47.7377	55.6302	58.0974	45.1083	31.6234		1.28544	3.46231	1.14928	2.10295	1.34718		1.89554	3.17413	3.35875	3.00422	0.993165
27.0022	39.4156	44.222	53.6191	43.2968	31.0374	38.1613	49.365	56.1758	56.2715	45.3459	31.7705		1.28563	1.99235	1.15127	2.10295	1.34751		1.76185	2.83289	3.35903	3.00442	0.993167
29.0562	41.0523	46.9843	50.4916	37.8558	32.5537	33.1659	43.7705	50.8167	54.4169	45.4974	30.4214		1.28567	2.56027	1.15138	2.10328	1.34751		1.87637	3.1231	3.35963	3.00451	0.993264
28.3824	40.6214	50.2764	53.4492	43.8018	32.8582	33.7153	44.5171	51.7085	54.1654	43.5966	32.664		1.28567	3.65518	1.15309	2.1034	1.34774		1.8694	3.11397	3.35967	3.00451	0.993563
30.3053	39.8332	44.294	43.9746	24.9436	32.026	36.4427	48.3927	56.5305	56.5619	44.8057	31.9576		1.28579	1.95811	1.1531	2.10401	1.34778		1.92772	3.24049	3.36025	3.00467	0.993994
29.34	41.7197	49.3662	41.9622	40.5008	32.8194	36.8244	46.4744	51.5972	51.6445	45.5358	31.9336		1.28629	2.97851	1.15366	2.10415	1.34782		1.52935	2.34122	3.36061	3.00487	0.994136
27.2341	38.7297	46.2831	45.8933	23.4981	31.5663	36.7713	48.0756	55.2937	51.7032	43.1721	32.4643		1.28629	3.00577	1.15431	2.10418	1.34787		1.82524	2.9907	3.36064	3.00489	0.99428
31.3735	39.1736	44.9152	50.0962	42.9088	31.1903	35.6521	46.9884	54.4791	56.7759	45.3503	31.044		1.28645	2.57855	1.15448	2.10432	1.34794		1.81295	3.0109	3.36116	3.0052	0.994454
29.7996	40.5528	50.2921	53.0235	45.4738	31.7781	35.2839	46.8122	54.6356	55.4821	44.7439	32.499		1.28648	3.45916	1.15513	2.10458	1.34813		1.88763	3.16863	3.36131	3.00557	0.994593
29.9274	40.8745	49.2167	41.7307	40.83	31.8879	36.0897	48.7567	57.9454	57.2361	43.9258	31.2085		1.28659	3.23218	1.15713	2.10583	1.34816		2.07348	3.57761	3.36138	3.006	0.994697
28.8321	42.8224	52.5348	50.6229	41.6529	31.7046	37.4056	50.0227	58.848	56.9841	45.1899	32.5855		1.28674	3.56719	1.15862	2.10661	1.34818		2.00088	3.40044	3.36184	3.00601	0.994717
29.615	36.9745	44.0049	27.99	41.4451	31.2117	37.6974	48.5385	54.9788	51.7125	43.5899	31.7441		1.28676	2.976	1.16173	2.10927	1.34825		1.71266	2.73009	3.36187	3.00622	0.99486
28.1737	39.0575	45.6573	49.853	41.9759	30.8522	34.8323	46.3821	54.3317	56.2183	44.34	32.2591		1.28677	2.79188	1.16375	2.10929	1.34832		1.86071	3.14141	3.36208	3.00635	0.995054
29.8169	42.0926	51.5008	52.2824	42.1878	31.8924	37.024	49.9769	59.3457	54.2053	45.086	30.5766		1.28681	3.48103	1.1643	2.1108	1.34854		2.02893	3.49645	3.36226	3.00635	0.995166
29.3267	39.6548	47.431	52.2875	42.235	30.6565	36.5192	47.0501	53.3253	59.8249	41.5858	31.2126		1.28708	2.93779	1.16648	2.11138	1.3487		1.67753	2.67716	3.36305	3.00636	0.995172
27.2931	37.0035	44.0351	46.249	40.8038	31.0606	36.379	45.8217	50.7723	52.3567	44.1426	31.9942		1.28722	2.78534	1.16746	2.11161	1.34874		1.55121	2.36447	3.36317	3.00646	0.995172
32.7039	41.9843	52.1454	48.7663	40.8253	31.6933	35.4268	45.7581	51.9922	50.9691	47.1643	31.8736		1.28725	3.7224	1.1675	2.11167	1.34894		1.69958	2.72514	3.36321	3.00669	0.99518
27.8363	44.7649	52.4609	49.9408	39.984	31.6293	34.8354	44.3141	49.5905	56.8465	44.3817	32.2513		1.28736	2.81566	1.16782	2.11258	1.34896		1.61726	2.51751	3.36325	3.00675	0.995412
31.3285	35.6456	43.4379	40.4658	41.5586	31.273	33.662	43.8709	50.2975	54.9281	44.686	31.1032		1.28743	3.11208	1.17065	2.11301	1.34897		1.75448	2.85896	3.36336	3.00706	0.995737
28.0359	36.8756	41.3149	48.4301	44.0486	31.2215	34.7479	45.1174	51.5341	52.4411	44.6583	30.7631		1.28747	1.9594	1.17072	2.11391	1.34908		1.75697	2.84418	3.36373	3.00707	0.99579
28.5631	39.0521	46.9454	48.9117	43.825	31.6356	33.0299	43.0296	49.3131	54.7326	47.1967	32.6344		1.2875	2.91494	1.17134	2.1153	1.34915		1.7717	2.88497	3.36404	3.00717	0.995803
34.4956	42.0048	50.2987	51.1327	44.593	31.4217	34.1772	43.2885	48.233	55.6498	46.1754	31.3137		1.28756	3.02992	1.17244	2.11557	1.34935		1.57552	2.4305	3.36405	3.00741	0.995997
27.1259	38.7933	46.1034	43.2313	42.1352	31.3991	37.8365	47.8505	53.2348	55.6659	46.2702	31.2922		1.28756	3.05487	1.17244	2.11577	1.34945		1.57875	2.42762	3.36413	3.00756	0.996024
29.1724	39.1344	44.1613	50.9024	40.009	32.1463	36.6306	48.6971	56.9503	56.5267	44.6504	30.5941		1.28768	2.1097	1.17255	2.11622	1.34972		1.9467	3.27821	3.36413	3.00779	0.996057
28.9716	42.7732	51.5228	48.1956	41.4649	31.0411	37.8341	52.7588	64.7203	55.6869	44.0322	30.5793		1.28771	3.28299	1.17279	2.11695	1.34994		2.33872	4.2131	3.36455	3.00786	0.996089
27.3589	39.7729	46.8503	44.7987	46.6797	31.9048	35.1619	44.3329	49.1715	55.2447	44.2884	31.1402		1.28779	2.93257	1.1747	2.11768	1.35003		1.55039	2.36838	3.36506	3.00808	0.996185
30.8913	39.4468	47.4009	47.5876	38.2238	31.795	34.7932	48.3002	58.9845	56.2286	44.3423	30.7386		1.28782	3.07939	1.17508	2.11779	1.35048		2.25621	4.04091	3.36521	3.00859	0.99621
26.4264	38.542	42.8802	49.7581	33.2289	30.2583	36.726	49.7441	59.271	59.2049	46.1432	31.6924		1.28807	1.98843	1.17568	2.11827	1.35048		2.08263	3.60677	3.36523	3.00882	0.996288
29.0063	44.9361	55.6413	35.9898	43.6866	31.2	37.9666	48.6722	54.8902	52.587	41.9588	30.7594		1.28809	3.87865	1.17597	2.11897	1.35088		1.69278	2.67598	3.36531	3.00884	0.99643
27.4723	41.7377	51.4842	54.365	38.6321	29.8325	37.422	47.7086	53.5057	53.9486	43.68	32.0683		1.28838	3.68731	1.17607	2.11945	1.35094		1.66108	2.59719	3.3656	3.00947	0.996532
33.1641	37.3479	43.707	48.5211	39.9799	32.0224	36.9797	51.7663	63.7479	58.9412	43.4208	30.9509		1.28841	2.62703	1.1762	2.1199	1.35097		2.30963	4.1811	3.36594	3.00973	0.99662
26.9934	35.3304	42.1172	50.1116	41.3222	30.4377	34.9532	48.2059	58.4854	53.9895	47.1677	31.1484		1.28842	2.78217	1.17838	2.12047	1.35124		2.23352	3.96597	3.36601	3.00986	0.996826
30.7562	37.8731	43.3415	48.6878	45.2071	31.1258	36.4498	50.0354	60.4218	57.7115	45.0852	30.7146		1.28851	2.39771	1.17868	2.12092	1.35134		2.21127	3.90183	3.3661	3.01002	0.997011
29.1263	33.3531	37.415	51.2235	41.8055	32.2654	35.0961	47.647	56.9044	52.9302	45.6092	30.7807		1.28856	1.88524	1.17876	2.12174	1.3514		2.11447	3.6741	3.36656	3.01011	0.997106
28.0483	39.4279	48.654	52.2034	39.1055	30.876	36.4513	46.4805	52.1389	52.4404	42.8085	31.5567		1.28861	3.72588	1.17885	2.12195	1.35154		1.5963	2.49693	3.36665	3.01016	0.997179
30.347	37.1173	41.0042	44.3242	39.8499	31.1277	35.9304	49.7293	60.5476	51.3384	45.6542	31.3205		1.28863	1.82679	1.17909	2.12204	1.35167		2.2231	3.966	3.36687	3.01036	0.99719
36.3347	39.9751	45.3353	50.3066	30.8745	31.8515	37.329	47.5568	53.2982	50.6077	44.8874	31.7811		1.2887	2.24566	1.18064	2.123	1.35182		1.60982	2.5135	3.36709	3.01048	0.997328
27.4029	44.079	53.8078	53.3234	40.9941	32.338	33.6361	47.3234	58.5708	54.7642	47.3417	30.715		1.2888	3.89126	1.18068	2.12321	1.35197		2.34013	4.2631	3.36739	3.0107	0.997375
30.5288	37.3796	43.7762	47.8635	39.5026	31.9128	33.9057	47.5746	58.7235	54.9457	45.4811	31.9713		1.28883	2.72248	1.18134	2.12346	1.35213		2.36022	4.28531	3.3677	3.01122	0.997506
29.8916	38.6767	44.2223	43.2788	44.6508	31.8449	35.5553	46.0229	52.4057	54.4568	45.9849	32.511		1.28896	2.4361	1.18147	2.12347	1.35268		1.73268	2.7892	3.36792	3.01134	0.997602
27.5839	35.8795	41.4631	50.8452	46.4413	32.2567	34.5886	47.6583	57.7669	54.9249	44.8189	31.9772		1.28897	2.41052	1.18191	2.12352	1.35291		2.21093	3.92093	3.36826	3.01157	0.997726
29.4345	39.4373	46.9028	44.7511	43.9261	31.6257	35.9493	48.616	57.8364	55.3975	44.4061	31.2736		1.28908	2.95045	1.18403	2.12383	1.35293		2.04156	3.52767	3.36837	3.01178	0.997936
27.5257	42.0007	49.0085	38.2614	36.062	32.3337	35.3046	46.7885	54.5484	56.014	46.0105	32.3502		1.28935	2.82782	1.18465	2.12506	1.35297		1.88924	3.16582	3.36841	3.0125	0.998028
28.0031	42.4822	49.3478	36.2048	29.0249	32.4148	36.5924	50.6752	61.7354	54.9447	45.0028	31.3115		1.28955	2.72536	1.18486	2.12585	1.35302		2.25042	4.01783	3.36887	3.01267	0.998074
33.9512	41.5674	51.2317	42.7563	42.7	31.1337	36.2873	45.6689	50.5615	55.1404	43.2236	31.1456		1.28977	3.30498	1.18551	2.12661	1.35305		1.50214	2.28553	3.36914	3.01282	0.998075
35.5297	40.0278	49.5694	35.0775	40.7398	30.4167	34.2511	47.2617	57.3691	57.2026	41.7521	29.8892		1.2898	3.55875	1.18558	2.12729	1.35306		2.31311	4.11008	3.36915	3.01285	0.998159
30.4557	41.235	45.8469	48.9088	40.5562	31.6574	36.78	50.9074	61.9846	55.1447	46.0966	30.4606		1.28989	2.03032	1.18713	2.12759	1.35315		2.22037	3.96135	3.36959	3.01344	0.998204
30.3136	35.3232	40.0203	22.0958	37.7616	30.823	37.1429	49.8375	58.8263	51.6749	45.3566	32.909		1.29	2.1194	1.18721	2.1287	1.3534		2.00957	3.4325	3.36966	3.01354	0.998424
29.2234	36.0677	44.7087	32.8679	37.3956	30.9033	35.1219	45.5883	52.055	61.042	44.5904	30.6889		1.29004	3.40047	1.18737	2.12875	1.35342		1.72411	2.78936	3.37003	3.01386	0.998451
28.2511	38.3927	45.13	45.586	36.3626	29.5615	34.1841	45.5916	53.4909	51.7771	42.4597	31.7565		1.29005	2.63793	1.18744	2.13004	1.35351		1.9722	3.33787	3.37012	3.01389	0.998526
32.5066	40.1784	46.6904	41.9562	36.6703	32.8263	34.8597	44.8229	50.7001	57.1481	42.9788	31.5434		1.29015	2.65267	1.18788	2.13013	1.35388		1.67735	2.66682	3.37018	3.01395	0.998578
31.86	43.6247	53.7231	47.9262	40.9383	31.6662	35.4246	45.977	52.494	53.0236	46.6867	30.1785		1.29019	3.60857	1.1887	2.13051	1.35401		1.78798	2.89221	3.37028	3.01403	0.998835
32.2733	40.5818	47.2745	47.8963	37.7022	31.2264	34.2556	43.339	48.2347	51.5246	41.9365	31.4038		1.29027	2.52931	1.18911	2.13079	1.35412		1.50706	2.31934	3.37033	3.01412	0.998888
30.8635	40.967	47.5279	51.7541	45.1422	29.5141	35.4645	47.4534	55.8566	54.1953	44.978	31.6414		1.29029	2.63589	1.18917	2.13106	1.35425		1.97724	3.36312	3.37047	3.01423	0.998944
27.7314	35.492	39.4743	46.0085	43.0049	30.7485	35.0097	47.9191	57.6984	56.0769	43.8503	31.4858		1.29043	1.88811	1.18981	2.13175	1.35462		2.19238	3.85316	3.37052	3.01438	0.998984
30.4819	35.9901	42.4359	55.3957	41.0385	32.7006	37.203	46.7104	51.592	56.0519	47.9825	30.5052		1.29047	2.71522	1.19083	2.13177	1.35473		1.53153	2.31792	3.37074	3.01473	0.998993
33.5073	41.11	50.8582	48.4552	44.4141	31.3596	35.7346	49.6327	60.643	56.5036	47.263	31.2866		1.29055	3.63851	1.19149	2.1318	1.35477		2.28481	4.09489	3.37093	3.01486	0.998995
28.4452	38.4714	42.6576	41.5519	41.3334	31.4832	33.9764	46.9858	57.1598	55.6597	43.8471	30.4609		1.29059	1.95682	1.1924	2.13195	1.35509		2.22333	3.96208	3.37115	3.01509	0.999015
26.7045	39.8588	48.537	35.8458	43.7813	32.4693	33.5054	46.8158	57.5445	53.6798	43.946	30.1242		1.29059	3.24501	1.19301	2.13238	1.3551		2.2952	4.14522	3.37127	3.01514	0.99915
31.6103	40.1446	44.9638	41.5092	41.572	30.7415	34.8931	48.1514	58.4539	59.869	44.3156	32.298		1.29066	2.1657	1.19373	2.13243	1.35517		2.21292	3.93248	3.37136	3.01517	0.999224
30.829	39.2496	44.2729	54.8109	39.7493	32.8596	34.6464	48.8239	60.5259	54.5645	43.6131	31.9349		1.29085	2.18936	1.19401	2.13293	1.35538		2.44616	4.46519	3.37153	3.01519	0.999442
28.0982	44.7111	54.9011	42.8753	44.1036	31.9983	37.2424	48.0427	54.5195	52.3218	42.2152	31.956		1.29093	3.56214	1.19404	2.13294	1.35546		1.67027	2.6719	3.37224	3.01566	0.99945
30.6342	37.231	43.3155	50.4733	40.5653	30.4818	35.6645	48.3295	57.6133	57.873	44.327	31.5311		1.29096	2.70884	1.1952	2.1338	1.35555		2.12056	3.67499	3.37227	3.01571	0.999581
34.4821	39.3564	43.6833	48.5726	41.8607	32.554	33.5477	43.3887	49.3656	53.6546	45.7613	31.1909		1.29101	1.94736	1.19625	2.13463	1.35576		1.69247	2.7204	3.37269	3.01573	0.999721
31.4858	33.4575	37.9775	46.6127	41.8444	32.024	37.9048	52.5087	63.9885	56.0258	42.5067	32.55		1.29107	1.9864	1.1983	2.13487	1.35579		2.32577	4.15401	3.3727	3.01582	0.99981
27.4792	39.6812	48.8188	48.3857	41.9388	31.1319	34.3143	48.3045	59.8185	53.1615	44.9509	33.044		1.29114	3.21517	1.19853	2.13513	1.3558		2.35551	4.29408	3.37303	3.01588	0.999857
28.8434	44.5349	54.9463	46.73	43.3136	31.5811	34.0858	44.1448	50.2944	55.7691	42.3832	32.4462		1.29115	3.70001	1.20086	2.1358	1.35583		1.70382	2.74545	3.37307	3.0159	0.999981
28.0588	42.9244	48.4515	47.4279	41.6563	31.0458	34.8652	44.8482	50.7494	53.5624	42.6932	31.2477		1.29116	2.24826	1.20093	2.13587	1.35594		1.66081	2.64257	3.37322	3.01627	1.00003
27.6949	35.3956	40.0813	49.1227	39.6965	30.4983	36.0468	47.159	54.2747	55.8014	42.7778	31.6803		1.2912	2.10428	1.20127	2.13593	1.35648		1.74873	2.86852	3.37352	3.01632	1.00025
30.7052	34.3166	38.5769	49.7714	41.9541	31.3759	36.7902	48.4046	56.0241	53.6936	45.8301	31.5406		1.29159	1.95017	1.20336	2.13616	1.35663		1.87633	3.10729	3.3736	3.01686	1.00045
31.0786	43.05	51.1954	56.6303	45.014	31.9866	33.8257	46.7784	56.9086	54.3914	48.1963	32.4514		1.29163	3.26607	1.20454	2.13696	1.35675		2.21836	3.95332	3.37377	3.01691	1.00058
26.9805	37.3502	44.2044	36.3216	38.2312	30.5244	36.0569	48.6085	57.6461	52.6878	45.4493	30.2526		1.29171	2.80716	1.20573	2.13706	1.35676		2.06634	3.55419	3.37377	3.01704	1.00069
29.1185	38.4826	43.9982	38.6216	35.0082	31.5545	34.2661	44.2857	50.3497	52.9991	45.9782	32.588		1.29176	2.33968	1.20671	2.1373	1.35687		1.6638	2.67074	3.37397	3.01706	1.00078
32.6929	43.1419	53.502	30.847	39.5021	32.2942	36.3252	46.7031	52.8224	53.7506	43.8125	32.1633		1.29177	3.87531	1.20748	2.13795	1.35731		1.73591	2.75948	3.37431	3.01715	1.00093
32.7413	39.2112	44.6444	46.3887	35.9728	31.4311	36.3306	50.2949	61.2505	48.7176	45.4379	32.6804		1.29181	2.29253	1.20817	2.13831	1.35748		2.25482	4.02383	3.3745	3.01719	1.00103
29.2911	32.9561	38.5261	46.3664	41.3798	31.799	36.2922	49.1158	58.4741	60.2862	45.1635	31.0186		1.29195	2.43673	1.2082	2.1386	1.35752		2.10115	3.6345	3.37469	3.01729	1.00116
26.1076	40.5035	49.0102	48.9958	45.1187	29.9963	34.556	43.5287	48.2349	50.6083	43.1799	32.6388		1.29205	3.2502	1.2105	2.13894	1.3577		1.50353	2.29215	3.37482	3.01745	1.00123
27.6782	36.7063	43.7659	43.8413	32.7859	32.4819	39.8983	51.6581	58.8379	58.7634	46.9455	31.0673		1.29211	2.89311	1.21084	2.13929	1.35771		1.77138	2.85287	3.37485	3.01747	1.00132
31.2313	37.3269	42.558	47.7554	30.5047	30.8876	34.4896	46.2163	54.4799	58.1557	44.6505	32.5326		1.29211	2.22295	1.2129	2.13977	1.35776		1.96184	3.34432	3.37507	3.01766	1.0015
29.649	39.0126	45.919	50.3494	44.1735	31.5289	35.8631	45.2076	50.1313	51.4165	45.4885	31.5963		1.29213	2.86311	1.21429	2.14236	1.35785		1.53011	2.33634	3.3751	3.01794	1.00175
28.6978	37.0744	41.0564	46.4755	42.9912	31.5829	35.9697	47.0812	54.2116	52.679	44.4792	31.4094		1.29218	1.93865	1.215	2.14304	1.35789		1.81381	2.97776	3.37555	3.01798	1.00176
30.8404	37.9625	42.6301	36.6319	42.3512	31.1035	35.1171	44.39	49.3613	54.6301	44.1771	30.8705		1.29232	2.01295	1.21575	2.14308	1.35805		1.55685	2.39148	3.37579	3.01809	1.00177
28.8496	38.6685	46.914	48.1954	37.644	31.2967	34.4289	44.2337	49.9941	58.6076	44.5114	31.7451		1.29238	3.19399	1.21605	2.14332	1.3581		1.6821	2.67033	3.37597	3.01816	1.00189
29.6792	37.4007	41.491	42.6579	38.4278	30.5452	36.9764	49.5745	58.4692	56.3611	45.1318	32.5073		1.29246	2.05512	1.2167	2.14385	1.35847		2.06382	3.52094	3.376	3.01818	1.00222
30.8676	37.5051	41.4645	52.8192	42.343	31.0433	36.732	51.2677	62.9473	52.621	45.5237	30.7657		1.29254	1.84244	1.21716	2.14426	1.35865		2.35098	4.24002	3.37608	3.01848	1.0023
31.3217	39.1692	45.5439	42.4224	41.3438	31.1741	35.7488	45.7199	51.4378	55.8308	45.2149	32.0692		1.29259	2.57917	1.21792	2.14438	1.35868		1.64414	2.58697	3.3761	3.01858	1.00237
28.1553	40.0584	47.7284	51.2575	42.9505	31.6865	37.8115	51.3472	61.3401	54.6662	42.8683	31.0047		1.29278	2.84737	1.21812	2.14477	1.35871		2.11149	3.67032	3.37619	3.01867	1.0024
33.2859	38.7326	46.004	48.617	44.417	30.2286	34.9081	47.8726	57.7539	56.7502	44.9622	31.9303		1.29279	2.80723	1.21842	2.14571	1.35876		2.15865	3.80394	3.37625	3.01874	1.00241
25.5612	40.3615	49.3257	48.9448	41.4387	31.3757	36.7829	46.8468	52.4866	56.6955	46.5261	31.5899		1.29298	3.05804	1.21868	2.14582	1.35891		1.66337	2.59551	3.37689	3.01874	1.00243
32.2096	36.546	40.7147	43.4126	35.303	31.6086	35.5464	48.0828	57.2161	57.5757	45.3186	31.0074		1.29301	1.98786	1.22012	2.14641	1.35893		2.07519	3.58705	3.37698	3.01882	1.00251
35.242	40.8151	49.9538	40.4228	35.7797	32.0789	34.9366	48.6842	59.6801	52.3353	45.3791	32.1235		1.29305	3.37154	1.22121	2.14794	1.35901		2.24003	4.03169	3.37723	3.01891	1.0028
28.3578	39.2768	44.0705	48.5301	27.4867	32.431	38.2617	48.3915	53.8404	52.07	46.3497	31.4154		1.29318	2.1788	1.22201	2.14933	1.35902		1.59045	2.44596	3.3774	3.019	1.00284
30.0105	36.7287	41.8556	49.1449	22.9582	31.1046	34.3023	47.911	58.8683	55.9068	45.1523	32.123		1.29331	2.27525	1.22213	2.14977	1.35906		2.35074	4.24349	3.37786	3.01906	1.00298
28.1361	43.0766	51.0617	50.6873	38.3775	31.0961	35.9868	50.5347	62.4267	54.1715	42.7751	29.6891		1.29342	3.11665	1.22285	2.15033	1.35931		2.38872	4.34135	3.37812	3.01909	1.00318
28.5501	42.1959	52.1186	49.9458	41.5252	31.6133	35.8167	45.3969	50.6176	54.4758	47.4128	31.5732		1.29349	3.66325	1.22297	2.15055	1.35938		1.54153	2.38157	3.37866	3.01945	1.0032
30.4892	46.2775	56.4088	40.9053	44.4778	32.1144	35.1815	45.2197	51.13	58.4018	46.4391	31.2601		1.29356	3.53253	1.22578	2.15072	1.35938		1.65141	2.62372	3.37869	3.01945	1.00327
28.1383	36.3844	42.611	57.7437	44.1202	30.6182	34.1089	44.6688	51.4606	57.509	45.1916	32.7969		1.29357	2.68877	1.22608	2.15133	1.35976		1.80706	2.9693	3.37889	3.01955	1.0033
28.4119	38.0459	43.2149	46.4186	43.8098	32.801	38.4125	48.3886	53.6225	54.5714	44.8478	30.8965		1.29358	2.2849	1.22627	2.15166	1.35977		1.54765	2.35962	3.37905	3.01956	1.00332
26.7394	38.4221	46.5481	37.8432	37.1622	31.3244	34.9741	49.3171	61.1763	54.9204	41.1744	31.5505		1.2936	3.07551	1.227	2.15172	1.3598		2.34476	4.28346	3.37921	3.01965	1.00334
28.5032	39.7379	46.0587	42.8478	36.3919	31.036	32.7319	43.1753	50.0996	56.4884	45.1481	30.6086		1.29361	2.44391	1.22713	2.15176	1.35986		1.83954	3.0592	3.37926	3.01975	1.00351
25.0823	36.7968	43.8598	45.6329	21.13	31.081	33.9511	47.3628	58.1239	57.0915	45.3227	31.4281		1.29364	2.64718	1.22797	2.15188	1.35996		2.28683	4.12172	3.37928	3.0199	1.00357
28.2104	40.2941	49.5925	46.1316	41.4112	30.5718	36.3226	51.0821	63.1968	54.4363	46.0043	31.1662		1.29369	3.45821	1.22827	2.15305	1.36021		2.43396	4.43177	3.37932	3.02042	1.00359
29.4123	37.533	43.2017	53.3643	35.8043	31.1586	33.9298	45.0776	52.6835	56.0768	43.8873	32.9554		1.29369	2.39379	1.22855	2.15317	1.36024		1.89245	3.18363	3.37938	3.02063	1.00367
29.536	41.8366	49.6745	46.4144	40.7375	31.9981	35.6491	45.0814	50.1511	55.8419	43.7354	31.1721		1.29371	2.8875	1.23514	2.15344	1.36031		1.54167	2.37029	3.3794	3.02068	1.00369
30.7797	37.9821	44.2962	47.6843	42.212	30.4675	34.5252	44.5388	50.5445	49.8834	44.7523	30.71		1.29376	2.46814	1.23547	2.15366	1.36037		1.71546	2.74433	3.37963	3.02091	1.00388
26.8374	41.0766	50.9511	46.1254	42.1752	31.5345	35.4933	44.8287	49.8081	55.8319	43.9221	30.0854		1.2938	3.41248	1.23615	2.15387	1.36046		1.54437	2.36812	3.37964	3.02098	1.00406
28.0765	37.8069	45.0833	52.8956	41.7941	31.3263	35.6123	48.8628	58.9782	53.8227	46.6138	32.748		1.29391	2.81285	1.23733	2.15542	1.36051		2.19828	3.87643	3.38062	3.02133	1.0041
29.2481	38.7725	46.9354	50.7283	41.6229	32.77	34.2921	45.5879	53.3138	54.2463	45.1354	31.4094		1.29393	2.99465	1.23787	2.15636	1.36055		1.90399	3.20624	3.38063	3.02136	1.00413
29.907	38.3017	45.942	45.466	43.6656	31.6657	36.7548	46.655	52.0975	54.9909	46.8086	31.1216		1.29407	2.95776	1.23848	2.15661	1.36071		1.58836	2.46153	3.38073	3.02172	1.00414
31.2027	37.1657	41.0862	47.0054	42.6124	32.0628	38.1591	52.767	64.189	51.1869	46.1503	31.7816		1.29415	1.92382	1.23972	2.15676	1.36075		2.29303	4.08597	3.38117	3.02186	1.00417
27.2805	36.5367	42.513	52.7947	41.5741	31.1716	35.6841	45.2472	50.4711	55.2796	47.6033	31.1409		1.2947	2.49488	1.23994	2.15702	1.36081		1.52917	2.3645	3.38144	3.02196	1.0042
28.3756	34.805	38.608	52.4149	43.4249	30.7949	34.6391	48.0909	58.7346	55.1637	42.4068	31.587		1.29476	1.87656	1.23998	2.15713	1.36087		2.24639	4.02383	3.38147	3.02198	1.00453
27.752	40.0543	44.9048	46.4879	44.7646	31.4453	37.1973	52.4008	64.938	56.2629	48.5032	30.4756		1.29493	2.2096	1.24268	2.15754	1.36103		2.49018	4.54365	3.3815	3.02214	1.00468
30.8248	41.9815	51.6225	39.084	45.9568	30.3655	37.3782	48.5433	55.4593	54.1444	44.1753	30.9461		1.29515	3.49035	1.24369	2.15854	1.3612		1.7824	2.88647	3.38156	3.02235	1.0047
29.3656	36.2526	40.6593	45.9521	41.4346	31.7065	35.4569	46.737	54.1944	57.8642	46.9851	32.491		1.29524	2.00605	1.24669	2.15878	1.3616		1.85206	3.07649	3.3818	3.02272	1.00476
28.8473	43.6689	50.4369	49.2954	42.7651	31.0995	34.2174	47.7173	58.5382	53.8396	44.0332	31.4859		1.29532	2.64161	1.24692	2.1588	1.36174		2.42363	4.36629	3.38181	3.02277	1.00479
32.4974	38.2733	45.6434	46.8243	41.2853	29.4154	38.7439	51.2784	59.7037	53.5955	45.4804	31.3643		1.29534	2.81432	1.247	2.15902	1.3618		1.89628	3.17087	3.3822	3.02301	1.00482
30.9189	35.9364	40.078	49.199	44.7128	30.7942	33.7134	45.2093	53.332	53.5318	45.7336	30.5192		1.29534	2.04859	1.24754	2.15923	1.36185		2.00866	3.42792	3.38248	3.02307	1.00499
28.7763	40.0574	47.6011	50.2044	43.14	31.1584	36.2154	50.7057	62.4532	55.3374	44.5238	30.5334		1.29535	2.84261	1.24887	2.15963	1.36186		2.34759	4.2508	3.38357	3.02345	1.00501
31.3242	36.6982	43.2844	49.6327	41.6644	31.8045	34.7837	49.0497	60.846	54.9735	43.9646	32.1756		1.29536	2.64618	1.24915	2.15977	1.36197		2.3823	4.35217	3.38369	3.02349	1.00502
29.2536	38.0375	43.1089	52.2352	43.8848	31.0816	35.3839	44.855	50.0208	52.1396	45.9985	31.5535		1.29553	2.22522	1.24951	2.15986	1.36206		1.61347	2.4935	3.38423	3.02351	1.00505
31.2839	34.8908	43.4145	44.1862	44.7872	30.9024	33.6079	46.4518	56.4803	53.9073	45.4392	31.4939		1.2956	3.29147	1.2509	2.16034	1.36207		2.23545	3.98089	3.38431	3.02353	1.00511
31.8895	42.6545	51.6237	42.4592	41.981	31.914	36.3099	47.3871	54.4037	51.3152	44.7253	31.18		1.29572	3.35631	1.25149	2.1604	1.36227		1.85123	3.02386	3.38434	3.02359	1.00511
26.0843	43.4472	50.0456	53.7675	39.4363	31.2129	34.6547	44.8137	50.9792	56.2909	43.6962	31.2058		1.29586	2.58878	1.25177	2.16128	1.3625		1.76311	2.83316	3.38437	3.02367	1.00518
30.8853	47.39	57.7996	47.3994	41.2949	31.1193	33.8116	43.2138	48.5862	54.8716	47.6217	32.0467		1.29591	3.56924	1.25183	2.16193	1.36258		1.60643	2.52434	3.38478	3.024	1.00535
25.5349	38.6053	43.3043	45.315	38.8936	30.9348	34.2944	45.6768	53.5184	54.0543	42.3502	30.5241		1.29594	2.02339	1.25369	2.16303	1.36283		1.95292	3.29832	3.38505	3.02404	1.00551
30.1804	39.1103	46.7831	46.9571	34.1803	30.6466	35.1451	47.4067	56.2534	50.7647	43.0428	31.6861		1.29595	3.06042	1.25399	2.16348	1.36291		2.04139	3.51425	3.38507	3.02423	1.00575
29.4756	40.5602	48.9145	47.4507	40.5303	31.3719	34.3966	46.4075	55.0801	52.5711	46.614	32.2278		1.296	3.32022	1.25546	2.16396	1.36293		1.98354	3.41578	3.38539	3.02457	1.00585
31.0406	35.4623	42.7295	47.9344	43.3544	31.8492	36.913	50.9108	61.7695	54.864	43.5729	32.2521		1.29607	2.99467	1.25715	2.16401	1.36353		2.17664	3.86517	3.38566	3.02467	1.00586
25.9293	37.886	43.4779	51.518	42.5	32.5539	37.5934	50.1793	58.9212	55.5443	44.0335	31.6811		1.2963	2.31182	1.25792	2.16473	1.3637		2.01009	3.40627	3.38573	3.02467	1.0059
29.9215	37.0123	44.981	46.8956	42.0703	32.125	34.2535	44.6896	51.2911	52.1768	46.8282	31.5874		1.29632	3.23655	1.25873	2.16519	1.36396		1.80158	2.9412	3.38655	3.02469	1.00592
29.8746	41.5033	49.9166	47.3384	42.8211	30.9389	35.5046	47.5168	55.9428	55.4703	46.618	30.8349		1.29655	3.03494	1.26145	2.16606	1.36416		2.02827	3.451	3.38671	3.02478	1.00596
29.9689	38.0408	45.1892	48.3142	42.4498	32.0134	37.5723	52.408	64.3074	49.8819	46.8384	32.7945		1.2966	2.79295	1.2615	2.16712	1.36429		2.34732	4.23008	3.38679	3.0249	1.00604
32.6723	37.2127	43.7241	33.386	45.6222	32.0132	36.9732	47.3479	53.3394	55.5533	44.4995	31.9041		1.29673	2.64207	1.26224	2.16862	1.36464		1.61644	2.54996	3.38729	3.02535	1.00617
27.7173	35.9724	41.1903	39.7131	39.2253	31.9864	33.6913	42.4542	47.0605	53.7878	42.763	31.1495		1.29681	2.24017	1.26254	2.16928	1.36478		1.49049	2.274	3.38729	3.02563	1.0062
28.8038	42.6354	50.5789	52.0862	39.9976	31.9689	34.5673	47.7225	57.9583	51.6138	44.9186	30.7797		1.29689	3.00211	1.26299	2.16956	1.36483		2.19805	3.90829	3.3873	3.02567	1.00621
28.2468	45.6315	54.7654	53.1168	44.1073	29.9938	38.8121	54.1583	66.4808	56.0417	43.0047	32.6957		1.29695	3.10713	1.2631	2.17221	1.36499		2.3407	4.22022	3.38813	3.02569	1.00625
29.7322	43.7485	51.702	40.3503	38.5496	32.23	34.0054	45.8875	54.4722	53.3079	45.4846	31.5953		1.29697	2.9198	1.26321	2.17244	1.36502		2.06044	3.54909	3.38822	3.02577	1.00666
32.5829	39.636	46.3132	55.5221	35.8109	30.7063	34.7385	48.8897	60.5282	53.7452	43.7095	33.5592		1.29705	2.685	1.26385	2.17415	1.36516		2.45282	4.47011	3.38843	3.02577	1.00674
25.5757	38.7735	47.7648	43.716	41.6429	30.4215	38.8591	51.3881	59.7816	53.5522	46.3256	31.9104		1.29707	3.47193	1.26422	2.17437	1.36519		1.90904	3.18794	3.38849	3.02581	1.00678
28.9794	43.1319	51.8206	44.6918	42.8258	32.573	34.6648	46.8966	55.8119	55.3001	43.5968	31.1808		1.29721	3.28313	1.26491	2.17448	1.36562		2.09808	3.6273	3.38872	3.02595	1.00684
27.5911	43.7644	53.1677	49.0338	43.079	30.751	34.5521	47.6583	57.8279	56.1995	45.5904	31.8051		1.29724	3.43508	1.26616	2.17454	1.36565		2.24522	3.98737	3.38893	3.02602	1.00687
30.2976	37.096	43.6106	35.2872	39.2577	32.0393	36.0893	47.9016	55.9314	54.5642	43.6321	32.2067		1.29726	2.50234	1.26633	2.17666	1.36568		1.90555	3.20091	3.38908	3.02609	1.0072
32.1592	38.7072	46.7739	30.3742	41.5654	31.4638	34.4466	46.9517	56.2978	53.5606	42.5764	32.1418		1.29738	3.10263	1.26637	2.17771	1.36575		2.13326	3.72762	3.38912	3.02623	1.00727
28.3676	35.2452	40.2655	30.2318	42.605	30.8635	35.8266	47.5717	55.568	59.5656	43.3934	30.9562		1.29743	2.38625	1.26646	2.17775	1.36575		1.86229	3.13019	3.38922	3.02634	1.00729
27.193	36.9294	41.7672	44.6352	40.9665	31.4601	35.9706	46.8855	53.7605	59.1515	44.6888	32.1543		1.29754	2.16374	1.26661	2.17786	1.36595		1.79341	2.92303	3.38923	3.0264	1.00776
29.8831	41.4878	49.3552	50.3007	44.3134	31.4056	36.4115	49.349	58.8371	54.9761	45.9335	30.8471		1.29756	2.95511	1.26747	2.17844	1.36605		2.12746	3.68772	3.38949	3.02642	1.00778
31.0747	32.3852	38.99	47.9675	40.3942	31.5674	35.4114	47.5523	56.1739	56.4259	45.9554	32.8225		1.29758	2.75442	1.26769	2.17875	1.36618		1.94797	3.33127	3.38958	3.02653	1.00779
28.1197	40.5993	49.2156	46.959	44.136	30.2036	35.8143	46.3184	52.6968	55.133	43.4523	31.893		1.29766	3.06938	1.26817	2.17877	1.36629		1.70755	2.74443	3.38965	3.02656	1.00786
32.2912	32.4126	35.7827	42.5509	45.2967	32.0967	37.6407	52.744	65.0164	54.2662	44.924	31.5955		1.2979	1.75878	1.26841	2.17898	1.36631		2.3959	4.34272	3.38975	3.02748	1.0079
30.2924	38.1365	44.3898	46.0053	43.8268	30.8885	35.6264	45.584	51.3081	53.8135	47.2682	30.2922		1.29795	2.56271	1.26926	2.17933	1.36638		1.6056	2.52859	3.38982	3.02762	1.008
29.2135	42.3147	50.9641	46.4598	45.8784	31.4263	36.1554	49.4273	59.4421	56.2975	42.8818	31.0829		1.29797	3.11757	1.26972	2.17958	1.36645		2.23234	3.91685	3.39092	3.02774	1.00804
29.9441	37.6141	44.5735	51.8514	32.3651	31.1679	35.5081	50.019	61.9835	52.684	45.8464	31.0145		1.29808	2.78265	1.2709	2.18031	1.36649		2.43026	4.43407	3.39105	3.02812	1.00806
29.1819	38.4333	44.5857	43.9256	41.4602	32.7436	34.7299	45.2966	51.9711	55.3347	42.5969	30.8071		1.29821	2.38524	1.27339	2.1806	1.36654		1.72687	2.81765	3.39136	3.02828	1.00807
31.0855	42.1545	50.8758	42.4934	40.9673	30.9601	35.8318	49.6377	60.4907	52.6334	45.8102	32.5679		1.29828	3.17241	1.27434	2.18095	1.36667		2.28725	4.08529	3.39141	3.02849	1.00815
29.3556	43.3711	48.7379	35.3368	40.4459	32.3482	35.1035	45.6956	52.3279	54.0286	46.0049	31.7825		1.2983	2.34176	1.27518	2.18131	1.3668		1.84358	2.99793	3.39146	3.02878	1.00815
28.8688	38.2722	42.7046	48.2331	40.6339	29.9687	33.3894	47.1197	58.4966	54.3651	46.7836	31.6728		1.29844	1.90333	1.27539	2.1821	1.367		2.32593	4.25319	3.39161	3.02887	1.00835
30.7947	34.474	38.302	49.6423	41.1813	32.5039	37.7548	52.0219	63.0572	57.8891	44.0456	33.2901		1.29868	1.88266	1.27548	2.18281	1.36701		2.31065	4.09789	3.39184	3.02901	1.00838
33.2855	36.5556	40.896	41.3982	41.5222	30.7536	35.0254	48.0886	58.0813	55.9026	44.6492	31.9657		1.29871	1.86726	1.2786	2.18289	1.36738		2.2149	3.90917	3.39224	3.02948	1.00853
30.4205	36.2832	41.4022	47.3515	36.0354	32.0775	35.5061	45.3452	50.9441	57.8906	47.9259	31.9286		1.29872	2.26844	1.27867	2.18294	1.3674		1.6176	2.5381	3.39226	3.02957	1.00863
30.1756	38.1058	43.739	40.6086	42.2969	30.8453	38.5759	49.6168	56.1404	53.4485	43.1789	30.7407		1.2989	2.28587	1.27897	2.18318	1.36749		1.7537	2.78989	3.39262	3.0297	1.00867
32.8222	37.4764	46.1531	42.324	42.5873	31.9295	36.8668	50.8393	61.6734	55.4087	44.8151	32.1851		1.29893	3.30794	1.27955	2.18337	1.3677		2.23513	3.96822	3.39269	3.02976	1.00876
27.9963	39.1507	46.0485	46.8476	18.9862	32.3736	35.5412	45.4203	51.0625	55.5429	43.0795	31.5405		1.29913	2.80712	1.27971	2.18479	1.36775		1.68528	2.64779	3.39277	3.02992	1.00891
26.4834	38.1064	42.5061	52.6802	43.3659	31.6958	37.0556	49.514	58.2016	52.1031	43.9663	31.3138		1.29919	1.97598	1.28045	2.18535	1.36798		1.99676	3.38918	3.39293	3.03002	1.0091
32.42	34.1012	38.9682	48.0504	44.4168	32.3843	35.4276	47.9047	56.9835	56.4417	46.2709	31.1986		1.2992	2.20823	1.28057	2.18575	1.36803		2.13657	3.69121	3.3934	3.03007	1.00931
27.9444	43.8494	50.6071	40.1839	40.647	32.4333	35.9828	47.4953	55.1493	56.9721	44.2541	31.3334		1.29931	2.70531	1.28179	2.18582	1.36825		1.93252	3.21734	3.39395	3.03008	1.00945
27.6029	38.7444	44.0513	52.1676	43.5416	31.6452	33.7081	45.1002	53.0833	52.9156	43.5195	30.5742		1.29945	2.30406	1.2825	2.18625	1.36833		1.93157	3.28513	3.39442	3.03039	1.00948
30.6066	41.1469	49.2862	50.1868	46.1657	31.8715	34.0475	43.219	48.2613	53.8887	46.3493	31.3488		1.29948	3.21549	1.2836	2.18692	1.36838		1.57939	2.4477	3.39466	3.03051	1.00959
29.2395	44.2703	54.148	45.7636	44.3478	32.4484	38.9663	49.2518	54.7632	60.1359	43.7275	31.3528		1.29951	3.78587	1.28405	2.1872	1.36867		1.55039	2.38115	3.3947	3.03067	1.0097
30.8246	40.6605	50.227	44.9464	42.4734	31.1381	38.8073	51.5546	60.2498	54.8862	42.4993	32.1635		1.29956	3.76393	1.28413	2.18742	1.36871		1.95501	3.28857	3.39479	3.03073	1.00972
29.8938	42.5812	50.6226	48.336	41.9656	31.459	32.9083	45.2509	54.7373	50.9996	47.1919	31.2691		1.29959	3.0832	1.28433	2.18743	1.36897		2.15568	3.8125	3.39487	3.03075	1.00983
33.699	36.1475	42.4509	51.454	37.2998	32.3135	36.8746	47.7143	54.3129	53.363	45.458	30.8011		1.29961	2.72188	1.28444	2.18753	1.36906		1.78749	2.87563	3.39512	3.0309	1.00985
25.499	42.6978	51.5931	41.4954	42.8036	31.5554	36.352	45.7422	50.6338	55.6109	46.1972	32.2783		1.29975	3.49897	1.28517	2.1884	1.36915		1.5597	2.37218	3.39516	3.03096	1.00989
31.8034	35.9408	41.6658	48.1416	43.8598	31.9105	37.0389	50.318	60.1344	57.4417	48.5289	31.481		1.29984	2.40872	1.28554	2.18925	1.36918		2.08958	3.63427	3.39541	3.03101	1.00992
28.3004	38.0717	44.5864	40.8421	43.3921	31.4258	33.519	43.5167	49.6999	56.4525	43.3141	32.4167		1.29987	2.49729	1.28645	2.18991	1.36929		1.71641	2.77793	3.39568	3.03101	1.01004
30.5018	41.6079	49.66	47.3119	44.549	32.8348	34.2612	47.3399	57.5422	55.0929	43.7001	33.8527		1.30006	3.00035	1.28664	2.18994	1.36931		2.22612	3.96265	3.39584	3.03116	1.01009
30.3265	36.7819	43.1817	42.2356	40.7671	30.3579	33.1073	45.3765	54.7108	56.8045	46.808	31.422		1.30007	2.6658	1.28744	2.19038	1.3694		2.10164	3.70054	3.39587	3.03116	1.01027
29.5009	36.9881	41.7621	46.3335	40.4658	32.3612	36.985	47.29	53.1922	54.4029	43.6519	32.9347		1.30008	2.31584	1.2882	2.19191	1.36941		1.61393	2.5383	3.39608	3.03134	1.01031
29.2112	47.2631	57.6918	51.2095	44.7638	31.7514	34.8642	46.1179	53.6651	52.1029	43.3741	31.6549		1.30015	3.54648	1.28823	2.1922	1.36984		1.87785	3.13724	3.39635	3.03135	1.01056
30.5342	40.2169	46.2578	50.9339	43.3817	29.5561	34.7156	44.5276	50.2421	53.458	46.475	32.6036		1.3002	2.75225	1.28885	2.19259	1.37004		1.61227	2.55126	3.39704	3.03136	1.01067
30.8138	38.4541	42.5493	51.8359	45.7805	31.4373	34.2782	43.9932	49.6694	53.8138	44.5581	32.8488		1.30024	2.03669	1.28895	2.19296	1.37005		1.64876	2.61206	3.39714	3.03167	1.01069
29.022	35.0975	40.0068	49.3611	39.8834	32.5513	34.5915	45.3053	52.199	57.0148	43.7198	31.9995		1.3004	2.19747	1.28903	2.19321	1.37007		1.81051	2.97547	3.39734	3.03184	1.01092
28.9742	42.4994	48.2138	39.7875	39.6327	32.0066	35.3142	47.0482	55.1405	54.3313	46.1608	31.1635		1.30049	2.19967	1.28968	2.19411	1.37015		1.94948	3.29393	3.39743	3.03191	1.01142
34.9458	38.756	43.7755	50.6714	39.6238	30.6667	33.6018	46.1026	55.6446	55.2246	45.2757	30.2819		1.30052	2.07862	1.28987	2.19416	1.37028		2.20228	3.88329	3.39781	3.03202	1.01176
32.9065	40.2683	44.5419	38.3684	34.0571	32.5296	34.4257	44.7774	51.2354	57.3944	44.2882	30.6942		1.30063	1.89343	1.29097	2.19461	1.37036		1.71124	2.7788	3.39784	3.03205	1.012
28.7273	35.2597	39.4728	45.0609	34.5303	31.9511	35.6036	46.1388	52.5984	53.2602	42.8415	32.2703		1.3007	2.05538	1.29242	2.19479	1.37047		1.74232	2.81061	3.39864	3.03228	1.01204
29.9637	40.1984	48.8888	50.0622	39.1045	29.9673	36.6527	51.1453	62.7826	52.2392	44.9178	30.2794		1.30079	2.99738	1.29414	2.19537	1.37057		2.34953	4.23616	3.39891	3.03235	1.01208
27.6313	41.1422	47.5938	-3.92669	41.3711	30.4074	36.1539	47.6948	55.3505	55.1062	44.6621	31.0595		1.30085	2.62978	1.29603	2.19625	1.37073		1.84631	3.07105	3.39919	3.03242	1.01219
31.8681	40.7977	50.1155	50.2406	34.5878	31.6957	34.8454	44.5359	50.0736	56.0931	46.7792	31.2857		1.30094	3.37909	1.29644	2.19646	1.3708		1.6439	2.58332	3.39944	3.03246	1.01223
30.6261	40.5651	49.2906	53.0239	43.0218	30.3	35.5098	46.0436	52.5199	56.6784	44.1268	31.7566		1.30103	3.22741	1.29674	2.19657	1.37082		1.73782	2.80626	3.39991	3.03254	1.0123
31.0707	37.019	43.2164	50.2149	42.2515	30.9525	38.5288	51.3379	60.1762	55.3631	42.9344	31.1707		1.30127	2.65506	1.29741	2.19681	1.37104		2.01998	3.41377	3.40019	3.03266	1.01234
29.416	39.7582	46.2853	48.5427	33.2514	32.5336	35.4813	49.1664	59.9338	56.3214	41.8239	32.2299		1.3013	2.59504	1.2987	2.19688	1.37108		2.22907	3.98289	3.40024	3.03281	1.01234
29.6612	41.1029	50.9138	14.2398	38.5069	30.1298	35.3135	46.0869	52.9115	52.9828	42.7121	30.6972		1.30132	3.57448	1.29878	2.1969	1.3711		1.75504	2.86678	3.40025	3.03329	1.0124
30.4609	38.4282	43.0785	46.6278	38.224	30.2241	36.7601	46.4944	51.7319	53.8346	45.4319	30.5874		1.3015	2.01786	1.29891	2.19717	1.37125		1.58526	2.43821	3.4006	3.03339	1.01241
27.9215	36.6208	41.6112	49.7611	42.4874	30.5911	37.3501	46.905	51.8179	54.177	44.5083	31.4106		1.30171	2.27628	1.29933	2.19952	1.37125		1.51825	2.29892	3.40087	3.03342	1.01257
28.8376	37.5599	41.9028	44.5767	38.3101	32.3115	34.3464	44.6343	51.0259	50.4347	42.7691	31.8748		1.30179	2.02026	1.29959	2.19958	1.37136		1.73702	2.81619	3.40208	3.03359	1.01258
29.918	40.9763	45.5229	51.2629	45.8365	31.7309	36.3543	51.0663	63.1025	57.0671	43.827	31.3763		1.30187	1.96668	1.30002	2.19996	1.37144		2.46017	4.47289	3.40225	3.03372	1.01266
29.3818	36.7346	42.6981	40.0781	40.0703	31.638	34.9315	47.092	55.8484	55.2224	47.975	31.7717		1.30215	2.56645	1.30024	2.20002	1.37163		2.02722	3.48697	3.40253	3.03376	1.01269
30.6824	39.9854	47.2962	50.8766	40.4776	31.9382	35.7783	44.9	49.5687	56.4754	43.244	31.0156		1.30228	2.63504	1.30025	2.20031	1.37179		1.45526	2.20009	3.40272	3.03381	1.01274
27.8628	32.6799	36.9951	45.1715	40.1989	31.0774	35.1415	44.5239	49.6251	56.8844	45.2218	30.4304		1.30243	1.98181	1.30129	2.20095	1.37181		1.55512	2.40062	3.40278	3.03399	1.0128
27.2922	39.1247	44.4099	38.0023	39.7064	32.736	37.0874	51.2403	62.2773	55.8158	44.8154	32.2097		1.30246	2.40162	1.3013	2.20152	1.37191		2.25592	4.0152	3.4028	3.03417	1.01309
30.6733	37.5309	43.125	45.2377	43.7995	30.7838	37.3075	52.2054	64.2642	51.7588	44.9062	31.3006		1.30268	2.57531	1.3046	2.20174	1.37193		2.32948	4.21503	3.40302	3.03422	1.01309
35.2072	42.5775	47.0668	41.5043	30.1805	31.1853	35.0853	46.4967	54.2068	60.0345	45.6678	32.0422		1.30283	1.93813	1.30504	2.20201	1.37216		1.87677	3.14479	3.40309	3.03503	1.01315
30.6262	38.4788	46.5149	45.6451	35.0678	30.3641	35.6286	49.7242	61.048	56.3288	46.3144	31.9549		1.30299	3.05767	1.30516	2.20204	1.37218		2.25351	4.06387	3.4039	3.03511	1.01329
28.2779	41.0734	48.7738	41.6077	44.0838	31.8839	37.5478	48.9836	56.215	51.394	44.97	32.4825		1.30305	2.96425	1.30634	2.20247	1.37231		1.77999	2.90555	3.40394	3.03528	1.01338
28.8708	46.3871	56.9312	40.338	41.0591	31.9186	35.8998	50.5473	62.6092	55.4495	45.3914	30.9463		1.3033	3.58462	1.307	2.20281	1.37232		2.37879	4.33767	3.40409	3.03531	1.01358
26.7561	38.2332	44.2806	38.8401	26.3557	32.026	34.9112	49.1865	60.9623	57.5829	44.2375	30.8878		1.30331	2.50843	1.30842	2.20319	1.37241		2.42955	4.4337	3.40449	3.03535	1.01359
32.7341	39.1789	45.5858	42.4061	44.2289	30.9588	35.4322	49.3261	60.4074	55.7544	48.6845	31.4481		1.30343	2.52422	1.30947	2.20324	1.37246		2.31768	4.16618	3.40468	3.03548	1.01364
30.9123	49.5687	61.3953	53.0508	44.6709	31.1238	37.2392	48.7953	56.2457	57.3567	44.2417	31.993		1.3035	3.70593	1.3106	2.20334	1.37247		1.83073	3.01104	3.40483	3.03552	1.01365
33.2503	35.961	41.3803	51.5652	42.1354	31.1585	36.3653	47.9755	55.6784	53.3342	44.5454	31.8949		1.30355	2.29619	1.31259	2.20379	1.3725		1.87352	3.11652	3.40486	3.03574	1.01386
29.9572	41.7639	46.5429	46.0897	45.4222	31.3668	34.2775	43.2742	48.0599	54.0314	44.6329	31.9156		1.30355	2.13202	1.31278	2.20423	1.37251		1.51036	2.31379	3.40492	3.03579	1.01404
29.5461	40.4146	47.7625	50.4275	41.6455	32.2321	37.683	52.3308	63.9299	51.8033	44.3245	31.5613		1.30356	2.80273	1.31459	2.20436	1.37291		2.39666	4.29448	3.40502	3.03581	1.01406
30.2683	35.5852	40.4077	42.7209	37.5765	31.1427	34.9496	49.132	60.7606	54.6135	46.6606	32.1729		1.3036	2.09544	1.3146	2.20509	1.37294		2.35392	4.28396	3.40551	3.03599	1.01407
29.6286	36.96	43.1123	50.6188	37.2978	31.7104	37.219	47.5158	53.3638	52.7032	43.6419	30.4677		1.3036	2.58837	1.31707	2.20584	1.37299		1.60987	2.52417	3.40574	3.03623	1.01418
30.0515	38.1421	45.4057	49.0301	44.7388	31.7938	34.1583	43.7307	49.2505	54.72	44.694	31.8957		1.30361	2.73399	1.31713	2.20619	1.37311		1.62086	2.55551	3.40586	3.03628	1.01418
29.9338	36.6851	45.6169	49.2573	39.6065	31.982	33.3468	42.0892	46.7327	57.4245	44.6217	32.2594		1.30369	3.24153	1.31749	2.20634	1.37318		1.53075	2.34382	3.40673	3.03653	1.01435
31.8211	36.0805	39.8271	43.0787	43.3098	32.188	34.4114	48.4157	59.9246	49.6594	46.7222	31.1769		1.30392	1.84462	1.31783	2.20658	1.37379		2.39864	4.36985	3.40718	3.03655	1.01449
31.229	50.1031	61.2189	51.8124	42.6121	31.4366	35.7832	47.5338	55.5469	56.7527	44.6529	30.837		1.30397	3.59237	1.3185	2.20665	1.3739		1.9359	3.25605	3.40734	3.03664	1.01455
29.2424	41.1885	48.2184	42.9334	31.7011	32.1341	35.9669	50.6752	62.809	56.9741	47.0276	32.4479		1.30408	2.84233	1.31946	2.20679	1.37405		2.41665	4.41031	3.40744	3.03666	1.01463
29.8538	45.4107	53.1013	45.5139	38.9952	32.715	37.0416	52.0909	64.442	53.0645	45.5924	30.7769		1.30412	2.91729	1.32029	2.20699	1.37414		2.42683	4.41854	3.40745	3.03708	1.01475
30.401	34.135	38.261	48.3435	41.9314	30.6341	34.4779	47.2139	56.8766	57.3366	46.0397	30.8419		1.30413	1.97453	1.32189	2.20722	1.37431		2.20045	3.8699	3.40766	3.03727	1.01481
31.5675	39.103	46.6825	50.1669	36.9452	31.1375	34.6865	44.8197	50.9461	54.208	45.2911	30.6838		1.3042	3.18247	1.32199	2.20725	1.37464		1.70014	2.72803	3.40769	3.03756	1.01514
31.8834	36.5717	40.7069	45.2285	35.1228	30.8904	35.2818	45.646	51.9505	52.4766	42.4541	32.4879		1.30421	1.86161	1.32535	2.20825	1.37491		1.71065	2.75123	3.40772	3.03757	1.01517
28.5419	45.4086	54.294	44.9117	33.6377	32.3066	33.824	45.525	53.9025	56.4134	46.0185	30.6647		1.30435	3.32706	1.32539	2.20846	1.37491		1.93977	3.32857	3.40781	3.03794	1.01528
29.0586	40.7228	48.7115	34.3042	43.8563	31.9566	33.3327	43.4002	49.7104	52.1458	46.7275	31.0586		1.30439	3.06243	1.32675	2.20877	1.37496		1.78274	2.90015	3.40782	3.03801	1.01534
31.5005	43.2729	48.4075	45.0315	43.9654	32.284	36.9649	50.7024	61.179	56.7124	43.5643	31.1632		1.30487	2.25746	1.32765	2.20886	1.37501		2.23595	3.94113	3.40816	3.03808	1.01544
31.8961	39.5922	47.6077	52.4055	40.1728	31.6217	35.9328	47.2492	54.6552	56.5222	46.1154	30.5992		1.30495	2.97427	1.32965	2.20932	1.37528		1.82888	3.02579	3.40829	3.03826	1.01547
27.7506	34.6115	39.0489	41.07	31.3518	31.4167	38.1336	49.2545	55.9653	51.4267	42.7622	31.4009		1.30497	2.09273	1.32986	2.21025	1.37551		1.68051	2.69459	3.40851	3.03828	1.01553
28.3975	34.5837	40.1355	36.486	42.1967	31.1798	36.8594	49.9398	59.5223	51.9493	43.2976	30.4648		1.30499	2.38278	1.3299	2.2109	1.37551		2.04438	3.54207	3.40857	3.03842	1.01562
31.5855	33.884	38.9068	51.0112	40.0208	30.8497	39.5634	54.8155	66.811	49.7819	43.3139	31.5479		1.30514	2.2636	1.33075	2.21138	1.37563		2.26323	4.0432	3.40857	3.03842	1.01563
31.2944	40.3325	48.263	41.8015	44.3587	31.1303	36.4028	49.2679	58.6581	54.2162	44.178	32.1882		1.30522	3.05958	1.33108	2.21194	1.37579		2.10376	3.63928	3.40873	3.0387	1.01564
32.5067	39.057	43.5308	46.6746	43.4475	31.2751	34.8336	44.2209	49.3845	58.5635	47.0335	32.2418		1.30529	1.93986	1.33156	2.21245	1.37595		1.59241	2.46833	3.40878	3.03874	1.01569
32.2846	40.0469	44.5659	51.9087	44.6812	31.8218	36.5813	47.8691	55.1042	54.5189	45.9729	31.0542		1.30536	2.12383	1.33168	2.21252	1.37623		1.81357	2.97601	3.40886	3.0389	1.01569
30.2387	43.3535	48.3559	43.1746	44.7263	31.0447	33.7862	43.7272	49.7849	52.0336	44.5289	31.1465		1.30548	2.24796	1.33193	2.21305	1.37683		1.76367	2.83839	3.40899	3.0389	1.01584
29.5046	42.3827	51.6923	51.2947	42.5768	32.8147	38.5397	51.579	60.7255	55.981	48.5766	31.4411		1.30554	3.2183	1.33275	2.21374	1.37707		1.954	3.32466	3.40899	3.03898	1.01586
27.8196	37.6353	42.749	45.2625	41.9981	31.283	35.2556	45.9575	52.7009	54.5941	44.0327	32.198		1.30555	2.25738	1.33326	2.21468	1.37709		1.76684	2.88016	3.40911	3.03902	1.01588
31.4659	43.0207	52.2207	45.2511	41.3129	30.9354	35.8858	48.728	58.2061	51.0037	43.2801	31.3322		1.30558	3.47786	1.33378	2.21529	1.37732		2.11149	3.66986	3.40917	3.03903	1.01612
30.7071	35.4692	39.8912	45.5409	16.6455	30.0575	34.583	46.8199	55.7612	50.713	43.0392	32.6094		1.30559	1.99836	1.33383	2.21538	1.37746		2.01477	3.48693	3.40959	3.03916	1.01622
29.4058	43.1776	51.7891	46.2511	39.6878	31.3696	33.3189	45.6461	55.0112	53.4033	46.2223	32.7549		1.30585	3.31372	1.33416	2.21612	1.37748		2.19186	3.85705	3.40963	3.03929	1.01633
30.9244	41.3034	50.9241	38.3579	39.0785	31.696	35.2733	44.6194	49.6519	52.8384	44.018	31.6719		1.30587	3.64372	1.33479	2.21643	1.37762		1.59877	2.45963	3.40982	3.03931	1.01633
28.7888	45.3765	56.4513	46.8825	35.471	30.8331	35.8318	46.8075	53.7894	56.0216	44.9495	31.4193		1.30596	3.86227	1.33659	2.21697	1.37767		1.82399	2.98427	3.40997	3.03934	1.01642
30.4668	42.6238	48.4653	54.1372	45.691	31.5885	37.2325	49.2316	57.2664	54.3769	46.0654	31.6357		1.30613	2.49688	1.33715	2.21851	1.37775		1.94928	3.25455	3.41009	3.03951	1.01655
27.4283	39.4804	43.7839	39.1089	41.8114	32.4073	34.6576	47.8313	58.0711	55.1603	44.4669	31.72		1.30614	2.0431	1.33729	2.21894	1.37779		2.23411	3.97066	3.41043	3.03953	1.01665
30.7316	43.5874	50.3994	49.1035	40.9	30.4855	34.2145	43.2388	48.0697	54.9666	43.6022	33.1293		1.30617	2.47387	1.3373	2.21945	1.3779		1.55724	2.39086	3.41067	3.03971	1.01672
29.3756	36.6646	43.1202	50.2396	37.0947	31.0354	32.921	42.2394	47.6757	59.1222	47.1571	33.2877		1.30635	2.54779	1.33733	2.21953	1.37793		1.6443	2.60357	3.4107	3.03975	1.01679
27.4451	39.8083	46.4442	50.64	41.9639	31.7517	35.914	49.4271	59.8414	55.9042	47.1267	30.7556		1.30636	2.61225	1.33745	2.21977	1.37799		2.2425	3.97073	3.41101	3.03988	1.0168
25.6414	38.9051	46.7047	38.0004	41.0189	31.6362	34.041	47.095	57.3166	56.1831	43.1554	32.5757		1.30642	2.88926	1.33821	2.22051	1.37814		2.23095	3.97785	3.4112	3.03991	1.01699
29.4743	35.6925	39.7684	52.4677	45.0576	32.1772	36.2268	46.1119	51.6335	52.4731	47.2818	31.0836		1.30646	2.01306	1.33865	2.22077	1.37824		1.61304	2.51403	3.41125	3.03997	1.01708
28.0409	36.0799	41.6369	17.7744	38.4286	30.3668	35.1143	48.2691	58.37	56.325	44.5235	31.5		1.30651	2.35438	1.33991	2.22095	1.37829		2.17256	3.84073	3.41133	3.0402	1.01711
28.9728	46.1488	57.4349	42.038	40.3115	31.4802	33.6541	46.0154	55.348	53.4463	46.6557	31.8237		1.30661	3.72144	1.34059	2.22237	1.37833		2.11166	3.70594	3.41134	3.04024	1.01712
27.7266	40.1823	46.5328	47.0325	38.287	30.8593	37.4659	50.9231	60.8873	53.1256	43.8004	30.9092		1.30663	2.75044	1.34096	2.22242	1.37839		2.04619	3.56128	3.41174	3.04028	1.01725
30.8358	40.3167	45.4402	36.5062	42.7394	31.825	34.7831	46.1417	53.8458	55.8681	46.318	31.4004		1.30677	2.3786	1.34103	2.22266	1.37852		1.89205	3.17537	3.4123	3.04031	1.01736
31.6083	40.8871	47.927	39.4493	43.4062	30.4039	38.1995	52.9586	64.5877	56.0471	44.1884	31.6248		1.30687	2.68054	1.34221	2.2235	1.37873		2.26617	4.05173	3.41244	3.04045	1.01746
28.3853	44.4136	52.458	53.8099	41.6557	30.5207	36.7121	48.692	56.812	56.1235	43.1136	32.0119		1.3069	2.8653	1.34254	2.2236	1.37882		1.88181	3.1573	3.41248	3.04046	1.01746
32.2645	41.2618	49.109	45.1814	41.7278	31.4814	36.3925	48.1592	56.0634	53.9446	46.4775	32.5087		1.30695	2.82531	1.34313	2.22428	1.37885		1.92799	3.22313	3.4125	3.04063	1.01752
30.8059	40.7098	47.3584	51.2632	34.9475	31.6457	38.2057	48.9058	55.0716	56.1203	47.179	30.4476		1.30706	2.61145	1.34447	2.22439	1.37896		1.65125	2.60276	3.4125	3.04069	1.01768
27.4769	41.4206	48.7064	43.4634	45.3608	31.3893	36.2836	50.4419	61.6888	54.0819	44.9553	31.4253		1.30706	2.83727	1.34747	2.22495	1.37915		2.33083	4.18238	3.41271	3.0408	1.01777
30.4437	40.215	44.8796	51.4205	36.7602	30.9399	34.9552	45.3962	51.8636	56.7847	45.2007	31.551		1.30707	2.24352	1.34796	2.2255	1.37926		1.79989	2.91477	3.4128	3.04084	1.01779
30.766	37.1774	42.4594	44.687	42.3872	31.5494	33.8756	47.1228	57.6647	54.5462	43.5061	33.439		1.30718	2.29125	1.34797	2.22581	1.37946		2.29139	4.11483	3.41302	3.0409	1.01786
28.3637	38.4373	43.8727	49.6906	38.3173	32.1016	33.7296	42.8943	47.9868	55.6951	44.2667	31.0855		1.3072	2.36357	1.34803	2.22668	1.37947		1.5696	2.44177	3.41307	3.04142	1.01789
27.4687	39.4588	47.6242	42.8239	43.4435	32.3812	33.0035	46.2484	57.012	56.7046	46.022	31.2316		1.30728	3.00912	1.34967	2.22687	1.3795		2.28923	4.14961	3.41328	3.0415	1.01791
27.766	40.9504	46.0309	48.7818	42.4712	31.0952	35.8883	49.9685	61.2032	52.6783	45.6176	32.7752		1.30733	2.30161	1.34967	2.22697	1.37961		2.39106	4.2989	3.41332	3.04166	1.01807
27.4226	37.1049	44.2254	48.0121	36.2613	31.9276	33.6365	44.5965	52.0146	55.7831	43.2884	32.5917		1.30738	2.96575	1.35022	2.227	1.37967		1.86967	3.13513	3.41371	3.04234	1.01808
29.1417	37.3423	42.8885	46.8864	44.2425	31.5977	33.0334	43.1973	49.6928	60.7022	43.7942	31.5056		1.30746	2.482	1.35077	2.22742	1.37987		1.78644	2.92812	3.41395	3.04237	1.01808
30.4177	42.5441	48.67	51.8206	43.8588	31.6116	37.9785	47.7827	52.8857	53.2195	45.6754	31.0841		1.3075	2.65595	1.35398	2.22755	1.37995		1.50488	2.28816	3.41414	3.04238	1.01813
24.9961	45.7411	53.0916	37.6777	40.5957	31.8925	36.336	46.3089	51.919	57.0927	45.8452	32.5447		1.30754	2.86811	1.35483	2.2279	1.38018		1.63775	2.55903	3.41426	3.04249	1.01825
29.2476	45.1839	55.7633	52.1692	41.6465	31.3654	36.5375	50.1838	60.6349	57.4969	43.7505	31.9558		1.30763	3.73175	1.35509	2.2291	1.38029		2.22596	3.93072	3.41445	3.04274	1.01842
31.5298	42.4012	50.925	48.9388	42.3705	31.381	35.4278	46.352	53.349	55.5701	44.698	31.4118		1.30763	3.21332	1.35574	2.22911	1.38036		1.82558	2.99488	3.41449	3.04279	1.01854
33.7285	38.1886	44.5955	48.4267	36.9051	31.4688	32.9641	42.5983	48.4259	55.7247	43.2482	32.1802		1.30772	2.52479	1.35682	2.22985	1.38052		1.68786	2.70883	3.41478	3.04286	1.01881
29.1537	36.6664	44.5441	38.4886	41.3723	30.5462	34.3912	44.7887	51.3126	53.3076	44.5085	30.9932		1.30773	2.99446	1.35724	2.23001	1.38057		1.81207	2.94905	3.41492	3.04286	1.01884
28.8798	35.6423	41.5378	43.3059	42.9107	31.0797	36.7791	46.4472	51.6004	51.8485	43.9117	32.6602		1.30777	2.3912	1.35815	2.23016	1.38058		1.52377	2.33594	3.41517	3.04288	1.01906
30.6449	38.36	42.4209	34.4767	24.7166	30.91	35.598	49.3425	60.166	57.9539	46.6721	31.5796		1.30791	1.9097	1.35926	2.23037	1.38067		2.28062	4.07656	3.41533	3.04334	1.01929
24.9159	43.243	52.7309	43.4061	38.9258	32.3013	35.4812	44.6056	49.3305	55.5145	45.0841	31.4953		1.30799	3.28658	1.35958	2.23071	1.38073		1.51512	2.2997	3.41581	3.04341	1.0194
30.3242	32.9335	36.8472	42.7537	40.9858	31.3923	36.941	50.2712	60.1816	56.4004	46.1054	31.0719		1.308	1.85358	1.36062	2.23122	1.38076		2.10553	3.6709	3.41615	3.04344	1.01944
31.8799	37.5788	42.5809	46.5268	35.047	32.9877	34.5815	45.9833	53.7887	55.2547	45.6743	30.8691		1.30801	2.27364	1.36082	2.23144	1.38078		1.87482	3.15826	3.41619	3.04344	1.01952
30.9442	42.3047	50.3732	50.145	39.3801	31.8013	36.3639	45.6597	50.4347	57.8343	45.6801	31.021		1.30806	3.1473	1.36125	2.23261	1.38088		1.53449	2.32273	3.41624	3.04371	1.01972
27.8303	40.4793	48.4556	49.9417	42.059	31.3587	34.4008	46.3079	54.8374	56.7294	44.6209	31.5548		1.30807	3.19469	1.36136	2.23267	1.38094		1.99935	3.43154	3.41638	3.04389	1.01978
30.4657	46.0339	52.2989	48.1103	46.0216	31.6241	35.1782	44.4969	49.513	56.379	46.3399	31.4101		1.30808	2.5056	1.36194	2.23336	1.38106		1.56547	2.40814	3.41648	3.04395	1.01986
27.824	39.22	43.9082	47.193	40.1352	32.6981	35.4866	46.9888	54.7341	57.0697	44.868	31.6959		1.30809	2.00218	1.36198	2.23452	1.38141		1.87718	3.14123	3.41649	3.04395	1.01996
30.5356	39.3637	48.1511	48.6171	41.5828	32.0595	35.5539	49.3631	60.2909	54.479	44.2017	31.1873		1.3084	3.24939	1.36231	2.23669	1.38148		2.28601	4.09504	3.41654	3.04395	1.02002
31.8348	38.4858	44.6024	37.0205	45.0302	31.2229	35.7233	47.7346	56.111	56.7558	45.8417	31.7819		1.30859	2.75441	1.36253	2.23752	1.38151		1.99722	3.39006	3.41686	3.04401	1.02008
26.1858	40.2904	44.8792	52.1358	43.8087	31.9759	34.3743	47.4408	57.5977	57.3511	46.6439	31.6162		1.30891	2.01599	1.36258	2.23793	1.38154		2.2628	4.02171	3.41694	3.04404	1.02008
29.567	36.8712	41.736	42.7088	44.5532	32.795	39.5108	53.8966	64.6757	55.0327	47.0687	30.6237		1.309	2.24058	1.36384	2.23866	1.38162		2.16606	3.78906	3.41701	3.04437	1.02008
30.5478	41.5405	51.5302	49.1891	43.2279	32.0437	35.9718	45.3339	50.2594	55.433	44.3904	32.9344		1.30913	3.65938	1.36399	2.23881	1.38167		1.54439	2.35693	3.41706	3.04437	1.02012
27.7598	35.0165	39.9717	49.8067	42.4035	31.8836	35.0087	44.5438	49.8578	52.9753	46.33	30.7789		1.30932	2.24926	1.36628	2.23934	1.38181		1.58713	2.47164	3.41714	3.04449	1.0203
27.2877	37.1573	41.5287	47.7509	46.2513	31.1206	37.5538	48.6622	55.4708	54.544	43.8232	31.5492		1.30932	1.98387	1.36651	2.23942	1.38186		1.71249	2.76211	3.41714	3.0445	1.02031
30.5123	36.1336	44.571	40.8523	41.7531	31.2679	35.9217	46.0173	51.8584	54.5073	43.6959	31.462		1.30935	3.18244	1.36675	2.23948	1.38186		1.67993	2.65191	3.41715	3.04452	1.02047
30.0858	38.8022	43.3929	51.3024	39.4998	31.4079	36.0944	45.8919	51.3295	56.614	44.8011	32.0083		1.3094	2.19516	1.36728	2.24178	1.38188		1.6403	2.55065	3.41723	3.04457	1.0206
26.5429	34.1149	38.0182	50.6012	43.1199	31.3633	33.4607	42.5865	47.6808	55.0738	45.2938	33.4439		1.30941	1.9451	1.36901	2.24186	1.3824		1.57073	2.44755	3.41737	3.04468	1.02076
27.2452	45.2394	56.0775	45.0657	42.3751	31.7329	35.3556	46.071	52.8119	51.8168	45.0036	32.6439		1.30952	3.73632	1.36922	2.24195	1.38269		1.72601	2.81181	3.41741	3.04469	1.02078
30.9569	34.2495	38.8691	52.1564	41.1242	29.9652	38.5477	53.7818	66.0097	56.2033	46.2467	31.3163		1.30965	2.17098	1.36945	2.24299	1.38274		2.36077	4.25566	3.41742	3.04471	1.02078
30.7278	40.266	47.5847	49.6862	34.6624	31.2875	36.5086	49.5581	59.1791	54.6617	45.0762	30.9911		1.30971	2.91113	1.37032	2.24314	1.38291		2.07563	3.60594	3.41746	3.04472	1.02083
29.4773	37.1377	45.9337	53.6584	38.271	32.2598	37.137	49.514	58.0743	53.75	44.5172	31.5385		1.31005	3.3307	1.37084	2.24369	1.38301		1.96521	3.32439	3.41746	3.04488	1.02084
28.7703	32.4514	36.0065	38.6092	45.1989	31.5082	35.1552	48.0462	57.7648	56.2824	45.3528	32.5623		1.31011	1.83113	1.3713	2.24391	1.38308		2.26186	3.96707	3.41747	3.04498	1.02099
31.4395	43.8344	49.2646	46.0383	42.3592	31.061	36.0923	47.2293	54.368	60.228	44.2057	30.8352		1.31021	2.26709	1.3716	2.24406	1.38317		1.83511	3.01139	3.4175	3.04511	1.02111
27.3349	37.7553	42.6675	41.7992	38.7827	30.433	36.9917	49.2316	57.6392	58.536	44.9366	31.9116		1.31027	2.09819	1.37444	2.24418	1.38329		1.94609	3.28287	3.4177	3.04512	1.02113
27.3153	40.5764	45.8405	48.9936	43.8875	32.6357	33.8327	45.3628	53.5054	53.9231	42.9497	31.6816		1.31035	2.23704	1.37485	2.24442	1.38338		1.95996	3.34408	3.41779	3.04517	1.02121
28.8227	36.634	40.702	57.6213	39.8002	30.3179	36.1166	49.0482	58.5968	52.5564	44.3891	32.0467		1.31037	1.9319	1.37533	2.2445	1.38343		2.09323	3.63886	3.41795	3.04526	1.02124
29.7811	44.2172	54.6304	47.2867	41.6028	31.6558	38.4014	51.217	60.0918	55.5431	45.3019	30.6255		1.3104	3.62901	1.3755	2.24663	1.38372		1.95434	3.30772	3.41882	3.04537	1.02135
26.1782	42.3831	49.5878	48.9523	44.3152	31.5284	35.1782	47.1667	55.6329	56.4646	42.9935	31.8163		1.31045	2.95064	1.37571	2.24676	1.38374		1.98023	3.37865	3.41895	3.0454	1.02138
26.8228	39.9629	49.5466	45.1446	36.1881	32.1777	32.9669	45.3579	54.8988	55.855	43.451	32.9456		1.31054	3.74152	1.37592	2.24696	1.38376		2.14434	3.79544	3.41899	3.04545	1.02142
27.2088	41.8446	51.2941	41.7855	42.0612	30.5104	35.4365	50.0619	62.2156	51.4755	44.1934	30.527		1.31057	3.4239	1.37711	2.24894	1.38382		2.36823	4.33621	3.41922	3.04547	1.02142
28.984	38.5686	45.6338	44.8969	38.4562	31.3795	36.0048	50.3951	62.0512	52.8302	44.2327	30.8916		1.3106	2.76394	1.37783	2.24909	1.38398		2.40148	4.34668	3.41929	3.04554	1.02158
28.6402	40.7444	49.6495	51.1391	29.5136	31.9671	34.8219	46.3946	54.3771	57.6933	43.467	32.7172		1.31062	3.28671	1.37812	2.2502	1.38423		1.97345	3.33468	3.41952	3.04558	1.02163
27.5748	40.443	48.9534	48.1871	39.6271	31.4315	35.5168	49.2344	60.0397	62.6887	46.8151	31.5356		1.31062	3.21978	1.37842	2.25073	1.38439		2.25611	4.03323	3.41972	3.04575	1.02175
28.4324	44.7312	54.9855	37.3594	31.1143	31.3774	34.9559	48.4832	59.1557	52.1809	45.4518	31.8024		1.31066	3.67448	1.37852	2.25076	1.3846		2.32181	4.15362	3.41982	3.04578	1.02185
28.9259	38.7341	43.719	50.2621	42.3763	30.6046	35.3174	45.6004	51.7945	54.736	44.1211	31.6745		1.31074	2.31265	1.37903	2.2517	1.38462		1.68924	2.70676	3.41984	3.0463	1.0219
30.4631	39.328	44.5236	49.9744	35.6746	31.3234	36.776	50.2357	60.3664	54.9043	45.2574	31.9291		1.3108	2.31815	1.37908	2.25337	1.38463		2.21202	3.87693	3.41986	3.04649	1.02203
28.1142	37.8519	45.5594	47.8609	41.5185	31.402	35.4256	49.4838	60.8054	53.5114	42.5658	30.1658		1.31094	3.09972	1.37917	2.25338	1.38484		2.35722	4.25558	3.42008	3.04669	1.02228
28.7772	37.9421	46.583	52.1482	41.726	31.0912	37.8551	47.5867	52.6235	55.7493	43.0103	31.3894		1.31094	3.11671	1.37963	2.25401	1.38511		1.5298	2.3216	3.42017	3.04708	1.02228
27.5612	39.6892	47.2519	51.1203	42.7899	32.8393	35.6455	48.7617	58.6798	53.4756	42.3634	30.4963		1.31098	3.07763	1.38062	2.25412	1.38524		2.10301	3.69323	3.4205	3.04716	1.02268
29.0068	39.6594	49.3186	43.5376	39.6267	32.2233	36.3076	45.8508	50.9366	52.7645	45.1875	31.1079		1.31107	3.67234	1.38236	2.25413	1.38538		1.50525	2.30744	3.42059	3.04737	1.02269
31.2257	39.609	46.5837	36.4165	40.2086	31.3874	39.839	54.7847	66.2742	55.6478	47.2588	32.3027		1.31108	3.00337	1.38321	2.25421	1.3854		2.28883	4.04837	3.42064	3.04753	1.02271
29.5695	33.9909	38.4598	44.7071	44.4339	32.1881	33.6755	47.5521	59.069	57.1083	46.8011	31.2159		1.31144	2.08634	1.38339	2.25522	1.38543		2.41543	4.42013	3.42081	3.0477	1.02276
31.8509	38.7132	44.3129	49.3798	42.9663	31.8982	37.0818	51.1207	61.9966	56.0167	43.732	31.6232		1.31147	2.31593	1.38428	2.25553	1.38545		2.25154	3.99579	3.42086	3.04773	1.02284
30.3568	36.1274	40.021	38.9172	46.1011	31.407	36.4612	48.4647	56.67	60.9497	46.1928	29.2938		1.31151	1.86154	1.3871	2.25561	1.38547		1.9604	3.30049	3.42102	3.04774	1.02285
26.8603	35.6651	40.3	54.2753	40.0216	31.2684	34.1868	43.6942	49.1273	55.3164	43.5637	31.464		1.31152	2.04259	1.3872	2.25617	1.3855		1.6472	2.58852	3.42124	3.04779	1.02292
30.3409	37.5602	44.1441	40.5214	38.9365	32.4981	35.9276	45.6058	50.9268	53.8755	46.895	31.1442		1.31156	2.76736	1.38762	2.25624	1.38551		1.62868	2.52411	3.42131	3.04784	1.02297
33.2615	36.5794	42.6168	44.0543	42.577	32.0338	34.5566	45.6734	53.1044	50.8837	47.2991	31.2951		1.31168	2.36179	1.38916	2.25653	1.38569		1.89188	3.15649	3.42189	3.04792	1.02314
27.1478	40.6639	45.5164	51.3687	41.9148	31.0757	37.3356	46.8932	51.8119	51.6707	48.9637	31.5177		1.31172	2.21612	1.3895	2.25693	1.386		1.5185	2.29998	3.4221	3.04795	1.02315
27.9193	34.5482	39.3789	42.6723	44.628	32.5136	36.8101	50.8966	61.9077	54.6639	41.5343	31.9983		1.31175	2.11672	1.39007	2.25702	1.38606		2.25825	4.02348	3.42217	3.04807	1.02317
30.674	35.6863	42.6561	36.7217	40.4253	31.269	34.2625	43.4058	48.3737	56.2254	45.5188	31.6826		1.31176	2.96192	1.39014	2.25703	1.38606		1.5839	2.44451	3.42226	3.04814	1.0232
25.636	34.0586	39.5914	54.347	44.3249	31.9555	37.9846	50.6183	59.3392	53.5807	43.5562	30.5471		1.31176	2.34553	1.39082	2.25749	1.38612		2.01684	3.40904	3.42239	3.04836	1.02333
27.2833	46.1805	57.2547	53.8203	38.0678	30.0482	36.0675	46.4393	52.6004	54.4226	46.5225	31.0891		1.31179	3.53347	1.39145	2.25762	1.38612		1.69208	2.69723	3.42256	3.04851	1.02337
26.9529	39.8888	45.4389	49.1989	41.5074	30.5569	35.2703	46.437	53.7839	57.659	43.8647	31.225		1.3118	2.11131	1.39229	2.25814	1.3862		1.85706	3.07889	3.42281	3.04857	1.02366
27.4506	39.5663	48.0488	47.5224	42.5902	31.009	35.1519	49.6357	61.6559	55.5586	44.6938	30.7772		1.31195	3.16901	1.39296	2.25817	1.38638		2.45018	4.48358	3.42287	3.04893	1.02367
28.3006	35.5446	39.5214	50.8839	40.199	30.9801	37.5812	48.7895	55.7207	53.3063	46.1864	30.8728		1.31195	1.98494	1.39308	2.25831	1.38647		1.78152	2.88321	3.42307	3.04902	1.02387
28.442	37.7663	45.3231	47.694	44.1478	30.7458	35.1296	47.2244	55.8463	54.474	43.5623	31.0944		1.31212	2.78235	1.39348	2.25843	1.38659		1.96237	3.36126	3.42307	3.04915	1.0239
30.435	41.6775	49.2066	46.7683	38.4849	31.1946	36.6214	47.7272	54.7181	53.6661	44.8139	30.4967		1.31216	2.92033	1.39367	2.25846	1.38673		1.75837	2.86523	3.42317	3.04917	1.02392
30.1859	39.6105	46.2638	44.9118	40.2345	32.8749	33.9018	45.4155	53.5205	52.5548	44.7042	31.1781		1.31225	2.54751	1.39403	2.25968	1.38677		1.95712	3.33481	3.42318	3.04918	1.02394
31.1935	37.5566	41.6586	46.2716	42.8151	32.3776	35.1536	46.2914	53.6247	55.4487	47.3156	31.7436		1.3125	1.97133	1.39456	2.26016	1.3871		1.88465	3.12554	3.42327	3.0492	1.02397
25.568	37.6584	41.9211	48.0451	42.2936	31.4261	34.7227	44.1902	49.4735	56.7652	44.8148	31.7539		1.31255	2.07152	1.39541	2.26035	1.38731		1.57316	2.45105	3.42333	3.04928	1.02411
27.9791	38.171	44.9024	45.4123	41.1985	33.023	35.1599	48.6074	59.114	53.0383	44.9118	31.3267		1.31256	2.72174	1.3958	2.26101	1.38737		2.21358	3.94307	3.42337	3.04947	1.02413
32.3667	37.1124	41.9299	50.6145	37.2864	30.8653	35.6172	44.8946	49.7808	52.3345	44.6792	32.2229		1.31258	2.23047	1.39586	2.26118	1.38749		1.4993	2.28897	3.42351	3.04955	1.02417
33.3305	41.7386	50.9301	43.099	43.1825	31.4076	34.7401	45.894	53.3353	59.1922	45.8437	31.48		1.31264	3.46999	1.39591	2.26171	1.38768		1.86121	3.10292	3.42371	3.04957	1.0242
31.7118	37.8612	42.4394	52.0442	39.1815	31.6914	35.0019	47.9943	57.8923	57.0523	45.1758	31.218		1.31277	2.2073	1.39637	2.2621	1.38787		2.13951	3.76947	3.42381	3.04957	1.02427
31.8286	43.142	51.5877	45.28	31.9781	30.6101	33.9518	44.6028	51.5462	57.2137	46.3894	32.0234		1.31289	3.03895	1.39776	2.26218	1.38801		1.82453	3.01392	3.42382	3.04957	1.02459
29.5403	40.1852	46.5273	48.2858	29.4604	31.5251	33.691	46.8969	57.4259	54.4026	44.4696	32.1667		1.31295	2.53445	1.39777	2.26226	1.3882		2.30973	4.15129	3.42385	3.0497	1.02466
31.2444	38.127	43.3113	40.9962	38.8562	31.5966	36.7392	47.1524	53.2368	58.5639	45.2897	31.3298		1.31307	2.33745	1.39779	2.26274	1.38826		1.67978	2.66127	3.42399	3.04974	1.02471
32.4122	44.0936	54.7218	42.9198	40.3319	31.2032	33.7245	46.932	57.455	54.6058	44.302	31.2367		1.31318	3.69245	1.39791	2.26275	1.38829		2.24416	4.03216	3.42506	3.04975	1.02472
29.203	40.6377	46.1144	50.7908	36.6956	31.4513	35.0084	44.3148	49.3469	57.2178	41.7793	31.6976		1.31331	2.16538	1.39809	2.26305	1.38836		1.54616	2.38219	3.42514	3.04979	1.02474
27.5059	33.828	38.9806	39.4733	45.8601	31.0743	36.1597	48.3523	56.8779	56.9778	45.8346	32.2961		1.31353	2.32639	1.39939	2.26458	1.3885		2.00509	3.40715	3.42522	3.04985	1.02479
29.7718	35.8474	39.8488	45.6161	40.897	31.9996	34.3809	48.0414	59.0538	56.6278	44.3543	30.7986		1.31366	1.89966	1.39978	2.26465	1.38855		2.28069	4.11927	3.42558	3.05004	1.02479
25.9659	36.8037	43.9956	44.8368	44.7082	32.6878	35.0994	45.5627	52.0299	62.2363	46.7438	32.2444		1.31419	2.73178	1.39993	2.26493	1.38863		1.76647	2.85832	3.42591	3.0503	1.02497
30.6601	42.2147	49.4844	49.1891	30.1933	30.7192	33.7994	45.1858	53.1409	55.9621	45.4011	32.6282		1.31424	2.90362	1.40103	2.2653	1.38869		1.98109	3.36518	3.42612	3.0504	1.02527
27.9086	38.9277	43.733	52.1374	39.303	32.0774	35.1418	47.447	56.3544	52.411	44.9703	31.9146		1.31429	2.17153	1.40238	2.2654	1.38884		2.05421	3.54119	3.42689	3.05042	1.0253
32.5707	39.4225	46.279	40.4352	41.4089	31.7833	35.797	49.1549	59.3773	55.3706	45.5808	31.9031		1.31444	2.82174	1.40306	2.26547	1.38891		2.19879	3.88147	3.4269	3.05045	1.0254
31.091	40.213	47.6758	46.3686	39.1991	32.0087	33.8175	43.0066	48.113	56.0364	43.1268	31.674		1.31462	2.89886	1.4037	2.26579	1.38915		1.55479	2.4188	3.4269	3.05051	1.02579
30.8764	41.8973	49.6237	51.4685	43.1754	31.2084	38.5636	49.5117	55.9207	53.3422	46.4885	31.1595		1.31486	3.04277	1.40424	2.26625	1.38915		1.63538	2.59272	3.42691	3.05058	1.02596
28.8102	40.8333	50.2814	38.2543	44.678	30.62	35.8537	48.9786	58.859	52.9792	46.7383	31.6796		1.31493	3.60876	1.40434	2.26631	1.38922		2.1484	3.7657	3.42695	3.05067	1.02602
26.9153	36.5174	44.631	50.6607	45.2636	31.0683	36.7402	51.9175	64.5387	56.5908	42.267	32.0689		1.31504	3.17835	1.40488	2.2665	1.38928		2.55562	4.68084	3.42697	3.05075	1.02613
29.4967	40.4418	50.2948	40.9384	36.612	30.6855	35.2833	44.6525	49.7114	55.6672	45.77	30.1293		1.31515	3.78879	1.4057	2.26653	1.38955		1.55033	2.38743	3.42703	3.05106	1.0263
30.7306	41.7173	49.26	44.4257	41.629	30.6171	36.6115	46.5117	51.9805	55.3835	51.0531	31.0279		1.31516	3.03907	1.40613	2.26668	1.38958		1.58682	2.46338	3.42709	3.05112	1.02637
26.537	42.271	51.5261	50.1099	42.6221	32.9598	34.1759	44.4558	50.8711	53.646	45.4817	30.3651		1.31534	3.45007	1.40629	2.26688	1.38989		1.73522	2.81811	3.42719	3.0512	1.02637
25.9911	32.8711	36.3533	46.52	43.0909	32.0636	34.8282	44.8298	50.7619	56.7108	45.1132	30.6037		1.31535	1.75444	1.40673	2.26697	1.38989		1.72369	2.74603	3.4273	3.05126	1.02645
28.2093	42.1428	49.1003	43.4144	42.9895	31.3279	36.5673	46.2222	51.3977	57.1628	43.4786	30.4641		1.31543	2.87352	1.40693	2.26857	1.38996		1.60345	2.46297	3.42735	3.05128	1.02652
28.2158	39.4062	46.5484	40.6827	36.8961	31.5787	34.5732	45.2371	52.0695	53.8367	42.6088	31.7053		1.31559	2.86999	1.407	2.26881	1.38998		1.81688	2.98097	3.4274	3.05128	1.02653
29.7084	34.7898	39.2147	41.8595	38.9582	32.3504	35.5495	49.9125	61.648	50.8374	43.0729	31.6684		1.31567	2.04506	1.40731	2.2706	1.39021		2.41784	4.39337	3.42752	3.05134	1.02662
29.8935	43.3189	52.9251	44.8474	43.18	30.8429	36.4719	46.3929	51.9132	52.2866	44.5299	31.2862		1.31571	3.35549	1.40776	2.27101	1.39036		1.60827	2.50316	3.4276	3.05139	1.02663
26.0083	36.5634	42.0561	21.2109	34.6486	29.9065	34.7263	44.5135	50.195	55.7148	44.4255	30.8912		1.31589	2.28499	1.40791	2.27114	1.3907		1.61154	2.54703	3.42786	3.05142	1.02677
31.7628	32.5022	36.4731	52.3536	42.0116	31.4141	36.1721	49.2398	58.9648	53.6468	47.4372	32.2286		1.31593	1.85196	1.40814	2.27226	1.3907		2.16861	3.78249	3.42819	3.05173	1.02679
27.9909	41.8939	46.7891	41.9683	42.2471	31.8408	35.867	45.9051	51.6847	54.5617	44.3336	31.2115		1.31594	2.05748	1.40886	2.27262	1.39108		1.66	2.61576	3.42822	3.05215	1.02681
29.5047	43.9004	48.5939	52.2766	41.2387	30.7719	38.0905	53.7731	66.7802	51.4356	44.7068	31.1323		1.31603	1.95189	1.41059	2.27274	1.3913		2.44693	4.47641	3.42824	3.05222	1.02694
28.0978	35.0094	39.1992	49.097	39.0948	31.3199	34.9415	49.1034	60.7037	56.2719	44.616	31.335		1.31603	1.86691	1.41063	2.27328	1.39145		2.35998	4.2931	3.42843	3.05229	1.02695
32.1054	39.9986	46.1451	55.2445	41.3284	32.4488	34.8735	44.8366	50.7113	53.9896	43.6105	31.8961		1.31632	2.7413	1.41092	2.2735	1.39151		1.69805	2.69929	3.42845	3.05246	1.02696
30.6488	34.8505	39.1875	45.6008	42.5002	32.2831	34.7479	47.153	56.2892	55.582	45.5485	31.287		1.31633	1.91465	1.41459	2.27351	1.39153		2.14608	3.72662	3.42857	3.05254	1.02699
31.4623	36.6862	45.1434	50.5512	42.3178	32.1831	36.4864	50.5977	61.7257	59.1689	46.7339	31.8074		1.31636	3.2338	1.415	2.27371	1.39163		2.25148	4.02695	3.42885	3.05257	1.02709
28.017	40.5913	50.2258	45.9613	42.6224	31.4616	35.5368	46.0262	52.4403	61.368	44.2088	31.5576		1.31641	3.45093	1.41562	2.27431	1.39172		1.74642	2.81434	3.4289	3.05282	1.02721
30.8895	40.1704	49.4049	49.5987	40.2578	31.6334	34.2427	43.6865	49.0298	50.1041	42.5957	30.8119		1.31647	3.33071	1.41571	2.27483	1.39196		1.6451	2.57591	3.42912	3.05293	1.02746
28.2052	39.6854	48.2986	45.2978	43.0485	32.0889	34.8643	43.7555	48.308	52.8061	45.3107	31.2911		1.31659	3.31663	1.41589	2.27496	1.39221		1.50305	2.27263	3.42921	3.05316	1.02762
29.371	42.2683	50.3746	49.9042	42.5279	32.312	34.8134	45.2032	51.6329	54.8927	45.9624	32.0583		1.31659	3.05684	1.41607	2.27537	1.39226		1.70961	2.7676	3.42925	3.05318	1.02774
33.0454	38.2633	44.2988	35.7921	42.1886	31.4365	36.6097	50.1298	60.3852	56.7247	45.2663	29.2722		1.31661	2.54751	1.41624	2.27668	1.39233		2.19744	3.86426	3.42961	3.05323	1.02784
32.0123	37.2468	45.2766	42.1471	40.6503	31.0954	35.6066	45.8723	51.9882	54.6118	44.7315	31.5556		1.31662	3.12096	1.41647	2.27751	1.39237		1.66466	2.65639	3.42976	3.05329	1.02788
29.3184	38.3744	43.8895	48.3527	41.0933	32.005	36.3643	48.5783	57.0877	54.5226	43.3849	30.3499		1.31663	2.40587	1.41667	2.27788	1.39248		2.02731	3.43974	3.4298	3.05329	1.0279
25.7208	38.6046	42.6137	45.1155	42.8905	32.5689	35.2936	49.3134	60.6133	55.2404	46.9822	31.0845		1.31666	1.88388	1.41711	2.27811	1.39281		2.33099	4.20977	3.42993	3.05329	1.02794
26.6995	40.9525	47.7191	42.4038	42.0504	32.1034	38.8472	52.1953	61.6933	59.8412	44.0398	31.7169		1.31675	2.60169	1.4177	2.27841	1.39286		2.01131	3.44247	3.42997	3.05342	1.02805
33.3522	45.9361	54.6799	41.2412	45.399	32.0586	35.1932	44.9906	50.5963	56.8394	44.629	30.6134		1.31691	3.18635	1.41794	2.27842	1.39304		1.64301	2.58308	3.43001	3.05365	1.02807
32.7009	46.3729	56.5824	44.9437	41.5434	33.0527	36.7317	50.8335	61.886	54.9976	45.3557	31.4767		1.31708	3.51971	1.41817	2.27859	1.39324		2.18502	3.89757	3.43015	3.05375	1.02807
26.8338	36.9569	43.1216	43.3135	42.4043	32.5953	35.5366	45.9573	52.284	59.2649	44.6131	31.6368		1.3172	2.54282	1.41872	2.27915	1.39327		1.71996	2.76418	3.43049	3.05395	1.02812
33.1822	31.1288	34.5879	47.2578	40.8315	31.4885	37.2155	48.1252	54.7464	51.8495	43.4481	30.3479		1.31725	1.78904	1.41875	2.27919	1.39335		1.74131	2.79813	3.43054	3.05402	1.02815
32.741	44.11	52.1944	47.6315	34.2232	31.5361	35.0529	47.5657	56.7803	58.1234	45.5621	31.6451		1.31725	2.87743	1.41898	2.28097	1.39379		2.1127	3.66853	3.43101	3.05403	1.02823
28.5645	40.941	50.2221	37.983	40.6668	30.4977	34.8242	43.9078	48.7008	57.0541	45.8939	30.8828		1.31732	3.41852	1.42043	2.28099	1.39382		1.45679	2.22547	3.43168	3.05413	1.02828
27.0417	37.6324	42.6396	48.0337	42.4532	31.8321	36.1255	45.9416	51.3963	56.1057	42.5747	31.9115		1.31735	2.24453	1.42097	2.28131	1.39384		1.58852	2.47125	3.43197	3.05419	1.02831
27.7034	38.5947	43.3088	50.2888	43.5166	31.8163	36.0222	45.5947	50.7684	57.7818	46.3924	31.6928		1.31738	2.09099	1.4211	2.28152	1.39386		1.60201	2.46784	3.43204	3.05425	1.02878
30.4177	47.1082	57.1404	46.7207	35.2907	31.2677	38.3579	48.9246	54.8952	50.7774	46.7217	31.598		1.31739	3.53851	1.42324	2.28224	1.394		1.70282	2.66497	3.43234	3.05427	1.0289
28.7562	38.9454	43.0394	51.2424	42.3081	31.9149	37.2992	48.1664	54.7171	53.6516	45.3214	30.608		1.31774	1.83929	1.42328	2.28257	1.39401		1.77605	2.84665	3.4324	3.05427	1.02899
28.7498	39.416	48.4089	48.7636	37.1513	33.4484	36.3984	51.299	63.6018	55.635	47.1044	32.2993		1.31779	3.30274	1.42329	2.28281	1.39401		2.47699	4.52215	3.43247	3.05451	1.0291
32.9557	35.3139	41.1237	41.3763	42.6989	30.4035	34.0181	46.699	56.3949	53.0697	45.3242	31.0888		1.31782	2.48297	1.4234	2.28325	1.39411		2.09018	3.68834	3.43253	3.05466	1.02915
30.1443	33.8299	39.1775	48.2991	43.3117	30.7363	33.2344	45.4554	54.6912	55.3226	41.8651	30.5722		1.31785	2.22917	1.42496	2.284	1.39425		2.13097	3.7414	3.43256	3.05475	1.02924
27.4275	34.5469	38.9447	34.0164	43.4152	32.2601	36.791	48.2152	55.5853	54.6295	44.2841	32.4586		1.31793	1.97946	1.42526	2.28484	1.39455		1.80361	2.96719	3.43313	3.05486	1.02935
27.5133	37.4401	42.1418	52.3178	41.5253	30.111	36.0523	48.9308	58.4205	52.5263	44.1292	32.0267		1.31797	2.02244	1.42575	2.28485	1.3946		2.05787	3.57425	3.43325	3.05491	1.02935
30.3421	38.0552	42.1689	50.7723	42.5955	31.4786	37.4519	48.5824	55.4393	54.437	43.5116	30.8632		1.31808	1.82501	1.42621	2.28551	1.39468		1.72322	2.78481	3.4337	3.05502	1.02937
29.7455	39.3181	45.7314	47.9541	44.297	30.3257	36.7935	49.1698	57.8044	53.0256	44.2844	32.1909		1.31818	2.83595	1.42631	2.28624	1.39474		1.90502	3.23409	3.43407	3.05507	1.02937
29.3203	39.4901	48.3409	49.967	39.2715	32.0974	37.6754	52.038	63.2293	53.3785	44.4511	31.4627		1.31825	3.23556	1.42635	2.28707	1.39479		2.3068	4.10424	3.43448	3.05511	1.02942
29.3104	38.3845	43.6079	53.9467	35.7127	30.4466	36.5933	46.0633	51.0086	53.312	43.4928	31.2767		1.31826	2.23481	1.42653	2.28784	1.39485		1.50902	2.29704	3.43453	3.05523	1.0298
27.8812	41.0332	49.5428	52.1624	40.8336	32.4743	34.5405	45.5741	52.8983	55.7413	46.559	32.8322		1.31828	3.28099	1.42802	2.28792	1.39494		1.89537	3.15353	3.4346	3.05539	1.0299
27.6765	36.425	42.5912	48.6215	44.9085	32.0747	33.8916	44.3989	51.1666	57.3694	45.5082	31.3788		1.3184	2.53235	1.42814	2.28834	1.39502		1.82073	2.99345	3.43513	3.05559	1.03003
26.5034	43.8907	50.6082	46.9277	40.9158	30.4869	38.6295	51.0735	59.4028	55.5727	43.7705	30.0182		1.31853	2.76006	1.42817	2.28916	1.39514		1.91166	3.19121	3.43532	3.05559	1.03008
29.2421	46.7037	57.097	36.2962	40.539	31.4779	35.0318	44.2425	49.1531	52.0554	44.5487	32.5424		1.31854	3.54386	1.42903	2.28916	1.39535		1.55005	2.37645	3.43554	3.05568	1.03009
28.6223	35.6628	40.4243	46.8087	41.0513	32.0138	37.9621	49.1161	55.9025	57.7708	44.7944	30.7753		1.31861	2.14658	1.42926	2.28926	1.39541		1.70685	2.74534	3.43625	3.05578	1.03011
33.3452	34.6376	40.9784	45.5201	37.5496	30.8629	33.5025	42.4878	47.4009	58.8196	41.8631	33.598		1.31868	2.73574	1.42955	2.28943	1.39556		1.5454	2.3904	3.43644	3.05585	1.03014
29.4141	38.4321	44.056	47.8092	41.6308	30.3252	35.7693	45.8838	51.7776	56.198	42.1742	31.4197		1.31873	2.18947	1.42977	2.2895	1.39563		1.64846	2.60904	3.43666	3.05587	1.03026
31.7756	33.8849	38.0637	41.7952	37.3373	31.1057	39.0565	52.0287	60.9715	56.6988	48.3557	31.3758		1.3189	1.94393	1.43064	2.28954	1.39563		1.98038	3.34561	3.43668	3.05587	1.03068
31.8173	41.1822	50.512	52.7519	39.8693	31.9757	34.5935	47.8813	58.3004	59.8192	43.5519	31.5136		1.31894	3.47553	1.431	2.28967	1.39579		2.24984	4.01397	3.43687	3.05605	1.03071
30.9425	44.2414	53.1973	40.2781	40.3205	30.1384	37.8288	52.6552	64.4754	55.6413	42.8021	32.3171		1.31907	3.19599	1.431	2.29117	1.39611		2.33411	4.19495	3.43691	3.0561	1.03084
29.8376	35.2629	40.0652	49.0346	42.2356	30.8732	35.4069	44.8761	50.0353	55.1801	45.9134	31.4595		1.31916	2.1142	1.43124	2.29135	1.39624		1.59491	2.46388	3.43704	3.05621	1.0309
27.5033	42.7669	52.4739	34.7751	39.9642	31.6271	37.8289	48.1143	53.8343	56.7664	46.2892	30.6521		1.31922	3.54218	1.43134	2.29229	1.39634		1.61306	2.51012	3.43711	3.05632	1.03111
25.8509	39.7475	46.1696	43.8814	42.8248	32.1915	36.5042	48.6053	56.9322	53.1704	43.5959	31.9788		1.31923	2.54084	1.43173	2.29243	1.39636		2.03948	3.44287	3.43723	3.05651	1.03113
28.3734	39.636	44.5704	50.5046	42.6106	31.2113	34.4546	46.9678	56.3232	57.8591	46.3418	32.5001		1.31929	2.01332	1.43175	2.29258	1.39651		2.16556	3.78463	3.43727	3.05662	1.03117
30.0842	38.3604	46.4324	44.9698	42.216	32.4171	36.8606	50.372	60.555	52.8038	45.8873	32.273		1.31932	3.16473	1.43226	2.29264	1.3967		2.13251	3.73971	3.43759	3.05715	1.03118
29.0828	36.3942	41.3289	50.9317	33.5003	31.6605	34.2651	44.616	51.1051	56.7418	45.6797	30.921		1.31937	2.15921	1.43229	2.29271	1.39672		1.76454	2.87074	3.43798	3.05715	1.03148
29.3814	40.7202	48.7503	54.8853	41.3624	29.9178	35.1528	48.0819	57.8546	54.1546	44.7583	32.131		1.31977	3.02355	1.43289	2.29291	1.39676		2.14848	3.77244	3.43812	3.05751	1.03152
27.7058	39.0619	46.571	44.3904	44.0549	31.8341	33.8207	42.4422	46.8541	55.5724	46.6257	30.3396		1.31993	2.93529	1.43343	2.29367	1.39676		1.50983	2.28245	3.43833	3.05752	1.03152
29.4007	38.7631	43.2957	26.6432	43.1402	30.7597	33.7621	45.4705	53.8721	56.8706	44.4032	30.3821		1.31999	2.15627	1.43507	2.29413	1.39682		2.01672	3.46387	3.43848	3.05803	1.03153
26.8569	35.7901	44.4143	46.4893	39.8853	31.7165	32.4524	40.9009	45.3476	50.8716	45.7805	30.2038		1.32003	3.32248	1.4351	2.29418	1.39682		1.46491	2.23593	3.43862	3.05825	1.03154
30.3543	35.2694	39.019	49.7874	35.6258	31.0107	33.4948	42.8981	48.3318	56.8572	43.9683	31.2256		1.32011	1.81774	1.4353	2.29446	1.39687		1.60841	2.53783	3.43879	3.05828	1.03161
30.2149	42.657	52.9574	48.9364	41.5845	32.0636	34.8873	43.7764	48.3221	55.9195	44.8904	31.3069		1.32026	3.84153	1.43554	2.29447	1.39719		1.4565	2.20133	3.43886	3.05835	1.03168
32.5866	35.5454	42.9194	49.1796	44.9659	31.5074	34.6483	48.9719	60.8902	55.3173	43.969	31.421		1.32027	2.97206	1.43563	2.29464	1.3974		2.47344	4.53151	3.43887	3.05837	1.03168
25.1599	37.7664	45.8776	40.1167	41.0289	31.4949	34.1419	44.651	51.3699	57.8311	42.8978	31.9123		1.32029	3.14116	1.4357	2.29464	1.39748		1.76295	2.89009	3.43902	3.05864	1.03172
27.72	38.4837	44.7042	48.5456	37.3418	31.8715	34.608	47.9918	58.5453	56.0424	45.1596	32.1858		1.32072	2.62322	1.43621	2.29492	1.39764		2.27711	4.07266	3.43913	3.05913	1.03176
29.696	39.2931	47.4724	47.3148	43.7641	31.1903	35.3336	49.8576	61.8885	59.8011	43.0701	30.7119		1.32073	3.10147	1.43643	2.29502	1.39789		2.34762	4.29224	3.43933	3.0595	1.03177
30.2078	35.8317	39.9556	49.9883	41.4212	32.5682	33.1486	43.1928	49.51	53.6286	44.1996	32.4042		1.32073	1.94232	1.43668	2.29575	1.39809		1.75558	2.85972	3.43935	3.05991	1.03177
30.8053	38.57	44.343	49.9608	32.3201	30.5919	33.8072	45.5443	53.975	59.0631	43.0442	32.2884		1.3208	2.38073	1.43692	2.29616	1.39838		1.99091	3.42098	3.43937	3.05993	1.03178
30.4298	36.5047	41.4574	48.2954	36.543	32.533	35.2222	44.2219	48.8418	54.3253	43.0281	31.049		1.32086	2.18273	1.43694	2.29673	1.39871		1.48396	2.24575	3.4397	3.06037	1.03182
26.2397	42.6735	53.0025	47.7583	44.6426	31.5881	35.0561	44.7597	50.2742	54.8062	42.8707	32.4018		1.32086	3.42203	1.43717	2.29677	1.39881		1.61113	2.52672	3.43978	3.06039	1.03186
31.6571	37.4232	41.8642	34.2139	41.416	31.8389	34.5321	47.0759	56.4558	56.25	44.4576	31.6653		1.32107	1.88039	1.43807	2.2976	1.39885		2.11573	3.69781	3.43992	3.0604	1.03188
29.5898	38.6536	44.3912	46.3505	47.3948	31.7713	36.2845	49.5128	59.4358	59.6159	43.7935	31.3833		1.32118	2.43243	1.44047	2.29781	1.39914		2.14906	3.76113	3.44051	3.06041	1.03188
29.9988	40.397	49.3636	50.4428	41.7753	32.1209	38.1398	49.9092	57.4536	57.8632	46.1004	32.1138		1.32124	3.3465	1.44096	2.29794	1.39923		1.7854	2.92987	3.44066	3.06041	1.03193
34.7966	38.8627	44.8357	48.6514	43.6037	30.072	34.7366	46.4099	54.5466	55.3757	43.7052	32.2594		1.32125	2.51929	1.44195	2.29797	1.39923		1.93647	3.28626	3.44069	3.06049	1.03194
29.0319	35.7342	42.8738	46.0792	44.8428	32.7531	36.3438	48.8891	57.8532	52.9464	46.4272	32.3034		1.32127	2.90861	1.44209	2.29821	1.39931		2.00701	3.4411	3.44071	3.06091	1.03194
26.9612	35.7758	41.549	40.4409	42.787	32.1885	37.6048	52.2429	63.8476	56.5638	45.7884	31.8043		1.32158	2.48294	1.44247	2.29846	1.39944		2.27514	4.07883	3.44089	3.06101	1.03205
26.9856	39.735	48.0356	53.4202	44.7959	31.2722	35.5355	46.47	53.4586	54.3497	46.0764	30.7762		1.32164	3.12896	1.4433	2.29853	1.40001		1.83637	3.01004	3.44093	3.06102	1.03207
32.5198	38.4032	44.1807	49.0928	44.4195	31.3541	36.1362	50.6343	62.414	57.6362	44.4572	29.5754		1.32169	2.41582	1.44474	2.29855	1.40007		2.38412	4.32121	3.44112	3.06102	1.0321
28.5262	38.6021	42.8469	26.8803	37.5803	32.3612	36.0249	45.3594	50.2419	55.172	45.213	31.319		1.32181	2.08351	1.44508	2.29862	1.40019		1.56397	2.38201	3.44137	3.06117	1.03214
30.9792	40.6168	48.6884	44.9127	42.0369	31.5101	36.7128	50.6859	61.559	51.9036	42.3578	31.0104		1.32182	3.10642	1.44541	2.29866	1.40033		2.23185	3.96855	3.4414	3.06119	1.03242
29.9246	40.8143	46.5058	51.1171	42.8491	30.9795	34.6077	48.5303	59.8669	52.1498	44.2007	31.6609		1.32187	2.29224	1.4458	2.29932	1.40037		2.34772	4.25938	3.44163	3.06144	1.03242
32.0756	44.0929	54.0279	53.2168	40.9916	32.7993	37.3165	50.0502	59.0533	51.3791	44.4007	31.5953		1.32189	3.46804	1.44668	2.30004	1.40037		1.97798	3.37648	3.44192	3.06149	1.03249
28.3773	36.386	41.5895	49.9141	42.2297	30.4016	35.5848	50.1772	62.2417	58.6823	45.3211	32.3223		1.32196	2.35644	1.44764	2.30019	1.40063		2.47533	4.52186	3.44197	3.06162	1.03259
30.9718	42.6053	50.2291	41.581	42.9117	31.5195	35.7443	48.7717	58.5415	54.5233	45.7351	31.8651		1.32196	2.94581	1.44967	2.30092	1.40064		2.14663	3.75647	3.44208	3.06162	1.0326
28.437	45.2067	52.3804	47.4312	40.7036	30.7264	37.4606	49.1355	56.6957	57.7494	46.7598	31.7245		1.32203	2.84491	1.45015	2.3012	1.40091		1.86124	3.06651	3.44213	3.0617	1.03261
27.1542	43.2982	52.773	51.8056	41.8376	32.6928	37.0399	51.3563	62.6399	55.3841	45.003	30.7952		1.3221	3.62753	1.45063	2.30137	1.40106		2.28574	4.08728	3.44216	3.06172	1.03264
28.2729	42.3139	51.0936	41.0223	40.8191	33.1911	34.7118	43.9107	48.8649	57.449	45.0422	31.7013		1.32229	3.28613	1.45082	2.30138	1.40139		1.58644	2.44085	3.44221	3.06179	1.03272
33.1696	34.4068	39.4423	48.4192	40.9456	31.8897	34.5567	44.1126	49.5367	53.9691	44.6184	31.0012		1.32236	2.1631	1.45319	2.30284	1.40144		1.63085	2.55655	3.44246	3.06194	1.03279
28.5652	36.7988	43.1017	47.2126	26.8397	31.7877	34.689	45.1389	51.6708	56.0299	42.7328	31.4877		1.32237	2.70126	1.45337	2.30316	1.40147		1.71909	2.79362	3.44249	3.06195	1.03288
32.0028	34.4143	39.07	48.9905	27.2208	32.1508	34.1319	45.4458	53.2306	54.4328	45.5716	32.0027		1.32259	2.2247	1.45383	2.3032	1.40148		1.93434	3.2653	3.44262	3.06196	1.03295
27.8048	36.8971	43.159	48.1684	19.3191	31.0175	35.0169	46.0197	53.204	54.4211	46.8081	30.6677		1.32272	2.6568	1.45442	2.30334	1.40149		1.79876	2.97327	3.44269	3.06211	1.03303
31.7204	33.0165	36.8809	47.805	45.0557	31.99	35.721	44.9397	49.736	57.3346	44.7639	31.416		1.32279	1.85951	1.45444	2.30346	1.40156		1.50574	2.28915	3.44275	3.06213	1.03305
26.458	35.4483	39.7812	48.2389	41.6003	30.9086	35.3512	46.2973	53.3387	51.955	44.264	30.9079		1.3228	1.98021	1.45504	2.3038	1.4017		1.86908	3.0714	3.44276	3.06216	1.03309
32.1243	35.2346	40.4474	44.5945	41.0785	30.7241	37.3169	47.5388	53.2751	56.6279	42.8997	31.321		1.32288	2.25941	1.45552	2.30436	1.40181		1.58814	2.47938	3.44325	3.06222	1.03313
30.4635	45.0179	55.8288	49.7321	42.779	32.2915	36.1399	48.6152	57.5296	54.2185	44.7257	31.5341		1.32297	3.94328	1.45556	2.30529	1.40192		2.0999	3.60041	3.4434	3.06223	1.03336
30.9899	37.194	42.1017	53.5885	38.9722	32.1214	35.1491	44.7722	50.1693	55.8292	46.8954	30.4333		1.32305	2.15498	1.45573	2.30536	1.4023		1.61879	2.52667	3.44364	3.06233	1.03346
30.1458	37.8961	43.3934	47.5449	43.5681	32.1285	35.3319	47.0057	55.0135	57.1138	45.7443	31.7561		1.32307	2.11458	1.45653	2.3063	1.40256		1.96663	3.31564	3.44369	3.06235	1.03352
28.5774	36.9469	40.8955	52.6907	44.6931	31.2677	34.6166	45.7388	53.1642	57.7178	43.4381	31.5086		1.32324	1.95103	1.45707	2.3065	1.40267		1.88015	3.13538	3.44375	3.06245	1.03356
34.4943	37.2733	44.6852	41.3663	42.761	32.7747	34.6278	47.1473	56.4708	55.8508	45.2359	32.0071		1.32325	2.84305	1.45718	2.30684	1.40271		2.20837	3.85297	3.44389	3.06247	1.03367
30.1821	39.6618	45.6938	49.4688	32.1196	30.6568	37.0916	48.706	56.263	55.1593	46.4869	31.7278		1.32329	2.38296	1.45869	2.3071	1.40274		1.84267	3.04162	3.44426	3.06256	1.03385
30.8779	39.9269	45.5127	48.695	31.4282	31.6814	36.8041	50.3185	60.5193	53.4824	41.625	30.7183		1.32336	2.26609	1.45903	2.3072	1.40288		2.15947	3.78945	3.44435	3.0627	1.03388
27.8819	38.5819	47.0356	30.5725	43.1825	31.5855	35.0843	47.8484	57.4058	59.5426	44.8984	29.8687		1.32338	3.03555	1.46057	2.30748	1.40295		2.13521	3.73401	3.44448	3.06285	1.03389
31.6818	41.7584	49.4495	49.1649	41.8797	31.0619	36.846	51.3335	62.9139	61.622	43.8647	30.7975		1.32339	2.78902	1.46219	2.30783	1.40303		2.26092	4.06814	3.44457	3.06293	1.03394
27.967	38.2801	43.2107	40.8795	42.6524	32.5559	35.7109	46.5684	53.4215	54.4738	48.975	30.0664		1.32344	2.11896	1.46331	2.30814	1.40311		1.78921	2.91853	3.44471	3.06297	1.034
29.4313	41.5491	49.5173	50.8235	41.9552	30.5727	35.7168	46.9129	54.2057	56.6228	46.3128	31.6815		1.32355	3.12045	1.46351	2.30823	1.40314		1.85867	3.06937	3.4448	3.06299	1.03402
27.3863	38.9343	44.1158	49.8709	41.0359	32.11	35.5235	45.6066	51.5078	57.2248	45.3879	31.0913		1.32355	2.2695	1.46391	2.30857	1.40316		1.68076	2.66445	3.44518	3.06316	1.03422
27.8847	34.9646	41.9464	51.511	35.1814	31.9082	33.9232	44.5057	51.3652	55.5597	48.0393	31.1628		1.32376	2.76614	1.46398	2.30868	1.40317		1.82164	3.00241	3.44546	3.06334	1.03467
28.3673	35.823	42.0235	32.8673	41.8824	30.599	34.7115	44.2144	49.5437	55.0655	44.1177	31.4328		1.32377	2.6437	1.46419	2.30958	1.40317		1.61981	2.52821	3.44554	3.0634	1.03486
25.2705	38.5713	46.563	39.9641	40.2035	32.3527	39.1042	49.2784	54.629	54.9565	47.0315	30.0685		1.3242	3.24605	1.46481	2.30982	1.40324		1.563	2.38498	3.44614	3.06347	1.03491
28.6454	40.0388	48.4454	47.4619	40.09	31.6083	33.2257	44.9376	53.4663	54.9751	47.2845	31.1881		1.3244	3.48687	1.46535	2.31148	1.40339		2.04904	3.54117	3.44616	3.06351	1.03491
28.8049	41.3015	50.341	50.4136	40.9816	30.0743	36.3655	47.7704	55.2029	54.6111	43.1308	31.1364		1.32457	3.12644	1.46687	2.31176	1.40344		1.85008	3.05578	3.44619	3.06391	1.03495
28.1526	36.8511	44.9319	48.0701	44.7382	31.7315	37.1156	51.8912	63.8213	55.6522	43.8766	31.5623		1.32458	3.26124	1.46745	2.31335	1.40348		2.32621	4.20443	3.44636	3.06398	1.03506
29.4513	37.5628	44.018	45.3794	41.1362	31.6152	36.8383	51.2002	62.6007	55.5766	45.138	31.2781		1.32463	2.82959	1.46916	2.31413	1.40356		2.21729	3.97736	3.4465	3.06399	1.03518
27.9584	38.942	48.4329	48.4142	43.6815	30.971	36.566	51.4911	63.7854	51.2215	42.706	32.5608		1.32473	3.76242	1.46934	2.31427	1.40357		2.3525	4.29032	3.44652	3.06403	1.0352
32.8751	35.9634	41.864	47.6647	40.9352	30.0322	34.1707	44.8341	51.7486	53.5515	42.6789	30.2924		1.32476	2.53908	1.46992	2.31453	1.40377		1.84652	3.04384	3.44665	3.06432	1.03522
28.2263	35.9983	41.6867	43.3442	46.1677	31.714	34.5845	43.7984	48.7944	52.5441	43.1636	31.2911		1.32488	2.48041	1.47001	2.31469	1.40384		1.54943	2.38957	3.44674	3.06438	1.03529
33.4602	40.0005	49.1351	49.5835	42.9191	29.782	34.0689	43.9144	49.7955	61.6385	45.4688	31.0477		1.32497	3.18239	1.47101	2.31596	1.40385		1.67558	2.67648	3.44696	3.06443	1.03582
30.8497	39.3701	46.0164	44.1749	41.7377	32.4166	34.3716	44.9592	51.7334	58.5749	45.2403	32.7825		1.32521	2.78561	1.47183	2.31671	1.40393		1.82332	2.98992	3.44725	3.06448	1.03589
30.7983	40.7907	46.2473	38.2961	43.0155	31.9556	34.2319	43.4632	48.5453	60.6198	46.2259	31.3893		1.32538	2.39839	1.4725	2.31693	1.40405		1.56435	2.42557	3.44726	3.06449	1.0359
29.6924	42.3967	50.855	43.9303	40.2768	31.0641	36.038	47.2691	54.5416	51.8693	45.6836	32.6107		1.3254	3.15254	1.47252	2.31693	1.40418		1.79805	2.96235	3.44727	3.06449	1.03601
25.5145	37.3617	43.1547	48.8638	41.1949	32.139	33.9472	47.1723	57.664	53.6896	42.7288	31.909		1.32545	2.5392	1.47278	2.31698	1.40421		2.22736	3.99435	3.44741	3.06468	1.03605
31.4295	35.8239	39.6267	41.8027	42.3837	31.2924	33.5963	46.7353	57.1916	55.9479	47.9668	30.1829		1.32555	1.84787	1.47377	2.317	1.40421		2.21399	3.97594	3.44782	3.06469	1.03615
28.915	35.1631	38.942	50.5199	36.4799	30.0675	35.2132	48.3963	58.5132	56.0397	45.904	32.3933		1.32556	1.86231	1.47387	2.31727	1.4043		2.12848	3.7619	3.44783	3.0647	1.03618
30.3128	36.3021	42.059	49.6504	35.6686	31.276	34.7434	47.3511	56.7705	58.2469	44.3095	31.0464		1.32558	2.46124	1.47393	2.31774	1.40447		2.14353	3.74498	3.44785	3.06484	1.0362
27.7493	35.0314	39.4225	48.1919	40.1561	31.0591	34.6577	44.2198	49.6327	56.8669	45.785	32.1898		1.32582	1.99272	1.47404	2.31775	1.40454		1.65279	2.5884	3.44798	3.06508	1.03621
29.0752	31.5328	35.5037	46.481	28.1076	30.2304	36.0911	49.4907	59.7009	54.0508	43.321	33.3611		1.32582	1.92627	1.47407	2.31782	1.40471		2.19256	3.86325	3.44802	3.06517	1.03623
33.5088	38.9802	44.7461	47.4833	39.2108	32.5433	37.6286	52.2506	63.8261	53.0608	47.0038	30.4172		1.32584	2.4569	1.47412	2.31813	1.40494		2.33169	4.17757	3.44805	3.06522	1.03627
25.0291	40.0573	47.4279	45.3623	33.5245	31.1499	35.518	46.1822	52.8244	54.3371	45.9552	32.083		1.3259	2.94713	1.47465	2.3183	1.40519		1.75131	2.84213	3.4482	3.06528	1.03628
32.1132	37.5348	45.1275	47.9026	41.4018	31.235	39.4375	51.9361	60.1676	57.4981	46.5221	31.6087		1.32597	2.92444	1.47472	2.31853	1.40531		1.8827	3.12264	3.44842	3.06537	1.03636
30.4523	36.8379	41.3282	35.1126	43.1752	31.7378	35.7765	46.7786	53.806	55.3147	44.0958	31.295		1.3261	2.12591	1.47702	2.31882	1.40553		1.76904	2.89898	3.44847	3.06541	1.03639
29.4601	42.9932	51.3713	47.4538	41.0648	31.0143	37.0032	49.4856	58.2175	56.9611	44.603	31.5221		1.32635	3.11298	1.47716	2.31882	1.40566		1.98988	3.38185	3.44873	3.06566	1.03652
31.4416	38.0058	45.3542	49.898	44.5945	31.5107	34.833	46.4952	54.5958	53.6791	44.5621	32.201		1.32657	3.07189	1.47738	2.3195	1.40567		1.98575	3.36507	3.44894	3.06572	1.03665
26.6853	34.6768	38.7623	44.9692	42.6849	31.8671	35.2006	46.0763	53.0566	52.7515	45.0528	30.3311		1.32663	1.88556	1.47834	2.31958	1.40568		1.78494	2.93056	3.44924	3.06574	1.03672
31.3459	43.0223	52.5042	49.6691	41.9671	31.0014	35.0036	47.4413	56.5633	57.508	46.1957	30.8854		1.3268	3.45749	1.47882	2.3198	1.40569		2.13791	3.70589	3.44952	3.06578	1.03674
28.5267	37.5323	41.7066	53.7577	40.5709	31.6981	34.5245	47.554	57.6209	54.944	45.3491	30.6418		1.32691	1.97435	1.48008	2.32012	1.40578		2.15612	3.822	3.44955	3.06581	1.03677
26.7451	37.6239	43.5083	53.5559	34.8748	32.2207	34.3462	45.8851	53.9262	54.4662	43.8699	32.0155		1.32692	2.41367	1.48053	2.32068	1.40581		2.00757	3.40658	3.44956	3.06588	1.03684
30.6964	44.904	54.939	51.5118	43.9655	31.1029	36.1504	49.6894	60.0825	51.3206	44.1877	31.835		1.32693	3.7082	1.48136	2.321	1.40603		2.15884	3.81606	3.44958	3.06599	1.03686
28.1376	41.0566	45.4939	50.9889	25.7637	31.2313	35.4845	46.8155	54.3344	54.8397	45.0208	30.9486		1.32702	1.98541	1.48171	2.32115	1.40622		1.83054	3.04522	3.44958	3.06602	1.03687
29.0138	33.921	37.8395	35.9737	42.6343	30.28	35.1397	46.663	54.5107	53.3607	43.8909	31.8493		1.32702	1.92872	1.4819	2.32255	1.40631		1.91451	3.21834	3.45007	3.06608	1.03688
28.5686	43.2579	52.3575	51.4254	41.2141	31.0501	34.5617	44.0288	49.3415	9.29078	44.1545	31.3729		1.32715	2.98499	1.48219	2.32299	1.40636		1.62378	2.53501	3.45014	3.06613	1.03691
29.7468	41.6778	48.7876	50.0227	38.8077	30.5649	35.7974	47.4657	55.366	51.6969	44.5955	30.646		1.32719	2.86834	1.48322	2.323	1.40658		1.92619	3.23035	3.45014	3.06618	1.03709
29.9801	39.671	46.5667	49.9377	35.6638	31.6372	34.5476	45.4817	52.6732	56.0298	41.7431	31.6883		1.32722	2.73312	1.48327	2.32322	1.40681		1.86174	3.08623	3.45025	3.06621	1.03711
31.7136	39.1174	45.2325	48.9728	42.3779	32.358	36.5821	46.0541	51.0038	57.6476	44.1688	31.6096		1.32726	2.54497	1.48362	2.32414	1.40683		1.51391	2.30501	3.45032	3.06624	1.03717
30.3391	42.6675	50.1814	42.2956	41.2888	31.9091	33.9617	47.5727	58.622	52.6921	46.4441	31.5037		1.32734	3.09098	1.48407	2.32472	1.40706		2.2876	4.14466	3.45091	3.06653	1.03721
27.1414	33.7163	37.9222	51.0854	41.3683	32.5226	34.6923	45.1656	51.727	53.3894	43.2677	30.5217		1.32736	1.97157	1.48515	2.32477	1.40709		1.73675	2.8248	3.45105	3.06663	1.03749
31.6274	41.2509	46.8166	45.9904	33.5834	32.4779	34.1126	43.938	49.7851	55.9738	43.5183	30.9774		1.32742	2.29841	1.48629	2.32518	1.4071		1.67903	2.67823	3.45149	3.06664	1.03751
31.6654	41.4625	48.0051	46.2024	43.611	32.2548	38.4401	53.7847	66.2016	52.8473	47.6946	31.7801		1.32758	2.69901	1.48637	2.32533	1.40711		2.44045	4.41525	3.45154	3.06672	1.03754
33.5173	42.6396	48.9041	47.663	40.0284	31.5185	33.7061	46.5063	56.4482	51.4345	45.4964	30.7973		1.32758	2.57174	1.48789	2.32544	1.40716		2.21586	3.93691	3.45175	3.06681	1.03774
27.5558	44.328	53.9443	47.8625	37.4749	32.0043	34.9971	47.18	55.9524	55.8137	43.1259	31.5869		1.32764	3.50461	1.48844	2.32556	1.40735		2.07966	3.57712	3.45177	3.06694	1.03777
34.1214	39.2757	46.8263	47.9948	36.3371	31.8181	34.2854	45.9696	54.2208	55.0297	42.2276	32.2958		1.32769	3.1025	1.48859	2.32604	1.4074		1.97838	3.3755	3.45181	3.06703	1.03781
29.6203	36.4364	43.1362	44.758	39.522	31.6187	37.2015	49.8938	58.8663	55.673	46.5497	31.7639		1.32773	2.65163	1.48865	2.32607	1.40749		2.01219	3.43466	3.45185	3.06749	1.03815
29.1808	38.0158	42.197	50.7097	38.1698	32.1376	34.4089	47.3231	57.2544	55.7583	43.9116	29.5967		1.32779	1.99561	1.48895	2.32611	1.40751		2.1633	3.82695	3.45189	3.06753	1.03819
29.8997	37.9693	44.8456	48.0223	34.5789	31.5808	35.2215	46.9754	55.1146	56.1269	45.0665	30.8407		1.32783	2.97717	1.48919	2.32616	1.40754		1.93201	3.26987	3.45201	3.06758	1.03823
27.3039	34.7156	38.8601	55.5787	41.486	31.7716	36.0405	47.3821	54.799	53.353	49.2958	30.5337		1.32793	1.92419	1.48928	2.32622	1.40755		1.88034	3.10999	3.45217	3.06794	1.03827
32.1007	37.5147	42.0241	50.1727	46.4503	32.0726	34.6408	48.1217	58.8068	55.9496	45.9163	30.7076		1.32795	2.1206	1.48933	2.32725	1.40762		2.32138	4.16133	3.45226	3.06803	1.03836
30.8757	43.7228	52.9916	48.549	42.8254	30.6421	35.7085	48.8952	58.8972	52.6707	44.0823	31.0002		1.32796	3.49719	1.48945	2.32737	1.40771		2.19925	3.86738	3.45234	3.06809	1.03842
30.3374	45.9815	57.0995	47.1372	39.2601	31.0903	35.736	50.3965	62.5214	58.9671	44.5118	31.5564		1.32806	3.99439	1.49049	2.32744	1.4078		2.48274	4.53608	3.45273	3.06823	1.03844
26.6714	38.9698	47.7093	52.2351	42.0133	31.8313	35.6301	47.8483	56.5264	53.6758	46.8923	31.9341		1.32807	3.34694	1.49088	2.32777	1.40781		1.97397	3.37598	3.45275	3.06877	1.03851
27.026	43.1983	50.5503	47.7235	42.458	30.7994	34.9256	48.7576	59.879	53.5198	42.1648	31.4113		1.32814	2.87377	1.49118	2.32824	1.40808		2.28459	4.12149	3.45295	3.069	1.03852
28.9329	36.7764	41.8281	45.5445	40.2102	32.9029	36.1042	46.5358	52.7655	52.7689	44.1514	30.4994		1.3282	2.17075	1.49288	2.32913	1.4081		1.70205	2.71852	3.45313	3.06912	1.03857
30.3535	39.3754	47.6301	50.9461	42.8757	32.0493	36.0151	45.6126	50.8182	57.3201	42.9901	32.6084		1.32827	3.13289	1.4934	2.32928	1.4081		1.57462	2.42867	3.45348	3.06927	1.03914
30.0793	40.177	50.0025	48.7365	36.9185	31.1522	34.7633	44.5639	50.2549	52.9032	44.9548	31.5394		1.32845	3.84234	1.49429	2.32931	1.4082		1.65873	2.62193	3.45357	3.06928	1.03918
28.2374	41.0062	45.3548	35.3687	37.9701	32.3522	36.5522	47.4705	54.2335	55.0983	44.3922	32.0179		1.32846	2.1274	1.49438	2.32953	1.40826		1.77756	2.87862	3.45383	3.06934	1.0392
30.0562	44.19	54.3481	46.8679	41.4578	31.5303	35.5846	45.1657	50.4301	54.9708	45.4351	33.1685		1.3285	3.75062	1.49488	2.32987	1.40835		1.52923	2.36947	3.45384	3.06936	1.03922
34.2211	38.3194	42.7396	45.3427	38.0162	31.3023	35.775	47.6376	55.8025	58.2637	43.3277	32.0481		1.32856	2.02529	1.49518	2.32995	1.4084		2.02612	3.42069	3.45413	3.06955	1.03957
31.9626	34.7482	38.8395	52.4257	43.3514	31.589	34.0001	45.43	53.3998	53.9749	44.2191	30.9686		1.32858	1.9648	1.49536	2.33014	1.40847		1.97948	3.35973	3.45421	3.06961	1.03972
31.1251	36.5213	42.4229	48.8844	43.4434	30.6505	34.927	45.9881	53.2677	53.2814	47.7799	30.7286		1.32874	2.53078	1.49576	2.33048	1.40847		1.8369	3.04582	3.45434	3.06972	1.03989
28.2856	36.7954	40.7841	38.3296	46.4722	31.1638	33.6795	44.4997	51.7229	49.6262	43.6179	32.8478		1.32891	1.92644	1.49591	2.33094	1.4086		1.85771	3.09786	3.45452	3.06992	1.03999
31.3903	40.2271	46.6485	48.6163	35.4194	32.366	36.8374	47.0885	52.9511	53.9513	44.5161	31.3642		1.32908	2.81345	1.49628	2.33097	1.40875		1.64943	2.59275	3.45463	3.06993	1.04007
27.7177	40.4544	50.329	30.1708	43.6897	31.6447	34.8464	45.9146	53.2203	53.7921	44.0857	31.5327		1.32917	3.52936	1.49659	2.33142	1.40886		1.84036	3.05512	3.45466	3.06998	1.04008
32.927	39.0782	47.0675	47.7879	40.9354	30.9837	37.7601	50.0864	58.4443	53.2695	45.5669	32.5976		1.32923	3.00786	1.49679	2.33147	1.40909		1.97715	3.31775	3.45473	3.07005	1.04016
29.7801	37.6933	43.3889	44.86	36.9211	30.8425	34.4853	44.8446	51.3005	56.7739	43.4042	33.0162		1.3293	2.41015	1.49712	2.33177	1.40911		1.72897	2.80645	3.4548	3.07052	1.04035
30.8704	37.1149	41.7878	46.9406	41.035	30.4274	35.0818	45.4455	51.7886	56.0165	44.4335	31.2965		1.32938	2.08721	1.49779	2.33179	1.40927		1.72491	2.78064	3.45484	3.07081	1.04036
33.0577	36.0206	40.4547	53.3839	40.5422	30.1533	35.6327	49.8921	61.4537	53.7175	46.2513	30.822		1.32948	1.97043	1.49784	2.33203	1.40954		2.29096	4.1485	3.45514	3.07116	1.04039
27.3057	37.1489	41.5468	43.4453	41.9608	32.3475	34.5497	44.5015	50.4242	54.8365	47.7958	31.6579		1.32959	1.99561	1.49813	2.33257	1.40955		1.68162	2.68242	3.45531	3.07116	1.04039
33.1724	42.0719	49.1223	43.8269	41.7565	32.0036	35.3307	44.5874	49.5001	54.5081	45.4548	31.8581		1.32961	2.82102	1.4984	2.33328	1.40969		1.55302	2.37724	3.45551	3.07142	1.04048
25.4696	39.6214	45.3079	48.5712	41.5345	30.6914	34.0938	43.88	49.6811	57.9571	43.9408	30.7317		1.32969	2.52925	1.49868	2.33389	1.40971		1.69678	2.70262	3.45591	3.07148	1.04052
27.4415	41.4746	46.3365	48.6437	36.8496	32.1638	35.6023	46.1435	52.6111	58.3069	43.731	31.4186		1.32982	2.22531	1.49925	2.334	1.40972		1.74149	2.80999	3.45614	3.07153	1.04086
29.7743	37.8906	42.9365	40.3951	38.9989	30.9627	35.6779	46.6168	53.5821	54.5182	42.1064	31.1413		1.32989	2.35323	1.49944	2.33427	1.40984		1.81677	2.9736	3.45672	3.07157	1.04097
28.8715	38.2572	43.631	47.2696	41.5513	32.0277	35.3009	45.8696	52.4322	51.9082	46.3753	31.9624		1.3299	2.24728	1.49978	2.3345	1.41037		1.79554	2.91049	3.45693	3.07201	1.04101
28.1206	33.6952	37.4534	50.5109	35.4413	29.8849	36.068	47.0331	53.9534	56.1027	45.6742	30.1336		1.32999	1.85605	1.50049	2.33517	1.41048		1.76165	2.87347	3.45697	3.07208	1.04101
28.6466	43.1445	51.1332	46.6824	32.856	31.3038	33.892	46.4213	55.9333	54.7436	47.289	31.8317		1.3303	3.13492	1.50117	2.33587	1.41058		2.14949	3.78136	3.45705	3.07213	1.04103
29.103	39.8168	44.2377	44.9847	42.864	31.4426	36.8726	46.4221	51.414	53.1635	45.2053	30.5014		1.33037	1.94017	1.50259	2.33657	1.41059		1.53772	2.34152	3.45707	3.07229	1.04105
25.9562	38.6863	45.4548	51.9107	37.4757	30.5282	36.2351	49.1963	58.7582	53.8454	43.3501	30.4371		1.33041	2.74269	1.50278	2.33669	1.41065		2.07722	3.60968	3.45707	3.07231	1.04116
29.637	42.047	49.4982	32.0884	43.6794	31.7012	36.0284	48.9472	58.4984	55.2015	46.5636	30.5236		1.33054	3.0182	1.50347	2.33708	1.41093		2.15473	3.74779	3.45722	3.07236	1.04121
27.0922	41.9818	47.9169	50.002	44.9743	31.7258	33.4814	45.3437	54.0213	53.4617	44.6097	32.0856		1.3306	2.41028	1.50356	2.33728	1.41094		2.16378	3.74664	3.45736	3.07238	1.04128
29.961	38.8979	46.7813	47.1833	42.9847	31.5915	34.851	49.0212	60.6579	51.2909	43.488	31.0428		1.33068	3.12197	1.50754	2.33811	1.41106		2.42435	4.41525	3.45745	3.07239	1.0413
27.5321	41.0071	48.3424	48.5484	43.2439	31.1417	34.7277	44.8344	50.9191	60.2088	43.3678	31.9139		1.33079	2.94456	1.50785	2.33842	1.41119		1.72961	2.77092	3.45746	3.07256	1.04131
32.804	36.0946	42.5604	45.2631	43.3505	31.9601	36.4539	49.1736	58.3519	55.7826	44.8688	30.1845		1.33082	2.74648	1.50794	2.33849	1.41124		2.0632	3.55196	3.45748	3.07285	1.04135
28.1	42.7109	48.0588	34.0934	40.4034	33.5125	34.8236	47.2898	56.4932	56.948	44.7241	31.393		1.33092	2.28698	1.50986	2.33885	1.41145		2.15116	3.73929	3.45787	3.07286	1.04136
28.866	37.8194	46.9626	51.8597	44.3631	30.5298	33.3759	44.715	52.6997	57.8035	44.1712	32.9229		1.33092	3.55225	1.50998	2.3392	1.41151		1.93939	3.30506	3.45818	3.07287	1.04147
26.7545	43.241	50.4178	49.9993	44.236	31.3269	34.6569	48.5116	59.736	55.2106	43.8748	30.6214		1.33093	2.84393	1.51	2.33943	1.41158		2.34749	4.24931	3.4585	3.073	1.04147
28.5209	40.4426	46.4957	45.8865	38.5236	32.3034	36.4389	48.7082	57.2759	50.1989	46.683	30.6438		1.33115	2.60505	1.51142	2.33961	1.41162		1.98975	3.37922	3.45861	3.07303	1.04149
29.336	46.2704	56.7118	48.0009	33.9906	32.0608	35.3828	49.2073	60.2007	56.1199	43.2394	31.44		1.33124	3.75376	1.51171	2.33995	1.41169		2.23405	4.01058	3.45863	3.07316	1.04149
26.2581	36.0976	41.187	48.858	37.895	31.1773	36.5021	49.9206	60.0588	54.2921	47.0391	32.357		1.33149	2.18336	1.51275	2.34001	1.41185		2.12895	3.73744	3.45896	3.07341	1.04159
30.6435	40.4754	50.0747	48.3617	41.1321	31.0659	38.0566	50.2677	58.4093	58.051	44.1818	32.9424		1.33158	3.64995	1.51311	2.34008	1.41188		1.87892	3.13168	3.4591	3.07351	1.0416
29.3398	40.9506	49.9541	51.0328	41.745	30.7217	35.5373	48.7439	58.8152	53.1185	43.6308	31.644		1.33171	3.15919	1.51358	2.34097	1.41205		2.1992	3.87631	3.4596	3.07357	1.04185
32.0399	39.8358	44.2842	50.3158	44.2718	30.5537	36.9115	49.7549	58.9989	58.1203	44.5211	32.1452		1.33175	2.0466	1.514	2.34103	1.41214		2.08743	3.58985	3.45963	3.07359	1.04191
29.3392	40.4526	47.4651	35.3954	36.9558	30.8394	35.8695	48.3994	57.4499	53.0393	47.0415	31.9398		1.33199	2.8526	1.514	2.34127	1.41219		2.12287	3.65625	3.45967	3.07366	1.04212
29.8921	39.6391	44.841	55.0494	44.091	31.9796	36.3324	48.6296	57.2586	53.744	43.4599	32.2226		1.33199	2.14379	1.51406	2.3419	1.41262		2.00811	3.41723	3.45974	3.07417	1.04254
29.1027	38.9586	48.4259	52.3814	42.5051	32.3395	34.6195	45.0737	51.6251	53.8534	45.285	32.0522		1.33213	3.39398	1.51425	2.34227	1.41267		1.71895	2.79615	3.45981	3.0742	1.04261
24.8753	43.1167	49.1021	50.4152	40.5051	29.6999	36.9859	50.496	60.6474	52.1979	44.4611	32.0332		1.33215	2.39764	1.51443	2.34308	1.41276		2.13816	3.74475	3.4601	3.0745	1.04262
30.24	38.92	47.9033	49.0139	44.2843	32.0281	37.4232	47.3664	52.7393	58.387	44.7478	31.8722		1.33233	3.51052	1.51465	2.34457	1.41287		1.61857	2.49317	3.46038	3.0746	1.04283
30.5594	37.6554	42.6339	35.8821	42.5959	31.7843	36.5221	46.3087	51.6541	53.7789	44.2896	32.0976		1.33235	2.30787	1.51468	2.34498	1.41289		1.6459	2.54487	3.46049	3.07468	1.04287
25.4112	37.4437	44.1435	45.1743	42.2177	30.426	37.9102	51.7508	62.1458	59.7778	45.2625	31.9879		1.33244	2.82403	1.51514	2.34518	1.41304		2.17176	3.80288	3.4609	3.07494	1.04287
29.1773	39.1572	45.3983	44.0229	40.94	31.5235	37.6938	51.6551	62.2718	49.1904	42.5531	32.0153		1.33246	2.53059	1.51526	2.34546	1.41313		2.22535	3.91759	3.46102	3.07494	1.04304
28.176	42.1405	46.6326	46.5843	34.2129	30.2297	37.6713	50.8206	60.3118	53.1969	43.6984	31.4157		1.33247	2.06774	1.51552	2.34547	1.41318		2.12995	3.66736	3.46119	3.075	1.0433
25.227	39.9018	45.9894	45.4944	41.4024	31.8779	33.9839	46.8815	56.8939	56.9569	47.135	32.0113		1.33265	2.55856	1.51575	2.34553	1.41324		2.17573	3.86473	3.46122	3.07504	1.04333
28.9667	36.5126	41.4955	43.5587	39.9719	31.4247	37.7953	48.9855	55.851	57.0237	46.1467	31.1334		1.33273	2.14938	1.51714	2.34575	1.41343		1.80901	2.91888	3.46135	3.07505	1.04336
27.387	34.212	41.7823	41.2041	38.116	30.7297	32.8768	43.6779	51.0468	50.2884	46.1448	31.9721		1.33281	2.94217	1.51737	2.34587	1.41352		1.90531	3.20518	3.46145	3.07515	1.04342
28.5902	38.6887	46.6217	40.7226	41.1658	31.987	36.8589	50.5374	60.9562	53.7246	43.9034	31.7364		1.33296	3.00349	1.51854	2.34589	1.41354		2.16836	3.81997	3.46146	3.0752	1.04353
26.4341	39.7359	44.4003	42.6748	44.0624	31.1229	35.7198	45.5506	51.0991	54.364	47.0217	32.2296		1.33316	2.09944	1.51892	2.34601	1.4137		1.62907	2.54853	3.46225	3.07522	1.04359
31.7274	39.0632	46.1574	47.3573	29.0906	31.1321	36.685	50.5233	61.2109	52.778	47.1498	30.996		1.33319	2.80968	1.51918	2.34616	1.41378		2.25668	3.99956	3.46276	3.07527	1.04373
27.6212	42.263	49.578	45.6873	39.4179	31.9457	35.3743	44.6763	49.6364	57.6189	42.5806	30.8541		1.33324	2.88614	1.51923	2.34653	1.41379		1.52406	2.33673	3.46283	3.07545	1.04387
28.9533	40.879	49.2561	42.6092	40.0118	30.8647	33.8084	47.4907	58.685	53.1044	43.6852	31.5898		1.33326	2.91309	1.51952	2.34782	1.41392		2.34135	4.25694	3.46298	3.07552	1.04389
26.7016	35.133	38.902	36.0109	38.9568	30.9216	35.9812	46.9627	53.922	55.1931	45.6974	30.389		1.33329	1.78917	1.52028	2.34794	1.41392		1.8199	2.97321	3.4632	3.07563	1.04391
29.7489	43.7448	53.9478	49.4907	43.9221	32.2259	35.5406	45.2319	50.6406	52.7822	46.3914	31.0735		1.33343	3.5601	1.52048	2.34802	1.414		1.60774	2.50502	3.46321	3.07565	1.04421
29.5424	40.3771	48.1944	40.1965	33.6139	30.7972	34.2916	45.8126	53.8413	60.0504	47.2716	31.0936		1.33372	2.98722	1.52139	2.3483	1.41403		1.92282	3.2628	3.46342	3.0757	1.04431
27.2988	37.3284	44.4673	45.1203	44.4823	30.5135	33.1952	42.2334	47.2684	57.9001	44.343	31.9674		1.33373	2.86188	1.52199	2.34839	1.41404		1.58519	2.46828	3.46352	3.07575	1.04447
27.0537	39.6748	44.3891	44.2397	44.7918	30.363	35.5315	46.8624	54.3713	57.589	44.5878	31.2338		1.33381	2.07214	1.52245	2.3485	1.41406		1.89371	3.14866	3.46417	3.07585	1.0446
25.4443	34.0301	37.6942	47.1085	45.5618	32.1451	38.6656	49.2606	55.2089	56.6067	44.9317	31.6277		1.33386	1.85539	1.52309	2.34871	1.41413		1.62296	2.53412	3.46417	3.07589	1.04472
27.6302	38.2152	45.9739	40.4279	39.3806	31.1254	34.5987	45.2809	52.132	57.0482	44.0657	31.3422		1.33387	3.27369	1.52345	2.34903	1.41422		1.77091	2.9067	3.46424	3.07609	1.04474
27.8064	36.9617	42.0582	48.6488	33.5855	32.0066	36.033	47.4711	55.0165	52.2396	45.7981	30.3036		1.33387	2.2128	1.52398	2.34908	1.41425		1.81893	3.01883	3.46444	3.07624	1.04495
28.05	38.5425	47.3875	45.0154	34.803	31.7744	34.7713	44.2291	49.4913	56.2582	46.7967	32.3938		1.334	3.38735	1.52492	2.34915	1.41427		1.60266	2.49438	3.46462	3.07649	1.04498
27.8358	39.4606	44.9399	42.5301	43.7305	30.8704	36.5738	49.9927	60.1142	54.8476	42.8157	31.2474		1.33407	2.46084	1.52506	2.34926	1.41427		2.16249	3.79359	3.46467	3.07652	1.04506
27.1905	36.2742	41.4591	39.8746	42.1927	31.5681	36.4728	49.7793	59.7672	53.5418	46.6	32.4561		1.33428	2.30835	1.52529	2.35032	1.41453		2.1426	3.75084	3.4648	3.07656	1.04509
27.5479	38.0123	42.2684	49.6537	33.9779	31.542	37.3358	48.6745	55.8229	55.6912	44.1446	31.9308		1.3343	2.05236	1.52607	2.35086	1.41468		1.75505	2.8615	3.46481	3.07665	1.04528
25.8255	42.1945	50.4968	44.7454	37.3153	31.7936	37.4855	51.4174	62.0427	57.9559	44.9503	30.6501		1.33433	3.13646	1.52669	2.35122	1.41483		2.20353	3.88408	3.46515	3.07714	1.04549
30.1873	39.6001	46.3688	44.8683	34.5134	33.0614	35.1843	46.9932	55.2149	54.7824	44.4122	29.9433		1.33433	2.66364	1.52701	2.35134	1.41484		2.00057	3.39341	3.46527	3.07735	1.04551
26.429	38.2738	45.514	52.1961	48.1807	33.1857	35.1176	45.8435	52.6459	55.559	46.0285	32.6206		1.33444	2.8993	1.52819	2.3517	1.41517		1.79517	2.93367	3.46533	3.07738	1.04559
25.5466	43.5593	53.5982	54.0754	38.5957	31.7017	35.1931	45.9811	52.8487	52.9131	43.0985	29.5784		1.33449	3.80828	1.53004	2.35188	1.41518		1.84884	3.02582	3.46536	3.07742	1.04563
32.9992	41.0381	48.7459	46.0801	42.5457	30.6727	37.366	52.1597	64.0512	57.1862	45.0527	31.6499		1.33452	2.99338	1.53014	2.35197	1.41526		2.32518	4.19422	3.46595	3.07768	1.04578
31.2327	39.0002	45.5734	46.1623	44.0878	30.4306	36.944	49.2856	57.8404	55.7911	42.3628	32.8552		1.33459	2.82927	1.53017	2.3521	1.41529		1.98674	3.36387	3.46599	3.07792	1.04585
25.8974	40.5715	47.839	52.5418	43.6576	30.6042	38.3932	49.196	55.4549	57.1153	45.5442	32.2881		1.33467	2.89229	1.53053	2.35236	1.41536		1.69573	2.67819	3.4663	3.07801	1.0461
33.1774	41.8136	49.1756	47.7667	45.6721	32.7745	36.3543	45.8538	50.8778	55.2682	46.2887	30.8898		1.33473	2.77738	1.53114	2.35283	1.41541		1.55324	2.37471	3.46633	3.07804	1.04612
29.4339	39.8356	47.852	49.3862	39.4216	32.4186	34.7278	48.785	60.2878	53.3107	45.7475	30.7131		1.33475	3.23164	1.53221	2.35327	1.41549		2.42968	4.41786	3.46641	3.07822	1.04614
28.7505	41.1766	49.0826	47.2736	24.9119	31.753	36.2708	49.2489	58.8262	53.9663	44.1727	31.0474		1.33477	2.99069	1.53296	2.35362	1.41551		2.09016	3.63261	3.46654	3.07849	1.04616
28.7994	34.377	38.0725	50.174	34.4016	32.1233	34.0935	46.3156	55.3499	58.5936	43.0111	31.6621		1.33479	1.85486	1.53302	2.35419	1.4156		2.13481	3.71281	3.4667	3.0786	1.04686
27.7229	40.7881	49.777	44.3728	29.9974	32.3693	34.8725	46.6091	54.8015	56.3173	47.292	32.9206		1.33479	3.51933	1.53326	2.35427	1.41568		1.97472	3.35312	3.46675	3.07886	1.04688
28.3517	36.2354	40.9131	32.668	41.2617	31.3693	36.7103	48.5107	56.3924	54.7222	46.1471	31.7755		1.33479	2.06452	1.53327	2.35439	1.41571		1.86415	3.10926	3.46737	3.07896	1.04702
31.079	34.1026	38.8471	54.2777	36.8045	31.3329	33.3054	45.5796	54.8733	54.5508	48.4645	31.8196		1.33484	2.19017	1.5334	2.35477	1.41572		2.13272	3.74755	3.46737	3.07924	1.04709
30.965	41.7982	47.3464	46.635	41.7896	32.4497	35.618	48.2164	57.4188	57.9097	44.9679	31.4109		1.33489	2.30593	1.53371	2.35515	1.41603		2.14472	3.71132	3.46743	3.07936	1.0471
29.6967	38.7511	45.3257	49.0516	32.0151	32.6792	35.3177	45.3324	51.187	52.8714	43.6908	31.3416		1.33489	2.49702	1.53483	2.35517	1.41628		1.63387	2.58902	3.46746	3.0795	1.04712
31.2461	36.2928	41.9654	47.658	44.458	32.4096	38.5386	50.7028	58.6815	54.0826	43.5856	31.9475		1.33495	2.43081	1.53564	2.35592	1.41638		1.92292	3.18421	3.4676	3.07951	1.04713
30.8032	41.9824	47.9958	51.6016	42.0826	31.4951	36.0368	50.3424	61.8665	54.6633	45.1947	32.124		1.33503	2.44371	1.53573	2.35636	1.41662		2.33372	4.21369	3.46806	3.07958	1.04721
29.944	38.0911	42.8183	48.8851	44.3418	32.5628	32.7366	45.8698	56.5397	59.4933	43.2359	30.4397		1.33516	2.16415	1.5359	2.35665	1.41672		2.27568	4.12454	3.46844	3.07958	1.04725
28.337	37.365	43.0156	41.8327	45.5691	30.5021	36.5661	50.3353	60.9537	54.2335	45.3311	31.4969		1.3352	2.39537	1.53599	2.35742	1.41676		2.24088	3.96899	3.46849	3.07968	1.04734
35.1619	34.9095	40.3993	35.6084	40.423	31.0763	36.9523	48.3541	55.6621	57.0047	43.2338	32.2225		1.33544	2.2686	1.53721	2.35812	1.41676		1.81457	2.97763	3.46865	3.07971	1.04746
33.175	36.7543	40.7174	46.2555	43.9363	31.6711	36.8914	47.4649	53.7222	54.128	47.0339	32.398		1.33549	1.80837	1.53774	2.35868	1.41691		1.7157	2.73103	3.46876	3.07983	1.04748
35.2742	38.4297	43.6901	49.3098	34.6227	32.3289	36.106	47.4908	54.9508	52.9356	44.2387	32.5661		1.33557	2.26532	1.53786	2.35922	1.41701		1.80828	2.99317	3.4688	3.07983	1.04762
27.793	43.972	54.0092	49.3694	35.4965	32.5447	41.7361	58.8692	73.0464	54.4969	43.585	30.9399		1.33562	3.41575	1.53814	2.35923	1.41735		2.36823	4.32788	3.46883	3.07987	1.04767
26.7947	37.6346	45.733	49.6351	40.6542	32.5502	36.7423	48.9683	57.4114	51.3018	45.4063	30.8633		1.33577	3.0287	1.53815	2.35927	1.41741		1.95246	3.3008	3.46895	3.08012	1.04791
28.3793	35.386	41.6826	35.4247	33.8681	31.5204	34.3028	45.7719	53.7281	55.2054	44.2647	32.3291		1.33581	2.61438	1.53939	2.35972	1.41751		1.97945	3.35263	3.46919	3.08027	1.04794
25.971	34.4385	39.1566	47.3619	39.2445	31.9789	36.0324	48.0278	56.3152	52.5474	43.6925	31.6205		1.33602	2.15708	1.53978	2.35984	1.41752		1.92995	3.26334	3.46927	3.08057	1.04807
30.3355	35.8147	41.9687	45.7021	44.8054	30.7142	36.1825	45.9992	51.4441	56.0116	45.9315	31.7305		1.33614	2.44427	1.53978	2.36	1.41754		1.61554	2.51161	3.46928	3.0808	1.04815
28.9985	41.6245	48.5839	46.3789	40.538	31.7732	34.4609	48.5187	60.0931	54.8303	45.3162	31.7247		1.3364	2.84431	1.54084	2.36084	1.41758		2.38603	4.35057	3.46929	3.08084	1.04826
27.2046	39.4826	45.2804	46.5455	42.1986	30.6788	34.9739	48.1381	58.2866	54.7226	43.2312	33.524		1.33643	2.54624	1.54101	2.36099	1.41769		2.17853	3.85798	3.46949	3.08096	1.04833
30.6911	37.5229	44.7627	49.3491	36.975	32.4695	37.7029	52.2208	63.6277	51.6024	45.1284	32.439		1.33649	2.818	1.54216	2.36132	1.4177		2.22556	3.97421	3.46951	3.081	1.0485
26.3766	36.6016	40.6705	46.8004	39.7713	30.7733	34.3585	45.1184	52.1204	57.7957	44.9579	30.6893		1.33658	2.00227	1.5439	2.36145	1.41777		1.77095	2.92339	3.46956	3.08109	1.04851
27.8967	38.4438	43.3417	53.4506	44.0912	31.6665	35.6805	47.6904	56.0745	51.9577	45.858	32.8434		1.33664	2.36341	1.54426	2.36146	1.41788		1.98374	3.36859	3.46975	3.08136	1.04857
32.5032	35.6077	40.8127	42.947	39.3355	31.7334	32.9748	42.6043	48.4238	58.5836	42.3751	32.1655		1.33668	2.39854	1.54477	2.36153	1.41799		1.70134	2.72954	3.46996	3.08142	1.04859
31.0084	34.9509	39.4442	48.6554	37.9102	31.692	35.2413	45.5148	51.7117	56.1176	45.0411	30.8197		1.33685	2.15157	1.54488	2.36246	1.41818		1.72742	2.76937	3.47003	3.08156	1.04866
29.0985	41.1597	46.9153	50.6028	46.8547	31.2132	34.8342	44.5883	50.2078	53.0566	43.3765	31.5863		1.3369	2.45845	1.54492	2.36247	1.41833		1.63424	2.57575	3.47017	3.08165	1.04875
30.3576	42.6016	48.742	52.783	36.4049	31.6247	35.9202	46.3055	52.5123	59.1394	43.4254	31.1973		1.33692	2.50524	1.54508	2.36292	1.41837		1.76628	2.82189	3.47024	3.0818	1.04887
28.4353	41.4989	47.3758	37.6632	43.7893	32.4986	34.3622	43.4795	48.3976	57.531	44.5904	32.4115		1.33699	2.5169	1.54524	2.36333	1.41839		1.49937	2.30814	3.47026	3.08186	1.04891
29.076	37.3858	43.3538	51.8454	44.7724	32.5607	34.5226	43.6578	48.5685	53.2495	43.8807	32.4319		1.33714	2.46026	1.54574	2.36354	1.41842		1.52859	2.35029	3.47036	3.08189	1.04894
32.2255	41.3881	49.2704	51.7371	38.5431	31.2481	34.8151	48.1251	58.5208	56.0548	44.4558	31.6828		1.33723	2.92415	1.54922	2.36368	1.41861		2.22887	3.96971	3.47062	3.08201	1.049
27.2583	44.3864	50.9742	42.3911	43.6113	31.6683	36.9396	47.8697	54.5711	54.7733	45.8395	30.5427		1.33736	2.56033	1.5494	2.36369	1.41866		1.75356	2.82871	3.47084	3.08202	1.04909
30.7011	42.8749	53.2618	50.782	42.007	30.7448	34.7691	47.416	56.8839	54.6427	44.3551	30.8357		1.33748	3.76836	1.54963	2.36459	1.41875		2.13375	3.73117	3.47092	3.08209	1.04928
28.4511	38.314	45.2843	36.5865	42.3899	31.169	35.1178	45.5185	51.9019	54.4448	47.8078	31.8325		1.3375	2.66683	1.5497	2.36466	1.41885		1.71183	2.76245	3.47097	3.0821	1.04929
29.9904	43.0028	47.6807	47.7917	40.6925	31.2726	35.8851	47.2728	54.7826	51.2981	44.5824	32.8091		1.33755	2.05554	1.5499	2.36519	1.41918		1.82568	3.02966	3.47119	3.08221	1.04941
26.3254	44.6298	55.2273	46.7196	45.2194	32.0487	36.0069	48.6981	57.9393	55.4746	46.8707	32.1455		1.33761	3.52255	1.54991	2.36531	1.41926		2.07341	3.58317	3.47142	3.08223	1.04942
29.3664	35.7088	41.4302	47.3728	40.0034	31.3255	34.8822	47.6596	57.2839	53.6214	45.3107	31.4401		1.33782	2.51793	1.5501	2.36596	1.41931		2.13342	3.74035	3.47145	3.0823	1.04966
26.7867	39.4008	43.735	44.8584	35.0928	30.4214	38.5199	49.7661	56.5609	52.3576	44.5404	30.863		1.33783	2.08687	1.55051	2.36598	1.41952		1.77324	2.84461	3.47151	3.08235	1.04967
35.6457	39.2354	48.6402	46.7323	40.8698	30.0928	34.0776	44.1457	50.3084	54.955	47.5045	30.4576		1.33785	3.47086	1.55149	2.36602	1.41953		1.73558	2.79796	3.47153	3.08237	1.04969
27.8466	33.4238	37.5555	50.8187	43.4892	30.3561	38.2222	53.7435	66.4769	51.0885	43.8205	31.9899		1.33787	1.96991	1.552	2.3665	1.41967		2.46337	4.48426	3.47155	3.08256	1.04972
28.2758	37.6386	43.201	45.8132	33.3958	31.0113	35.495	45.6074	51.5512	53.5861	44.5847	31.1571		1.33791	2.44926	1.55202	2.36662	1.41974		1.63954	2.6032	3.47157	3.08257	1.04973
30.9298	41.5134	50.1948	33.4045	35.2091	30.6897	35.9172	47.9205	56.2438	58.1267	45.8316	30.7779		1.33793	3.20238	1.55237	2.36662	1.41984		1.96908	3.33446	3.47173	3.08258	1.04973
30.8841	42.3896	51.2359	50.5279	42.2383	31.1762	35.5826	46.6498	53.8017	57.7165	43.3924	32.0613		1.33796	3.16269	1.55247	2.36678	1.41987		1.794	2.95332	3.47194	3.08308	1.04981
27.1837	39.1914	48.3429	38.1323	44.0667	32.2732	35.0531	46.7888	54.9405	57.7922	44.8282	31.2236		1.33801	3.42372	1.55298	2.36735	1.41993		1.93638	3.28139	3.47203	3.08322	1.04992
31.8373	35.6296	42.4644	43.3496	39.0363	31.8276	34.5256	43.5103	48.2367	56.9837	43.4636	31.1928		1.33806	2.6796	1.55328	2.36757	1.42017		1.53155	2.33722	3.47208	3.08333	1.04996
28.2849	40.695	45.2265	55.9857	43.8294	31.2989	34.6995	48.086	58.6203	55.5132	45.4069	33.1133		1.33809	2.06111	1.55359	2.36787	1.42027		2.25931	4.03724	3.47246	3.08348	1.04997
26.9845	38.9477	47.8542	44.8061	37.7884	31.9957	38.6398	48.9866	54.6329	53.7818	44.8639	31.3095		1.33812	3.39734	1.55361	2.36847	1.42048		1.56924	2.42558	3.47251	3.08351	1.05011
29.6441	38.7126	48.0391	50.8134	43.4495	30.7022	37.0396	46.6185	51.6159	52.8594	45.4093	32.5468		1.33817	3.6168	1.55435	2.36967	1.4207		1.56166	2.37641	3.47269	3.08356	1.05017
30.9311	40.905	50.1824	45.4319	41.5236	33.1162	35.9898	45.6713	50.9849	58.565	44.6488	32.168		1.33826	3.38668	1.55466	2.36968	1.42085		1.59162	2.46517	3.47272	3.08363	1.05034
30.9905	40.0547	49.2421	40.621	44.5016	31.3207	35.5355	44.7343	49.5396	56.891	44.6761	30.7114		1.33865	3.27319	1.5547	2.37049	1.42091		1.52567	2.32267	3.47288	3.08383	1.05036
32.3619	40.6322	49.5691	46.036	33.9876	32.504	37.7245	47.8385	53.3661	56.1756	45.2349	30.7187		1.33869	3.23938	1.55541	2.3707	1.42115		1.59098	2.46049	3.47317	3.08385	1.05037
30.7811	36.5843	45.22	52.994	40.2775	31.2671	34.0439	44.1303	50.3234	58.1341	46.9963	30.3761		1.3388	3.42094	1.55589	2.37073	1.42139		1.76454	2.84796	3.47335	3.0841	1.05041
24.804	40.3164	48.4075	50.8673	43.2522	30.6797	35.218	46.5778	54.1911	56.62	45.0791	30.6199		1.33888	3.09235	1.55602	2.37078	1.42145		1.96153	3.27614	3.47341	3.08415	1.05047
30.5599	46.0552	56.7815	40.9599	41.1601	30.3256	34.539	46.0912	54.1078	55.0879	45.0483	30.3306		1.33895	3.86528	1.55626	2.37084	1.42146		1.89075	3.20283	3.47342	3.08418	1.05058
32.1124	42.1682	50.0709	43.9518	34.561	31.6416	37.5857	49.0504	56.3114	53.5664	47.5531	30.4778		1.33907	3.19142	1.55675	2.37129	1.42146		1.7961	2.93364	3.47351	3.08427	1.05073
32.4101	40.4935	48.0896	49.6348	40.8996	32.3993	36.9893	51.5128	63.1087	54.8659	46.6371	29.3556		1.33907	2.92269	1.5586	2.37141	1.42149		2.3644	4.25218	3.47389	3.0843	1.05083
28.8858	44.0947	51.9368	47.4809	46.2655	31.0172	36.7362	51.3626	63.1734	58.7877	48.8171	30.9076		1.3391	2.95883	1.55889	2.37164	1.42156		2.39598	4.33073	3.47407	3.08449	1.05088
34.5953	41.7804	50.8573	46.9082	39.3701	31.2324	35.532	46.7836	54.188	51.7682	44.6926	31.1635		1.33914	3.19228	1.55907	2.3725	1.42161		1.92972	3.19961	3.47417	3.08479	1.05095
31.4025	37.8683	43.5437	46.5402	36.0224	31.3618	34.9972	47.7199	57.2401	56.8846	43.9122	31.2291		1.33928	2.45067	1.55909	2.37255	1.42174		2.11699	3.7011	3.47417	3.08484	1.05101
27.0883	39.7452	44.9532	44.2257	39.6937	32.1162	34.4528	45.6388	53.1836	52.8973	44.332	32.4634		1.33955	2.19758	1.55919	2.3726	1.4218		1.91756	3.21093	3.47443	3.08505	1.05105
25.9942	41.8484	51.0043	45.9595	40.6479	31.3561	35.1079	47.6286	56.8415	51.9568	47.5424	30.3362		1.3396	3.4326	1.55934	2.373	1.42184		2.09954	3.64441	3.4745	3.08509	1.05109
30.1302	36.4347	44.2751	48.2594	41.8176	31.1403	38.5463	51.8885	61.4461	55.1279	43.3422	31.3529		1.33976	3.03056	1.55958	2.37332	1.42185		2.01793	3.46345	3.47472	3.08509	1.05113
27.0534	39.9589	46.8267	43.272	41.8177	31.9759	34.5685	45.4689	52.6118	53.1053	43.6152	30.9699		1.3399	2.81008	1.56001	2.37336	1.42195		1.88232	3.11577	3.47495	3.08511	1.05135
28.8678	41.7087	47.1219	48.2251	38.8741	30.9192	36.943	47.0467	52.7061	53.2505	44.5633	31.5764		1.33992	2.35341	1.56185	2.37339	1.4223		1.62142	2.52962	3.47532	3.08521	1.05159
30.4621	36.6138	43.6845	35.1196	41.6018	33.7499	33.9677	47.0062	57.224	49.0247	44.4859	32.0648		1.33995	2.8958	1.56348	2.37406	1.4224		2.25852	4.02844	3.47533	3.08559	1.05168
29.3842	34.2982	40.7188	50.0876	41.8438	31.2108	35.3656	49.314	60.4915	53.6297	46.4322	31.354		1.34	2.61354	1.5636	2.37411	1.42243		2.38034	4.28781	3.47538	3.08573	1.0517
28.8475	39.6399	47.7627	51.5927	42.2581	31.6619	35.6474	50.2099	62.2135	53.8367	46.4824	31.6467		1.34003	2.99637	1.56398	2.37415	1.42258		2.41242	4.40094	3.47562	3.08583	1.05173
31.3061	37.6453	45.339	48.7658	43.206	32.0381	34.3211	44.9246	51.73	50.4438	46.6504	30.3933		1.34017	3.04214	1.564	2.37478	1.42262		1.83044	3.00521	3.47573	3.08591	1.05173
30.607	33.0458	37.1981	29.0019	42.3932	32.0563	33.9591	43.3543	48.6903	53.7083	42.9384	31.1127		1.3403	2.0401	1.56421	2.37523	1.42262		1.62016	2.54033	3.47574	3.086	1.05177
28.3166	33.3881	37.2525	52.6407	42.7958	32.2485	35.896	47.4284	55.1271	54.1414	42.873	31.0755		1.34031	1.77044	1.5647	2.37667	1.42268		1.91292	3.18993	3.47585	3.08601	1.05179
28.2952	35.6495	43.9903	38.0866	41.4035	32.5713	35.8488	48.4348	57.5671	53.7656	45.2227	31.3234		1.34061	3.28559	1.56483	2.37719	1.4227		2.12085	3.65972	3.476	3.08603	1.05184
31.5219	42.1126	49.6936	43.218	42.7165	30.9552	35.556	45.5325	51.2939	52.4439	47.6642	31.9052		1.34116	3.14396	1.56514	2.3775	1.42275		1.64481	2.59466	3.47601	3.08604	1.05191
28.0569	36.7902	41.5373	48.6538	39.5901	30.9504	37.8622	50.5406	59.3484	54.243	44.6578	29.9207		1.34124	2.08566	1.56515	2.37758	1.42279		1.99248	3.37667	3.47613	3.08608	1.05212
30.8617	39.9189	49.2099	39.3043	37.0922	31.5475	35.6677	46.9988	54.4793	56.9322	42.8335	31.6165		1.34139	3.54003	1.56546	2.37882	1.42283		1.86707	3.09968	3.47621	3.08611	1.05228
29.4351	44.3613	53.5571	50.408	42.9639	31.3683	36.147	46.7905	53.2816	55.2125	41.3827	30.5568		1.34141	3.47956	1.5657	2.37891	1.42286		1.76757	2.84556	3.47627	3.08615	1.05247
29.2482	43.8556	53.8769	47.2505	46.2723	31.6399	34.4482	45.6752	53.2755	56.8601	45.5856	31.563		1.34142	3.40525	1.56602	2.37932	1.42296		1.93386	3.24304	3.47659	3.08624	1.05253
29.2755	34.5859	41.8823	42.588	41.5248	30.3966	35.5261	50.0361	61.9945	54.3166	46.9663	31.9639		1.34144	2.90818	1.56662	2.37936	1.42319		2.42569	4.42484	3.47683	3.08633	1.05258
31.3199	37.8883	45.8929	45.3627	38.1588	31.3584	35.0532	49.3586	61.1411	52.261	43.9495	31.9541		1.34145	3.14423	1.56875	2.37936	1.42329		2.40426	4.38449	3.47695	3.08633	1.05268
34.4088	38.7859	45.2543	47.6806	41.1564	32.3111	35.8333	45.7105	51.2956	55.5708	43.7046	31.7712		1.34149	2.77941	1.56984	2.37936	1.42332		1.65559	2.59174	3.477	3.08638	1.05301
30.9448	42.4713	52.1792	51.5766	41.7419	30.3024	36.9522	47.1201	52.8574	57.3346	42.5709	32.8072		1.34157	3.73495	1.57014	2.37992	1.42357		1.67547	2.62088	3.47711	3.08638	1.05311
26.2133	36.3242	42.4555	31.4821	42.694	31.04	32.2633	42.3506	48.904	61.015	43.0353	31.6345		1.34161	2.47165	1.57097	2.38007	1.42359		1.82034	3.00296	3.47716	3.08661	1.05317
28.0303	42.0714	51.0831	53.4432	41.6352	32.6542	34.7726	46.3062	54.247	53.2613	45.1538	31.1573		1.34163	3.16326	1.57098	2.38038	1.42364		1.94411	3.28261	3.47757	3.08667	1.0532
25.8754	38.0982	43.3	50.8022	37.7881	31.761	36.0032	49.2243	59.2042	56.9521	44.2323	30.3472		1.34171	2.25181	1.57123	2.38038	1.42378		2.07541	3.64203	3.47774	3.0867	1.05338
27.0195	38.3083	42.5453	44.4004	38.55	31.634	35.1208	48.4397	58.7722	55.0022	45.3383	30.4251		1.34177	1.88444	1.57127	2.3804	1.42379		2.21094	3.92615	3.47786	3.08676	1.05367
30.7175	42.1	49.894	46.8607	40.6172	30.8991	38.0886	48.8474	55.1089	55.4458	44.6589	31.7506		1.34186	2.97941	1.57136	2.38079	1.42389		1.66889	2.64018	3.47815	3.08709	1.05385
28.9824	40.0404	48.6408	43.736	32.3365	31.075	34.7874	45.9461	53.3838	56.6559	43.9252	31.488		1.34187	3.28556	1.57344	2.38101	1.42389		1.87914	3.13167	3.47833	3.08712	1.05404
30.8021	37.7858	43.274	49.2721	35.6577	31.4492	34.6151	45.9263	53.6033	52.8778	41.6807	32.8348		1.34188	2.44717	1.57346	2.38173	1.42401		1.92113	3.22502	3.47836	3.08718	1.05422
28.1301	43.5045	54.1171	39.7771	43.5986	30.5452	35.586	47.2224	55.1254	57.3305	49.1321	31.4386		1.34189	3.79163	1.57396	2.38203	1.42404		1.96611	3.3014	3.47839	3.08737	1.05427
26.2717	34.505	39.08	51.6785	32.1586	31.2125	37.1464	51.6585	63.1976	58.5298	48.3621	33.055		1.34204	2.03031	1.57418	2.38314	1.42411		2.29437	4.11871	3.47839	3.08745	1.05435
30.5614	36.5583	40.5325	47.7988	41.039	31.1508	35.5491	47.173	55.0672	55.8846	46.0064	32.5959		1.34214	1.80493	1.57426	2.38321	1.42419		1.88891	3.17173	3.4784	3.08752	1.05437
29.8645	39.6666	47.757	49.197	39.5039	31.2271	35.2461	46.4967	53.9595	53.7044	43.7059	32.3157		1.34224	3.21285	1.57479	2.38327	1.42426		1.9566	3.25445	3.47851	3.08788	1.05439
33.828	37.8718	46.2055	54.2905	43.0014	31.4289	36.1993	48.9978	58.3429	56.0239	43.2392	31.7506		1.34224	3.20506	1.57509	2.38408	1.42444		2.12362	3.67421	3.47877	3.08797	1.05453
35.3368	40.263	50.0846	49.3187	37.14	32.6598	34.9919	46.9575	55.4342	58.6984	43.1519	31.4827		1.34244	3.72386	1.57577	2.38414	1.42446		2.0614	3.52172	3.47898	3.08815	1.05455
29.3091	43.5266	51.4042	54.2213	41.8529	30.7047	36.7137	48.8229	57.1153	54.9687	47.3923	31.0183		1.3426	3.0454	1.57625	2.38501	1.42448		1.97283	3.32383	3.47918	3.08835	1.05477
29.423	40.8228	47.5465	36.9077	31.3022	30.9365	34.8126	46.8541	55.4744	56.4572	44.0547	31.6577		1.34289	2.70356	1.57625	2.38553	1.42476		2.06549	3.54415	3.4794	3.08845	1.05479
27.1266	34.5451	39.6268	53.2623	43.8664	30.8335	33.4659	43.9025	50.6652	55.3959	45.8543	31.7535		1.34307	2.19607	1.57647	2.38561	1.42482		1.78703	2.945	3.4801	3.08853	1.05483
29.6063	35.6393	39.9655	46.8078	42.691	31.6947	35.9595	47.6875	55.6326	56.8792	45.3005	31.9949		1.34325	2.08779	1.57654	2.38567	1.42495		1.91605	3.21408	3.48037	3.08858	1.05484
29.3444	39.9382	47.3626	46.3818	42.2144	31.731	34.4813	47.5912	57.7836	54.2984	44.4835	31.9863		1.34337	2.76986	1.57666	2.38605	1.42503		2.19425	3.90017	3.4804	3.08872	1.05489
30.1659	38.4288	43.095	53.8899	40.8006	30.9019	36.0708	47.62	55.3042	54.1833	44.9864	32.573		1.34343	2.08458	1.57697	2.38607	1.42512		1.86823	3.11124	3.48043	3.08874	1.05524
29.8402	32.7404	37.2131	49.5631	44.6227	32.2665	36.1302	51.0899	63.5528	51.4799	46.3479	32.7444		1.34347	2.10985	1.57769	2.38609	1.42537		2.35143	4.31039	3.48078	3.08899	1.05551
28.6346	40.3524	49.8073	45.4306	40.1881	31.8507	33.731	46.558	56.5319	55.0978	47.3641	31.9239		1.34348	3.59975	1.57821	2.38631	1.42539		2.22505	3.95518	3.48092	3.08908	1.05567
30.9696	37.8637	41.9068	41.0348	42.858	31.8383	34.283	47.406	57.6663	53.2425	45.2369	30.0853		1.34357	2.03272	1.57835	2.38636	1.42567		2.28516	4.07182	3.48096	3.08913	1.05592
26.7043	34.7908	40.4091	49.478	42.0981	32.1892	36.242	45.722	50.7425	56.9096	43.9983	31.1247		1.34358	2.33672	1.57983	2.38722	1.42571		1.51823	2.32227	3.48116	3.08921	1.05593
29.5318	38.6207	46.1152	43.8405	44.3471	30.606	34.1864	46.7936	56.3449	53.2523	45.1589	32.1539		1.34363	2.90355	1.58021	2.38727	1.42578		2.13901	3.75952	3.48134	3.08941	1.05598
25.3394	40.1076	46.193	50.1009	36.0986	31.5365	35.2222	49.5963	61.4352	56.4477	45.0212	31.9725		1.34364	2.63514	1.58026	2.38727	1.42592		2.35497	4.29457	3.48141	3.0895	1.05605
26.7651	38.2364	47.2601	50.5189	42.1448	30.5125	35.5109	45.6407	51.6032	57.6322	44.6791	33.1024		1.3438	3.41982	1.58046	2.38794	1.42607		1.65241	2.62504	3.48145	3.08978	1.05608
28.7687	35.5685	39.6307	45.533	44.4516	32.2454	35.521	45.0574	50.2783	54.1923	45.3563	31.1041		1.34395	2.09776	1.58062	2.38796	1.4261		1.5966	2.4707	3.48172	3.0898	1.05611
26.3502	43.1917	53.5878	48.6718	37.4118	31.2271	37.4673	52.734	65.2925	56.0328	42.6524	30.4285		1.34407	3.52214	1.58067	2.38796	1.42613		2.46148	4.48631	3.48174	3.08997	1.05612
26.3178	35.3026	39.3753	53.2789	38.8203	31.6082	37.7626	48.4372	54.6551	57.2871	44.188	31.0148		1.34417	1.86221	1.58092	2.38817	1.42658		1.69573	2.68348	3.48184	3.09005	1.05622
28.8063	39.2143	47.7033	53.443	38.3772	31.9748	36.0137	48.9906	58.6263	55.3371	48.1411	29.9472		1.34421	3.22519	1.58104	2.38854	1.42667		2.09433	3.64941	3.48215	3.09022	1.05623
29.6734	41.6078	51.014	28.156	37.3927	30.4102	35.9584	47.7807	55.8521	55.3598	46.5273	30.19		1.34429	3.67106	1.58206	2.38889	1.42679		1.92449	3.23838	3.48225	3.09026	1.05623
27.476	38.863	44.5983	44.7057	45.0262	33.2332	35.219	44.8564	50.258	54.7585	45.0558	31.9361		1.34436	2.50031	1.58226	2.38894	1.42683		1.59527	2.48939	3.48276	3.09029	1.05628
29.0197	40.3864	46.747	51.1902	41.3513	30.7915	34.5715	43.5013	48.1527	56.4647	43.7043	32.6434		1.34464	2.54107	1.5829	2.38921	1.42687		1.50364	2.28686	3.48292	3.09038	1.05635
29.0469	31.7464	35.0765	53.7762	41.5776	31.4448	37.044	46.5866	51.5394	56.3846	45.08	30.5129		1.34468	1.71439	1.58299	2.38995	1.42703		1.48466	2.25521	3.4831	3.09048	1.05642
30.7392	39.229	47.4204	47.7354	43.3563	30.9377	37.2641	47.5923	53.4709	59.6145	45.2732	33.0784		1.34473	3.15438	1.5841	2.39035	1.42711		1.68701	2.64721	3.48322	3.09083	1.05661
30.5203	45.5117	53.5063	40.7081	38.8686	31.7823	34.0167	45.4671	53.461	53.0185	42.0876	32.0185		1.34476	2.89352	1.58456	2.39037	1.42711		1.90775	3.23961	3.48325	3.09086	1.05662
29.1093	36.8699	44.7947	40.9379	44.0755	31.5909	34.8349	47.3953	56.7271	53.9942	43.1668	32.1709		1.34482	3.21666	1.58503	2.39054	1.42714		2.09683	3.65468	3.48333	3.091	1.05669
29.042	41.7676	51.4818	44.0779	40.0234	31.5634	36.546	48.8614	57.4681	56.9993	43.8025	31.8406		1.34486	3.40927	1.58527	2.39097	1.42745		1.98616	3.37419	3.48386	3.0911	1.05673
31.2725	38.9302	44.2801	40.1433	42.3272	32.1451	35.6633	45.7228	51.5678	55.3368	42.8614	30.0005		1.34492	2.27586	1.58548	2.39101	1.42763		1.64042	2.59356	3.48397	3.09124	1.05678
31.3317	41.2192	49.7215	45.4598	40.6219	30.7745	36.0627	50.1708	61.4014	57.733	45.3459	31.8409		1.34502	3.32509	1.58573	2.3911	1.42774		2.27046	4.07783	3.48411	3.09134	1.05691
28.7791	36.1465	40.6208	51.986	44.6782	32.6657	38.006	50.1649	58.2482	54.7639	42.9622	31.0708		1.34503	2.08368	1.58584	2.39151	1.42781		1.88557	3.13909	3.48423	3.09136	1.05694
27.3337	40.8495	50.8191	45.7521	41.4022	31.5992	35.4344	48.8615	59.2711	51.054	46.4813	31.6387		1.34507	3.79049	1.58672	2.39157	1.42799		2.24842	3.99154	3.48424	3.09136	1.05704
33.3143	38.3488	46.5749	47.5343	41.6087	32.2744	34.5706	47.4421	57.2737	53.5977	44.059	31.0658		1.34507	2.99098	1.58679	2.39237	1.42807		2.18364	3.85156	3.48492	3.09137	1.05709
29.0874	34.8739	39.6951	47.2825	34.4045	31.7567	35.3045	49.915	62.0822	57.0304	43.9723	30.8559		1.34514	2.14267	1.58694	2.3939	1.4281		2.44573	4.48245	3.48504	3.09148	1.05711
33.5122	42.5415	48.8373	46.4151	44.2117	30.2515	34.835	44.5259	50.0662	55.3089	45.3544	31.3868		1.34517	2.53069	1.58782	2.39463	1.42823		1.63231	2.56549	3.48511	3.09148	1.05725
31.2023	38.5698	47.7723	46.9216	41.8277	31.0695	34.6393	47.3056	56.8317	51.7702	45.1645	31.4847		1.34544	3.35732	1.58831	2.39473	1.42825		2.08859	3.65937	3.48513	3.09152	1.05737
28.0315	39.2342	46.3476	39.0961	39.1385	31.2968	34.4709	46.8753	56.075	58.0182	44.0993	31.7133		1.34551	2.86197	1.58907	2.39496	1.42827		2.11024	3.67531	3.48529	3.09154	1.05745
31.395	42.8204	49.3089	40.5339	41.0537	32.3761	32.8916	44.5904	53.1779	52.8233	43.5942	31.3091		1.34554	2.55279	1.58915	2.39511	1.42832		2.05368	3.56119	3.48559	3.09165	1.05747
28.0263	39.7717	49.0344	48.7959	34.1691	31.0928	33.3528	42.0696	46.6808	55.0732	45.3752	31.1674		1.3457	3.43933	1.59012	2.39527	1.42838		1.5084	2.30635	3.48564	3.09176	1.05773
29.2133	39.4744	47.5701	52.8589	39.7471	32.2477	36.1066	47.5865	55.1715	52.6806	45.2396	31.3437		1.34582	3.35353	1.59062	2.39532	1.4284		1.82558	3.03178	3.48594	3.0918	1.05779
28.9918	40.9577	47.4269	42.6149	37.5584	30.3143	36.8785	47.7971	54.4959	55.2116	44.4587	32.086		1.34594	2.68918	1.59132	2.39538	1.42845		1.7061	2.75284	3.48597	3.09192	1.0578
33.443	45.4129	56.473	48.8364	42.9799	31.7588	33.317	44.8761	53.1739	53.259	45.3038	30.9337		1.34618	3.86187	1.5918	2.39562	1.42846		2.01827	3.4671	3.48615	3.09209	1.05781
30.9603	41.142	50.2418	50.6352	44.0063	31.0682	34.632	44.1275	49.4624	56.3733	45.306	31.9922		1.34642	3.44406	1.59208	2.39579	1.4291		1.62806	2.54276	3.48628	3.09213	1.05782
31.3938	34.6685	39.7083	40.1099	42.71	31.8428	33.6296	45.1324	53.2832	56.4257	45.6569	31.8132		1.34646	2.29085	1.59368	2.39591	1.42941		1.96473	3.35692	3.48637	3.09226	1.05801
29.3477	35.9432	41.1168	51.0498	37.5952	32.0368	37.9828	50.5882	59.2713	54.504	44.3581	29.0382		1.34656	2.26096	1.59388	2.39647	1.42942		1.94286	3.28119	3.48659	3.09231	1.05806
31.0649	39.5442	46.0053	39.4159	42.1357	32.4968	33.3854	44.3246	51.7687	53.7317	44.3481	30.7137		1.34658	2.51665	1.59425	2.39664	1.42949		1.87386	3.14902	3.48673	3.09243	1.05809
26.8412	38.9239	47.2118	52.8065	40.1345	31.3205	36.3321	46.9632	53.4021	52.0806	45.0814	31.6639		1.34662	3.12793	1.59534	2.39711	1.42964		1.79658	2.88472	3.48704	3.09247	1.0582
27.3407	40.1231	47.2521	39.721	41.521	32.978	36.309	47.3583	54.3391	54.4479	46.2536	31.2773		1.34668	2.76815	1.59545	2.39716	1.42966		1.75766	2.86812	3.48724	3.09253	1.05833
31.243	40.8917	49.3762	44.5061	40.5573	31.09	37.4072	48.0809	54.3656	54.8159	43.0092	31.5461		1.34694	3.35122	1.59567	2.39779	1.42968		1.69776	2.6974	3.48733	3.09256	1.05839
31.5547	42.1049	49.9446	47.8359	40.3969	31.734	33.7246	42.5481	47.2222	55.3629	47.5892	32.5372		1.34713	2.89631	1.59672	2.39793	1.42975		1.47694	2.25934	3.48735	3.0926	1.05841
32.3291	36.5549	41.048	47.3096	43.0208	31.2091	36.5743	49.0976	57.9801	55.6898	45.2198	30.9442		1.34755	2.07992	1.59683	2.39794	1.42992		1.90873	3.26255	3.48735	3.09263	1.05848
25.8392	42.9637	50.6568	45.0154	43.0306	31.3558	34.7308	47.9281	58.1836	54.6531	45.4486	30.3008		1.34766	3.10497	1.59699	2.39835	1.42995		2.21219	3.93125	3.48755	3.09274	1.0585
29.9425	44.7317	51.9238	52.7012	41.9508	32.2304	34.6893	48.6572	60.0389	56.1235	44.9035	31.2502		1.34766	2.78655	1.59786	2.39846	1.43016		2.3323	4.23277	3.48767	3.09292	1.05864
28.7395	37.999	45.9334	46.0542	42.0999	31.5626	35.5997	46.258	52.8763	55.1567	42.8538	32.1062		1.34776	2.99187	1.59842	2.39889	1.43023		1.76562	2.86199	3.48779	3.09303	1.05878
29.2909	35.9181	41.4915	45.4262	38.0716	31.8837	34.7314	48.917	60.6083	60.5856	45.2355	31.261		1.34795	2.53324	1.59863	2.39895	1.43066		2.38305	4.34707	3.48785	3.09341	1.05881
28.4533	38.5073	45.8518	48.2918	41.5705	31.554	38.1809	50.9166	59.7321	54.6028	44.6757	30.7429		1.348	2.79702	1.59918	2.39897	1.43076		1.97978	3.35014	3.48788	3.09342	1.05889
28.6035	42.9547	47.7522	46.3577	9.00413	31.7833	33.276	46.1659	56.3437	52.3097	45.5756	30.346		1.34806	2.16662	1.59954	2.39904	1.43081		2.26533	4.05403	3.48794	3.09366	1.0589
28.4971	37.0134	43.1249	44.0544	41.0138	31.7677	36.1096	49.5134	59.7253	51.7384	43.9022	32.1401		1.34808	2.58893	1.60021	2.40015	1.43081		2.20543	3.88566	3.48805	3.09369	1.05891
30.2801	40.4193	46.9733	48.1049	45.1672	31.0622	36.0768	48.969	58.4722	52.277	45.1741	32.0847		1.3481	2.52979	1.60089	2.40058	1.43088		2.11038	3.66598	3.48807	3.09377	1.05893
26.9519	40.6679	46.3935	47.6718	42.3708	32.238	35.8428	45.5552	50.9342	53.9767	45.2874	31.6622		1.34813	2.37071	1.60101	2.40058	1.43109		1.54721	2.40408	3.48809	3.09377	1.05897
32.2291	41.4787	51.4731	48.6787	45.4484	32.1311	35.4005	45.4242	51.2742	56.7507	46.4742	30.4376		1.34815	3.73582	1.60164	2.40068	1.4312		1.65035	2.61353	3.48817	3.09379	1.05897
32.6298	42.2793	51.2198	49.1886	39.4704	31.0461	38.3859	49.2723	55.6376	55.0739	43.9438	31.7971		1.34816	3.29754	1.60228	2.40094	1.43127		1.67765	2.65858	3.48847	3.0939	1.05898
35.7399	45.7869	56.9409	39.1841	43.4077	31.0248	34.9106	45.869	53.017	55.5323	44.092	31.432		1.34831	3.88101	1.60267	2.40098	1.43128		1.91163	3.15855	3.48857	3.09393	1.05911
27.7449	34.8931	42.7066	49.3446	40.714	32.2241	35.9781	49.5499	60.0318	52.5014	48.1567	32.006		1.34838	3.03291	1.60282	2.40167	1.4314		2.21971	3.93406	3.48862	3.09403	1.05923
27.1973	37.5068	41.9248	41.5672	45.8873	32.2767	35.5408	46.0393	52.4644	54.3992	45.622	32.0504		1.34846	2.09063	1.60302	2.40184	1.43147		1.7149	2.76441	3.48865	3.0941	1.05927
32.2678	43.1215	50.7761	47.7647	42.4119	33.2613	34.9672	45.2751	51.5693	54.1535	47.2164	31.0087		1.34858	2.951	1.60333	2.40187	1.43154		1.72033	2.77081	3.48871	3.09415	1.0593
27.7692	37.1866	43.4435	50.6221	31.6033	31.4069	38.6998	49.6987	56.1454	58.0869	42.6709	30.5498		1.34859	2.66723	1.60334	2.40234	1.43157		1.73968	2.75936	3.48887	3.09438	1.05932
29.4461	37.9775	42.8747	41.7202	46.4813	31.7664	34.1553	47.8764	59.0364	55.229	43.0778	30.746		1.3486	2.13547	1.60351	2.40303	1.4317		2.30517	4.18006	3.489	3.09449	1.05957
27.986	34.8141	40.2334	49.2476	42.3717	31.6041	34.4777	48.6161	60.3054	55.6153	42.4383	30.4507		1.34867	2.25875	1.60492	2.40309	1.43198		2.37888	4.34568	3.4892	3.09451	1.0597
28.1694	40.5711	48.7464	40.6578	43.4813	30.7112	34.3754	44.3546	50.3458	60.8115	43.7675	32.1023		1.3487	3.0935	1.60518	2.40373	1.43213		1.72867	2.76652	3.48921	3.09456	1.05977
30.6012	45.4194	56.4558	48.1312	41.2219	31.6819	35.6948	47.9487	56.6609	51.939	44.9583	31.1693		1.34889	3.8141	1.60525	2.40382	1.43223		2.01118	3.44107	3.48926	3.0946	1.0599
29.7956	36.7154	43.0278	39.1432	40.6922	31.5388	35.6179	47.6334	56.0388	55.0846	45.3984	31.4004		1.34896	2.49932	1.60541	2.40389	1.43224		1.96599	3.34129	3.48928	3.09486	1.05999
30.7888	41.0689	48.2198	47.7121	40.6394	29.1533	33.3058	43.615	50.2442	55.0332	43.7625	31.7358		1.34901	2.81762	1.60577	2.40442	1.43225		1.74305	2.8639	3.48948	3.09488	1.06003
27.8518	45.2525	51.8223	52.3437	33.7371	32.2556	38.1239	53.8138	66.8228	55.4545	42.5127	31.4486		1.34914	2.6073	1.60591	2.4046	1.43233		2.4845	4.54447	3.48956	3.09489	1.06015
27.2315	43.5494	51.6689	47.1687	44.3986	30.8129	33.7914	44.0895	50.6056	59.0261	45.0429	30.6747		1.34922	3.1824	1.60605	2.40485	1.43242		1.76309	2.87867	3.48994	3.09508	1.06018
31.487	32.5617	37.259	41.531	34.1192	31.9119	35.7153	47.0058	54.423	54.991	45.4063	31.9254		1.34925	2.04552	1.60765	2.40492	1.43252		1.88128	3.11718	3.49016	3.09525	1.06023
30.5687	40.4026	46.3952	45.592	42.126	31.6282	37.1268	51.0663	61.7897	59.3331	43.7836	31.3233		1.34965	2.48576	1.60797	2.40517	1.43258		2.22379	3.93451	3.49016	3.09541	1.06031
29.5883	40.3311	45.589	44.5386	43.2055	31.6802	34.3631	47.7558	58.3842	58.5682	45.4574	29.4029		1.34965	2.19219	1.60856	2.40537	1.43264		2.2616	4.05638	3.49025	3.09546	1.06037
28.5166	39.1899	46.6094	45.3865	42.9814	30.1933	40.2826	56.7392	70.3045	52.9205	45.9894	32.4593		1.34966	2.9986	1.60882	2.40592	1.43269		2.44059	4.45239	3.49034	3.09566	1.06042
32.9405	39.7729	48.2494	45.5377	41.0144	31.7892	36.7619	49.7843	59.3089	55.2077	45.1371	31.9086		1.34969	3.23464	1.60918	2.40641	1.43282		2.10284	3.64087	3.49047	3.09567	1.06046
28.9612	37.3107	43.214	50.216	38.7181	31.1457	36.2997	47.8519	55.492	55.3095	45.0966	30.3107		1.34969	2.41662	1.6102	2.40646	1.43306		1.88746	3.13572	3.49063	3.0957	1.06058
30.1817	32.5535	36.1134	55.1097	45.6925	31.6734	36.0229	50.2383	61.6348	58.3225	44.0138	31.3568		1.34985	1.85057	1.6103	2.40663	1.43308		2.35863	4.24954	3.49068	3.0958	1.06058
27.3798	42.8679	50.4434	51.625	36.0817	31.9369	33.5998	46.719	57.1459	57.6787	45.0099	30.3556		1.34992	2.76077	1.61061	2.4068	1.43317		2.28886	4.108	3.49072	3.09584	1.06059
29.4378	36.0365	40.4656	50.9544	42.4907	32.1693	35.4587	50.0031	62.0305	56.8054	46.0903	31.7636		1.35024	1.97575	1.61134	2.40777	1.43319		2.44021	4.45813	3.4908	3.09593	1.0606
34.4511	44.5227	53.5696	48.1995	16.2262	30.7601	33.4455	43.0623	48.7742	55.3341	47.6207	32.5335		1.35029	3.28123	1.61195	2.40824	1.4334		1.68852	2.69143	3.49088	3.09638	1.06065
31.0437	38.6917	44.2023	49.2038	44.7243	31.979	34.7492	49.1139	61.0659	52.3654	47.2616	31.1345		1.35035	2.31261	1.61261	2.4083	1.43346		2.35873	4.32127	3.49108	3.09642	1.06068
29.0795	37.4921	42.3989	48.2795	40.5436	31.3265	34.5566	45.4742	52.642	55.5862	44.0656	30.6888		1.35038	2.00436	1.61265	2.40852	1.43363		1.89099	3.1325	3.49114	3.09661	1.06072
30.5703	40.8164	49.7044	46.0529	29.4424	32.929	35.3063	44.8609	50.144	56.0878	45.6419	31.2876		1.35038	3.50368	1.61321	2.40877	1.43367		1.57308	2.44288	3.49172	3.09666	1.06076
27.5682	40.2272	49.6707	40.4214	44.0865	30.6989	34.2657	47.4944	57.9106	54.9011	42.9123	30.1387		1.3504	3.65701	1.61323	2.40903	1.43379		2.26296	4.04482	3.49182	3.09667	1.06128
30.8332	47.4032	58.0288	44.7058	39.493	31.8749	39.4941	52.7891	62.0713	58.2296	44.1146	32.419		1.35042	3.53718	1.61358	2.40925	1.43398		2.02295	3.43532	3.49189	3.09681	1.06139
28.0997	42.9637	53.2934	51.2046	41.7061	31.374	35.6135	48.72	58.6319	55.5023	43.0759	32.3409		1.35054	3.82755	1.61409	2.41014	1.43403		2.19791	3.8601	3.492	3.09686	1.06141
31.36	34.9273	40.9114	48.4058	42.0001	31.9414	34.9738	45.5254	52.1315	52.6817	43.1536	31.3232		1.35064	2.48943	1.61428	2.41028	1.43422		1.8271	2.97098	3.49206	3.09694	1.06164
33.3077	42.4396	48.2622	50.7621	42.1324	33.1542	34.3788	43.6738	48.8075	54.0324	46.2497	30.4911		1.35072	2.28664	1.61593	2.41032	1.4343		1.60613	2.4932	3.49207	3.09705	1.06168
31.4402	33.0651	36.842	47.4011	45.0738	31.6667	35.8306	45.7516	51.3918	49.1675	45.6904	30.6732		1.35082	1.84629	1.61707	2.4109	1.43442		1.63917	2.57104	3.49225	3.09735	1.06169
29.2711	38.6872	47.0897	47.4095	43.8807	31.4427	34.7107	44.6295	50.4795	54.7615	45.615	32.2717		1.35083	3.29138	1.61727	2.41093	1.43455		1.70948	2.71771	3.49228	3.09752	1.06174
31.7194	40.3864	48.8571	46.5961	19.1399	31.7047	35.0912	44.0321	48.6043	58.6399	41.9399	30.4314		1.35091	3.31324	1.61727	2.41151	1.43458		1.51737	2.29332	3.49255	3.09756	1.06194
31.8076	39.6721	48.0717	50.952	45.1959	31.7535	34.3066	48.404	60.0784	56.0702	44.8808	32.7702		1.35102	3.36207	1.61759	2.41158	1.43479		2.45834	4.49416	3.49261	3.09761	1.06213
28.4101	34.4359	39.3411	48.4869	44.6506	31.5155	34.4229	45.1477	52.0903	56.3137	47.8305	30.378		1.35104	2.11115	1.61815	2.41165	1.43483		1.8616	3.0667	3.49265	3.09765	1.06229
25.4275	42.098	52.2109	52.3204	43.6481	32.7582	36.0772	46.467	52.6491	55.8214	45.373	31.7474		1.35104	3.61932	1.61875	2.41168	1.43527		1.7105	2.72827	3.49275	3.09776	1.06239
31.2139	39.9097	48.8137	43.8162	35.0688	30.8059	36.7032	47.1495	53.2824	53.3618	44.4557	33.2747		1.35105	3.27171	1.61931	2.41193	1.43544		1.65195	2.6218	3.4929	3.09798	1.06239
30.9158	39.8353	49.2017	42.8307	38.6356	30.1547	36.0264	45.4276	50.391	54.4805	43.6723	30.9229		1.35129	3.45779	1.61937	2.41237	1.43551		1.60588	2.45372	3.49297	3.09799	1.06241
28.8581	38.278	42.801	42.1034	43.4805	31.2286	37.7654	48.947	55.8074	56.799	44.1393	31.9792		1.35136	2.11622	1.61972	2.41246	1.43555		1.7869	2.88325	3.4931	3.09801	1.06242
29.5659	41.1593	48.0101	45.6752	39.0031	32.6459	36.9316	50.9245	61.7716	53.968	46.4154	30.7589		1.35136	2.80208	1.62038	2.41281	1.43558		2.21583	3.93352	3.49324	3.09802	1.06248
26.6829	33.433	38.3804	50.572	38.3981	31.9134	36.6733	49.8701	59.6574	56.1845	44.9357	31.0216		1.35149	2.14792	1.62042	2.41309	1.43571		2.14065	3.72826	3.49328	3.09805	1.06252
31.3534	37.1389	42.7476	41.8309	39.5974	31.4115	32.4955	42.5856	49.0948	58.4582	45.3824	30.3556		1.35157	2.32927	1.621	2.4131	1.43572		1.73968	2.86197	3.49336	3.09806	1.06253
30.7153	36.9611	43.4103	49.3558	35.4597	30.9064	36.5203	49.6913	59.4786	56.055	44.1545	32.1287		1.35161	2.70572	1.62104	2.41336	1.43588		2.14927	3.74638	3.49349	3.09813	1.06259
26.9623	42.9695	53.4311	45.3887	43.2916	30.9468	34.6627	47.9335	58.3109	53.6365	45.7059	32.2014		1.35182	3.94591	1.62112	2.41399	1.43594		2.29327	4.08654	3.4938	3.09817	1.06278
29.9392	40.5998	46.8008	38.5047	30.7896	30.3837	34.9794	46.2348	53.7601	53.2834	44.3029	30.8664		1.35202	2.55731	1.6214	2.41413	1.43605		1.91737	3.1993	3.49398	3.09834	1.0629
31.1711	34.0872	38.2777	41.8705	42.3765	31.1741	37.2185	52.5038	65.1562	56.0517	45.5223	29.9682		1.3521	2.00942	1.62358	2.41424	1.43607		2.50115	4.5715	3.49407	3.09836	1.06292
26.5411	39.8862	47.5202	49.599	40.7703	31.4729	33.8686	45.3504	53.4195	53.2966	45.7992	31.5365		1.35211	2.82827	1.62388	2.41492	1.43646		1.99941	3.40453	3.49413	3.09839	1.06294
25.6196	34.6995	38.5285	49.0329	40.6877	31.1542	37.5802	51.2316	61.4399	55.4454	43.7045	31.7196		1.35211	1.80523	1.62455	2.41502	1.43665		2.1706	3.79374	3.49414	3.09864	1.06297
30.5775	40.1859	46.0065	46.8564	34.5408	31.4545	34.3937	46.3957	55.0567	58.048	44.5995	30.6042		1.35217	2.4222	1.62506	2.41557	1.43684		2.0511	3.53125	3.49452	3.09916	1.06307
31.688	45.31	54.888	38.4477	45.6714	31.5186	33.4563	43.2948	49.2864	53.7239	45.8055	31.8814		1.35221	3.70566	1.62517	2.41563	1.43693		1.67901	2.70152	3.49481	3.09927	1.06308
33.5791	38.8127	44.2639	42.976	44.1655	31.1843	34.8092	47.7808	57.6962	57.8635	44.8443	31.9568		1.35222	2.49022	1.62681	2.4157	1.43696		2.12193	3.74392	3.49495	3.09934	1.06314
30.008	43.6441	50.4663	46.433	39.5174	31.3315	35.2107	46.5579	54.1559	55.9457	43.2351	31.4964		1.35229	2.62403	1.62893	2.41618	1.43708		1.90714	3.18416	3.495	3.09936	1.06316
27.098	43.5929	52.4534	50.5456	42.9299	33.2119	37.1685	48.2833	55.1764	58.9736	43.9429	32.7205		1.35238	3.24019	1.62973	2.4164	1.43734		1.80943	2.93158	3.4951	3.0994	1.0632
28.3193	43.4496	52.2321	50.953	28.894	31.5954	35.2721	48.1934	57.9264	52.8616	45.9402	30.6427		1.35248	3.15983	1.62992	2.41659	1.43747		2.17539	3.81403	3.49535	3.09979	1.0632
30.0165	43.1984	51.934	47.5071	40.604	32.6619	34.8985	46.0308	53.4103	55.2772	47.0282	31.103		1.35249	3.37602	1.63135	2.41662	1.43765		1.87515	3.11816	3.4955	3.09994	1.06362
28.8728	43.0493	49.2043	36.3801	44.2407	32.0631	34.4869	44.4895	50.4889	56.1738	45.9823	32.7716		1.35251	2.55155	1.63208	2.41672	1.43767		1.71012	2.73581	3.4957	3.09997	1.06373
27.2752	36.2026	44.8571	47.8367	40.7121	31.1987	36.2728	47.9122	55.6729	54.4104	45.0504	32.4788		1.35265	3.2562	1.63213	2.41703	1.43767		1.86669	3.11135	3.49575	3.10008	1.06377
30.5372	36.4619	41.9274	46.8481	42.9684	31.2473	34.768	45.1493	51.577	55.1406	44.9625	30.8446		1.35287	2.43998	1.63283	2.41816	1.4377		1.76916	2.86455	3.49585	3.10059	1.06379
28.3956	47.3953	55.955	36.3198	41.6832	31.4316	36.1215	48.469	57.2132	57.5419	44.7819	31.481		1.3529	3.16718	1.63303	2.41824	1.43772		2.07203	3.5394	3.49626	3.10066	1.06389
26.0533	34.0051	39.6939	45.0838	42.3751	30.9277	35.4171	47.0348	54.9489	53.9039	44.2328	32.1752		1.35303	2.41098	1.63359	2.4185	1.43773		1.91	3.21113	3.49653	3.10076	1.06399
33.9248	42.9649	50.4135	51.4727	36.8149	31.7688	40.0906	53.0296	61.7061	54.7591	43.7847	32.109		1.35327	2.84973	1.63374	2.41874	1.4378		1.94357	3.24687	3.49678	3.10091	1.06405
28.8214	41.622	51.3936	45.887	42.4245	30.3695	37.0993	51.4544	62.7788	55.3572	42.7193	32.9386		1.35354	3.64485	1.63388	2.41917	1.43784		2.26028	4.04338	3.49685	3.10102	1.06424
30.2639	38.5091	43.8764	51.2303	38.1123	32.0216	35.2246	47.4325	56.1876	57.6156	43.6136	30.7467		1.35356	2.20844	1.6349	2.41933	1.43787		2.08345	3.57764	3.49686	3.10116	1.06428
27.4592	34.5039	40.2017	50.2444	46.6292	31.4879	36.2145	50.2734	61.3943	52.9982	45.9945	31.4335		1.35356	2.36415	1.63567	2.41956	1.43799		2.29881	4.11723	3.49698	3.10127	1.06431
28.4247	36.1824	42.0476	47.6749	39.8323	32.7151	36.3471	46.2915	51.8641	52.5613	45.1649	32.0554		1.35356	2.51136	1.63836	2.41974	1.43819		1.63585	2.55254	3.4972	3.10134	1.06432
28.5317	38.1923	46.7478	52.1586	34.1428	32.3544	38.8529	53.0259	63.663	55.0689	43.1476	31.6839		1.35358	3.15466	1.63877	2.41974	1.43824		2.20999	3.86863	3.49723	3.10156	1.06435
27.1462	35.3354	41.7467	41.9883	42.2772	31.1837	36.9985	50.863	61.5112	52.2606	47.4158	33.0142		1.35365	2.66195	1.639	2.41975	1.43826		2.24436	3.96807	3.49758	3.10182	1.06436
31.114	38.1646	46.1009	47.7209	36.6627	31.873	34.105	47.0419	57.0803	53.3083	45.9958	31.3797		1.35373	3.02674	1.63935	2.42	1.43829		2.26927	4.03012	3.49791	3.10208	1.06443
35.0082	39.3716	44.6882	53.6781	33.1586	33.3749	36.2431	50.835	62.724	54.972	45.9612	32.3331		1.35379	2.22559	1.63996	2.42108	1.43831		2.32875	4.22615	3.49807	3.10217	1.0647
30.2219	40.1864	49.285	51.2237	29.849	31.3581	35.7759	46.1744	52.4258	56.7798	44.3237	32.3241		1.35388	3.48626	1.64042	2.42174	1.43833		1.65198	2.64514	3.49809	3.10218	1.0647
28.6784	42.6526	52.774	36.5636	41.399	32.3824	35.3742	49.9816	62.1253	53.8967	43.3873	30.9872		1.35389	3.74965	1.64066	2.42193	1.43835		2.41011	4.41373	3.49816	3.10219	1.06474
30.4561	38.3181	43.3078	49.3048	35.0265	30.4076	37.8052	47.4697	52.4344	56.2176	47.6084	30.8141		1.35393	2.28976	1.64212	2.42217	1.43839		1.54825	2.3436	3.49831	3.10234	1.06477
26.5844	35.5881	40.0047	49.9782	22.6939	32.0291	34.68	44.6275	50.5197	56.6403	46.6496	30.896		1.35406	2.06057	1.6428	2.42226	1.43851		1.66505	2.6513	3.49835	3.10241	1.06482
26.1799	32.6734	36.7335	48.8816	46.8463	31.0598	36.1412	49.9473	60.7233	54.3055	44.1442	32.0033		1.35409	1.99097	1.64422	2.42228	1.43867		2.29576	4.08766	3.49845	3.10246	1.06482
28.0366	33.053	37.7292	42.2626	40.9674	31.1724	34.8763	48.0441	58.2217	53.972	44.313	31.7253		1.35415	2.16928	1.64427	2.42326	1.4387		2.30934	4.09426	3.49845	3.10254	1.06491
27.8233	44.7523	54.2699	48.1911	39.689	29.5391	35.9854	46.2834	52.3671	54.9799	45.2634	31.1441		1.3542	3.2954	1.6461	2.424	1.439		1.68623	2.6824	3.49866	3.10261	1.06492
29.1324	39.1576	48.1069	51.462	43.5647	31.666	35.9562	48.348	57.1896	60.6122	45.4667	30.6568		1.35422	3.31691	1.64671	2.4241	1.43914		2.0273	3.47379	3.49867	3.10267	1.06495
33.5676	37.0729	41.4393	49.6999	38.1803	31.1416	34.6846	43.9224	48.9294	55.6152	42.3877	31.8825		1.35452	1.93115	1.64693	2.42429	1.4393		1.54925	2.38896	3.49873	3.10271	1.065
26.9812	40.415	45.2726	51.4365	40.7273	32.0345	35.9155	47.9349	56.2802	54.0639	41.6595	31.4231		1.35457	2.12888	1.64734	2.42446	1.43931		1.98845	3.36908	3.499	3.10282	1.06505
28.5429	38.2239	46.8877	44.7631	34.468	31.1317	33.3687	45.3771	54.2836	56.4537	43.0521	31.9516		1.35468	3.26694	1.6477	2.42512	1.43932		2.12153	3.69504	3.49911	3.10293	1.06508
27.8095	35.5492	41.3125	47.5285	40.1986	32.6599	35.2224	45.3157	51.2877	55.863	44.3516	29.7077		1.35471	2.40686	1.64887	2.42521	1.43937		1.69091	2.69138	3.49914	3.10341	1.06525
27.8749	40.841	49.3815	52.1438	40.8986	30.81	34.4158	44.2486	50.0468	54.3876	44.1381	30.7437		1.35495	3.07153	1.64945	2.42523	1.43946		1.64623	2.61697	3.49933	3.10384	1.06525
29.1801	43.7618	54.3663	42.918	42.6949	31.6845	35.7733	45.8927	51.7919	52.77	43.1411	30.2392		1.35497	3.91315	1.65009	2.42525	1.43989		1.6793	2.65827	3.49933	3.10385	1.0653
34.9149	37.7152	45.8096	47.13	42.6743	30.9672	35.8157	44.9597	49.6488	54.3576	43.0526	31.4437		1.355	3.29459	1.65047	2.42624	1.44008		1.53484	2.3219	3.49957	3.10387	1.06537
28.681	43.3184	52.5508	48.5438	40.9124	31.4819	33.909	44.7476	51.9469	53.6721	46.7188	31.4205		1.35504	3.21496	1.65185	2.42643	1.44015		1.86729	3.10758	3.49959	3.10391	1.06553
29.0588	33.621	37.8273	43.5826	39.5043	29.7824	35.9584	49.3361	59.5476	54.772	45.6808	31.1955		1.35513	1.95777	1.65191	2.42649	1.44029		2.21083	3.89839	3.49961	3.10414	1.06554
28.239	39.4453	46.1726	39.8321	37.7109	31.3296	36.6435	49.3311	58.4222	53.5374	45.343	30.8864		1.35524	2.70237	1.65245	2.42674	1.44055		2.00425	3.44038	3.4997	3.10434	1.06554
29.6469	32.2855	36.0547	46.096	40.3911	31.5902	38.0003	51.9609	62.5029	54.4461	43.1929	30.9812		1.35539	1.83954	1.65403	2.42723	1.44065		2.2042	3.86865	3.49973	3.1048	1.06555
30.8016	34.8184	38.7922	50.8389	37.1637	30.314	34.7486	45.081	51.4499	57.9086	44.1336	32.6712		1.35542	1.95717	1.65462	2.42737	1.44077		1.70309	2.75287	3.5	3.1048	1.06562
27.9934	39.3387	45.4556	45.3709	40.4353	31.3047	36.5906	50.6042	61.5657	51.6174	42.6788	30.2331		1.35564	2.5626	1.65482	2.4274	1.44081		2.33581	4.16288	3.50037	3.10498	1.06569
29.9805	35.5855	43.4813	50.3072	41.8615	31.7334	36.9254	46.5721	51.6726	53.0676	43.5849	31.7342		1.35566	3.04682	1.65533	2.42803	1.44084		1.55221	2.37291	3.50074	3.10507	1.06576
30.3339	42.8071	50.4361	43.8666	42.1394	31.9333	34.9625	48.9189	60.2123	54.8964	44.6903	32.1247		1.35568	2.92493	1.65541	2.42815	1.44084		2.34548	4.24343	3.50082	3.1054	1.06592
28.538	36.3551	42.19	46.7053	40.4655	32.7356	34.4654	47.4549	57.4796	59.3289	45.2827	32.5952		1.3557	2.40978	1.65547	2.42831	1.44099		2.22335	3.93922	3.50173	3.10548	1.066
29.3273	38.5735	44.7339	43.699	40.2608	32.1284	38.871	52.4716	62.3098	56.135	44.8836	30.8759		1.35571	2.61875	1.65557	2.42862	1.44118		2.08643	3.59568	3.50192	3.10551	1.06601
31.0979	37.1002	41.8506	51.2284	38.4428	31.2453	33.7016	46.4576	56.3373	58.1286	45.4099	31.7808		1.35579	2.14849	1.65586	2.42879	1.44123		2.23042	3.95794	3.50194	3.10561	1.06607
26.818	38.371	43.1423	47.1202	32.3468	31.3453	37.1664	50.0162	59.2114	51.0435	42.5916	30.8297		1.35593	2.26227	1.65697	2.42953	1.44151		2.03588	3.49273	3.50217	3.10564	1.06614
29.4517	44.9025	51.1842	51.7508	41.4492	31.854	33.4516	47.0324	58.1716	53.8585	46.0137	30.8425		1.35604	2.49718	1.65754	2.42965	1.44153		2.33717	4.25416	3.50221	3.10569	1.06617
31.7083	44.6561	53.7035	49.6156	42.0804	31.8782	37.6691	49.3062	56.7744	54.7658	46.3672	31.4212		1.35606	3.18862	1.65812	2.43047	1.44163		1.82912	3.00297	3.50231	3.10581	1.0662
27.4758	40.5207	45.6103	43.2035	39.3036	30.7038	37.0838	47.8083	54.2196	59.7018	44.0178	31.449		1.35608	2.3042	1.65875	2.43162	1.44195		1.69153	2.70277	3.50239	3.10585	1.06622
28.6545	34.2288	38.2385	53.8861	40.9049	30.5831	36.5168	45.8533	50.6505	56.5391	43.676	30.8973		1.35627	1.81773	1.6597	2.43173	1.44219		1.49683	2.26591	3.50252	3.10594	1.06627
28.3891	39.1234	44.4672	45.2888	38.4026	32.4264	34.3433	44.014	49.6219	54.0391	44.9738	31.7948		1.3563	2.21348	1.66101	2.43178	1.4422		1.61188	2.54659	3.50256	3.10601	1.06629
29.631	40.3361	47.2545	49.9962	42.6624	31.8229	34.454	47.8776	58.5274	51.8356	45.5612	30.4407		1.35641	2.7241	1.66123	2.4327	1.44243		2.21123	3.96555	3.50259	3.10602	1.0663
27.7424	43.4172	49.8939	48.784	38.1934	30.1557	37.0841	49.8974	59.0612	57.5261	47.4104	32.0642		1.35641	2.57134	1.66178	2.43276	1.44249		2.04451	3.50671	3.5026	3.10605	1.06653
25.6545	41.0011	50.6855	45.9793	39.6038	31.67	36.3556	50.8457	62.5564	58.0131	45.73	30.9681		1.35649	3.76944	1.66208	2.43277	1.4425		2.35699	4.26186	3.50295	3.10607	1.06661
26.1718	44.4891	53.785	48.3864	40.8596	31.0222	34.7945	43.8631	48.6433	57.2899	43.4474	30.2796		1.35652	3.33371	1.66243	2.43302	1.44252		1.46875	2.24294	3.50306	3.10609	1.06668
33.2156	42.8415	51.7263	35.639	40.2565	30.7944	36.5592	49.8492	59.7934	52.8638	46.1136	31.5923		1.35661	3.26976	1.66386	2.43339	1.44255		2.13537	3.73317	3.50307	3.10614	1.06674
29.5531	39.6433	46.3461	54.1586	40.2897	30.5189	38.5529	54.2238	67.0897	52.8725	50.48	30.8886		1.3567	2.60478	1.66463	2.43361	1.44272		2.42576	4.41734	3.50352	3.10627	1.06678
28.4676	40.8637	50.0075	49.9525	39.5095	31.4115	36.543	51.5776	64.0402	61.4809	44.6922	32.4767		1.35676	3.40138	1.66558	2.4337	1.4428		2.37968	4.35227	3.50357	3.10633	1.06682
29.8386	41.6615	49.0317	44.832	44.6058	31.7921	35.4742	49.2958	60.2618	56.1606	45.6727	32.4808		1.35679	2.8046	1.66692	2.43384	1.4429		2.27229	4.07511	3.50379	3.10636	1.06685
28.5259	44.6194	53.4996	47.5385	42.3619	30.109	35.5903	47.6453	56.1103	55.3616	44.6969	30.7598		1.35686	3.35758	1.66695	2.43401	1.44292		2.02391	3.4451	3.50383	3.10645	1.06697
32.2949	39.3531	47.282	48.95	41.3608	31.3527	36.7148	46.1646	51.0635	54.8247	44.7515	30.6976		1.35693	2.8187	1.66722	2.43424	1.44299		1.51576	2.30156	3.5041	3.10649	1.06706
29.1763	36.5359	40.7736	47.8263	33.3761	30.552	37.6231	49.6176	57.564	57.2341	42.4683	31.1491		1.35698	2.01687	1.66727	2.43442	1.44303		1.93768	3.22141	3.50414	3.10656	1.06707
27.2782	43.534	53.4171	48.6847	43.7095	31.119	35.4692	47.3619	55.634	54.4989	43.8614	30.8413		1.35703	3.40606	1.66745	2.43454	1.44308		1.93365	3.27864	3.50431	3.10658	1.06707
28.8306	37.1669	41.1626	51.3593	42.4024	32.0001	36.5248	46.5555	52.2023	54.0079	45.3737	31.3368		1.35706	1.87164	1.66773	2.43457	1.44315		1.67944	2.62487	3.50434	3.10661	1.06714
28.5597	41.5938	49.3443	42.1876	42.2583	32.0358	35.8619	46.6773	53.4456	55.4114	45.2417	31.6888		1.35709	3.10084	1.66778	2.43463	1.44318		1.80142	2.92877	3.50468	3.10666	1.06731
25.8427	40.1125	45.8044	48.3433	47.1047	30.501	35.182	46.0724	53.0755	58.6045	41.4998	30.9587		1.3572	2.4379	1.66791	2.4347	1.44319		1.81263	2.97826	3.50469	3.1067	1.06745
29.2714	42.5158	52.8256	47.5369	41.8476	30.6436	35.6459	49.1511	59.6199	56.4811	42.9237	31.6016		1.35726	3.5271	1.66828	2.43497	1.44322		2.31745	4.11386	3.50469	3.10674	1.06753
28.8482	40.9288	48.9264	48.8867	44.1998	30.1899	34.692	43.792	48.629	54.006	43.3613	32.3799		1.35762	3.1564	1.66969	2.43498	1.44324		1.52816	2.34042	3.50471	3.10679	1.06753
28.5426	38.921	46.5024	44.5398	42.2859	31.2869	36.9521	47.6784	54.1176	50.8671	46.4154	31.5773		1.35765	2.97038	1.66992	2.43557	1.44326		1.74125	2.78655	3.50494	3.10695	1.06772
34.4194	40.7364	47.1277	45.593	43.0974	31.6886	35.7448	49.4934	60.2858	51.7292	45.0377	29.5555		1.35777	2.47005	1.67003	2.43579	1.44332		2.27475	4.0604	3.505	3.10696	1.06778
30.806	38.4154	45.8933	42.4575	41.8294	31.8374	34.1151	47.0862	57.171	55.5915	46.1039	31.0733		1.35784	3.08015	1.67079	2.43589	1.44334		2.24865	3.99692	3.50505	3.10718	1.06807
29.5916	41.7503	48.4214	48.794	42.6879	32.1128	38.0082	52.3789	63.4995	52.9079	47.1272	32.1697		1.35788	2.67858	1.67079	2.43636	1.44337		2.2455	3.98314	3.50517	3.10739	1.06811
25.037	38.6507	45.7237	37.9754	34.2738	32.5869	34.4543	46.7922	55.9033	54.0321	45.2821	31.9415		1.35797	2.77191	1.67086	2.4365	1.44348		2.13186	3.70616	3.50529	3.10741	1.06813
30.6578	41.8159	49.5342	44.2948	41.2103	32.2117	34.9893	45.7984	52.7351	52.6815	44.589	30.659		1.35811	2.89188	1.67133	2.43672	1.4435		1.78239	2.92622	3.50549	3.10745	1.06814
31.3636	40.1364	49.4835	44.9663	42.1115	32.0187	34.0322	43.4042	48.6977	54.4155	44.5502	31.1264		1.35818	3.21911	1.67155	2.43672	1.44353		1.62688	2.54576	3.50549	3.10747	1.06817
26.6178	46.8622	57.4931	45.8349	34.2664	32.0189	35.3625	47.5196	56.1743	53.8473	46.1741	32.2949		1.35834	3.42131	1.67286	2.43695	1.44359		2.09075	3.57916	3.50584	3.10768	1.06819
27.3622	43.1665	49.9981	47.3773	42.2509	31.5152	35.7245	46.6475	53.5828	58.047	44.9004	30.86		1.35842	2.77316	1.67357	2.4372	1.44361		1.77767	2.90634	3.50585	3.10784	1.06822
29.2396	41.154	47.8455	44.13	42.3253	31.6301	35.5243	48.363	57.9209	57.3698	42.2747	29.9996		1.35854	2.60703	1.67383	2.43729	1.44363		2.12048	3.69909	3.50588	3.10803	1.06822
30.4655	39.3357	48.772	41.2752	39.5097	31.2189	37.9225	51.1369	60.6605	56.4799	45.7867	30.9444		1.35872	3.56591	1.67549	2.43755	1.44365		2.09173	3.59923	3.50598	3.10807	1.06824
30.636	41.2449	47.129	51.8165	41.1553	31.9224	36.6118	46.791	52.6062	57.4592	45.4345	31.1586		1.35883	2.34289	1.67551	2.43773	1.44367		1.63575	2.57023	3.50608	3.10808	1.06848
28.1027	40.7514	46.5146	57.0295	42.4317	32.4874	35.1106	48.8772	59.8562	56.0499	46.3977	31.8119		1.35889	2.51632	1.67556	2.43789	1.44375		2.25146	4.04702	3.5065	3.1081	1.06858
29.785	39.1523	47.2924	47.8034	41.9595	30.915	34.9688	44.8712	50.651	55.7974	45.119	31.8636		1.3589	3.00432	1.67629	2.43807	1.44378		1.65883	2.62705	3.50684	3.10811	1.06865
31.5047	40.3749	46.8706	52.5904	43.9158	31.1353	33.3117	45.645	55.0205	54.5194	45.0703	31.7568		1.35892	2.57507	1.6769	2.43854	1.4438		2.15813	3.79867	3.50694	3.10814	1.06873
26.0516	42.305	51.0533	46.9578	41.6297	31.4293	35.4858	50.1458	62.3375	55.6311	44.1087	32.2925		1.35903	3.44291	1.67703	2.43857	1.44386		2.38499	4.36841	3.50704	3.10824	1.06876
26.9087	38.7463	46.551	51.1026	42.8	30.2282	32.9176	42.3243	47.8725	55.3107	44.0061	32.0794		1.35908	3.1285	1.67703	2.43963	1.44397		1.65623	2.6331	3.50716	3.1083	1.0688
26.1884	40.8403	49.3856	52.5535	38.8969	31.093	35.2025	46.7276	54.5641	54.7632	45.7991	31.3685		1.35909	3.05323	1.67752	2.43997	1.444		1.88672	3.16961	3.50736	3.10846	1.06896
31.423	42.3219	51.5613	45.8502	43.1369	31.1063	35.3257	44.4725	49.2523	54.2797	43.9739	31.2423		1.35915	3.45491	1.67821	2.44083	1.444		1.52185	2.31711	3.5074	3.10851	1.06919
28.695	41.581	47.5605	43.8264	42.0575	31.6609	33.3964	45.8338	55.3358	52.5829	43.9562	30.2775		1.35916	2.34609	1.67833	2.44166	1.44403		2.16894	3.82598	3.50743	3.10855	1.06924
31.1104	35.4853	42.5466	41.6465	38.4664	32.9121	34.7969	45.9226	53.3147	55.5277	44.5051	30.981		1.35917	2.84563	1.67856	2.44183	1.44409		1.83231	3.04972	3.50778	3.10873	1.06925
26.5241	33.9312	39.8604	48.0548	38.3647	30.9391	37.8437	52.6608	64.4639	54.462	44.8216	32.0246		1.35918	2.51507	1.67859	2.44205	1.44412		2.25716	4.05517	3.50801	3.10882	1.0694
32.448	41.1362	51.1373	42.373	42.3877	32.4556	35.7095	49.3083	59.895	58.3541	43.26	30.6739		1.3594	3.52994	1.67862	2.44222	1.4442		2.20147	3.91532	3.50806	3.10899	1.06951
33.079	40.81	45.2412	50.0069	41.5671	31.0133	39.2132	54.9746	67.7995	52.1066	48.7729	31.4227		1.35947	1.96344	1.67865	2.44293	1.44425		2.4591	4.46005	3.50823	3.10904	1.06958
30.8918	37.4887	42.127	54.9065	43.0998	31.6199	34.3757	46.9971	56.5228	56.0568	45.1805	30.6834		1.3596	2.08958	1.67866	2.44305	1.44433		2.18377	3.83193	3.50827	3.10905	1.06963
26.7222	35.3703	39.6621	50.8225	28.5977	31.7072	38.7264	51.984	61.3855	55.2313	43.6966	31.4078		1.3597	1.94996	1.67866	2.44346	1.44448		2.05889	3.51895	3.50835	3.10907	1.06963
27.6165	44.4439	51.5882	53.2168	37.8185	31.8628	36.1273	47.9201	55.9157	55.9533	43.5509	30.5087		1.35977	2.76663	1.67867	2.44395	1.44472		1.9709	3.30718	3.50864	3.10918	1.06963
27.2686	39.843	47.0767	50.9274	43.075	30.2298	34.2193	43.2668	48.125	53.8304	45.2183	31.0581		1.35979	3.02013	1.6788	2.44432	1.44475		1.55017	2.38258	3.50872	3.10923	1.06964
29.8463	39.1031	47.8751	50.3283	42.474	30.8981	35.5562	49.5934	60.851	57.4172	44.3545	31.902		1.35982	3.08704	1.6791	2.44434	1.44476		2.26702	4.08511	3.50878	3.10944	1.0698
31.7893	39.0038	46.756	46.6866	41.293	32.0228	34.1774	47.713	58.5961	56.0035	47.13	31.091		1.35986	3.10606	1.67953	2.44459	1.44487		2.3042	4.15687	3.5088	3.10951	1.06981
33.8892	38.2443	42.3848	53.8209	42.593	30.9719	34.7111	48.3724	59.301	61.1759	44.9967	31.4007		1.35988	1.897	1.67977	2.44473	1.4449		2.3218	4.17916	3.50885	3.10961	1.0699
30.8609	39.6088	47.0588	47.9889	33.7266	31.3736	35.7537	48.023	56.743	56.6748	42.1287	31.6485		1.35995	2.91592	1.67981	2.44561	1.44492		2.01345	3.44443	3.50885	3.10964	1.07001
27.594	40.5506	44.9739	45.2416	39.4014	31.2596	34.0876	45.6996	53.8966	58.7661	44.8283	30.7854		1.36005	2.11134	1.68018	2.44613	1.44495		2.00715	3.42403	3.50894	3.10966	1.07006
30.9314	41.4388	45.957	41.6767	43.3568	31.9611	35.7101	46.1536	52.4752	57.4881	44.3636	32.4322		1.36016	1.9764	1.68019	2.44616	1.44497		1.68541	2.70562	3.50902	3.10977	1.07008
29.4995	35.5091	39.4032	53.583	43.3477	31.6714	34.0577	44.9267	52.1348	57.1743	42.8116	30.8727		1.36028	1.93065	1.68025	2.44619	1.44499		1.87511	3.11865	3.50906	3.10982	1.07013
28.6025	38.6128	44.5943	44.376	40.418	30.5096	35.0402	45.3034	51.5262	55.9311	43.1656	31.385		1.36037	2.62328	1.68046	2.44622	1.44502		1.68864	2.71251	3.50927	3.1099	1.07015
27.1416	42.8139	49.8079	33.4677	41.5173	31.453	37.4175	48.0522	54.2857	53.0111	44.9135	33.7946		1.36046	2.85646	1.68054	2.44629	1.44512		1.66158	2.63551	3.50934	3.11003	1.07019
30.0117	39.0643	47.6338	47.419	41.1254	31.6558	34.7899	48.9104	60.4899	56.6474	43.9414	32.4598		1.36051	3.21212	1.6809	2.44651	1.44544		2.31546	4.21426	3.5094	3.11007	1.07022
27.2805	46.566	55.3313	50.9058	41.1537	32.782	37.7879	50.094	58.4189	51.0727	44.7662	31.7297		1.36075	3.24568	1.68093	2.44658	1.44558		1.94168	3.25519	3.50948	3.11021	1.07025
33.6069	40.9552	48.8158	49.3638	44.0959	31.0842	36.5464	50.5555	61.5214	56.1787	46.3287	31.8729		1.36076	3.14305	1.68098	2.4466	1.4456		2.28804	4.07905	3.5095	3.11034	1.07032
28.8847	41.3287	48.2909	40.5152	40.4631	31.4439	34.8306	48.1369	58.5234	54.9412	41.4778	31.7242		1.36088	2.69394	1.68159	2.44669	1.44566		2.20004	3.91732	3.50954	3.11063	1.07046
29.6146	38.7186	44.3791	43.4612	41.372	32.1582	36.873	51.8527	64.1458	54.5307	45.7635	32.5004		1.36092	2.38454	1.68177	2.44764	1.44587		2.44606	4.45342	3.50959	3.11085	1.07066
30.278	40.178	48.5848	37.5941	42.6221	30.8093	35.3026	48.2316	57.9684	53.3713	43.2769	32.666		1.3612	3.1881	1.68207	2.44802	1.44591		2.17641	3.81546	3.50968	3.11099	1.07073
30.6867	39.1843	44.7219	50.79	43.3923	31.6567	34.2458	44.4024	50.6455	54.905	45.0431	31.9592		1.36123	2.40188	1.6826	2.44866	1.44598		1.79117	2.89216	3.50982	3.11124	1.07087
30.685	40.3727	45.9484	46.7371	43.59	30.731	36.0767	49.6925	60.2129	53.7874	43.4632	31.5251		1.36134	2.3374	1.6847	2.44934	1.44603		2.21296	3.92282	3.50997	3.11129	1.07089
26.7785	40.3756	46.4479	52.3927	41.0579	30.624	37.1933	48.9213	56.6064	50.9807	46.0625	32.0503		1.36135	2.43006	1.68562	2.4496	1.44612		1.8735	3.10117	3.51001	3.11141	1.0711
27.0289	35.9834	43.2508	47.452	31.3196	31.3192	33.0693	41.6713	46.1937	56.8022	44.924	31.7242		1.36139	2.82688	1.68631	2.45035	1.44629		1.49011	2.27353	3.51016	3.11154	1.07137
27.367	35.1667	39.2913	46.6116	42.9537	31.5312	36.4161	50.9245	62.6463	56.3435	42.8664	29.4207		1.3614	1.89382	1.68724	2.45039	1.4463		2.37465	4.29319	3.5102	3.11159	1.07137
28.3739	37.5147	43.5371	53.097	45.4774	30.7314	35.9385	47.2609	54.6738	56.4657	43.7387	32.3141		1.36163	2.61149	1.68935	2.45049	1.44637		1.90053	3.14481	3.51051	3.1116	1.07138
27.2136	38.738	47.1185	47.5461	43.0302	30.0503	38.5206	48.3619	53.4132	57.8958	42.081	30.8997		1.36167	3.29644	1.68978	2.45054	1.44637		1.50726	2.28089	3.5107	3.11199	1.07173
29.5533	37.5697	43.4916	49.3001	43.9709	30.1966	35.3479	46.228	53.184	55.569	45.4529	31.4452		1.36171	2.41943	1.69063	2.45066	1.44641		1.83117	3.00189	3.51088	3.11203	1.072
28.4184	39.9477	45.8185	52.4919	43.0946	31.0946	35.1637	48.0776	57.8264	54.5096	45.8157	30.8017		1.36173	2.31559	1.69071	2.45081	1.44648		2.19184	3.84646	3.51101	3.11216	1.07222
29.8817	37.6049	42.3556	50.0424	41.9769	31.5543	34.2318	47.5262	58.0459	56.0823	45.1568	31.0357		1.36176	2.09033	1.69077	2.45081	1.44649		2.25615	4.04141	3.51137	3.11219	1.07233
28.4558	34.7447	39.667	44.283	39.3774	31.9356	36.1198	47.6682	55.3409	56.8458	44.2176	32.2069		1.36184	2.27001	1.69112	2.45088	1.44669		1.91103	3.18072	3.51155	3.11226	1.07239
31.1138	42.3433	49.9312	50.2406	33.9362	31.5726	34.7445	44.0841	49.2053	53.4026	44.7992	31.6142		1.36196	2.8751	1.69118	2.45089	1.44673		1.57875	2.44443	3.51159	3.11235	1.07244
25.6198	43.1479	51.4664	46.2091	38.9994	32.5645	36.0637	50.9835	63.4049	56.5703	42.9243	32.4513		1.36196	3.04622	1.69144	2.45102	1.44683		2.38698	4.37425	3.51162	3.11263	1.07251
29.4505	43.2434	51.959	51.7335	40.5123	33.1174	37.4819	52.0418	63.5649	52.2125	44.8646	31.9065		1.3621	3.33488	1.6915	2.4513	1.44685		2.38557	4.27357	3.51179	3.11279	1.07255
27.842	36.1672	43.3658	50.2934	39.8279	32.1933	35.8658	48.9073	58.668	52.466	42.1931	31.9063		1.36218	2.91096	1.6918	2.45136	1.44701		2.12983	3.72387	3.51188	3.11289	1.07262
31.7345	38.3055	44.2121	46.6311	38.3316	31.5683	38.1677	48.6496	54.5503	53.4113	46.4579	32.5122		1.36223	2.31099	1.69197	2.45153	1.44704		1.6103	2.5168	3.512	3.11303	1.0727
29.2212	39.3848	45.855	46.7783	39.0647	30.4512	36.1096	50.3095	61.6612	56.7523	44.7791	31.2829		1.36223	2.80525	1.69231	2.45198	1.44722		2.34722	4.22362	3.51204	3.11308	1.07275
32.8572	39.1524	48.6262	39.379	41.4339	31.1426	34.0864	43.848	49.6194	55.1634	42.5178	30.8319		1.3624	3.68249	1.69249	2.45243	1.44724		1.63873	2.60762	3.51208	3.11318	1.07291
30.302	36.6107	40.6985	47.6838	44.7333	30.4951	38.471	50.0666	57.3186	55.2692	44.5817	31.9914		1.36251	2.06715	1.69278	2.45247	1.44732		1.78577	2.90262	3.51232	3.11331	1.07294
29.2849	37.5513	41.6638	20.9039	41.34	32.8206	33.8268	44.4341	51.3459	56.5427	47.2871	32.9133		1.36251	1.93748	1.69286	2.45268	1.44762		1.81641	3.00001	3.51236	3.11333	1.07296
30.5437	35.3715	39.5225	45.6317	27.5665	31.8802	36.0364	47.3519	54.7353	53.685	44.5624	31.2045		1.36256	1.79027	1.69307	2.45291	1.44764		1.83233	3.02794	3.51238	3.11338	1.07308
27.0752	39.1304	46.7321	47.8246	31.4891	30.1576	37.2041	52.5487	65.2933	52.4523	46.1466	31.3883		1.36256	2.97076	1.69314	2.45357	1.44778		2.51154	4.5975	3.51241	3.11362	1.07309
29.5246	39.0165	46.7944	48.483	40.8071	31.4889	36.0272	46.5086	52.8165	55.5904	45.1695	31.9297		1.36261	2.89537	1.6932	2.45369	1.44802		1.7751	2.8434	3.51242	3.11371	1.07314
32.6918	44.0984	53.7177	47.1243	42.194	29.7351	36.6903	47.0341	53.0406	56.6712	42.8987	30.6351		1.36274	3.69842	1.69484	2.45386	1.44819		1.65477	2.61568	3.5126	3.11372	1.07314
26.2581	43.7922	51.0003	50.8962	43.0114	31.2141	37.7523	47.4857	52.5433	54.0554	45.913	31.7341		1.36274	2.88698	1.69527	2.45435	1.4482		1.50898	2.29305	3.51266	3.11388	1.07329
27.95	36.4272	41.1613	44.4509	44.6513	31.8655	36.0226	48.6385	57.7723	56.185	47.0805	31.8869		1.36276	2.19632	1.69543	2.45441	1.44837		2.12763	3.66801	3.5127	3.11419	1.07334
29.626	43.9933	53.5428	46.7982	39.2717	30.0477	35.8742	45.0144	49.6883	54.7284	45.2192	31.5132		1.36282	3.3851	1.69568	2.45442	1.44838		1.50257	2.27093	3.51272	3.11443	1.07335
28.4811	39.1151	47.0051	51.1134	36.9413	30.8999	35.4135	46.7578	54.3093	55.7247	44.9481	32.572		1.36288	2.91026	1.69595	2.45455	1.44841		1.8979	3.16125	3.51338	3.11451	1.07367
30.5297	36.9623	41.9578	52.2947	40.5806	31.6027	36.7905	47.9479	54.9715	55.5893	44.8142	30.5148		1.36291	2.21622	1.69616	2.45456	1.44842		1.80207	2.93648	3.51339	3.11452	1.07372
31.1552	41.9357	52.0487	36.9127	39.7299	32.3897	36.8672	51.2982	62.7911	57.4547	43.686	31.8584		1.36302	3.74116	1.69772	2.45505	1.44863		2.33909	4.20196	3.51354	3.11459	1.07383
29.5281	39.3905	44.0596	54.7864	41.0966	31.1437	35.1826	48.3368	58.4199	53.332	45.9379	33.219		1.36305	2.15499	1.698	2.45507	1.44865		2.20095	3.88806	3.51383	3.11461	1.07387
29.3591	39.4881	43.8183	51.5972	43.1817	31.5743	36.1778	48.5055	57.2102	57.9162	42.979	31.9188		1.36314	2.03298	1.69869	2.45531	1.44875		2.00182	3.41533	3.51425	3.11463	1.07393
29.7309	39.181	48.0898	48.7753	43.8467	31.1914	35.0267	46.5231	54.3591	56.7348	46.1075	31.0325		1.36319	3.25282	1.69937	2.45552	1.44878		1.97859	3.32721	3.51449	3.11492	1.07396
26.8918	41.2736	47.6293	37.662	43.7675	32.6956	35.5684	45.4364	51.0597	53.1715	43.2605	31.9882		1.3632	2.52397	1.69953	2.45576	1.44895		1.62413	2.54964	3.51456	3.11511	1.07422
32.2446	36.066	40.1062	40.6796	35.4746	31.5861	36.1492	49.0488	58.5454	57.4402	44.4621	31.0255		1.36326	1.96185	1.69966	2.45582	1.44895		2.10919	3.66196	3.51459	3.11514	1.0743
29.5238	34.1628	38.8199	50.1951	43.1236	32.2072	33.6834	45.079	53.0722	55.7204	45.1118	31.9386		1.36335	2.04892	1.70009	2.45604	1.44901		1.95713	3.32991	3.51501	3.11531	1.07443
24.6543	40.3476	46.3868	49.9272	43.948	31.9889	34.8413	44.657	50.3523	55.9064	47.7039	31.4693		1.3635	2.58466	1.70083	2.45615	1.44908		1.64176	2.59435	3.51503	3.11533	1.07469
28.3874	45.1946	54.0954	44.6461	40.4099	30.8709	35.1949	45.4372	51.6033	55.0269	45.8661	31.3482		1.36352	3.20229	1.70096	2.45622	1.44926		1.74274	2.79191	3.51579	3.11543	1.07477
28.5217	40.0614	45.3427	38.161	34.7078	31.2	34.8465	45.2424	51.6734	55.3283	45.8537	30.9935		1.3636	2.29877	1.70164	2.45641	1.44929		1.68441	2.72639	3.51593	3.11548	1.07479
27.6026	39.085	43.6693	42.9782	26.9696	31.9827	36.3493	50.9325	62.7809	51.1431	45.8384	31.1157		1.36365	2.19639	1.70265	2.45669	1.44932		2.31066	4.18801	3.51601	3.11558	1.0751
25.9191	43.6206	51.9052	48.788	41.2332	30.9953	36.1421	47.4658	54.838	55.1209	45.81	31.1546		1.3638	3.06401	1.70309	2.4568	1.4494		1.87924	3.10272	3.51613	3.11566	1.07526
28.1693	35.7906	41.9516	33.4977	37.2141	31.7763	34.5176	45.0447	51.7108	56.9322	46.102	32.2156		1.36398	2.4855	1.70361	2.45714	1.44953		1.76658	2.88523	3.51671	3.11569	1.0753
28.6717	38.6367	43.7236	47.0392	44.1485	31.5219	34.1903	47.1115	57.1063	58.4604	44.2818	30.6269		1.36398	2.23391	1.70366	2.45736	1.44973		2.18233	3.87041	3.51678	3.11575	1.07537
30.2995	33.0518	37.4139	52.8542	42.0752	31.0796	35.8065	46.4035	52.9021	56.545	44.4325	30.8733		1.36416	2.0885	1.7043	2.45754	1.44981		1.77354	2.86118	3.51683	3.11575	1.07545
26.9944	39.448	44.0069	52.5293	36.9574	31.506	35.6463	49.5534	60.5992	51.7588	47.4767	32.7252		1.36422	2.05221	1.70447	2.45777	1.44997		2.28352	4.09721	3.51684	3.11578	1.07551
28.145	37.6701	44.0204	48.338	41.9555	31.0502	34.5762	46.489	54.9866	54.3537	43.6899	30.7902		1.36452	2.60192	1.70452	2.45785	1.45003		2.0756	3.55616	3.51687	3.11596	1.07552
28.94	33.2532	37.4815	48.8474	37.7232	30.8536	35.1547	45.2261	51.1834	50.2151	43.9753	31.4652		1.36468	2.02349	1.70529	2.4579	1.45014		1.66868	2.65572	3.51692	3.116	1.07558
26.9583	43.9785	53.1282	46.2999	44.2361	32.4144	35.9738	47.848	55.9854	54.6857	43.8914	31.3767		1.36471	3.18285	1.7055	2.45791	1.45041		1.94686	3.28106	3.51711	3.116	1.07561
29.9851	38.1591	45.5516	49.9436	45.6824	31.3796	35.3255	45.2737	51.0432	53.6051	44.4148	29.6569		1.36472	2.84096	1.70568	2.45801	1.45043		1.69585	2.67937	3.51731	3.11611	1.07562
31.6006	41.4607	50.7606	52.0247	41.4668	30.2999	35.9431	45.5931	50.8765	51.4303	45.7108	30.8069		1.36479	3.43227	1.70621	2.45815	1.45059		1.57978	2.44471	3.51774	3.11646	1.07564
26.8976	35.8303	39.5991	45.9296	36.3039	30.8399	35.1251	47.2556	55.9271	53.6315	48.1667	30.6252		1.3648	1.89445	1.70721	2.4582	1.45062		2.02337	3.46978	3.51776	3.11656	1.07572
28.8019	36.9167	45.0895	47.3119	39.3851	31.7613	32.7437	42.3922	48.2812	56.9027	44.2707	31.35		1.36483	3.2136	1.70721	2.45879	1.45074		1.7202	2.77014	3.51818	3.11661	1.07577
29.0636	38.927	46.0258	46.0317	45.3209	31.1492	38.4206	49.3078	55.6675	51.9689	44.3837	31.7414		1.36484	2.82767	1.70769	2.45907	1.45077		1.70062	2.69402	3.51819	3.11661	1.0758
26.6085	42.8462	51.8752	43.8159	42.5017	31.5506	35.1077	45.3219	51.4693	50.6158	42.4673	31.6346		1.36489	3.5111	1.70795	2.45988	1.45092		1.68585	2.70046	3.51829	3.11665	1.07584
30.6193	44.5942	52.0714	48.5018	46.0979	32.0897	35.4246	46.6505	54.0432	55.6143	44.777	30.9078		1.36519	3.01862	1.70808	2.4599	1.45093		1.87047	3.10226	3.51836	3.11679	1.07584
29.3574	43.7286	54.1244	48.8925	34.9143	31.3678	34.5625	45.8038	53.3988	56.3085	45.1397	31.7413		1.36522	3.9162	1.70828	2.46011	1.45104		1.87902	3.14856	3.51854	3.11693	1.07592
31.5665	44.3395	53.7725	51.9959	39.7079	30.6916	34.3093	43.4361	48.3754	53.2602	45.6973	32.4071		1.36524	3.46844	1.70855	2.46118	1.4511		1.58584	2.44408	3.51856	3.11693	1.07598
29.1945	41.9258	51.7168	49.9166	39.5561	30.9626	35.0225	48.1886	58.3279	52.2658	44.1764	29.6627		1.36526	3.55958	1.70946	2.46123	1.45119		2.26038	4.0011	3.51859	3.11701	1.07613
28.6871	40.0397	47.6915	48.0587	44.6801	32.4464	35.1901	48.4004	58.5612	52.7954	44.5497	32.514		1.36529	3.07872	1.70968	2.46188	1.45122		2.24468	3.97123	3.51862	3.11709	1.07622
26.3351	40.6819	44.9414	45.4278	44.2987	31.3215	33.4502	43.5642	49.911	54.3086	43.3921	31.6641		1.36532	1.87722	1.70975	2.46197	1.45129		1.75323	2.85341	3.51868	3.11709	1.07625
26.3036	41.8418	51.1684	42.4783	39.8255	32.4161	36.7291	47.4367	53.8957	57.5087	44.8667	31.9286		1.36535	3.43416	1.70977	2.46207	1.45136		1.72326	2.76274	3.51916	3.1171	1.07628
31.3286	34.6541	38.2896	38.9246	41.8975	31.3155	37.2294	50.7608	60.8843	56.6161	44.9132	32.1648		1.36538	1.79635	1.70981	2.46223	1.45145		2.17606	3.80407	3.5192	3.11713	1.07634
28.039	36.582	44.1699	51.8601	38.1384	31.8273	34.2073	45.0677	52.2333	57.591	45.716	31.0985		1.36557	2.97712	1.70998	2.4626	1.45176		1.92454	3.19431	3.51921	3.11715	1.07634
28.2823	39.388	44.2542	52.6784	43.3185	31.7746	37.2442	52.5314	65.1797	56.379	48.5815	31.449		1.36562	2.08773	1.71045	2.46278	1.4519		2.438	4.45517	3.51928	3.11718	1.07675
30.4528	37.7482	43.9348	42.6934	43.7194	31.3792	34.2619	46.7202	56.0443	54.7411	45.2735	31.9196		1.36568	2.4535	1.71141	2.46291	1.45195		2.14386	3.74839	3.51928	3.11728	1.07687
27.9435	36.1205	42.1733	49.5986	40.2184	31.0157	38.0608	49.5704	56.7939	52.7572	44.446	33.1778		1.36571	2.5354	1.71157	2.46304	1.45214		1.82221	2.96583	3.51958	3.11741	1.07688
30.0027	33.5883	37.1184	52.0381	37.1334	30.5091	34.312	47.0416	56.7351	55.8202	43.8376	31.7415		1.36574	1.78869	1.71184	2.4631	1.45217		2.21445	3.90074	3.51963	3.11757	1.07703
26.0602	38.7646	45.1173	46.8652	40.3086	32.7314	33.9575	46.1165	55.095	58.0661	45.8404	32.6614		1.36583	2.68541	1.71204	2.46341	1.45223		2.16103	3.75678	3.51971	3.11767	1.07732
28.6099	39.9241	49.4606	48.6499	41.4552	32.1606	37.0427	46.6674	51.72	54.0172	43.6801	31.1023		1.36583	3.40328	1.71226	2.46379	1.45225		1.54363	2.35398	3.51981	3.11774	1.07745
30.4227	37.3141	44.8632	44.1203	40.7928	30.8731	34.9324	44.0132	48.7833	56.1194	45.5278	31.161		1.36589	2.99797	1.71252	2.4644	1.4523		1.50965	2.30266	3.51986	3.11781	1.07749
29.6046	36.908	41.3849	51.4767	42.097	31.4221	34.7764	47.7155	57.5929	51.504	44.4565	31.1389		1.36592	1.94725	1.71291	2.46457	1.45247		2.16875	3.82431	3.51993	3.11783	1.0775
30.2013	40.0092	48.2871	50.8085	42.0374	31.9829	36.7427	47.1185	53.1554	51.7663	45.5142	32.6087		1.36602	3.07103	1.71336	2.46473	1.45265		1.68205	2.66069	3.52006	3.11794	1.07751
27.6472	34.2218	38.0287	46.7496	37.7865	32.4406	36.0438	50.5845	62.4509	53.5876	44.4509	30.7031		1.36607	1.82594	1.71402	2.46605	1.45283		2.37325	4.31003	3.52013	3.11796	1.07754
26.0367	41.4972	51.1292	42.2051	41.0548	31.8687	33.6433	47.4948	58.9832	52.1731	43.421	31.908		1.36608	3.28995	1.71461	2.46622	1.45286		2.4183	4.42402	3.52023	3.11797	1.07772
27.3058	37.7712	44.1392	47.6167	45.6941	31.9666	39.6775	53.4067	63.2384	54.8624	43.2803	32.6116		1.36612	2.79531	1.71463	2.46634	1.45297		2.13742	3.66808	3.52031	3.11799	1.07772
30.7266	43.9755	51.857	27.3849	31.413	33.5212	36.1849	49.7279	60.1183	52.3413	47.4625	31.3954		1.36624	3.04418	1.71501	2.46695	1.4531		2.21961	3.92253	3.52039	3.11799	1.07773
30.0773	40.4723	45.3693	48.6542	41.7648	31.0229	37.0345	48.7355	56.418	55.2899	46.0442	30.7916		1.36637	2.20174	1.71552	2.46739	1.45326		1.90758	3.16005	3.52054	3.11805	1.07783
28.8755	38.3771	45.6518	49.8661	40.3546	32.5111	34.9281	44.9369	50.8586	53.5788	44.3065	31.3635		1.3664	2.79551	1.71599	2.46759	1.45336		1.6474	2.62209	3.52056	3.11834	1.07783
28.4839	37.8828	41.9099	38.4758	44.0663	31.4064	35.316	48.936	59.6512	55.8118	43.3281	31.3438		1.3665	1.94238	1.71618	2.46853	1.45337		2.31202	4.13096	3.52079	3.11838	1.07788
29.1085	46.5812	55.2772	47.0941	43.4209	31.7235	35.6275	49.8497	61.3584	58.1031	45.7735	31.866		1.36651	3.23746	1.71703	2.46889	1.4534		2.27603	4.11781	3.52082	3.11841	1.07799
28.8323	44.9031	51.59	48.7044	34.6994	32.991	34.9632	45.9238	53.0639	57.7374	43.5266	30.2024		1.36655	2.67003	1.71771	2.46893	1.4535		1.80548	2.98162	3.52088	3.11844	1.07806
32.1308	35.1375	42.4878	29.3584	35.6321	30.5857	32.9986	45.5401	55.2875	53.155	44.8178	29.3596		1.36658	2.92303	1.71795	2.46899	1.4536		2.21524	3.93695	3.52106	3.11864	1.07814
26.4457	36.0457	43.8704	46.3776	44.0803	32.5102	37.1284	46.6994	51.6714	58.0942	44.1999	30.4499		1.3667	3.17767	1.71801	2.46912	1.45364		1.54652	2.34992	3.52113	3.11874	1.07816
29.4954	36.2396	41.6514	45.9527	43.1081	32.4825	35.1381	46.1775	53.3848	52.4716	43.8273	31.5905		1.36673	2.28497	1.71821	2.4693	1.45365		1.84891	3.056	3.52117	3.11878	1.07842
29.4063	37.8064	42.1603	35.6193	40.2468	31.2586	35.4184	46.6824	54.1269	56.2342	43.0195	30.6536		1.36681	2.17599	1.71875	2.46945	1.45367		1.92993	3.20542	3.52143	3.11894	1.07843
30.9857	32.8511	37.6648	50.5075	41.9683	30.4891	36.909	51.8832	64.1587	54.8258	45.3625	32.2747		1.36693	2.1435	1.71877	2.46949	1.45369		2.44028	4.44077	3.5217	3.11918	1.07849
31.1262	37.2758	41.3216	48.8089	42.0118	30.9662	36.2677	47.5579	54.8606	53.3259	45.4321	31.148		1.36694	1.88536	1.71883	2.46973	1.45371		1.8258	3.00674	3.52179	3.11921	1.07851
28.7868	41.8978	51.7492	49.2255	41.1348	31.5529	34.7117	43.8917	48.8229	55.9309	44.9362	30.1161		1.36702	3.43419	1.71899	2.46982	1.4538		1.539	2.36569	3.52185	3.11944	1.07852
28.6881	36.3823	42.1436	47.5918	41.1522	31.9327	35.0032	48.6864	59.572	57.0699	45.2261	30.965		1.36706	2.44603	1.71915	2.47006	1.45385		2.31873	4.16338	3.52201	3.11957	1.07852
26.7818	37.4091	45.1272	30.9746	40.0532	32.7188	35.7128	48.1467	57.1011	57.5205	44.6128	31.9143		1.36713	2.92899	1.71929	2.47008	1.45387		2.05676	3.53794	3.52205	3.11966	1.07861
[truncated: 8,001 more rows]
[truncated: 25 more columns]

## Sheet: input
Yonkee et al., initial thickness model		model input
Ocean crust thickness		Ocean crust thickness
OC_ML = 7; %km		OC_ML = 6; %km
OC_LS = 6;		OC_LS = 3;
OC_HS = 8;		OC_HS = 8;
Kurt_OC = 1;		Kurt_OC = 1;
Water depth at ocean crust		Water depth at ocean crust
W_ML = 7.5;		W_ML = 6;
W_LS = 7;		W_LS = 5.5;
W_HS = 8;		W_HS = 7;
Kurt_W = 0.5;		Kurt_W = 0.5;
rhoW = 1030; % water density, kg/m3		rhoW = 1030; % water density, kg/m3
Mantle density		Mantle density
rhoM_ML = 3300; %mantle density (ML), kg/m3		rhoM_ML = 3300; %mantle density (ML), kg/m3
rhoM_HS = 3320; %mantle density (HS), kg/m3		rhoM_HS = 3320; %mantle density (HS), kg/m3
rhoM_LS = 3250; %mantle density (LS), kg/m3		rhoM_LS = 3250; %mantle density (LS), kg/m3
Kurt_rhoM = 2;%Kurtosis for mantle density: 1 = mesokurtic, 0.5 = platykurtic, 2 = Leptokurtic		Kurt_rhoM = 2;%Kurtosis for mantle density: 1 = mesokurtic, 0.5 = platykurtic, 2 = Leptokurtic
Ocean crust density		Ocean crust density
rhoOC_ML = 2950; %OC density (ML), kg/m3		rhoOC_ML = 2950; %mantle density (ML), kg/m3
rhoOC_HS = 3050; %OC density (HS), kg/m3		rhoOC_HS = 3050; %mantle density (HS), kg/m3
rhoOC_LS = 2900; %OC density (LS), kg/m3		rhoOC_LS = 2900; %mantle density (LS), kg/m3
Kurt_rhoOC = 1;%Kurtosis for OC density: 1 = mesokurtic, 0.5 = platykurtic, 2 = Leptokurtic		Kurt_rhoOC = 1;%Kurtosis for mantle density: 1 = mesokurtic, 0.5 = platykurtic, 2 = Leptokurtic
Continental crust crust density		Continental crust crust density
rhoCC_ML = 2750; %CC density (ML), kg/m3		rhoCC_ML = 2750; %mantle density (ML), kg/m3
rhoCC_HS = 2850; %CC density (HS), kg/m3		rhoCC_HS = 2850; %mantle density (HS), kg/m3
rhoCC_LS = 2700; %CC density (LS), kg/m3		rhoCC_LS = 2700; %mantle density (LS), kg/m3
Kurt_rhoCC = 1;%Kurtosis for mantle density: 1 = mesokurtic, 0.5 = platykurtic, 2 = Leptokurtic		Kurt_rhoCC = 1;%Kurtosis for mantle density: 1 = mesokurtic, 0.5 = platykurtic, 2 = Leptokurtic
Shortening		Shortening
Short_sev = 1/1.33;% 160 (150) km shortening over 600 km		Short_sev = 1/1.33;% 160 (150) km shortening over 600 km
Short_lar = 1/1.17; %228 km shortening over 1600 km		Short_lar = 1/1.17; %228 km shortening over 1600 km
Uncer = 0.06;		Uncer = 0.06;

## Sheet: Matlab script
clc
clear all
%Input%
Trial = 10000; % Random trian number
OC_ML = 7; %km
OC_LS = 6;
OC_HS = 8;
Kurt_OC = 1;
W_ML = 7.5;
W_LS = 7;
W_HS = 8;
Kurt_W = 2;
rhoW = 1030; % water density, kg/m3
rhoM_ML = 3300; %mantle density (ML), kg/m3
rhoM_HS = 3320; %mantle density (HS), kg/m3
rhoM_LS = 3250; %mantle density (LS), kg/m3
Kurt_rhoM = 2;%Kurtosis for mantle density: 1 = mesokurtic, 0.5 = platykurtic, 2 = Leptokurtic
rhoOC_ML = 2950; %OC density (ML), kg/m3
rhoOC_HS = 3050; %OC density (HS), kg/m3
rhoOC_LS = 2900; %OC density (LS), kg/m3
Kurt_rhoOC = 2;%Kurtosis for OC density: 1 = mesokurtic, 0.5 = platykurtic, 2 = Leptokurtic
rhoCC_ML = 2750; %CC density (ML), kg/m3
rhoCC_HS = 2850; %CC density (HS), kg/m3
rhoCC_LS = 2700; %CC density (LS), kg/m3
Kurt_rhoCC = 2;%Kurtosis for mantle density: 1 = mesokurtic, 0.5 = platykurtic, 2 = Leptokurtic
Short_sev = 1/1.33;% 160 (150) km shortening over 600 km
Short_lar = 1/1.17; %228 km shortening over 1600 km
Uncer = 0.06;
%Shortening Range%
n = Trial;
n_ones = linspace(1,1,n);
rand_noise = transpose((1-Uncer)+((2*Uncer).*rand(n,1)));
Rand_short_sev = Short_sev.*rand_noise;
Rand_CoE_sev = 1./Rand_short_sev;
Rand_short_lar = Short_lar.*rand_noise;
Rand_CoE_lar = 1./Rand_short_lar;
%DENSITY DISTRIBUTIONS%
%Mantle%
n = Trial;
M_rhoM = (rhoM_ML-rhoM_LS)/(rhoM_HS-rhoM_LS);
a_rhoM = 3*Kurt_rhoM;
b_rhoM = 2-a_rhoM+(a_rhoM/M_rhoM)-(1/M_rhoM);
Rand_rhoM = rhoM_LS + ((rhoM_HS-rhoM_LS)*betarnd(a_rhoM,b_rhoM,1,n));
%Oceanic crust%
M_rhoOC = (rhoOC_ML-rhoOC_LS)/(rhoOC_HS-rhoOC_LS);
a_rhoOC = 3*Kurt_rhoOC;
b_rhoOC = 2-a_rhoOC+(a_rhoOC/M_rhoOC)-(1/M_rhoOC);
Rand_rhoOC = rhoOC_LS + ((rhoOC_HS-rhoOC_LS)*betarnd(a_rhoOC,b_rhoOC,1,n));
%Continental crust%
M_rhoCC = (rhoCC_ML-rhoCC_LS)/(rhoCC_HS-rhoCC_LS);
a_rhoCC = 3*Kurt_rhoCC;
b_rhoCC = 2-a_rhoCC+(a_rhoCC/M_rhoCC)-(1/M_rhoCC);
Rand_rhoCC = rhoCC_LS + ((rhoCC_HS-rhoCC_LS)*betarnd(a_rhoCC,b_rhoCC,1,n));
Rand_rhoW = linspace(rhoW,rhoW,n);
%Thickness DISTRIBUTIONS%
%Oceanic crust%
M_OC = (OC_ML-OC_LS)/(OC_HS-OC_LS);
a_OC = 3*Kurt_OC;
b_OC = 2-a_OC+(a_OC/M_OC)-(1/M_OC);
Rand_OC = OC_LS + ((OC_HS-OC_LS)*betarnd(a_OC,b_OC,1,n));
%Water depth%
M_W = (W_ML-W_LS)/(W_HS-W_LS);
a_W = 3*Kurt_W;
b_W = 2-a_W+(a_W/M_W)-(1/M_W);
Rand_W = W_LS + ((W_HS-W_LS)*betarnd(a_W,b_W,1,n));
%CC thickness calculation%
W_Mdiff = gsubtract(Rand_rhoW,Rand_rhoM);
OC_Mdiff = gsubtract(Rand_rhoOC,Rand_rhoM);
CC_Mdiff = gsubtract(Rand_rhoCC,Rand_rhoM);
Numer = gadd((Rand_W.*(W_Mdiff)),(Rand_OC.*(OC_Mdiff)));
CC_Thick = Numer./CC_Mdiff;
AvgCC_Thick = mean(CC_Thick)
%post_Sevier crustal thickness%
PC_CC_sev = CC_Thick.*Rand_CoE_sev;
AvgSev_CC=mean(PC_CC_sev)
%post_Laramide crustal thickness%
PC_CC_lar = PC_CC_sev.*Rand_CoE_lar;
AvgLar_CC=mean(PC_CC_lar)
%Elevation calculation_Sevier%
M_Cdiff = gsubtract(Rand_rhoM,Rand_rhoCC);
Numer1 = gadd((Rand_W.*(W_Mdiff)),(Rand_OC.*(OC_Mdiff)));
Numer2_sev = gadd((Numer1),(PC_CC_sev.*(M_Cdiff)));
Elev_Sev = Numer2_sev./Rand_rhoM;
AvgElev_Sev = mean(Elev_Sev)
%Elevation calculation_Laramide%
Numer2_lar = gadd((Numer1),(PC_CC_lar.*(M_Cdiff)));
Elev_Lar = Numer2_lar./Rand_rhoM;
AvgElev_Lar = mean(Elev_Lar)
figure (1)
histogram(CC_Thick,25)
hold on
yyaxis right
cdfplot(CC_Thick)
xlabel('Crustal thickness at sea level')
figure (2)
histogram(PC_CC_sev,25)
hold on
yyaxis right
cdfplot(PC_CC_sev)
xlabel('End Sevier crustal thickness')
figure (3)
histogram(Elev_Sev,25)
hold on
yyaxis right
cdfplot(Elev_Sev)
xlabel('End Sevier elevation')
figure (4)
histogram(PC_CC_lar,25)
hold on
yyaxis right
cdfplot(PC_CC_lar)
xlabel('End Laramide crustal thickness')
figure (5)
histogram(Elev_Lar,25)
hold on
yyaxis right
cdfplot(Elev_Lar)
xlabel('End Laramide elevation')

## Sheet: Info
Appendix S6: Matlab script and inputs used to estimate crustal thickness and plateau elevations during Mesozoic compression.
Supplemental Material accompanies
Konstantinou, A., 2022, The “death” of the Sevier-Laramide orogen: Gravitational collapse of the crust
or something else?, in Craddock, J.P., Malone, D.H., Foreman, B.Z., and Konstantinou, A., eds., Tectonic
Evolution of the Sevier-Laramide Hinterland, Thrust Belt, and Foreland, and Postorogenic Slab Rollback
(180–20 Ma): Geological Society of America Special Paper 555, https://doi.org/10.1130/2021.2555(15).
